# Supplementary material for: Preliminary matrix bias calibrations for ion microprobe oxygen isotope analysis of pyroxene
Source: Royal Society of Chemistry journal article supplement (doi:10.1039/d5ja00491h), 2026-01-01
Supplement: d5ja00491h3.xlsx [file d5ja00491h3.xlsx]

## Sheet: Table S1
1
	Table S1. EPMA data for pyroxene.
	Mount_Sample_Grain-Analysis	SiO2 (wt.%)	TiO2	Al2O3	Cr2O3	FeO	MnO	MgO	CaO	Na2O	K2O	Total		Wo (mol%)	En	Fs	Rdn	sum	Aeg	Jd	Q (Wo,En,Fs,Rdn)	sum	Comments
	CAM-ANU (Canberra)
	Session-201117
	BF084_06JY29CPX_Cpx2	53.62	0.2022	4.68	1.2789	2.51	0.0736	16.11	20.52	1.3248	0	100.401		45.6479	49.8643	4.35829	0.129434	100	0	5.06312	94.9369	100
	BF084_06JY29CPX_Cpx3	53.9	0.1795	4.54	1.1632	2.58	0.0959	16.15	20.69	1.3049	0	100.655		45.7231	49.659	4.45034	0.167541	100	0	4.95963	95.0404	100
	BF084_06JY29CPX_Cpx4	53.57	0.1751	4.61	1.275	2.49	0.0831	16.1	20.56	1.3445	0	100.244		45.7186	49.8135	4.32183	0.146083	100	0	5.1326	94.8674	100
	BF084_06JY29CPX_Cpx5	53.38	0.1697	4.55	1.1518	2.47	0.0871	16.21	20.58	1.3323	0	99.9987		45.6002	49.9753	4.27186	0.15257	100	0.0256533	5.04685	94.9275	100
	BF084_06JY29CPX_Cpx6	53.97	0.199	4.48	1.1171	2.55	0.1033	16.15	20.5	1.4	0	100.517		45.512	49.8879	4.41886	0.181301	100	0	5.32505	94.6749	100
	BF084_06JY29CPX_Cpx8	53.9	0.1691	4.48	1.2924	2.45	0.0696	16.13	20.74	1.3068	0	100.575		45.9352	49.7075	4.23546	0.121864	100	0	4.97696	95.023	100
	06JY29CPX (average, n=6)	53.7233	0.182433	4.55667	1.21307	2.50833	0.0854333	16.1417	20.5983	1.33555	0	100.345		45.6896	49.8178	4.34279	0.14981	100	0	5.0881	94.9119	100
	%RSD	0.436799	8.0092	1.70369	6.37622	1.95985	15.0601	0.242852	0.466074	2.62086	0			3.27312	2.37301	10.7431	83.6108	100	8.76525	18.4101	72.8246	100
	BF084_06JY31CPX_Cpx1	53.28	0.3345	4.62	1.2543	2.86	0.0729	16.08	20.61	1.1039	0.0058	100.273		45.5232	49.4187	4.93082	0.127295	100	0	4.22592	95.7741	100
	BF084_06JY31CPX_Cpx2	53.42	0.2693	4.55	1.1031	2.97	0.0814	16.36	20.59	1.0846	0.0058	100.498		45.0194	49.7712	5.06872	0.140701	100	0	4.11485	95.8852	100
	BF084_06JY31CPX_Cpx3	53.64	0.2896	4.59	1.2484	2.77	0.0769	16.1	20.76	1.1517	0.0066	100.682		45.7426	49.3594	4.764	0.133952	100	0	4.39059	95.6094	100
	BF084_06JY31CPX_Cpx4-1	52.87	0.338	4.65	1.0536	2.83	0.0836	15.96	20.78	1.1759	0.0082	99.8156		45.9108	49.0628	4.88038	0.146017	100	0	4.49031	95.5097	100
	BF084_06JY31CPX_Cpx4-2	53.4	0.3314	4.65	1.0129	2.88	0.0959	16.11	20.67	1.1348	0	100.341		45.5194	49.3631	4.95048	0.166956	100	0	4.32669	95.6733	100
	BF084_06JY31CPX_Cpx5	53.43	0.2774	4.44	1.1403	2.8	0.0932	16.16	20.76	1.143	0.0035	100.299		45.6222	49.413	4.80292	0.161917	100	0	4.34789	95.6521	100
	06JY31CPX (average, n=6)	53.34	0.3067	4.58333	1.13543	2.85167	0.0839833	16.1283	20.695	1.13232	0.00498333	100.262		45.5554	49.3987	4.89973	0.146149	100	0	4.3159	95.6841	100
	%RSD	0.48353	10.2198	1.74364	8.77819	2.46387	10.74	0.815439	0.401674	2.92371	57.6925			3.3613	9.49459	16.0935	71.0506	100	12.5553	21.9855	65.4592	100
	BF084_06JY31OPX_Opx1	56.56	0.0897	3.37	0.4759	6.03	0.1426	32.94	0.7227	0.0818	0	100.559		1.40672	89.2124	9.16149	0.219431	100	0	0.287305	99.7127	100
	BF084_06JY31OPX_Opx2-1	56.57	0.0769	3.33	0.5026	6.01	0.1506	33.1	0.7425	0.0776	0	100.687		1.43873	89.2407	9.08986	0.230694	100	0	0.271366	99.7286	100
	BF084_06JY31OPX_Opx2-2	56.48	0.0741	3.34	0.5277	6.13	0.1333	33.08	0.7143	0.0583	0.0013	100.633		1.38345	89.1454	9.26705	0.204099	100	0	0.203917	99.7961	100
	BF084_06JY31OPX_Opx3-1	56.68	0.088	3.4	0.5153	6.16	0.139	32.73	0.913	0.0897	0	100.82		1.77725	88.6492	9.3596	0.213905	100	0	0.314985	99.685	100
	BF084_06JY31OPX_Opx3-2	56.44	0.073	3.38	0.5035	6.01	0.1176	33.28	0.6827	0.0848	0	100.693		1.31866	89.4408	9.06096	0.179571	100	0	0.29553	99.7045	100
	BF084_06JY31OPX_Opx4	56.26	0.0957	3.49	0.553	6.15	0.126	33	0.9231	0.1125	0	100.801		1.78414	88.7453	9.278	0.192522	100	0	0.391938	99.6081	100
	06JY31OPX (average, n=6)	56.4983	0.0829	3.385	0.513	6.08167	0.13485	33.0217	0.78305	0.0841167	0.000216667	100.585		1.51804	89.0726	9.2027	0.206668	100	0	0.294229	99.7058	100
	%RSD	0.2534	11.4124	1.69963	5.08036	1.18761	8.79706	0.555897	13.5854	20.9421	244.949			61.0845	3.47779	4.16803	31.2697	100	1.56556	62.4387	35.9957	100
	BF084_06JY34OPX_Opx1	57.13	0.0855	2.86	0.5741	5.32	0.1751	33.81	0.6273	0.1257	0.0018	100.812		1.20724	90.5348	7.99152	0.2664	100	0	0.43586	99.5641	100
	BF084_06JY34OPX_Opx2	57.3	0.0661	2.93	0.5286	5.46	0.1392	33.67	0.7227	0.1217	0	101.04		1.39134	90.1921	8.20475	0.211856	100	0	0.422198	99.5778	100
	BF084_06JY34OPX_Opx3	57.2	0.0781	2.92	0.5803	5.37	0.1375	33.6	0.7386	0.1208	0.0017	100.818		1.42615	90.2706	8.09336	0.209888	100	0	0.420323	99.5797	100
	BF084_06JY34OPX_Opx4	57.1	0.0813	2.88	0.5251	5.41	0.1358	33.59	0.7225	0.1357	0.0011	100.698		1.39507	90.244	8.15367	0.207293	100	0	0.471924	99.5281	100
	BF084_06JY34OPX_Opx5	57.29	0.0753	2.86	0.5476	5.5	0.1173	33.77	0.6038	0.1081	0	100.977		1.16167	90.4005	8.25943	0.178408	100	0	0.374949	99.6251	100
	BF084_06JY34OPX_Opx6	57.08	0.0669	2.88	0.5765	5.36	0.1408	33.67	0.7029	0.1219	0	100.713		1.35574	90.3601	8.06948	0.214691	100	0	0.423674	99.5763	100
	06JY34OPX (average, n=6)	57.1833	0.0755333	2.88833	0.555367	5.40333	0.14095	33.685	0.6863	0.122317	0.000766667	100.741		1.32275	90.3338	8.12873	0.214761	100	0	0.424804	99.5752	100
	%RSD	0.167248	10.302	1.03674	4.49221	1.24241	13.3375	0.264029	8.22539	7.2714	113.91			40.9092	1.82712	4.82313	52.4406	100	3.0028	37.7417	59.2555	100
	BF084_13NQ124CPX_Cpx11	56.08	0.035	1.6005	0.3059	2.09	0.0186	16.68	23.06	1.0237	0.0011	100.976		48.1274	48.4373	3.40469	0.0306884	100	0	3.72237	96.2776	100
	BF084_13NQ124CPX_Cpx17	55.35	0.0511	1.5849	0.3211	2.17	0.045	16.32	23.07	0.9826	0	99.9933		48.5613	47.7985	3.56534	0.074883	100	0	3.60787	96.3921	100
	BF084_13NQ124CPX_Cpx2	55.82	0.0407	1.4411	0.3136	1.97	0.0174	16.47	23.1	1.0406	0	100.261		48.5623	48.1761	3.2326	0.0289178	100	0	3.80802	96.192	100
	BF084_13NQ124CPX_Cpx3	55.56	0.0265	1.6856	0.3279	2.15	0.0236	16.57	23.4	0.6806	0.004	100.535		48.5958	47.8803	3.48514	0.0387457	100	0	2.494	97.506	100
	BF084_13NQ124CPX_Cpx4	55.7	0.0273	1.7157	0.2278	2.09	0.0354	16.66	22.9	0.8807	0.0089	100.304		47.9682	48.5561	3.41714	0.0586204	100	0	3.23053	96.7695	100
	BF084_13NQ124CPX_Cpx8	55.91	0.0321	1.6887	0.3487	2.05	0.0461	16.41	22.96	0.8753	0	100.386		48.4088	48.1407	3.37369	0.076839	100	0	3.23171	96.7683	100
	13NQ124CPX (average, n=6)	55.7367	0.03545	1.61942	0.3075	2.08667	0.0310167	16.5183	23.0817	0.913917	0.00233333	100.333		48.3705	48.1649	3.41322	0.051385	100	0	3.34975	96.6503	100
	%RSD	0.465743	26.1729	6.28505	13.5578	3.45137	41.7103	0.865867	0.75061	14.6679	153.035			1.99507	3.20218	7.16032	87.6424	100	4.38235	38.7967	56.8209	100
	BF084_2C42CPX_Cpx11-6	55.47	0.0991	1.2891	0.6407	1.99	0.054	16.96	23.55	0.6421	0	100.725		48.3136	48.4122	3.18662	0.087579	100	0	2.3283	97.6717	100
	BF084_2C42CPX_Cpx12-5	55.18	0.1093	1.6465	0.8879	2.04	0.0595	16.59	23.11	0.7768	0	100.422		48.3143	48.2584	3.32893	0.0983379	100	0	2.85493	97.1451	100
	BF084_2C42CPX_Cpx13-4	55.26	0.0702	2.23	1.1755	2.17	0.0746	16.11	22.47	1.0923	0.0031	100.672		48.1794	48.0624	3.63176	0.126452	100	0	4.06595	95.934	100
	BF084_2C42CPX_Cpx14-3	54.91	0.122	1.2375	0.7908	1.86	0.0489	17.13	23.57	0.5309	0	100.235		48.2052	48.7464	2.96924	0.0790627	100	0	1.92702	98.073	100
	BF084_2C42CPX_Cpx15-2	54.55	0.1215	1.4828	1.0429	2.02	0.0561	16.63	23.31	0.7352	0	99.9833		48.4918	48.1359	3.28001	0.0922608	100	0	2.69317	97.3068	100
	BF084_2C42CPX_Cpx16-1	55.36	0.1173	1.5755	1.0223	1.92	0.0539	16.61	23.15	0.7293	0.0016	100.591		48.4286	48.3472	3.13509	0.089139	100	0	2.68669	97.3133	100
	2C42CPX (average, n=6)	55.1217	0.106567	1.5769	0.926683	2	0.0578333	16.6717	23.1933	0.7511	0.000783333	100.407		48.3224	48.3298	3.25247	0.0952559	100	0	2.75388	97.2461	100
	%RSD	0.613759	18.5892	22.6574	20.8308	5.33854	15.405	2.11369	1.74044	25.1328	166.333			8.27725	13.9868	19.8174	57.9185	100	6.68418	66.2712	27.0446	100
	BF084_2C47-2CPX_Cpx1	55.01	0.0845	1.4488	0.9741	2.64	0.0297	16.34	23.1	0.7081	0	100.39		48.2058	47.445	4.30021	0.0489973	100	0	2.60442	97.3956	100
	BF084_2C47-2CPX_Cpx2	55.43	0.0938	1.7549	0.8584	2.73	0.0364	15.9	22.13	1.2729	0.0046	100.294		47.6807	47.6661	4.59116	0.0619999	100	0	4.72834	95.2717	100
	BF084_2C47-2CPX_Cpx3	54.75	0.0837	1.3185	0.7017	2.63	0.0572	16.5	23.14	0.692	0.0001	99.9051		48.0122	47.6346	4.25934	0.0938236	100	0	2.53246	97.4675	100
	BF084_2C47-2CPX_Cpx4	54.94	0.0757	1.3809	1.0248	2.66	0.069	16.5	22.95	0.7286	0	100.375		47.7738	47.7906	4.32203	0.113549	100	0	2.67132	97.3287	100
	BF084_2C47-2CPX_Cpx5	55.44	0.067	1.4794	1.0624	2.65	0.0572	15.85	22.07	1.2734	0	99.9685		47.732	47.6966	4.47354	0.0977984	100	0	4.74722	95.2528	100
	BF084_2C47-2CPX_Cpx6	55.43	0.0725	1.2672	0.8063	2.6	0.069	16.35	22.77	0.9508	0.003	100.385		47.8328	47.7894	4.26319	0.114588	100	0	3.48836	96.5116	100
	2C47-2CPX (average, n=6)	55.1667	0.0795333	1.44162	0.904617	2.65167	0.0530833	16.24	22.6933	0.937633	0.00128333	100.169		47.8749	47.6701	4.36643	0.0885311	100	0	3.45587	96.5441	100
	%RSD	0.551566	12.1489	11.9701	15.4085	1.64239	31.1338	1.79524	2.10645	29.4803	156.964			6.9066	8.19007	4.20328	80.7001	100	1.55266	63.0607	35.3866	100
	BF063_944010-2OMP_Omp1	56.34	0.0481	7.07	0.0034	2.65	0.0011	11.85	18	4.18	0.0028	100.183		49.2377	45.1019	5.65808	0.00237873	100	0	17.1441	82.8559	100
	BF063_944010-2OMP_Omp2	56.85	0.0471	8.81	0.0336	2.59	0.009	10.56	16.14	5.3	0.0025	100.348		49.1147	44.7118	6.15185	0.021651	100	0	22.5922	77.4078	100
	BF063_944010-2OMP_Omp3	56.85	0.0274	8.72	0.0315	2.75	0.0297	10.57	16.35	5.19	0.0074	100.535		49.2069	44.2623	6.4601	0.0706631	100	0	22.037	77.963	100
	BF063_944010-2OMP_Omp4	56.64	0.0563	9.03	0.0349	2.68	0.0302	10.28	15.8	5.56	0.0064	100.118		49.0389	44.3944	6.49258	0.0741001	100	0	23.7969	76.2031	100
	BF063_944010-2OMP_Omp5	56.57	0.0247	8.15	0.0054	2.52	0.0145	11	16.9	4.97	0.0048	100.159		49.4386	44.7737	5.75412	0.0335333	100	0	20.8299	79.1701	100
	BF063_944010-2OMP_Omp6	56.49	0.0396	7.99	0	2.88	0	10.88	16.92	4.87	0.0076	100.077		49.3203	44.1271	6.55264	0	100	0	20.4384	79.5616	100
	944010-2OMP (average, n=6)	56.6233	0.0405333	8.295	0.0181333	2.67833	0.0140833	10.8567	16.685	5.01167	0.00525	100.228		49.229	44.57	6.16819	0.0328495	100	0	21.11	78.89	100
	%RSD	0.356668	30.6758	8.69457	92.5102	4.70748	95.0816	5.06272	4.66035	9.48191	42.7915			5.14697	7.77978	4.05807	83.0152	100	3.53207	12.962	83.506	100
	BF063_95HN24-2OMP_Omp1	55.92	0.1445	10.9	0.096	4.54	0.0513	8.24	13.78	6.27	0.0055	99.9537		47.7985	39.7689	12.2919	0.140673	100	0	28.2419	71.7581	100
	BF063_95HN24-2OMP_Omp2	56.83	0.0758	11.21	0.0663	3.84	0.052	8.37	13.46	6.71	0	100.632		47.8248	41.3794	10.6497	0.146063	100	0	30.1403	69.8597	100
	BF063_95HN24-2OMP_Omp3	56.47	0.1398	10.96	0.0682	4.39	0.0564	8.39	13.75	6.4	0.0056	100.642		47.5861	40.4008	11.8588	0.154307	100	0	28.6131	71.3869	100
	BF063_95HN24-2OMP_Omp4	56.11	0.1521	10.77	0.1173	4.46	0.0464	8.35	13.82	6.37	0	100.196		47.7275	40.1234	12.0225	0.12668	100	0	28.4742	71.5258	100
	BF063_95HN24-2OMP_Omp5	56.15	0.1258	10.91	0.0899	4.51	0.0229	8.34	13.66	6.43	0.0037	100.257		47.4263	40.2889	12.222	0.0628538	100	0	28.7743	71.2257	100
	BF063_95HN24-2OMP_Omp6	56.35	0.1214	10.92	0.0709	4.49	0.014	8.39	13.7	6.35	0.003	100.409		47.422	40.4085	12.1312	0.0383103	100	0	28.457	71.543	100
	95HN24-2OMP (average, n=6)	56.305	0.126567	10.945	0.0847667	4.37167	0.0405	8.34667	13.695	6.42167	0.00296667	100.34		47.6301	40.3909	11.8677	0.111353	100	0	28.7832	71.2168	100
	%RSD	0.570079	21.647	1.3237	23.7043	6.07175	43.4529	0.672067	0.937097	2.35634	84.5971			2.28767	2.28282	11.5696	83.8599	100
	BF063_95HN68OMP_Omp1	55.98	0.1349	10.89	0.0979	4.93	0.0423	7.96	13.6	6.52	0.006	100.183		47.624	38.7838	13.4751	0.1171	100	0	29.2369	70.7631	100
	BF063_95HN68OMP_Omp2	56.48	0.0893	10.64	0.0177	4.7	0	8.31	13.85	6.32	0	100.407		47.6255	39.7596	12.615	0	100	0	28.2266	71.7734	100
	BF063_95HN68OMP_Omp3	56.6	0.0844	11.24	0.03	4.29	0.005	8.02	13.24	6.79	0	100.306		47.7091	40.2104	12.0662	0.0142433	100	0	30.6886	69.3114	100
	BF063_95HN68OMP_Omp4	56	0.1033	11	0.2777	4.38	0.0045	7.88	13.26	6.66	0.0074	99.5744		47.9626	39.6585	12.3661	0.0128677	100	0	30.359	69.641	100
	BF063_95HN68OMP_Omp5	56.34	0.0966	10.98	0.1477	4.5	0.024	8.08	13.39	6.56	0.0042	100.128		47.5431	39.918	12.4715	0.0673669	100	0	29.6519	70.3481	100
	BF063_95HN68OMP_Omp6	56.05	0.0963	10.82	0.0238	4.77	0.0357	8.16	13.53	6.53	0	100.03		47.2495	39.6498	13.0022	0.0985589	100	0	29.212	70.788	100
	95HN68OMP (average, n=6)	56.2417	0.1008	10.9283	0.0991333	4.595	0.0185833	8.06833	13.4783	6.56333	0.00293333	100.096		47.6167	39.6605	12.6709	0.0519009	100	0	29.5577	70.4423	100
	%RSD	0.476092	17.7918	1.83597	102.209	5.34984	96.6511	1.89175	1.71732	2.38905	114.875			2.02198	3.09913	4.9166	89.9623	100	4.90807	0.173363	94.9186	100
	BF063_97M43OPX_Opx1	50.43	0.0732	5.47	0.2481	21.84	0.2235	21.35	0.0779	0	0.0049	99.7467		0.165716	63.1941	36.2643	0.375867	100	0	0	100	100
	BF063_97M43OPX_Opx2	49.98	0.2479	5.39	0.2229	22.28	0.2058	20.78	0.1006	0.0222	0	99.2459		0.216032	62.0894	37.3452	0.349377	100	0	0.0861963	99.9138	100
	BF063_97M43OPX_Opx3	49.57	0.1022	5.32	0.0909	23.82	0.2282	19.8	0.0702	0.0048	0.0026	99.0418		0.151316	59.3834	40.0764	0.388859	100
	BF063_97M43OPX_Opx4	49.97	0.1509	5.27	0.2826	22.19	0.1963	20.88	0.0719	0.0057	0.0055	99.0524		0.154293	62.3444	37.1682	0.333016	100	0	0.0221301	99.9779	100
	BF063_97M43OPX_Opx5	50.46	0.0638	4.29	0.2371	22.41	0.2236	21.15	0.0513	0.0201	0.0189	98.9577		0.108806	62.4161	37.1002	0.374917	100
	BF063_97M43OPX_Opx6	49.95	0.1108	5.25	0.2106	22.34	0.2225	20.78	0.0582	0	0.0063	98.9439		0.124934	62.0659	37.4316	0.377585	100	0	0	100	100
	97M43OPX (average, n=6)	50.06	0.1248	5.165	0.215367	22.48	0.21665	20.79	0.0716833	0.0088	0.00636667	99.1387		0.153442	61.9203	37.5597	0.366618	100	0	0.0340762	99.9659	100
	%RSD	0.670671	54.2571	8.44618	30.5436	3.05213	5.81911	2.57378	23.955	112.235	102.928			69.3971	10.3745	6.90154	13.3269	100	1.01273	85.3261	13.6612	100
	BF064_97M44OPX_Opx1	50.18	0.1009	6.02	0.1859	20.66	0.1159	21.9	0.0726	0.0181	0	99.2854		0.155255	65.1633	34.4855	0.195938	100	0	0.0699958	99.93	100
	BF084_97M44OPX_Opx1-2	50.5	0.097	6.11	0.239	21.18	0.1688	21.24	0.0627	0.0009	0	99.6533		0.135476	63.8556	35.7206	0.288333	100	0	0.00351893	99.9965	100
	BF084_97M44OPX_Opx2	50.3	0.107	6.27	0.2624	21.06	0.1704	21.32	0.0584	0	0	99.5938		0.126145	64.0759	35.507	0.290974	100	0	0	100	100
	BF064_97M44OPX_Opx2	50.79	0.0748	4.97	0.1577	20.07	0.109	22.76	0.0702	0	0	99.0255		0.14782	66.6838	32.987	0.181448	100
	BF063_97M44OPX_Opx6	50.31	0.101	5.48	0.2317	21.33	0.1672	21.92	0.0584	0.0138	0	99.6121		0.123365	64.4276	35.1698	0.279219	100
	BF063_97M44OPX_Opx7	50.12	0.0913	5.5	0.2386	21.5	0.1618	21.46	0.0621	0	0	99.1454		0.132604	63.7597	35.8346	0.273132	100	0	0	100	100
	97M44OPX (average, n=6)	50.3667	0.0953333	5.725	0.219217	20.9667	0.14885	21.7667	0.0640667	0.00546667	0	99.3579		0.136797	64.6679	34.9441	0.25126	100	0	0.0211186	99.9789	100
	%RSD	0.486602	11.8664	8.60322	17.8805	2.49543	19.0979	2.59799	9.37547	150.746				31.2142	12.035	6.48488	50.2659	100	0.647361	90.0174	9.33525	100
	BF063_97SL17OMP_Omp1	56.75	0.0489	12.74	0	5.05	0.0328	6.57	10.92	7.98	0.0032	100.099		45.4448	38.0433	16.4041	0.10791	100	0	37.5379	62.4621	100
	BF063_97SL17OMP_Omp2	56.3	0.0874	12.25	0.0089	4.26	0	7.39	12.08	7.33	0.0037	99.7164		47.0267	40.0288	12.9445	0	100	0	34.0535	65.9465	100
	BF063_97SL17OMP_Omp3	56.48	0.0773	12.29	0.0313	4.11	0.0073	7.33	11.83	7.52	0	99.6808		46.8649	40.4034	12.7088	0.022862	100	0	35.027	64.973	100
	BF063_97SL17OMP_Omp4	56.29	0.1195	11.91	0	4.41	0.0385	7.71	12.86	6.85	0	100.195		47.5235	39.6435	12.7205	0.112475	100	0	31.4169	68.5831	100
	BF063_97SL17OMP_Omp6	56.44	0.0904	11.99	0.0095	4.18	0	7.54	12.19	7.37	0	99.8153		46.9862	40.4379	12.576	0	100	0	33.9529	66.0471	100
	BF063_97SL17OMP_Omp7	56.5	0.0645	11.99	0.0252	4.27	0.0212	7.35	12.17	7.41	0	99.8317		47.2686	39.7211	12.9452	0.0650948	100	0	34.2461	65.7539	100
	97SL17OMP (average, n=6)	56.46	0.0813333	12.195	0.0124833	4.38	0.0166333	7.315	12.0083	7.41	0.00115	99.8799		46.874	39.7296	13.3451	0.0513282	100	0	34.3585	65.6415	100
	%RSD	0.297429	29.7493	2.52571	104.397	7.8374	100.63	5.36035	5.27455	4.89787	155.528			5.36015	7.57943	6.21674	80.8437	100	6.04798	2.71469	91.2373	100
	BF063_97SL21OMP_Omp1	56.23	0.0963	11.81	0.004	4.71	0	7.56	12.62	7.04	0.0031	100.079		47.0626	39.2274	13.71	0	100	0	32.2077	67.7923	100
	BF063_97SL21OMP_Omp2	56.11	0.1029	11.64	0.034	4.84	0.0318	7.52	12.88	6.88	0.0026	100.061		47.4466	38.5441	13.9166	0.0926072	100	0	31.4428	68.5572	100
	BF063_97SL21OMP_Omp3	55.49	0.132	11.53	0.0075	5.19	0.0323	7.61	13.25	6.73	0.0022	99.974		47.4654	37.9312	14.512	0.0914727	100	0.992295	29.6848	69.3229	100
	BF063_97SL21OMP_Omp4	56.94	0.0438	12.03	0	4.17	0.0441	7.43	11.94	7.43	0.0075	100.07		46.6993	40.4339	12.7304	0.136356	100	0	34.4639	65.5361	100
	BF063_97SL21OMP_Omp5	56.55	0.065	12.15	0	4.58	0	7.39	12.26	7.2	0	100.215		46.942	39.3701	13.6878	0	100	0	33.2834	66.7166	100
	BF063_97SL21OMP_Omp6	56.59	0.0867	12.04	0	4.43	0.0284	7.5	12.18	7.32	0	100.182		46.6743	39.9892	13.2505	0.0860353	100	0	33.6699	66.3301	100
	97SL21OMP (average, n=6)	56.3183	0.0877833	11.8667	0.00758333	4.65333	0.0227667	7.50167	12.5217	7.1	0.00256667	100.082		47.057	39.2257	13.6497	0.0676378	100	0	32.5621	67.4379	100
	%RSD	0.888266	34.9669	2.08108	175.261	7.53642	80.8956	1.08433	3.89948	3.75927	107.314			5.18254	2.00516	7.81807	84.9942	100	7.72359	1.20841	91.068	100
	BF063_97SL61CPX_Di1	55.13	0.044	1.1055	0.0262	1.63	0.005	16.89	24.72	0.5973	0.01	100.211		49.9425	47.4791	2.57044	0.00798583	100	0.389654	1.75576	97.8546	100
	BF063_97SL61CPX_Di4	55.23	0.0242	0.9618	0	1.4	0.0017	17	25.01	0.5611	0	100.201		50.2634	47.5377	2.19616	0.00270094	100	0.441075	1.56758	97.9913	100
	BF063_97SL61CPX_Di5	54.68	0.0491	1.1625	0.036	1.7	0.0224	16.82	24.94	0.4328	0	99.8511		50.1933	47.1006	2.67052	0.035639	100	0.367005	1.19048	98.4425	100
	BF063_97SL61CPX_Di6	54.98	0.0332	1.1622	0.0365	1.75	0.0039	16.88	24.78	0.6369	0	100.286		49.9236	47.3182	2.75195	0.00621152	100	1.20011	1.09645	97.7034	100
	BF063_97SL61CPX_Di7	54.91	0.0525	1.0769	0.0518	1.61	0.0118	16.8	24.94	0.5031	0	99.9678		50.3011	47.1456	2.53457	0.0188144	100	0.229224	1.57802	98.1928	100
	BF063_97SL61CPX_Di8	54.82	0.0311	1.1734	0.009	1.64	0	16.85	24.75	0.6114	0.0008	99.8857		50.0251	47.3875	2.58735	0	100	1.00246	1.20684	97.7907	100
	97SL61CPX (average, n=6)	54.9583	0.0390167	1.10705	0.0265833	1.62167	0.00746667	16.8733	24.8567	0.5571	0.0018	100.049		50.1083	47.3281	2.55168	0.0118993	100	0.604127	1.39973	97.9961	100
	%RSD	0.366345	28.6403	7.28573	72.1412	7.41434	111.988	0.420184	0.487217	13.7444	223.883			0.51076	0.612893	6.06688	92.8095	100	5.05542	16.6717	78.2728	100
	BF063_97SL62CPX_Di2	54.86	0.0217	0.8922	0	1.83	0.0034	16.85	24.56	0.6444	0	99.6945		49.6803	47.4249	2.88938	0.00543704	100	1.09847	1.23134	97.6702	100
	BF063_97SL62CPX_Di3	55.01	0.0283	0.9514	0.0151	1.91	0.0247	16.76	24.67	0.6198	0	99.9972		49.8382	47.1106	3.01179	0.0394474	100	0.756742	1.47569	97.7676	100
	BF063_97SL62CPX_Di4	54.87	0.0257	0.8539	0.0269	1.98	0.0252	16.77	24.87	0.4263	0	99.871		49.9707	46.8839	3.1053	0.0400284	100	0.161147	1.3677	98.4712	100
	BF063_97SL62CPX_Di5	54.94	0.0301	1.0715	0.0648	2	0.0196	16.55	24.36	0.7686	0.0016	99.8312		49.7506	47.0295	3.18823	0.031645	100	0.903025	1.88406	97.2129	100
	BF063_97SL62CPX_Di6	54.77	0.0369	1.102	0.0366	2.24	0.0353	16.57	24.55	0.6171	0	99.9579		49.7147	46.6882	3.54062	0.0565114	100	0.939441	1.29273	97.7678	100
	BF063_97SL62CPX_Di8	54.71	0.0321	1.0384	0.0875	2.22	0.0269	16.4	24.72	0.649	0.0013	99.8867		50.1491	46.2924	3.51533	0.0431415	100	1.12029	1.23292	97.6468	100
	97SL62CPX (average, n=6)	54.86	0.0291333	0.9849	0.0384833	2.03	0.0225167	16.65	24.6217	0.620867	0.000483333	99.8581		49.8508	46.9051	3.20811	0.0360402	100	0.828718	1.41391	97.7574	100
	%RSD	0.199013	18.0193	10.2494	84.2874	8.18387	47.3581	1.0242	0.706002	17.7963	156.158			1.5362	3.10081	13.8994	81.4636	100	8.89991	35.9693	55.1308	100
	BF063_97SL65CPX_Di1	55.18	0.0273	1.1311	0.0565	1.59	0	16.74	24.7	0.6339	0	100.085		50.1696	47.3096	2.5208	0	100	0.0121781	2.26503	97.7228	100
	BF084_97SL65CPX_Di1	55.77	0.0202	0.9482	0.0713	1.62	0.0135	16.98	24.96	0.4167	0.0016	100.832		50.0591	47.3835	2.53601	0.0214043	100	0	1.48981	98.5102	100
	BF064_97SL65CPX_Di1	54.64	0.076	1.1808	0.0449	1.77	0.0039	16.68	24.9	0.4392	0	99.7701		50.31	46.8923	2.79143	0.00622942	100	0.0624558	1.51901	98.4185	100
	BF063_97SL65CPX_Di2	55.35	0.0374	0.9978	0.0414	1.55	0	16.85	24.95	0.594	0	100.403		50.2975	47.2636	2.43897	0	100	0.133961	1.98988	97.8762	100
	BF084_97SL65CPX_Di2	55.57	0.0429	1.1464	0.0283	1.75	0.0152	16.7	24.57	0.5906	0.0087	100.479		49.955	47.2434	2.77722	0.0244312	100	0	2.12677	97.8732	100
	BF064_97SL65CPX_Di3	54.81	0.0455	1.2131	0.0407	1.81	0.0157	16.69	24.48	0.631	0	99.761		49.8294	47.2696	2.87575	0.025264	100	0.445112	1.83651	97.7184	100
	BF079_97SL65CPX_Di4	55.3	0.0766	1.0916	0.0358	1.71	0	17.07	24.89	0.4121	0	100.619		49.804	47.5252	2.67076	0	100	0	1.47028	98.5297	100
	BF079_97SL65CPX_Di5	55.47	0.0196	1.1638	0.0185	1.72	0.032	16.94	24.59	0.6132	0.0005	100.588		49.6486	47.5897	2.71066	0.0510771	100	0	2.19138	97.8086	100
	97SL65CPX (average, n=8)	55.2613	0.0431875	1.1091	0.042175	1.69	0.0100375	16.8313	24.755	0.541338	0.00135	100.285		50.0091	47.31	2.66484	0.0160302	100	0	1.94058	98.0594	100
	%RSD	0.685083	52.2851	8.30614	38.6226	5.48735	112.524	0.897367	0.77763	18.4253	223.839			0.81628	1.31065	4.49601	93.3771	100	3.44511	23.374	73.1809	100
	BF063_97SL67CPX_Di1	55.04	0.0819	1.3781	0.095	1.87	0.0045	16.66	24.74	0.4948	0.0007	100.38		50.0974	46.9398	2.95566	0.0072037	100	0	1.78086	98.2191	100
	BF063_97SL67CPX_Di2	55.4	0.0306	0.852	0.1156	1.72	0	16.83	24.93	0.4399	0	100.347		50.1713	47.1268	2.70184	0	100	0	1.57679	98.4232	100
	BF063_97SL67CPX_Di3	54.1	0.083	2.65	0.1168	2.1	0.0298	16.56	23.46	0.7509	0.0394	99.9242		48.7083	47.8395	3.40324	0.0489125	100	0.862569	1.90497	97.2325	100
	BF063_97SL67CPX_Di4	55.61	0.0618	1.0557	0.0713	1.79	0.031	16.77	25.11	0.4356	0.0011	100.963		50.3556	46.7934	2.8019	0.0491463	100	0	1.5562	98.4438	100
	BF063_97SL67CPX_Di5	55.85	0.0209	0.9125	0.0319	1.75	0	16.93	24.64	0.534	0	100.718		49.7152	47.5288	2.75604	0	100	0	1.91246	98.0875	100
	BF063_97SL67CPX_Di6	55.52	0.0348	0.9977	0.0844	1.87	0.0214	16.79	24.78	0.461	0	100.605		49.9415	47.0827	2.94171	0.0340959	100	0	1.65352	98.3465	100
	97SL67CPX (average, n=6)	55.2533	0.0521667	1.30767	0.0858333	1.85	0.01445	16.7567	24.61	0.519367	0.00686667	100.456		49.8374	47.2152	2.92424	0.0231334	100	0	1.86775	98.1323	100
	%RSD	1.13069	51.9478	52.205	37.0298	7.40363	101.447	0.776881	2.38435	22.9705	232.203			2.66579	1.20854	6.46099	89.6647	100	4.61454	28.5784	66.8071	100
	BF063_CPX2501_Di1	54.9	0.1263	2.76	1.51	1.41	0.0543	15.33	21.54	1.86	0.0055	99.5455		48.9394	48.4625	2.50052	0.0975306	100	0	7.10414	92.8959	100
	BF063_CPX2501_Di2	54.88	0.1367	2.72	1.309	1.44	0.0577	15.53	21.66	1.79	0	99.5978		48.7421	48.6259	2.52934	0.102648	100	0	6.79409	93.2059	100
	BF063_CPX2501_Di3	55.08	0.0959	2.48	1.47	1.66	0.0246	16.16	20.97	1.68	0	99.6635		46.8393	50.2232	2.89413	0.0434385	100	0	6.35883	93.6412	100
	BF063_CPX2501_Di4	55.18	0.0886	2.7	1.4354	1.5	0.0375	15.38	21.77	1.9	0.0036	100.043		49.0645	48.2299	2.63875	0.0668142	100	0	7.19181	92.8082	100
	BF063_CPX2501_Di5	54.92	0.1089	2.68	1.48	1.51	0.0588	15.58	21.58	1.82	0.0031	99.7824		48.5128	48.7331	2.6496	0.104499	100	0	6.89359	93.1064	100
	BF063_CPX2501_Di6	54.96	0.0788	2.61	1.54	1.53	0.0436	15.64	21.85	1.78	0	100.032		48.7287	48.5312	2.66332	0.0768684	100	0	6.70215	93.2979	100
	CPX2501 (average, n=6)	54.9867	0.105867	2.65833	1.4574	1.50833	0.0460833	15.6033	21.5617	1.805	0.00203333	99.7347		48.4686	48.803	2.64651	0.0818936	100	0	6.84026	93.1597	100
	%RSD	0.215387	21.1532	3.77989	5.5545	5.77088	29.203	1.90492	1.44755	4.20104	116.41			4.56802	8.36416	14.2146	72.8532	100	12.9487	8.90536	78.1459	100
	BF063_GQ01-8OMP_Omp2	55.68	0.0384	7.08	0.0256	8.1	0.0183	8.25	13.86	6.21	0.0057	99.2875		43.7557	36.239	19.9597	0.045672	100	5.32452	22.2568	72.4187	100
	BF063_GQ01-8OMP_Omp3	54.48	0.0334	5.04	0	9.73	0.0055	8.82	15.33	5.29	0.0009	98.7298		43.5497	34.8628	21.5752	0.0123519	100	8.41969	14.761	76.8193	100
	BF063_GQ01-8OMP_Omp4	55.69	0.0215	7.12	0.0357	8.29	0	8.27	13.77	6.31	0.0008	99.508		43.3734	36.2448	20.3818	0	100	6.39322	21.7509	71.8559	100
	BF063_GQ01-8OMP_Omp5	55.33	0.0306	6.31	0	8.81	0	8.42	14.3	6.09	0	99.294		43.4754	35.6181	20.9065	0	100	8.04559	19.0702	72.8842	100
	BF063_GQ01-8OMP_Omp6	55.28	0.0268	6.4	0	8.57	0.0322	8.68	14.4	6.03	0	99.437		43.3839	36.3862	20.1532	0.076692	100	8.35835	18.4512	73.1904	100
	BF063_GQ01-8OMP_Omp7	54.59	0.0196	4.19	0.0141	10.67	0.0116	9.07	15.7	5.09	0.0031	99.3584		42.8288	34.4266	22.7195	0.0250163	100	9.87353	12.1905	77.936	100
	GQ01-8OMP (average, n=6)	55.175	0.0283833	6.02333	0.0125667	9.02833	0.0112667	8.585	14.56	5.83667	0.00175	99.2623		43.3836	35.5922	20.9976	0.0265392	100	7.74678	18.0456	74.2077	100
	%RSD	0.952355	25.2811	19.4625	122.305	10.9112	110.496	3.82143	5.4078	8.80757	128.222			5.07327	4.98821	7.98983	81.9487	100	7.46974	6.50942	86.0208	100
	BF062_NIJ-JD_Jd1-1	59.98	0	25.47	0	0	0.0017	0	0.0409	15.06	0.0133	100.585		96.8186	0	0	3.18136	100	0	99.8452	0.154767	100
	BF062_NIJ-JD_Jd1-1b	59.53	0.0029	25.29	0	0.1235	0	0	0.0657	14.91	0.0035	99.9317		40.5312	0	59.4688	0	100	0	99.4028	0.597184	100
	BF062_NIJ-JD_Jd1-2	59.94	0.0156	25.21	0.014	0.17	0.0475	0	0.1173	15.31	0.0119	100.836		40.7938	0	46.147	13.0592	100	0	98.9728	1.0272	100
	BF062_NIJ-JD_Jd1-2b	60.21	0.005	25.38	0.0027	0.0899	0.0167	0.01	0.1557	15.1	0.0055	101.001		61.5446	5.49987	27.737	5.2185	100	0	99.0827	0.917339	100
	BF062_NIJ-JD_Jd1-3	59.88	0	24.96	0	0	0.0128	0	0.0336	15.42	0	100.311		76.8544	0	0	23.1456	100	0	99.8436	0.156429	100
	BF062_NIJ-JD_Jd1-3b	59.89	0.0021	25.1	0.0027	0.106	0.0624	0.0074	0.1462	15.2	0.0105	100.527		50.6646	3.56812	28.6722	17.095	100	0	98.9618	1.03819	100
	BF062_NIJ-JD_Jd1-4	59.64	0.0276	24.44	0	0.486	0	0.1189	0.1691	15.26	0.003	100.16		23.6874	23.1743	53.1383	0	100	0.950658	97.4561	1.59329	100
	BF062_NIJ-JD_Jd1-4b	60.2	0.0311	24.89	0	0.0871	0.0428	0	0.1851	15.08	0.0067	100.561		64.5125	0	23.6949	11.7926	100	0	98.9595	1.04047	100
	BF062_NIJ-JD_Jd1-5	60.28	0	25.22	0.0014	0.0286	0.0245	0.0027	0.0746	15.31	0.0045	100.958		62.1414	3.12937	18.5954	16.1338	100	0	99.5686	0.431435	100
	NIJ-JD (average, n=9)	59.95	0.00936667	25.1067	0.00231111	0.121233	0.0231556	0.0154444	0.1098	15.1833	0.00654444	100.528		44.9589	8.79906	38.7466	7.49543	100	0	99.119	0.881023	100
	%RSD	0.425681	131.87	1.24114	196.19	122.274	98.9767	252.357	52.3304	1.04604	68.3182			9.06711	60.8389	16.5366	13.5574	100
	BF064_NRM-AG1_Cpx1-1	50.8	0.8381	3.15	0.0318	8.43	0.1919	13.98	21.36	0.3272	0	99.109		44.9273	40.9136	13.84	0.31909	100
	BF064_NRM-AG1_Cpx1-1W	50.31	0.8479	3.54	0.008	8.74	0.2056	13.97	21.46	0.3518	0.0064	99.4538		44.8182	40.595	14.2474	0.33945	100
	BF064_NRM-AG1_Cpx1-2	50.1	0.9198	3.54	0.029	8.7	0.2196	13.71	21.6	0.3366	0.0001	99.1882		45.3397	40.0417	14.2542	0.364406	100
	BF064_NRM-AG1_Cpx1-2S	50.6	0.9083	3.49	0.0207	8.54	0.2094	14.18	21.76	0.3086	0	100.053		45.0318	40.8308	13.7948	0.342583	100
	BF064_NRM-AG1_Cpx1-3	50.61	0.9632	3.5	0.0774	8.7	0.1936	13.91	21.88	0.3213	0.0018	100.176		45.4148	40.1724	14.0951	0.317675	100
	BF064_NRM-AG1_Cpx2-1	50.64	0.8823	3.1	0.0378	8.77	0.2401	14.1	21.44	0.3146	0	99.5555		44.5795	40.7925	14.2334	0.394667	100
	BF064_NRM-AG1_Cpx2-1E	50.58	0.8764	3.25	0.0627	8.61	0.2011	14.18	21.43	0.3608	0.0065	99.559		44.6091	41.0704	13.9895	0.330934	100
	BF064_NRM-AG1_Cpx2-2	50.13	0.945	3.51	0.0797	8.49	0.2168	13.94	21.76	0.3293	0.0093	99.453		45.3765	40.447	13.8191	0.357404	100
	BF064_NRM-AG1_Cpx2-2E	50.05	0.9398	3.75	0.0093	8.82	0.2081	13.83	21.42	0.3493	0	99.3765		44.8944	40.3317	14.4291	0.344805	100
	BF064_NRM-AG1_Cpx3-1	49.38	1.0528	3.96	0.0189	8.93	0.2179	13.48	21.51	0.3705	0.0081	98.9292		45.3716	39.5625	14.7026	0.363353	100
	BF064_NRM-AG1_Cpx3-1NEW	49.51	1.1267	4.33	0.0253	8.97	0.2166	13.65	21.74	0.3447	0.0013	99.9146		45.3812	39.6461	14.6153	0.35744	100
	BF064_NRM-AG1_Cpx3-2	49.46	1.0656	3.99	0.0513	8.8	0.1933	13.55	21.7	0.3235	0	99.1736		45.6122	39.6288	14.4378	0.321204	100
	BF064_NRM-AG1_Cpx3-3	49.64	1.1728	4.41	0.0213	9.05	0.1943	13.56	21.89	0.3202	0	100.269		45.628	39.3275	14.7242	0.320175	100
	BF064_NRM-AG1_Cpx3B-4B_1	49.89	1.0138	3.98	0.0379	8.81	0.2169	13.85	21.61	0.3272	0	99.7499		45.0876	40.2071	14.3475	0.357759	100
	BF064_NRM-AG1_Cpx4-1	50.52	0.8009	2.97	0.0223	8.65	0.2414	14.1	21.48	0.3199	0.0045	99.109		44.7116	40.8372	14.054	0.397238	100
	BF064_NRM-AG1_Cpx4-2	50.37	0.8235	3.17	0	8.47	0.2213	14.2	21.55	0.316	0.0048	99.1568		44.8081	41.0817	13.7465	0.363763	100
	BF064_NRM-AG1_Cpx5-1	49.52	1.0689	4.21	0.0425	8.87	0.2238	13.58	21.59	0.3264	0	99.453		45.3709	39.7078	14.5495	0.371803	100
	BF064_NRM-AG1_Cpx5-2	50.39	0.8829	3.41	0.0068	8.6	0.2029	13.91	21.69	0.3009	0	99.3935		45.2654	40.391	14.0089	0.334747	100
	BF064_NRM-AG1_Cpx5-3	50.75	0.8178	3.38	0.0107	8.68	0.215	14.11	21.6	0.3294	0.0021	99.9101		44.834	40.7504	14.0628	0.352793	100
	NRM-AG1 Cpx (average, n=19)	50.1711	0.944553	3.61263	0.0312316	8.71737	0.212084	13.8837	21.6037	0.330432	0.00236316	99.5091		45.1079	40.3348	14.2072	0.350075	100
	%RSD	0.951009	11.6658	11.8258	73.8856	1.97021	6.77789	1.69926	0.72407	5.42127	134.5			7.25194	23.6801	15.4023	53.6657	100	8.42323	45.3118	46.2649	100
	BF084_NRM-EN2_Opx1-2	57.53	0.0054	1.0464	0.4788	8.07	0.1914	33.09	0.2496	0	0.0063	100.745		0.473254	87.2966	11.9432	0.286893	100	0	0	100	100
	BF084_NRM-EN2_Opx2-2	57.57	0.0101	0.9695	0.4094	8	0.1876	33.38	0.3247	0	0.0051	100.913		0.610772	87.3644	11.7459	0.27897	100	0	0	100	100
	BF084_NRM-EN2_Opx3-1	57.48	0.0114	1.0292	0.4786	8.13	0.1709	32.94	0.2937	0.0019	0	100.615		0.558288	87.1222	12.0627	0.256818	100	0	0.00653535	99.9935	100
	BF064_NRM-EN2_Opx1-1	56.95	0.0074	1.0563	0.4119	8.04	0.1795	32.92	0.2959	0.0147	0.0076	99.9571		0.563424	87.217	11.9494	0.270199	100	0	0.0506264	99.9494	100
	BF064_NRM-EN2_Opx1-2	57.01	0.0086	1.068	0.4288	8.1	0.2097	32.87	0.287	0.0019	0	100.06		0.546558	87.0974	12.0403	0.315705	100	0	0.0065474	99.9935	100
	BF064_NRM-EN2_Opx1-3	56.95	0.0111	1.085	0.4594	8.12	0.1995	32.8	0.2985	0.0023	0.0004	99.998		0.569308	87.0418	12.0881	0.300797	100	0	0.00793754	99.9921	100
	BF064_NRM-EN2_Opx1-4	57.4	0.0208	1.0554	0.4627	8.04	0.1916	33.62	0.3186	0	0.003	101.178		0.595242	87.397	11.7247	0.28299	100	0	0	100	100
	BF064_NRM-EN2_Opx1-5	57.65	0.0127	1.0452	0.3614	8.12	0.1732	33.26	0.2713	0	0.0066	100.975		0.511654	87.277	11.9531	0.258228	100	0	0	100	100
	BF064_NRM-EN2_Opx2-1	56.88	0.0045	1.0937	0.4947	8.01	0.2169	32.75	0.294	0	0.0011	99.7961		0.562293	87.1521	11.9577	0.327947	100	0	0	100	100
	BF064_NRM-EN2_Opx2-2	56.66	0.0295	1.1224	0.487	8.01	0.2096	32.75	0.3178	0	0.0011	99.6405		0.607603	87.1221	11.9535	0.3168	100	0	0	100	100
	BF064_NRM-EN2_Opx2-3	56.77	0.0135	1.0716	0.4893	8.03	0.1829	32.95	0.3204	0.0058	0	99.9118		0.609365	87.195	11.9206	0.274996	100	0	0.0199579	99.98	100
	BF064_NRM-EN2_Opx2-4	56.75	0.0243	1.0447	0.4511	7.17	0.1652	30.97	3.17	0	0.0039	99.8063		6.09748	82.8864	10.7649	0.251206	100	0	0	100	100
	BF064_NRM-EN2_Opx2-5	57.53	0	1.0224	0.3675	8.03	0.1722	33.46	0.2422	0	0	100.874		0.455244	87.5078	11.781	0.255877	100	0	0	100	100
	BF064_NRM-EN2_Opx2-6	57.64	0.0241	1.1611	0.4974	8.24	0.2235	33.23	0.3249	0	0	101.42		0.611066	86.96	12.0966	0.33231	100	0	0	100	100
	BF064_NRM-EN2_Opx2-7	57.44	0.0092	1.0308	0.3886	8.13	0.1892	33.76	0.1716	0	0	101.186		0.319907	87.571	11.8303	0.278841	100
	NRM-EN2 Opx (average, n=15)	57.214	0.01284	1.06011	0.44444	8.016	0.19086	32.9833	0.47868	0.00177333	0.00234	100.404		0.906946	86.9524	11.8547	0.285877	100	0	0.0060798	99.9939	100
	%RSD	0.638163	64.5826	4.23	10.5138	3.029	9.33883	1.94432	155.771	221.022	120.698			92.5977	1.60817	1.40544	4.38869	100	0.417845	70.2695	29.3127	100
	BF084_NSH4CPX_Cpx1	50.13	1.0857	8.84	0	7.39	0.1109	13.81	17.04	1.72	0.0089	100.156		40.4644	45.6298	13.6977	0.208192	100	1.81636	5.19124	92.9924	100
	BF084_NSH4CPX_Cpx2	50.2	1.0585	8.83	0.002	7.29	0.1393	13.7	17.1	1.75	0	100.108		40.7507	45.4267	13.5602	0.262433	100	1.57383	5.55389	92.8723	100
	BF084_NSH4CPX_Cpx3	50.3	1.0528	8.78	0	7.2	0.1259	13.76	17.09	1.69	0.0005	100.036		40.734	45.6336	13.3951	0.23723	100	0.866291	5.98671	93.147	100
	BF084_NSH4CPX_Cpx4	50.37	1.0895	8.76	0	7.18	0.1164	13.66	17.14	1.71	0.0057	100.038		40.9628	45.4235	13.3937	0.219918	100	0.599992	6.32751	93.0725	100
	BF084_NSH4CPX_Cpx5	50.14	1.0486	8.73	0.0075	7.27	0.1454	13.77	17.01	1.75	0.0108	99.9077		40.5395	45.6625	13.5241	0.273947	100	1.7693	5.37267	92.858	100
	BF084_NSH4CPX_Cpx5-2	50.32	1.0754	8.72	0.0196	7.29	0.1532	13.78	16.9	1.73	0.0073	100.024		40.3488	45.7767	13.5853	0.289155	100	0.993188	6.03052	92.9763	100
	NSH4CPX (average, n=6)	50.2433	1.06842	8.77667	0.00485	7.27	0.13185	13.7467	17.0467	1.725	0.00553333	100.019		40.6332	45.5922	13.5262	0.248456	100	1.26859	5.74476	92.9866	100
	%RSD	0.20009	1.63561	0.570451	160.58	1.03301	12.727	0.405462	0.500067	1.35954	80.0802			4.19103	4.72817	6.75765	84.3231	100	5.93497	12.1741	81.8909	100
	BF084_NSH5CPX_Cpx1-2	51.01	0.7843	8.47	0	6.73	0.1075	15.06	16.46	1.54	0.0026	100.237		38.5007	49.0134	12.2872	0.198781	100	0.378912	5.76388	93.8572	100
	BF084_NSH5CPX_Cpx2	50.92	0.8292	8.34	0.0088	6.77	0.133	14.84	16.41	1.54	0.0114	99.8639		38.6593	48.6441	12.4489	0.247699	100	0	6.16083	93.8392	100
	BF084_NSH5CPX_Cpx3	51.17	0.8012	8.41	0.0196	6.76	0.1213	14.96	16.52	1.52	0.0092	100.323		38.6816	48.739	12.3549	0.224534	100	0	6.05089	93.9491	100
	BF084_NSH5CPX_Cpx4	51.1	0.8002	8.43	0.0027	6.68	0.1364	14.92	16.56	1.57	0.0054	100.257		38.8354	48.6841	12.2276	0.252877	100	0.178433	6.07931	93.7423	100
	BF084_NSH5CPX_Cpx5	51.11	0.7891	8.35	0.0115	6.7	0.1242	14.91	16.44	1.53	0.0092	100.006		38.67	48.7979	12.3011	0.230952	100	0	6.11438	93.8856	100
	BF084_NSH5CPX_Cpx5-2	50.9	0.8095	8.34	0.0183	6.76	0.1219	15.06	16.51	1.5	0	100.063		38.5412	48.9163	12.3175	0.224962	100	0.420453	5.56363	94.0159	100
	NSH5CPX (average, n=6)	51.035	0.80225	8.39	0.01015	6.73333	0.12405	14.9583	16.4833	1.53333	0.0063	100.076		38.6479	48.7994	12.3228	0.229935	100	0.0401113	6.07081	93.8891	100
	%RSD	0.214914	1.99384	0.652828	78.5581	0.545004	8.2109	0.5865	0.340314	1.52484	69.9206			4.21553	10.1086	5.2695	80.4064	100	4.08769	22.4274	73.4849	100
	BF084_NSH6CPX_Cpx1	50.51	0.9161	8.68	0.0128	6.84	0.1552	14.37	16.87	1.52	0.0076	99.9159		39.8573	47.239	12.6138	0.289876	100	0.131271	5.97887	93.8899	100
	BF084_NSH6CPX_Cpx2	50.23	0.9531	8.71	0	6.94	0.1385	14.37	16.98	1.53	0.0131	99.8647		39.9521	47.0446	12.7456	0.25762	100	1.15887	5.0281	93.813	100
	BF084_NSH6CPX_Cpx3	50.7	0.9189	8.72	0	6.88	0.1437	14.48	16.97	1.58	0.0138	100.442		39.8346	47.2931	12.6056	0.266663	100	0.858372	5.48507	93.6566	100
	BF084_NSH6CPX_Cpx4	50.64	0.9655	8.77	0.0128	6.93	0.1252	14.5	16.88	1.58	0.0018	100.43		39.6585	47.4005	12.7085	0.232539	100	0.762764	5.57994	93.6573	100
	BF084_NSH6CPX_Cpx4-2	50.6	0.9213	8.66	0.0095	6.79	0.128	14.38	16.92	1.58	0	99.9991		39.9722	47.2681	12.5206	0.239054	100	0.386284	5.96544	93.6483	100
	BF084_NSH6CPX_Cpx5	50.45	0.9486	8.7	0.0135	6.67	0.162	14.26	17.03	1.62	0.0166	99.8868		40.3501	47.0111	12.3354	0.30344	100	0.793337	5.75304	93.4536	100
	NSH6CPX (average, n=6)	50.5217	0.93725	8.70667	0.0081	6.84167	0.1421	14.3933	16.9417	1.56833	0.00881667	100.07		39.9369	47.2096	12.5886	0.264814	100	0.681305	5.63219	93.6865	100
	%RSD	0.333898	2.24646	0.43382	79.3434	1.47738	10.2829	0.605152	0.36846	2.36579	77.2947			3.51156	8.02462	10.9901	77.4738	100	8.46619	22.9651	68.5687	100
	BF084_NSH7CPX_Cpx1	49.22	1.5266	9.34	0	8.3	0.1139	11.9	17.52	2.06	0	100.002		43.1037	40.736	15.9388	0.22153	100	2.52088	6.09183	91.3873	100
	BF084_NSH7CPX_Cpx2	49.36	1.5356	9.46	0.0108	8.12	0.1095	11.87	17.45	2.01	0.0079	99.947		43.2033	40.8905	15.6919	0.21432	100	1.23301	7.13034	91.6367	100
	BF084_NSH7CPX_Cpx3	49.17	1.5064	9.44	0	8.25	0.1412	11.93	17.41	2.03	0.0071	99.9086		42.9235	40.925	15.8763	0.275207	100	2.25288	6.23901	91.5081	100
	BF084_NSH7CPX_Cpx3-1	49.26	1.5028	9.47	0.0088	8.25	0.1579	11.93	17.54	2.04	0.0065	100.166		43.0919	40.781	15.8204	0.306674	100	2.47222	6.04873	91.479	100
	BF084_NSH7CPX_Cpx4	49.17	1.487	9.39	0.0156	8.14	0.114	11.93	17.45	2.04	0.0116	99.7526		43.0937	40.993	15.6907	0.222562	100	2.23927	6.30283	91.4579	100
	BF084_NSH7CPX_Cpx5	49.32	1.5002	9.4	0	8.25	0.139	11.94	17.4	2.11	0.014	100.079		42.8966	40.9571	15.8754	0.270905	100	2.65319	6.17857	91.1682	100
	NSH7CPX (average, n=6)	49.25	1.50977	9.41667	0.00586667	8.21833	0.12925	11.9167	17.4617	2.04833	0.00785	99.9644		43.052	40.8803	15.8158	0.251922	100	2.22773	6.33253	91.4397	100
	%RSD	0.159362	1.1924	0.523128	115.842	0.868679	15.1491	0.223076	0.326814	1.67466	61.3307			2.45885	2.33525	5.10138	90.1045	100	4.33426	15.0376	80.6281	100
	BF084_NSH9CPX_Cpx1	50.75	0.8972	8.54	0.0033	6.78	0.1341	14.81	16.56	1.57	0.0024	100.073		38.9055	48.4124	12.4331	0.249062	100	0.566196	5.72639	93.7074	100
	BF084_NSH9CPX_Cpx2	50.68	0.8994	8.79	0.0061	6.72	0.108	14.7	16.53	1.56	0.0031	100.039		39.0649	48.3373	12.396	0.201774	100	0.0762327	6.18284	93.7409	100
	BF084_NSH9CPX_Cpx3	50.62	0.8911	8.75	0.004	6.84	0.1353	14.75	16.64	1.52	0.0049	100.171		39.0528	48.1661	12.5301	0.251029	100	0.555416	5.54232	93.9023	100
	BF084_NSH9CPX_Cpx4	50.45	0.9244	8.6	0.002	6.76	0.1423	14.75	16.55	1.59	0.0032	99.8192		38.976	48.3328	12.4264	0.26493	100	1.08855	5.32668	93.5848	100
	BF084_NSH9CPX_Cpx5_4S	50.66	0.9053	8.71	0	6.76	0.1153	14.59	16.64	1.47	0.0077	99.8803		39.3305	47.9825	12.4716	0.215444	100	0	5.91562	94.0844	100
	BF084_NSH9CPX_Cpx6_4E	50.65	0.891	8.69	0	6.83	0.1337	14.75	16.6	1.6	0.0096	100.165		39.0038	48.2217	12.5262	0.248347	100	1.05439	5.38255	93.5631	100
	NSH9CPX (average, n=6)	50.635	0.9014	8.68	0.00256667	6.78167	0.128117	14.725	16.5867	1.55167	0.00515	99.9972		39.0553	48.2422	12.464	0.238482	100	0.455245	5.77459	93.7702	100
	%RSD	0.198575	1.38571	1.08074	93.1378	0.675194	10.406	0.507751	0.284491	3.14185	56.2336			2.91952	7.25011	5.40841	84.422	100	3.53633	34.6143	61.8494	100
	BF063_P260OMP_Omp1	56.53	0.0388	10.02	0.0837	4.64	0.0162	8.38	13.3	6.78	0.0071	99.7958		46.5125	40.7768	12.6659	0.044788	100	0.890441	29.4018	69.7078	100
	BF063_P260OMP_Omp2	56.4	0.0403	9.72	0.1308	4.49	0.0257	8.74	13.79	6.55	0	99.9098		46.7842	41.257	11.8899	0.0689281	100	1.2567	27.7836	70.9597	100
	BF063_P260OMP_Omp3	56	0.028	8.72	0.0273	5.01	0	9.17	14.65	5.96	0	99.5824		46.7758	40.7384	12.4859	0	100	1.45394	24.5339	74.0121	100
	BF063_P260OMP_Omp4	56.03	0.0644	8.37	0	5.07	0.0034	9.33	14.86	5.9	0	99.6464		46.7269	40.8208	12.4439	0.00845192	100	1.95578	23.6704	74.3739	100
	BF063_P260OMP_Omp5	56.38	0.0524	9.69	0.0497	4.39	0.0095	8.8	13.67	6.54	0.0011	99.5984		46.5784	41.7205	11.6756	0.0255898	100	0.887176	28.105	71.0078	100
	BF063_P260OMP_Omp6	55.99	0.0493	9.49	0.1668	4.62	0	8.82	13.87	6.59	0.0011	99.6168		46.6246	41.2533	12.1221	0	100	3.2433	26.3011	70.4556	100
	P260OMP (average, n=6)	56.2217	0.0455333	9.335	0.0763833	4.70333	0.00913333	8.87333	14.0233	6.38667	0.00155	99.6759		46.6697	41.0886	12.2177	0.0240293	100	1.6132	26.6137	71.7731	100
	%RSD	0.429455	27.7353	6.90421	83.1008	5.88551	112.111	3.7915	4.30079	5.71078	178.827			4.18368	5.13183	4.46882	86.2157	100	4.23247	5.28882	90.4787	100
	BF063_QJH01-1OMP_Omp1	54.14	0.0827	5.7	0.0141	11.2	0.0088	7.92	14.76	5.41	0.003	99.2386		42.7468	31.9149	25.3182	0.0201478	100	8.64599	15.3539	76.0001	100
	BF084_QJH01-1OMP_Omp1	54.72	0.0761	6.17	0	9.73	0	8.38	15.17	5.24	0	99.5081		44.0673	33.8708	22.0619	0	100	5.43526	17.3352	77.2295	100
	BF065_QJH01-1OMP_Omp2	54.45	0.0917	6.4	0	9.81	0	8.18	15.01	5.37	0	99.3288		44.0838	33.4274	22.4888	0	100	6.31365	17.2917	76.3946	100
	BF063_QJH01-1OMP_Omp2	54.19	0.0779	5.68	0.006	11.26	0.0127	7.82	15.1	5.31	0.0075	99.4797		43.4161	31.2847	25.2703	0.0288673	100	8.25045	15.1832	76.5664	100
	BF084_QJH01-1OMP_Omp2	54.54	0.0935	5.35	0	11.24	0.0255	8.1	14.98	5.29	0.0009	99.6199		42.7465	32.1606	25.0353	0.0575251	100	7.78237	15.3433	76.8743	100
	BF065_QJH01-1OMP_Omp3-2	54.15	0.0863	5.33	0.0288	11.1	0	8.45	15.41	5.08	0	99.6351		43.007	32.8129	24.1801	0	100	8.73243	13.4682	77.7994	100
	BF064_QJH01-1OMP_Omp6	53.89	0.0836	5.62	0	10.75	0	8.2	14.99	5.4	0	98.9336		43.0867	32.7949	24.1184	0	100	9.80084	14.2772	75.922	100
	BF064_QJH01-1OMP_Omp7	53.95	0.0892	5.85	0.0335	9.94	0.0033	8.52	15.35	5.1	0	98.8365		43.8999	33.9036	22.1891	0.007461	100	7.30208	15.1055	77.5925	100
	QJH01-1OMP (average, n=8)	54.2537	0.085125	5.7625	0.0103	10.6288	0.0062875	8.19625	15.0962	5.275	0.001425	99.3156		43.3779	32.7692	23.8386	0.0142826	100	7.77537	15.4233	76.8014	100
	%RSD	0.5352	7.33916	6.45441	134.217	6.44784	145.222	3.02528	1.40204	2.42137	187.204			1.11761	3.35542	4.01184	91.5151	100
	BF063_QLP08-1OMP_Omp1	56.37	0.0337	8.96	0.017	6.03	0.0228	8.57	13.38	6.76	0.0056	100.185		44.557	39.7092	15.6738	0.0600236	100	4.6352	25.6523	69.7125	100
	BF064_QLP08-1OMP_Omp1	55.31	0.0518	7.37	0.0055	6.53	0.0508	9.15	14.71	5.82	0.012	99.0209		45.1526	39.0789	15.6452	0.123271	100	4.89392	20.732	74.374	100
	BF084_QLP08-1OMP_Omp11	56.4	0.0484	8.38	0.0469	6.33	0.0396	8.66	14.19	6.15	0.0067	100.283		45.4638	38.6058	15.8302	0.100301	100	1.95375	24.8446	73.2017	100
	BF084_QLP08-1OMP_Omp12	56.34	0.0337	7.83	0.0183	6.11	0.0179	9.15	14.29	6.15	0.0022	99.9862		44.9307	40.0297	14.9951	0.044493	100	3.52003	23.3142	73.1657	100
	BF065_QLP08-1OMP_Omp2	55.42	0.03	6.13	0.0088	6.84	0.0235	10.1	16.42	4.99	0.001	99.9771		45.8267	39.2209	14.9005	0.0518492	100	5.0241	16.1163	78.8596	100
	BF063_QLP08-1OMP_Omp2	56.12	0.0224	8.55	0.0523	5.45	0.0151	9.03	14.1	6.24	0.0007	99.582		45.5865	40.6215	13.7535	0.0385942	100	2.72736	24.7464	72.5262	100
	BF065_QLP08-1OMP_Omp3	55.99	0.0487	8.35	0.0402	6.39	0	8.74	13.88	6.32	0.0005	99.7865		44.7331	39.1924	16.0745	0	100	3.94376	24.0506	72.0057	100
	BF064_QLP08-1OMP_Omp5	55.98	0.0398	9.42	0.0034	5.67	0	8.5	12.96	6.84	0	99.4161		44.3645	40.4856	15.15	0	100	4.23989	26.7833	68.9768	100
	QLP08-1OMP (average, n=8)	55.9913	0.0385625	8.12375	0.02405	6.16875	0.0212125	8.9875	14.2413	6.15875	0.0035875	99.7587		45.0984	39.6007	15.2478	0.0531047	100	3.86695	23.2284	72.9046	100
	%RSD	0.751479	26.9873	12.5771	81.1589	7.36293	82.9935	5.75509	7.27097	9.38602	117.257			8.39255	9.24282	6.63362	75.731	100	5.87194	11.4822	82.6459	100
	BF063_TP03-2OMP_Omp1	56.21	0.0296	9.03	0	8.94	0.0094	6.81	10.53	7.89	0	99.4935		39.0131	35.1059	25.8534	0.027532	100	8.01632	29.3545	62.6292	100
	BF063_TP03-2OMP_Omp2	56.11	0.0251	8.99	0.0301	9.17	0.0028	6.65	10.3	8.02	0.0044	99.3024		38.5586	34.6383	26.7949	0.00828648	100	8.87886	29.4511	61.6701	100
	BF063_TP03-2OMP_Omp3	56.11	0.0281	9.2	0.0268	8.88	0.0094	6.61	10.27	7.98	0.0004	99.1352		38.893	34.83	26.2489	0.0281421	100	7.63859	30.4157	61.9457	100
	BF063_TP03-2OMP_Omp4	56.15	0.0267	9.36	0	9.31	0.015	6.25	9.67	8.47	0.0012	99.2529		37.7072	33.9101	28.3365	0.0462399	100	10.4509	30.868	58.681	100
	BF063_TP03-2OMP_Omp5	56.54	0.0237	9.36	0	9.01	0.0172	6.57	9.93	8.33	0.0025	99.7834		38.0201	35.001	26.9269	0.0520619	100	9.23988	30.7364	60.0237	100
	BF063_TP03-2OMP_Omp7	55.35	0.0376	8.85	0.0348	9.84	0.0067	6.47	10.62	7.81	0	99.044		38.8894	32.9657	28.1255	0.0193959	100	10.3519	27.2826	62.3655	100
	TP03-2OMP (average, n=6)	56.0783	0.0284667	9.13167	0.0152833	9.19167	0.0100833	6.56	10.22	8.08333	0.00141667	99.3202		38.5224	34.4046	27.043	0.0300465	100	9.08748	29.683	61.2295	100
	%RSD	0.698915	17.3533	2.2902	110.801	3.85655	52.5242	2.87136	3.53228	3.21237	122.947			6.78493	7.67414	5.78213	79.7588	100	5.48672	5.109	89.4043	100
	BF062_95AK24 (or UWC3CPX)_Di1-1	53.59	0.0818	1.1004	0	4.56	0.2472	15.39	24.95	0.1403	0	100.06		49.7822	42.7261	7.10177	0.389924	100
	BF084_95AK24 (or UWC3CPX)_Di1-2	54.15	0.0949	1.2813	0	4.48	0.251	15.16	24.85	0.1196	0.0028	100.391		50.0616	42.4941	7.04457	0.399742	100	0	0.434119	99.5659	100
	BF062_95AK24 (or UWC3CPX)_Di2-2	53.59	0.0955	1.3294	0	4.47	0.2183	15.32	24.86	0.1309	0.0023	100.031		49.8818	42.7711	7.00079	0.346276	100	0.46555	0.00970601	99.5247	100
	BF063_95AK24 (or UWC3CPX)_Di2-3 red	53.57	0.1275	1.3859	0	4.57	0.2496	15.04	24.86	0.1587	0	99.9642		50.1705	42.2324	7.19883	0.398217	100	0.0734817	0.503182	99.4233	100
	BF064_95AK24 (or UWC3CPX)_Di3	53.7	0.0922	1.2501	0.0069	4.41	0.2156	15.14	25.02	0.1082	0.0009	99.9654		50.3437	42.3872	6.92619	0.342953	100	0	0.392434	99.6076	100
	BF062_95AK24 (or UWC3CPX)_Di3-3	53.58	0.1376	1.5384	0.0069	4.59	0.2181	15.01	24.78	0.149	0.0052	100.016		50.1417	42.26	7.24951	0.348884	100	0	0.542638	99.4574	100
	BF084_95AK24 (or UWC3CPX)_Di4	54.2	0.1167	1.4124	0.0034	4.79	0.2275	14.94	24.93	0.1256	0.0004	100.746		50.2255	41.8797	7.53245	0.362336	100	0	0.455824	99.5442	100
	BF064_95AK24 (or UWC3CPX)_Di4	53.62	0.1222	1.3203	0	4.54	0.2378	14.87	24.73	0.1387	0.0029	99.6015		50.3136	42.0943	7.20967	0.382473	100	0	0.50806	99.4919	100
	BF063_95AK24 (or UWC3CPX)_Di4-10	53.61	0.1084	1.3897	0	4.59	0.2004	15.05	24.88	0.1343	0	99.9628		50.2001	42.2515	7.22878	0.319654	100	0	0.487972	99.512	100
	95AK24 (or UWC3CPX) Cpx (average, n=9)	53.7344	0.108533	1.33421	0.00191111	4.55556	0.2295	15.1022	24.8733	0.133922	0.00161111	100.075		50.1238	42.345	7.16556	0.365613	100	0	0.486	99.514	100
	%RSD	0.470719	17.2228	9.1149	159.044	2.35429	7.77607	1.1236	0.350488	11.3553	112.302			3.54069	15.7935	18.5641	62.1017	100	6.42304	65.4007	28.1762	100
	BF063_XHD07-1OMP_Omp2	56.44	0.0837	10.76	0.0429	4.16	0.0346	8.28	13.53	6.56	0	99.9108		47.7667	40.6732	11.4635	0.0965676	100	0	29.5329	70.4671	100
	BF063_XHD07-1OMP_Omp3	56.26	0.1098	10.98	0.0355	4.45	0.0391	8.26	13.61	6.62	0.0055	100.37		47.5753	40.1749	12.1418	0.108051	100	0	29.5162	70.4838	100
	BF063_XHD07-1OMP_Omp4	55.98	0.1376	10.84	0.0341	4.76	0.0195	8.23	13.63	6.42	0	100.071		47.3067	39.7445	12.8953	0.0535044	100	0	28.7357	71.2643	100
	BF063_XHD07-1OMP_Omp5	55.87	0.1463	10.92	0.0701	4.64	0.0145	8.3	13.81	6.32	0.002	100.127		47.6342	39.834	12.4923	0.0395386	100	0	28.289	71.711	100
	BF063_XHD07-1OMP_Omp7	56.3	0.0932	11.08	0.1196	3.88	0.0084	8.31	13.2	6.74	0	99.742		47.486	41.5952	10.8949	0.0238891	100	0	30.4964	69.5036	100
	BF063_XHD07-1OMP_Omp9	56.54	0.0869	11.47	0.0798	4.03	0.0089	8.07	13.21	6.79	0.0047	100.29		47.8776	40.6962	11.4007	0.0255004	100	0	30.812	69.188	100
	XHD07-1OMP (average, n=6)	56.2317	0.109583	11.0083	0.0636667	4.32	0.0208333	8.24167	13.4983	6.575	0.00203333	100.071		47.6061	40.4435	11.8923	0.0580858	100	0	29.5592	70.4408	100
	%RSD	0.46243	24.4385	2.28688	52.2308	8.12629	63.0272	1.07822	1.81491	2.76078	123.507			3.05109	2.52207	10.6632	83.7636	100
	BF063_XHD23-1OMP_Omp1	56.33	0.0514	10.46	0	7.66	0.01	6.34	10.65	8.17	0.0058	99.6772		41.8331	34.6505	23.4854	0.0310526	100	6.4265	32.673	60.9005	100
	BF063_XHD23-1OMP_Omp2	56.46	0.0547	10.4	0	7.87	0.0156	6.19	10.64	8.14	0	99.8206		41.8766	33.8978	24.177	0.0485381	100	5.61415	33.1452	61.2407	100
	BF063_XHD23-1OMP_Omp3	56.41	0.0295	9.82	0.002	7.43	0	6.93	11.1	7.94	0.001	99.6625		41.8208	36.329	21.8502	0	100	6.81565	30.7	62.4844	100
	BF063_XHD23-1OMP_Omp4	56.63	0.0155	9.99	0.0007	7.33	0	6.85	10.93	7.93	0.0099	99.7091		41.7455	36.4025	21.852	0	100	5.30109	31.98	62.7189	100
	BF063_XHD23-1OMP_Omp5	56.47	0.0333	9.82	0.0155	7.63	0	6.88	11.02	7.92	0	99.7913		41.5091	36.058	22.4329	0	100	6.4679	30.8585	62.6736	100
	BF063_XHD23-1OMP_Omp6	56.61	0.029	10.38	0.0013	6.91	0.0162	6.7	10.87	8.17	0	99.6992		42.463	36.4173	21.0697	0.0500293	100	6.07006	32.763	61.167	100
	XHD23-1OMP (average, n=6)	56.485	0.0355667	10.145	0.00325	7.47167	0.00696667	6.64833	10.8683	8.045	0.00278333	99.7119		41.8717	35.6386	22.4685	0.0212183	100	6.11539	32.0158	61.8688	100
	%RSD	0.205166	41.7886	2.97269	186.175	4.46502	113.858	4.66759	1.74715	1.57377	149.15			1.71732	6.38358	3.42564	88.4735	100
	Session-210617
	BF106_NIJ-JD_Jd-1.1	59.19	0.0026	25.28	0.0224	0.02	0.0119	0.0017	0.022	14.95	0	99.5006		44.549	4.78978	31.6114	19.0498	100	0	99.8178	0.182206	100
	BF106_NIJ-JD_Jd-1.2	59.19	0.0163	25.3	0	0.0204	0	0	0.022	14.93	0.0077	99.4864		58.0121	0	41.9879	0	100	0	99.8598	0.140167	100
	BF106_NIJ-JD_Jd-2.1	59.25	0.0129	25.27	0.0081	0.0125	0	0	0.0101	14.9	0	99.4636		50.8641	0	49.1359	0	100	0	99.9264	0.0735893	100
	BF106_NIJ-JD_Jd-2.2	59.19	0.047	25.37	0	0.0229	0	0	0.0339	14.93	0.0026	99.601		65.4763	0	34.5237	0	100	0	99.8087	0.191265	100
	BF106_NIJ-JD_Jd-3.1	59.08	0	25.23	0	0.0229	0	0.0095	0.0332	14.98	0.0012	99.3568		51.6388	20.5595	27.8017	0	100	0	99.7634	0.23661	100
	BF106_NIJ-JD_Jd-3.2	58.76	0.0398	25.34	0	0.0504	0.0261	0	0.0647	15.03	0.0007	99.3123		51.8958	0	31.5542	16.55	100	0	99.5437	0.456286	100
	NIJ-JD (average, n=6)	59.11	0.0197667	25.2983	0.00508333	0.02485	0.00633333	0.00186667	0.0309833	14.9533	0.00203333	99.4526		53.4343	4.4793	33.4516	8.6348	100	0	99.7862	0.213821	100
	%RSD	0.304705	98.2955	0.199086	178.644	52.6611	170.373	203.618	60.3429	0.306945	144.515			11.6167	54.5412	7.91307	25.929	100
	BF064_NRM-AG1_Cpx-1.1	49.36	0.9114	3.58	0.0097	8.7	0.1985	13.8	21.49	0.3654	0.0009	98.4295		45.1102	40.3058	14.2546	0.329402	100
	BF064_NRM-AG1_Cpx-1.3	47.83	1.2496	4.51	0.0363	9.07	0.2111	13.16	21.66	0.3292	0	98.063		45.8731	38.7799	14.9936	0.35344	100
	BF064_NRM-AG1_Cpx-2.1	49.4	0.8896	3.18	0.0258	8.58	0.1953	13.93	21.55	0.3008	0.003	98.0652		45.0991	40.5623	14.0154	0.323111	100
	NRM-AG1 Cpx (average, n=3)	48.8633	1.01687	3.75667	0.0239333	8.78333	0.201633	13.63	21.5667	0.3318	0.0013	98.1755		45.359	39.8866	14.4191	0.335252	100
	%RSD	1.83188	19.8499	18.1643	55.98	2.90787	4.14269	3.02413	0.399769	9.75841	118.422			3.93773	41.4466	22.3569	32.2588	100	8.88639	60.2521	30.8615	100
	BF117_MB04-8CPX_7A_Px-ex-21	49.83	0.2419	2.52	0.0439	12.84	0.264	10.75	21.88	0.4415	0	98.8113		46.4855	31.7782	21.2928	0.443407	100
	BF117_MB04-8CPX_7A_Px-ex-22	49.72	0.3041	2.62	0.0193	13.21	0.3092	10.86	21.24	0.4342	0	98.7279		45.282	32.2146	21.9823	0.521122	100
	BF117_MB04-8CPX_7B_Cpx-426	49.59	0.2279	2.37	0.0165	15.39	0.3524	10.77	19.71	0.3634	0.0006	98.7934		41.9482	31.8928	25.566	0.592913	100
	BF116_MB04-8CPX_7BA_Px-12	49.74	0.1851	2.28	0.029	16.68	0.4851	10.91	18.33	0.3129	0.006	98.965		39.0722	32.358	27.7524	0.817457	100
	BF116_MB04-8CPX_7BA_Px-414	50.32	0.1736	1.8887	0.0061	12.74	0.3588	10.83	21.87	0.3923	0.0031	98.5898		46.3675	31.9481	21.083	0.601375	100
	BF116_MB04-8CPX_7BB_Px-16	49.4	0.2897	2.8	0.0219	13.58	0.4273	10.15	21.28	0.4071	0.0004	98.3564		45.9212	30.476	22.8739	0.728958	100
	BF116_MB04-8CPX_7BB_Px-418	49.87	0.1939	2.07	0.0257	14.96	0.494	10.78	19.71	0.3401	0	98.4499		42.1363	32.0656	24.9632	0.834882	100
	BF116_MB04-8CPX_7BB_Px-ex-419	48.98	0.1545	2.12	0.0271	21.37	0.6604	11.76	13.1	0.2559	0	98.4331		28.0723	35.0643	35.7446	1.11877	100					outlier; rejected
	BF117_MB04-8CPX_7C_Cpx-ex-28	49.71	0.2464	2.43	0.0349	13.05	0.3998	10.37	21.83	0.4379	0.0033	98.5153		46.6842	30.8565	21.7834	0.675908	100
	BF117_MB04-8CPX_7C_Cpx-ex-433	50.51	0.1721	1.8268	0.0113	14.3	0.4569	10.98	20.36	0.3742	0	98.9913		43.1717	32.3947	23.6677	0.765897	100
	MB04-8CPX (average, n=9 out of 10)	49.8544	0.226078	2.31172	0.0231778	14.0833	0.394167	10.7111	20.69	0.389289	0.00148889	98.6848		44.1173	31.7785	23.4397	0.664441	100
	%RSD	0.700546	21.6604	14.2468	50.6165	9.6251	20.1485	2.53344	6.00715	11.6961	144.576			18.2182	10.6905	22.7846	48.3067	100	16.1129	29.2814	54.6057	100
	BF117_MB04-8OPX_7B_Cpx-431	49.82	0.0521	0.6169	0.0153	30.93	0.6512	15.87	0.8108	0.0057	0.0006	98.7726		1.70518	46.439	50.7731	1.08267	100
	BF117_MB04-8OPX_7B_Opx-26	49.43	0.0596	0.7917	0.0129	31.22	0.6125	15.92	0.5154	0.0129	0.0021	98.5861		1.08461	46.6148	51.2816	1.01898	100
	BF117_MB04-8OPX_7B_Px-427	50.02	0.0448	0.4597	0	31.42	0.6058	15.74	0.4493	0.0057	0.0015	98.7468		0.94882	46.2491	51.7907	1.01136	100
	BF117_MB04-8OPX_7B_Px-428	49.59	0.0285	0.572	0.002	31.67	0.5758	15.57	0.4765	0.0161	0	98.5193		1.00707	45.7862	52.2447	0.962045	100
	BF117_MB04-8OPX_7C_Opx-434	48.83	0.0563	1.1668	0.006	32.46	1.0277	14.44	0.6442	0.029	0.002	98.6691		1.374	42.8534	54.0398	1.73285	100
	BF117_MB04-8OPX_7C_Opx-435	48.76	0.0361	0.8526	0.0084	32.17	1.0178	14.74	0.5575	0.008	0	98.1694		1.18664	43.6538	53.4469	1.71263	100
	BF117_MB04-8OPX_7C_Opx-436	49.09	0.0678	1.096	0.01	32.24	1.0072	14.68	0.5238	0.0064	0.0021	98.7233		1.11659	43.5418	53.6442	1.69736	100
	BF117_MB04-8OPX_7C_Opx-437	48.83	0.0665	1.0409	0.0124	32.47	1.0141	14.53	0.5925	0	0.0018	98.5582		1.26183	43.0556	53.9752	1.70735	100
	BF117_MB04-8OPX_7C_Opx-438	49.22	0.0423	0.8007	0.0044	32.31	0.9859	14.76	0.6141	0	0.0043	98.7417		1.30244	43.5568	53.4877	1.65303	100
	MB04-8OPX (average, n=9)	49.2878	0.0504444	0.821922	0.00793333	31.8767	0.833111	15.1389	0.576011	0.00931111	0.0016	98.6037		1.22088	44.6464	52.7367	1.39596	100
	%RSD	0.927641	26.8296	29.8025	65.761	1.81464	25.3926	4.08814	18.8385	97.275	83.0333			40.938	12.3611	3.07799	43.623	100	0.641977	79.143	20.215	100
	Session-220708 (Grt-std?)
	BF125_97SL65_Di1	54.48	0.0596	0.7286	0.0445	1.58	0.029	17.1	24.85	0.4225	0.0012	99.314		49.8005	47.682	2.47151	0.0459445	100	1.0785	0.446884	98.4746	100
	BF125_97SL65_Di2	54.68	0.0541	0.7252	0.033	1.63	0.0037	17.11	24.89	0.4433	0	99.5864		49.8079	47.6403	2.546	0.00585333	100	1.00083	0.59493	98.4042	100
	BF125_97SL65_Di3	54.56	0.0352	0.6313	0.0255	1.56	0	17.26	24.79	0.417	0.0039	99.3064		49.5571	48.0088	2.43418	0	100	1.18293	0.320759	98.4963	100
	BF125_97SL65_Di4	54.33	0.0473	0.7588	0.0247	1.64	0	17.05	24.8	0.5161	0	99.2114		49.7958	47.6339	2.5703	0	100	1.86607	0.00902737	98.1249	100
	BF125_97SL65_Di5	54.64	0.0266	0.7155	0.0148	1.53	0.0068	17.05	24.76	0.4939	0	99.2484		49.836	47.7494	2.40371	0.0108201	100	0.9054	0.877768	98.2168	100
	97SL65CPX (average, n=5)	54.538	0.04456	0.71188	0.0285	1.588	0.0079	17.114	24.818	0.45856	0.00102	99.3104		49.7593	47.743	2.48517	0.0125217	100	1.20579	0.450482	98.3437	100
	%RSD	0.25552	30.4184	6.72392	38.731	2.93345	153.588	0.503666	0.208204	9.64234	165.857			0.167075	0.562362	1.83739	97.4332	100	1.63811	10.8454	87.5165	100
	BF064_NRM-EN2_Opx1-1	56.48	0.0101	0.6669	0.4953	7.63	0.1483	33.04	1.2384	0	0.0033	99.7629		2.3242	86.2785	11.1772	0.22003	100
	BF064_NRM-EN2_Opx1-2	56.48	0.0113	0.6298	0.4755	7.75	0.1428	33.32	0.348	0	0.0065	99.2504		0.6582	87.6869	11.4414	0.213518	100
	BF064_NRM-EN2_Opx2-1	55.86	0.0228	0.6838	0.4256	7.54	0.1567	33.06	1.2878	0.0035	0	99.1158		2.41629	86.3087	11.0426	0.232433	100
	BF064_NRM-EN2_Opx2-2	56.31	0.0309	0.6823	0.4934	7.77	0.1684	33.96	0.2668	0	0.0031	99.7414		0.496681	87.965	11.2904	0.247834	100
	BF064_NRM-EN2_Opx2-3	56.39	0.0203	0.6893	0.5182	7.7	0.158	33.72	0.3047	0.009	0.0005	99.6048		0.571052	87.9309	11.264	0.234093	100
	BF106_NRM-EN2_Opx1-1	56.03	0.0109	0.6232	0.4549	7.76	0.131	33.77	0.3506	0.0005	0.0083	99.1959		0.655344	87.8292	11.3218	0.193578	100
	BF106_NRM-EN2_Opx2-1	56.07	0.0245	0.5717	0.3279	7.45	0.1562	33.86	0.3533	0.013	0	98.8855		0.661554	88.2185	10.8887	0.231223	100
	BF106_NRM-EN2_Opx3-1	56.23	0.0387	0.6165	0.4382	7.69	0.1825	33.78	0.3456	0.0112	0	99.3759		0.646058	87.8635	11.2208	0.269705	100
	NRM-EN2 OPX (average, n=8)	56.2312	0.0211875	0.645437	0.453625	7.66125	0.155488	33.5637	0.5619	0.00465	0.0027125	99.3012		1.05293	87.511	11.2057	0.230338	100
	%RSD	0.403009	48.59	6.47571	13.1211	1.4971	10.0725	1.09528	77.2387	119.173	119.077			87.8771	1.73386	1.32951	9.05952	100	0.386448	70.9329	28.6806	100
	BF064_95AK24 (or UWC3CPX)_Di1	52.85	0.0815	0.849	0.0114	4.4	0.1934	15.34	24.72	0.1005	0	98.5458		49.7872	42.9878	6.91704	0.307931	100
	BF064_95AK24 (or UWC3CPX)_Di2	52.62	0.1085	0.9087	0	4.44	0.1897	15.34	24.73	0.1249	0	98.4696		49.769	42.9547	6.97454	0.301807	100
	BF064_95AK24 (or UWC3CPX)_Di3	52.59	0.109	0.8148	0.0179	4.26	0.1714	15.43	24.81	0.1058	0	98.3089		49.8795	43.1631	6.68503	0.272417	100
	BF064_95AK24 (or UWC3CPX)_Di4	53.04	0.1141	0.8824	0.005	4.4	0.2168	15.34	24.78	0.1064	0.0014	98.8876		49.8293	42.92	6.90612	0.344644	100
	BF064_95AK24 (or UWC3CPX)_Di8	52.4	0.1132	0.8574	0.0156	4.29	0.1769	15.62	24.46	0.099	0.0029	98.035		49.2331	43.7454	6.73995	0.281486	100
	BF064_95AK24 (or UWC3CPX)_Di9	52.42	0.1232	1.0607	0.0123	4.65	0.2123	15.08	24.68	0.1117	0	98.3707		49.8993	42.423	7.33838	0.339334	100
	BF106_95AK24 (or UWC3CPX)_Di1-1	52.8	0.0834	0.7194	0	3.97	0.1992	15.83	25	0.1047	0	98.7067		49.7195	43.8045	6.16277	0.313188	100
	BF106_95AK24 (or UWC3CPX)_Di1-2	53.01	0.0693	0.5771	0.027	4.08	0.2237	15.86	24.85	0.0823	0	98.7838		49.4242	43.8902	6.33391	0.351728	100
	BF106_95AK24 (or UWC3CPX)_Di1-3	53.29	0.0565	0.597	0	4.06	0.1979	16.05	25.15	0.0882	0	99.5155		49.5007	43.9541	6.23731	0.307927	100
	BF106_95AK24 (or UWC3CPX)_Di2-1	53.12	0.0921	0.7311	0	3.91	0.1819	15.95	24.93	0.1163	0	99.0314		49.5444	44.1046	6.06523	0.285781	100
	BF106_95AK24 (or UWC3CPX)_Di3-1	52.67	0.0691	0.7212	0	4.03	0.1851	15.56	24.82	0.0843	0.0079	98.1495		49.8774	43.5073	6.32128	0.29406	100
	BF106_95AK24 (or UWC3CPX)_Di3-2	52.97	0.0759	0.6392	0.005	4.14	0.2027	15.68	24.77	0.1104	0.0015	98.6157		49.561	43.6527	6.46566	0.320624	100
	95AK24 (or UWC3CPX) Cpx (average, n=12)	52.815	0.0913167	0.779833	0.00785	4.21917	0.195917	15.59	24.8083	0.102875	0.00114167	98.6114		49.668	43.4286	6.59332	0.310083	100
	%RSD	0.532697	23.8334	18.2092	114.234	5.30408	8.22787	1.88979	0.691975	12.5327	203.525			4.9547	18.8275	29.6439	46.5739	100	12.7366	57.0348	30.2286	100
	BF106_2C42_Cpx1	53.89	0.0731	1.3088	1.0747	2.07	0.04	16.6	22.65	0.7829	0	98.5252		47.7903	48.7339	3.40911	0.0667206	100	0	2.90252	97.0975	100
	BF106_2C42_Cpx2	53.51	0.0918	1.2526	1.1779	2.02	0.0585	16.89	22.75	0.7783	0.0077	98.5803		47.5209	49.089	3.29347	0.0966023	100	1.44315	1.45599	97.1009	100
	BF106_2C42_Cpx3	53.2	0.0707	1.2603	1.1803	2.1	0.0314	16.7	22.42	0.8348	0.0081	97.8427		47.3793	49.1044	3.46394	0.0524578	100	1.36452	1.77138	96.8641	100
	BF106_2C42_Cpx4	53.36	0.1114	1.1686	1.3129	1.96	0.0388	16.69	22.9	0.74	0	98.2905		48.0256	48.7017	3.20842	0.0643275	100	0.988216	1.77046	97.2413	100
	BF106_2C42_Cpx5	53.61	0.109	0.9653	1.0565	1.84	0.0523	17.11	23.32	0.5306	0	98.6328		47.9793	48.9808	2.95489	0.0850657	100	0.837331	1.11614	98.0465	100
	2C42CPX (average, n=5)	53.514	0.0912	1.19112	1.16046	1.998	0.0442	16.798	22.808	0.73332	0.00316	98.3415		47.7403	48.9222	3.26431	0.0731389	100	0.87454	1.8517	97.2738	100
	%RSD	0.488113	21.0422	11.4126	8.84039	5.15783	24.8029	1.21376	1.46973	16.1235	137.004			5.48564	6.30336	15.0264	73.1846	100	7.75051	48.4206	43.8289	100
	Session-221025
	06JY31CPX_BF106_px1A	52.97	0.3038	4.62	1.0506	2.99	0.1066	16.52	20.02	1.1009	0.0103	99.7486		44.0736	50.6029	5.13789	0.185524	100	0	4.20156	95.7984	100
	06JY31CPX_BF106_px1B	53.1	0.2899	4.6	1.1247	2.99	0.057	16.38	19.91	1.0721	0.0036	99.5866		44.166	50.557	5.17709	0.0999584	100	0	4.12611	95.8739	100
	06JY31CPX_BF106_px2A	52.89	0.2695	4.64	1.1089	2.89	0.0971	16.28	20.45	1.1365	0.0065	99.8119		45.0099	49.8563	4.9649	0.168951	100	0.0198938	4.31155	95.6686	100
	06JY31CPX_BF106_px2B	53.12	0.2669	4.53	1.128	2.81	0.1119	16.18	20.24	1.085	0	99.5046		44.9432	49.99	4.87033	0.196432	100	0	4.17772	95.8223	100
	06JY31CPX_BF106_px3A	52.75	0.2831	4.59	1.1145	2.97	0.0765	16.38	20.08	1.0985	0.0085	99.4138		44.3759	50.3673	5.12317	0.133651	100	0	4.20824	95.7918	100
	06JY31CPX_BF106_px3B	52.83	0.2938	4.54	1.0723	2.88	0.075	16.38	20.15	1.1069	0.0071	99.3897		44.532	50.3689	4.96808	0.131035	100	0	4.23919	95.7608	100
	06JY31CPX_BF106_px4_1	52.91	0.2511	4.59	1.1362	2.89	0.0634	16.35	20.15	1.0613	0	99.4503		44.5745	50.3246	4.99008	0.110874	100	0	4.07539	95.9246	100
	06JY31CPX_BF106_px4_2	53.08	0.2368	4.46	1.0568	2.8	0.0892	16.32	20.48	1.0618	0.0004	99.6434		45.0668	49.9687	4.80932	0.155174	100	0	4.05671	95.9433	100
	06JY31CPX (average, n=8)	52.9562	0.274363	4.57125	1.099	2.9025	0.0845875	16.3487	20.185	1.09038	0.00455	99.5166		44.593	50.2543	5.00505	0.147731	100	0	4.17707	95.8229	100
	%RSD	0.255339	8.25826	1.27255	3.08758	2.59625	23.5412	0.595226	0.984801	2.35155	90.4271			4.38665	3.68908	9.02673	82.8975	100	8.21146	9.03177	82.7568	100
	06JY34OPX (A)_Z7144_Opx1_1	57.13	0.0834	2.99	0.5622	5.28	0.1399	33.85	0.7308	0.1354	0.0017	100.999		1.40373	90.4677	7.91619	0.212437	100	0	0.468438	99.5316	100
	06JY34OPX (A)_Z7144_Opx1_2	56.7	0.1179	3.04	0.56	5.36	0.1105	33.84	0.6892	0.1509	0	100.69		1.32424	90.4693	8.03865	0.167846	100	0	0.521946	99.4781	100
	06JY34OPX (A)_Z7144_Opx2_1	56.74	0.0899	3.06	0.5113	5.32	0.1483	33.57	0.7294	0.1203	0	100.372		1.4106	90.332	8.03063	0.22673	100	0	0.419247	99.5808	100
	06JY34OPX (A)_Z7144_Opx2_2	57.09	0.0913	3.12	0.5611	5.32	0.1279	33.71	0.7214	0.1301	0	100.965		1.39054	90.4103	8.00421	0.194898	100	0	0.451761	99.5482	100
	06JY34OPX (average, n=4)	56.915	0.095625	3.0525	0.54865	5.32	0.13165	33.7425	0.7177	0.134175	0.000425	100.658		1.38223	90.42	7.99735	0.20044	100	0	0.465448	99.5346	100
	%RSD	0.397694	15.9411	1.76165	4.54136	0.613907	12.4557	0.38971	2.70949	9.52839	200			19.9554	3.99361	3.52919	72.5218	100	1.5793	55.2502	43.1705	100
	2C42CPX_BF106_Cpx1	54.87	0.0788	1.91	1.0437	2.65	0.062	18.16	20.19	0.8167	0	99.8282		42.4381	53.1112	4.34774	0.103024	100	0	3.0129	96.9871	100
	2C42CPX_BF106_Cpx2	54.83	0.0978	1.92	1.0621	2.1	0.0482	16.28	22.27	1.0034	0	99.6275		47.7905	48.6102	3.51754	0.0817705	100	0	3.75045	96.2495	100
	2C42CPX_BF106_Cpx3	54.68	0.1058	1.8828	1.083	2.12	0.0582	16.37	22.28	1.0471	0.0048	99.6501		47.6497	48.7129	3.53899	0.0984002	100	0	3.89466	96.1053	100
	2C42CPX_BF106_Cpx4	55.21	0.0998	1.3488	0.7782	1.96	0.0626	16.83	23.1	0.588	0.0094	100.033		48.0284	48.6879	3.18083	0.102894	100	0	2.16446	97.8355	100
	2C42CPX_BF106_Cpx5	54.73	0.1266	1.7151	1.0926	2.04	0.0503	16.51	22.68	0.8451	0.0038	99.8293		47.9655	48.5829	3.36755	0.0840972	100	0	3.13299	96.867	100
	2C42CPX_BF106_Cpx6	54.91	0.099	1.396	1.0497	1.8	0.0482	16.77	23.32	0.5532	0.0006	99.967		48.4855	48.5141	2.92116	0.0792244	100	0	2.03896	97.961	100
	2C42CPX_BF106_Cpx7	55.01	0.0841	1.5022	0.9977	2.05	0.0482	16.43	22.29	1.0293	0	99.5015		47.6395	48.8592	3.41987	0.081439	100	0	3.82855	96.1714	100
	2C42CPX_BF106_Cpx8	54.53	0.1102	1.7686	1.48	1.9	0.0456	16.12	22.47	0.9346	0	99.4055		48.4075	48.3199	3.19493	0.077661	100	0	3.51546	96.4845	100
	2C42CPX_BF106_Cpx9	54.7	0.0918	1.6659	1.2166	2.02	0.0562	16.51	22.8	0.7722	0.0033	99.8602		48.1083	48.4711	3.32686	0.0937453	100	0	2.86407	97.1359	100
	2C42CPX (average, n=9)	54.83	0.0993222	1.67882	1.08929	2.07111	0.0532778	16.6644	22.3778	0.843289	0.00243333	99.7098		47.3871	49.1004	3.4233	0.0891903	100	0	3.13038	96.8696	100
	%RSD	0.36715	14.3118	13.0307	17.1276	11.5463	12.2527	3.61845	4.0289	21.5906	133.007			14.5121	18.135	32.4626	34.8903	100	15.5867	51.9857	32.4276	100
	97M43OPX_BF106_Opx1	49.86	0.0829	5.07	0.2739	21.83	0.2146	21.02	0.0676	0	0	98.4564		0.145302	62.865	36.625	0.364656	100	0	0	100	100
	97M43OPX_BF106_Opx14	50.21	0.1439	5.2	0.1069	22.22	0.2918	20.57	0.0542	0.0206	0.0001	98.863		0.11719	61.8838	37.5002	0.498775	100	0	0.0805375	99.9195	100
	97M43OPX_BF106_Opx15	50.51	0.0531	4.52	0.2503	22.52	0.2768	20.75	0.07	0	0.0023	98.9759		0.14977	61.7728	37.6093	0.46819	100	0	0	100	100
	97M43OPX_BF106_Opx18	49.95	0.1111	5.22	0.2539	22.03	0.2172	20.96	0.0626	0	0	98.8546		0.134354	62.5918	36.9053	0.368522	100	0	0	100	100
	97M43OPX_BF106_Opx19	49.99	0.0874	5.07	0.2828	22.73	0.2415	20.47	0.0483	0.0082	0	98.954		0.103954	61.3003	38.1849	0.410903	100	0	0.031927	99.9681	100
	97M43OPX_BF106_Opx2	51.19	0.0748	4.09	0.2857	21.64	0.187	21.49	0.0429	0.0042	0.0508	99.0847		0.0913099	63.6426	35.9514	0.314652	100	0	0.0161744	99.9838	100
	97M43OPX_BF106_Opx4	50.24	0.0779	5.35	0.3228	22.06	0.2459	20.88	0.0477	0.0054	0	99.2561		0.102551	62.4603	37.0192	0.417936	100	0	0.0210046	99.979	100
	97M43OPX_BF106_Opx5	50.43	0.0796	5.42	0.2386	21.15	0.2134	21.26	0.0828	0.0035	0	98.8779		0.178675	63.8333	35.6239	0.364046	100	0	0.0136657	99.9863	100
	97M43OPX_BF106_Opx7	49.94	0.0854	5.64	0.2282	21.41	0.2214	20.81	0.0559	0	0	98.4201		0.121793	63.0863	36.4105	0.381345	100	0	0	100	100
	97M43OPX_BF106_Opx8	49.59	0.5125	5.57	0.2788	21.86	0.1943	20.53	0.0644	0.0055	0.0031	98.6249		0.14047	62.3071	37.2174	0.335041	100	0	0.0217048	99.9783	100
	97M43OPX (average, n=10)	50.191	0.13086	5.115	0.25219	21.945	0.23039	20.874	0.05964	0.00474	0.00563	98.8084		0.128493	62.5748	36.9043	0.392405	100	0	0.0184769	99.9815	100
	%RSD	0.889014	104.122	9.34846	22.932	2.18784	14.6601	1.55697	20.4095	132.728	282.62			56.8936	6.03898	4.76042	32.307	100	0.622449	86.9245	12.4531	100
	97M44OPX_BF064_Opx1	50.61	0.1201	6.1	0.1719	20.07	0.129	21.7	0.0592	0	0	98.9844		0.12864	65.609	34.0407	0.221601	100	0	0	100	100
	97M44OPX_BF106_Opx1	49.92	0.0596	5.38	0.2539	21.96	0.2089	20.96	0.0516	0.0025	0	98.8341		0.110917	62.689	36.8451	0.35499	100	0	0.0097238	99.9903	100
	97M44OPX_BF125_Opx1	50.19	0.102	6.28	0.2538	19.58	0.1423	22.45	0.0738	0.002	0	99.1445		0.158009	66.8794	32.7217	0.240856	100	0	0.00774838	99.9923	100
	Z7143_97M44OPX_Opx1	50.75	0.056	5.13	0.2578	20.87	0.1472	21.77	0.0788	0.0022	0.0073	99.0857		0.168463	64.7571	34.8256	0.248779	100	0	0.00851046	99.9915	100
	97M44OPX_BF125_Opx10	50.66	0.1056	5.76	0.2169	20.32	0.1459	22.2	0.06	0	0.0021	99.5079		0.127864	65.8263	33.8001	0.245798	100	0	0	100	100
	97M44OPX_BF064_Opx12	51.07	0.0586	5.83	0.2187	20.11	0.1066	22.18	0.0735	0	0.0015	99.6808		0.157335	66.0616	33.6006	0.180394	100	0	0	100	100
	97M44OPX_BF106_Opx12	50.71	0.053	5.27	0.1842	21.48	0.1535	21.34	0.0511	0	0	99.2618		0.109584	63.6753	35.9549	0.260233	100	0	0	100	100
	97M44OPX_BF064_Opx13	50.51	0.0525	5.68	0.236	21.28	0.18	21.28	0.0414	0.0023	0	99.2978		0.0892191	63.8087	35.7954	0.306661	100	0	0.00896882	99.991	100
	97M44OPX_BF106_Opx13	50.6	0.1139	5.85	0.2246	19.93	0.1374	22.28	0.0755	0	0.0084	99.2508		0.161529	66.324	33.2821	0.232391	100	0	0	100	100
	97M44OPX_BF106_Opx14	51.14	0.09	5.22	0.1843	19.78	0.1128	22.53	0.0605	0.0036	0.0024	99.1475		0.128896	66.7877	32.8934	0.189986	100	0	0.0138776	99.9861	100
	97M44OPX_BF106_Opx15	51.06	0.0923	5.69	0.1848	20.08	0.1499	22.24	0.0529	0	0.0045	99.5903		0.11306	66.136	33.4977	0.253269	100	0	0	100	100
	97M44OPX_BF106_Opx16	49.86	0.0721	5.92	0.2455	21.73	0.1489	21.11	0.0497	0	0	99.1362		0.106879	63.165	36.475	0.25314	100	0	0	100	100
	97M44OPX_BF106_Opx17	51.44	0.057	3.9	0.1575	21.74	0.1859	21.88	0.0685	0.0019	0	99.447		0.143822	63.9195	35.6281	0.308562	100	0	0.00721849	99.9928	100
	97M44OPX_BF064_Opx2	51.38	0.092	5.18	0.181	19.52	0.1281	22.62	0.0692	0	0.0134	99.1975		0.147611	67.1359	32.5005	0.216017	100	0	0	100	100
	Z7143_97M44OPX_Opx2	50.45	0.0531	4.5	0.2441	22.39	0.1819	20.91	0.0489	0	0	98.8039		0.104569	62.2158	37.3721	0.307508	100	0	0	100	100
	97M44OPX_BF106_Opx20	50.31	0.1057	6.03	0.1791	21.02	0.1404	21.3	0.0606	0.0015	0	99.1731		0.131125	64.1274	35.5013	0.240164	100	0	0.00587311	99.9941	100
	97M44OPX_BF106_Opx22	50.28	0.0595	6.05	0.21	20.67	0.1132	21.53	0.0402	0.0009	0	98.9901		0.0869747	64.813	34.9065	0.193616	100	0	0.00352357	99.9965	100
	97M44OPX_BF106_Opx24 <-- BF106_HYP_GRAIN24	49.35	0.3944	6.65	0.1888	20.57	0.1169	21.48	0.0684	0.003	0.0039	98.8318		0.148361	64.8258	34.8254	0.20045	100	0	0.011774	99.9882	100
	97M44OPX_BF106_Opx3	50.42	0.1058	5.79	0.1681	20.72	0.1357	21.76	0.0633	0	0	99.2001		0.135778	64.9434	34.6907	0.230109	100	0	0	100	100
	97M44OPX_BF125_Opx3_2	50.15	0.132	5.89	0.2336	21.05	0.175	21.27	0.0603	0.0276	0	99.0158		0.130451	64.025	35.5453	0.299294	100	0	0.107935	99.8921	100
	97M44OPX_BF064_Opx4	50.47	0.1058	6.27	0.2177	20.3	0.1326	21.78	0.0616	0	0	99.3567		0.132999	65.43	34.2107	0.226329	100	0	0	100	100
	97M44OPX_BF125_Opx5_1	50.45	0.0643	5.7	0.2067	20.6	0.1299	21.98	0.0606	0	0.0101	99.229		0.129417	65.3126	34.3387	0.219309	100	0	0	100	100
	97M44OPX_BF106_Opx7	50.82	0.087	5.34	0.2313	21.02	0.1198	21.6	0.0547	0.0028	0	99.2951		0.117355	64.4792	35.2003	0.203189	100	0	0.0108696	99.9891	100
	97M44OPX_BF125_Opx8_1	49.77	0.0773	6.56	0.1104	21.17	0.1177	21.39	0.0715	0.0031	0.0077	99.3151		0.153927	64.0722	35.5736	0.200315	100	0	0.0120755	99.9879	100
	97M44OPX_Z7141_Opx11	50.65	0.0338	5.29	0.2362	22.12	0.1652	20.69	0.0618	0.0113	0.008	99.3127		0.133633	62.2496	37.3344	0.282399	100	0	0.0441978	99.9558	100
	97M44OPX_Z7141_Opx15_1	50.6	0.0277	5.1	0.2862	21.65	0.156	20.94	0.0891	0.011	0.0048	98.915		0.192661	63.0004	36.5403	0.266666	100	0	0.043024	99.957	100
	97M44OPX_Z7141_Opx16_1	52.09	0.0487	5	0.1861	18.34	0.1056	23.63	0.1032	0.0008	0	99.5505		0.217811	69.3928	30.2132	0.176194	100	0	0.00305538	99.9969	100
	97M44OPX_Z7141_Opx18_1	50.6	0.0429	6.27	0.2662	20.4	0.1185	21.57	0.0482	0	0	99.3371		0.104607	65.1348	34.5573	0.20331	100	0	0	100	100
	97M44OPX_Z7141_Opx6_1	50.69	0.0805	6.07	0.1581	19.89	0.089	22.31	0.0597	0	0.0049	99.3721		0.127845	66.4752	33.2462	0.15067	100	0	0	100	100
	97M44OPX_Z7141_Opx6_2	50.9	0.0976	5.89	0.2085	19.93	0.1253	22.17	0.0602	0	0	99.421		0.129288	66.2487	33.4092	0.212736	100	0	0	100	100
	97M44OPX_Z7141_Opx9_1	50.29	0.0368	5.81	0.2392	21.96	0.1606	20.62	0.0583	0.0011	0	99.2143		0.126693	62.3483	37.2491	0.275904	100	0	0.00432562	99.9957	100
	97M44OPX_Z7142_Opx2_1	49.94	0.0353	5.97	0.2562	20.24	0.1682	21.61	0.0583	0.0107	0	98.3443		0.126581	65.2836	34.3011	0.288704	100	0	0.0420232	99.958	100
	97M44OPX_Z7142_Opx5_2	50.3	0.0499	5.19	0.2203	21.15	0.1343	21.72	0.0322	0.0133	0.0063	98.8588		0.0687035	64.4813	35.2234	0.226531	100	0	0.0513264	99.9487	100
	97M44OPX_Z7142_Opx7_3	50.25	0.3125	5.48	0.2043	20.13	0.1164	22.23	0.0808	0	0	98.8224		0.172591	66.0688	33.562	0.196556	100	0	0	100	100
	97M44OPX_Z7144_Opx2_1	50.88	0.1106	5.4	0.1472	21.21	0.1616	21.52	0.0728	0.0126	0	99.5423		0.155893	64.1191	35.4514	0.273567	100	0	0.0488025	99.9512	100
	97M44OPX_Z7144_Opx3_1	50.98	0.249	5.47	0.1897	19.98	0.1512	22.61	0.0795	0.0066	0.0062	99.7797		0.16824	66.5755	33.0033	0.252955	100	0	0.0252689	99.9747	100
	97M44OPX (average, n=36)	50.5706	0.0954139	5.63639	0.209969	20.6933	0.141428	21.7544	0.062775	0.00335556	0.00254167	99.1702		0.134723	64.961	34.6643	0.239948	100	0	0.0130302	99.987	100
	%RSD	1.01944	79.2491	9.79148	18.2044	4.21184	18.5251	2.88934	22.3191	172.091	144.056			50.4137	9.08077	7.42579	33.0797	100	0.932887	87.4372	11.6299	100
	97SL17OMP_BF106_Omp1	56.32	0.0886	12.18	0.0201	4.43	0.0142	7.39	12.06	7.45	0.0013	99.9542		46.7234	39.8366	13.3964	0.0434914	100	0.382735	34.0592	65.5581	100
	97SL17OMP_BF106_Omp10	56.93	0.0572	12.29	0.0389	4.13	0.0084	7.49	11.79	7.62	0	100.364		46.341	40.9623	12.6707	0.0261011	100	0	35.149	64.851	100
	97SL17OMP_BF106_Omp11	56.6	0.044	12.44	0.0201	4.03	0.0206	7.39	11.64	7.58	0.0086	99.8004		46.4035	40.9914	12.5401	0.0649222	100	0	35.3519	64.6481	100
	97SL17OMP_BF106_Omp12	56.13	0.0967	12.08	0.0341	4.25	0.0237	7.79	12.6	7.11	0	100.149		47.0588	40.4817	12.3896	0.0699756	100	0.129815	32.3694	67.5008	100
	97SL17OMP_BF106_Omp13	56.79	0.065	12.75	0.0355	4.33	0.0084	7.19	11.44	7.64	0.0002	100.268		46.0723	40.2897	13.6113	0.0267437	100	0	35.7655	64.2345	100
	97SL17OMP_BF106_Omp2	56.75	0.0613	12.79	0.018	4.76	0.0153	6.73	10.82	8	0	99.9711		45.25	39.1613	15.5381	0.0505838	100	0	37.7118	62.2882	100
	97SL17OMP_BF106_Omp3	55.69	0.1247	12.09	0.0328	4.47	0.0037	7.74	12.87	6.71	0	99.7462		47.4359	39.6936	12.8598	0.010781	100	0	30.9177	69.0823	100
	97SL17OMP_BF106_Omp4	56.6	0.0872	12.81	0.0301	4.58	0.0095	6.98	11.14	7.84	0	100.077		45.5915	39.7471	14.6306	0.0307362	100	0	36.7343	63.2657	100
	97SL17OMP_BF106_Omp5	56.81	0.0421	12.62	0.0227	4.26	0.0221	7.26	11.41	7.85	0.0028	100.31		45.9079	40.6433	13.3786	0.0702946	100	0.563994	36.01	63.426	100
	97SL17OMP_BF106_Omp6	56.33	0.0622	12.57	0.0147	4.99	0.0116	6.76	10.94	7.94	0	99.6441		45.1135	38.7871	16.0616	0.037816	100	0.96161	36.6024	62.436	100
	97SL17OMP_BF106_Omp7	56.93	0.018	12.54	0.0154	4.18	0.0111	7.17	11.44	7.73	0	100.045		46.3387	40.4099	13.2158	0.0355442	100	0	36.168	63.832	100
	97SL17OMP_BF106_Omp8	56.77	0.02	12.12	0.0221	3.97	0.0169	7.73	11.96	7.47	0	100.091		46.307	41.6434	11.9979	0.0517286	100	0	34.3569	65.6431	100
	97SL17OMP_BF106_Omp9	56.56	0.0677	12.41	0.0074	4.19	0.0216	7.44	11.66	7.63	0.0072	100.007		46.0878	40.9177	12.9271	0.0674946	100	0.241168	35.1508	64.608	100
	97SL17OMP (average, n=13)	56.5546	0.0642077	12.4377	0.0239923	4.35154	0.0143923	7.31231	11.6746	7.58231	0.00154615	100.017		46.2235	40.2833	13.4481	0.0450483	100	0	35.2023	64.7977	100
	%RSD	0.630243	46.9385	2.15267	39.5164	6.69846	43.5942	4.73412	5.10709	4.63705	190.67			9.9387	12.8188	10.1749	67.0677	100	9.58492	5.79826	84.6168	100
	97SL21OMP_BF106_Omp1	55.78	0.1028	11.82	0.0354	4.94	0.0211	7.62	12.62	6.97	0.0013	99.9213		46.5768	39.1306	14.231	0.0615632	100	0.481217	31.4362	68.0826	100
	97SL21OMP_BF106_Omp10	56.18	0.0777	11.96	0.0228	4.75	0	7.71	12.47	7.12	0	100.29		46.3478	39.872	13.7802	0	100	0.465796	32.0666	67.4676	100
	97SL21OMP_BF106_Omp2	55.14	0.1422	11.56	0	5.19	0.0259	7.75	13.56	6.57	0	99.9468		47.7216	37.9496	14.2568	0.0720581	100	1.58504	28.3814	70.0336	100
	97SL21OMP_BF106_Omp3	56.17	0.0901	12.11	0.0268	4.57	0.0121	7.48	12.21	7.17	0.0075	99.8572		46.6132	39.7325	13.6178	0.036518	100	0	33.1255	66.8745	100
	97SL21OMP_BF106_Omp4	55.79	0.0911	12.14	0.014	4.87	0.0232	7.46	12.59	7.05	0	100.028		46.9962	38.746	14.1894	0.0684625	100	0.431437	31.9675	67.601	100
	97SL21OMP_BF106_Omp5	55.84	0.1181	11.53	0.0154	4.95	0.0386	7.75	13.19	6.62	0	100.052		47.3311	38.6949	13.8645	0.109501	100	0	30.0641	69.9359	100
	97SL21OMP_BF106_Omp6	56.22	0.079	12.22	0.0228	4.31	0.0159	7.55	12.13	7.39	0.0051	99.9656		46.6327	40.3857	12.9332	0.0483232	100	0.618463	33.5465	65.835	100
	97SL21OMP_BF106_Omp7	56.45	0.0694	11.92	0.0214	4.36	0.0169	7.61	12.26	7.36	0	100.09		46.678	40.3141	12.9571	0.050867	100	0.422991	33.3665	66.2105	100
	97SL21OMP_BF106_Omp8	56.2	0.0948	12.26	0	4.62	0.0243	7.49	12.16	7.2	0.0027	100.052		46.4	39.7665	13.7602	0.0733025	100	0	33.2074	66.7926	100
	97SL21OMP_BF106_Omp9	55.83	0.1333	11.88	0.0074	4.85	0.0174	7.54	12.75	6.96	0	99.9778		47.1514	38.7978	13.9999	0.05087	100	0.0714973	31.7283	68.2002	100
	97SL21OMP (average, n=10)	55.96	0.09985	11.94	0.0166	4.741	0.01954	7.596	12.594	7.041	0.00166	100.01		46.8543	39.3207	13.7675	0.0574696	100	0.167122	32.0456	67.7873	100
	%RSD	0.658686	24.3123	2.12796	69.5997	5.83303	51.2959	1.45304	3.73507	3.91104	160.245			7.34359	3.97502	8.95164	79.7298	100	8.52833	4.7289	86.7428	100
	97SL65CPX_BF064_Di1	55.25	0.0365	1.0984	0.0545	1.67	0.0016	16.82	24.49	0.4594	0	99.914		49.7784	47.5695	2.64952	0.00257099	100	0	1.66171	98.3383	100
	97SL65CPX_BF106_Di1	54.97	0.0453	1.6279	0.0749	1.87	0.0074	16.64	24.15	0.6242	0	100.017		49.5199	47.4752	2.99297	0.0119956	100	0	2.26376	97.7362	100
	97SL65CPX_BF125_Di1	54.94	0.0438	1.112	0.0211	1.7	0.0112	16.81	24.47	0.4911	0.0016	99.6042		49.7407	47.5441	2.69727	0.017998	100	0	1.77444	98.2256	100
	97SL65CPX_BF106_Di10	55.47	0.0092	1.145	0.0129	1.65	0.0016	16.85	24.25	0.6265	0	100.022		49.5058	47.8624	2.62922	0.00258221	100	0	2.26213	97.7379	100
	97SL65CPX_BF106_Di11	54.86	0.0762	1.2935	0.0182	1.65	0	16.84	24.68	0.4533	0.0005	99.9049		49.9605	47.4324	2.60714	0	100	0	1.63344	98.3666	100
	97SL65CPX_BF106_Di12	55.36	0.0259	1.0561	0.0209	1.6	0	16.68	24.14	0.6555	0.0128	99.6201		49.6735	47.7567	2.56984	0	100	0	2.38274	97.6173	100
	97SL65CPX_BF106_Di13	55.46	0.0298	1.0398	0.0473	1.65	0.0016	16.84	24.4	0.6293	0.0003	100.123		49.674	47.7015	2.62193	0.00257506	100	0	2.26586	97.7341	100
	97SL65CPX_BF106_Di14	55.23	0	1.0804	0.0094	1.72	0	16.96	24.41	0.5941	0.0025	100.018		49.4624	47.8172	2.72041	0	100	0	2.13205	97.868	100
	97SL65CPX_BF106_Di15	55.21	0.0849	1.2031	0.0426	1.67	0.0201	16.82	24.27	0.5847	0	99.9425		49.538	47.7689	2.66062	0.0324334	100	0	2.11403	97.886	100
	97SL65CPX_BF106_Di16	55.53	0.0199	1.1187	0.0129	1.68	0.0064	16.93	24.45	0.5635	0.0196	100.361		49.5715	47.7596	2.65865	0.010258	100	0	2.02558	97.9744	100
	97SL65CPX_BF106_Di17	55.54	0.0489	1.0922	0.0168	1.65	0.019	16.81	24.26	0.6226	0	100.096		49.5585	47.7799	2.63093	0.0306838	100	0	2.24979	97.7502	100
	97SL65CPX_BF106_Di18	55.23	0.0355	1.2689	0.0345	1.75	0	16.72	24.35	0.5921	0	99.9964		49.7141	47.4971	2.7888	0	100	0	2.14075	97.8592	100
	97SL65CPX_BF106_Di2	55.95	0	0.5746	0.0101	1.4	0.0079	17.45	24.68	0.4361	0	100.526		49.3019	48.5026	2.18296	0.012476	100	0	1.55203	98.448	100
	97SL65CPX_BF125_Di2	54.92	0.0703	1.2923	0.0089	1.88	0.0085	16.76	24.22	0.5479	0	99.7321		49.4145	47.5779	2.99389	0.0137097	100	0	1.98277	98.0172	100
	97SL65CPX_BF064_Di3	55.38	0.0439	1.1011	0.0397	1.62	0.0042	16.79	24.46	0.5481	0	100.017		49.8275	47.5898	2.57588	0.00676379	100	0	1.9805	98.0195	100
	97SL65CPX_BF106_Di3	55.25	0.0424	0.8764	0.0324	1.57	0.0148	17.03	24.67	0.405	0	99.8968		49.7353	47.7706	2.47055	0.0235877	100	0	1.45603	98.544	100
	97SL65CPX_BF064_Di4	55.52	0.0239	1.1214	0.0148	1.66	0.0032	16.78	24.39	0.6231	0	100.142		49.7391	47.6134	2.64236	0.00515898	100	0	2.24781	97.7522	100
	97SL65CPX_BF106_Di4	55.19	0.0161	1.1724	0.0317	1.67	0.0206	16.75	24.54	0.5565	0.0044	99.9927		49.9129	47.4028	2.65126	0.0331233	100	0	2.00718	97.9928	100
	97SL65CPX_BF125_Di4	55.1	0.0119	1.1024	0.038	1.54	0	16.83	24.32	0.73	0.0075	99.7069		49.6943	47.8495	2.45619	0	100	0.326329	2.31062	97.363	100
	97SL65CPX_BF106_Di5	55.52	0.0125	1.0984	0.0398	1.63	0	16.77	24.26	0.6966	0.0145	100.054		49.646	47.7504	2.60363	0	100	0	2.51481	97.4852	100
	97SL65CPX_BF064_Di6	55.56	0.0587	1.0664	0.0262	1.64	0.0058	16.94	24.67	0.4248	0	100.441		49.8133	47.5927	2.58475	0.00925832	100	0	1.52848	98.4715	100
	97SL65CPX_BF106_Di6	55.41	0.0276	1.1364	0.025	1.68	0.0106	16.74	24.17	0.6818	0	99.9055		49.5473	47.7474	2.68813	0.0171782	100	0	2.46684	97.5332	100
	97SL65CPX_BF106_Di7	55.3	0.0375	1.11	0.0398	1.66	0.0137	16.79	24.53	0.5535	0	100.057		49.8597	47.4847	2.63365	0.0220141	100	0	1.99529	98.0047	100
	97SL65CPX_BF106_Di8	55.61	0.0396	1.1077	0.0385	1.52	0	16.78	24.27	0.6786	0.0045	100.049		49.7295	47.8395	2.43101	0	100	0	2.45445	97.5455	100
	97SL65CPX_BF106_Di9	55.17	0.0364	1.1928	0.0446	1.75	0	16.64	24.29	0.5452	0.0119	99.7185		49.7656	47.4358	2.79858	0	100	0	1.98133	98.0187	100
	97SL65CPX_Z7141_Di1_1	55.56	0.0632	1.0946	0.0463	1.6	0	16.77	24.34	0.6676	0	100.145		49.7521	47.6952	2.55275	0	100	0	2.40992	97.5901	100
	97SL65CPX_Z7141_Di2	55.54	0.0479	1.1818	0.0517	1.72	0	16.72	24.32	0.5669	0.0039	100.187		49.707	47.549	2.74398	0	100	0	2.0537	97.9463	100
	97SL65CPX_Z7141_Di3	55.44	0.0336	1.167	0.0591	1.58	0	16.6	24.19	0.6411	0	99.7338		49.8553	47.603	2.54174	0	100	0	2.33522	97.6648	100
	97SL65CPX_Z7141_Di4_1	55.55	0.0221	1.1411	0.0114	1.59	0.0147	16.72	24.26	0.5954	0	99.9167		49.7367	47.6951	2.54438	0.0238249	100	0	2.1612	97.8388	100
	97SL65CPX_Z7141_Di5_1	55.63	0.0096	0.9839	0.0289	1.47	0	16.98	24.36	0.585	0.0011	100.082		49.5794	48.0853	2.33528	0	100	0	2.10917	97.8908	100
	97SL65CPX_Z7141_Di6	55.75	0.0176	1.1469	0.0369	1.64	0	16.59	24.14	0.6906	0	100.048		49.7697	47.5911	2.63919	0	100	0	2.51186	97.4881	100
	97SL65CPX_Z7142_Di1_2	54.81	0.0298	1.0641	0.0431	1.58	0.0027	16.93	24.56	0.4208	0.0028	99.4721		49.7652	47.7315	2.49892	0.00432503	100	0	1.51954	98.4805	100
	97SL65CPX_Z7142_Di2_2	54.69	0.0791	1.2274	0.0281	1.75	0.0005	16.93	24.17	0.5896	0	99.4754		49.2334	47.9834	2.7824	0.000805158	100	0.252695	1.8798	97.8675	100
	97SL65CPX_Z7142_Di3_2	54.89	0.0375	1.1152	0.0609	1.71	0.008	16.72	24.51	0.6174	0.0066	99.72		49.9031	47.3665	2.71756	0.0128766	100	0.215078	2.01389	97.771	100
	97SL65CPX (average, n=34)	55.3174	0.0357971	1.12383	0.0329971	1.65059	0.00541471	16.8156	24.3718	0.57935	0.00277941	99.9355		49.6759	47.6894	2.62601	0.00872492	100	0	2.09221	97.9078	100
	%RSD	0.529133	60.7392	13.5989	50.4304	5.78216	121.329	0.919443	0.67636	14.7832	178.255			0.660605	1.24951	4.40811	93.6818	100	3.62149	17.8448	78.5337	100
	GQ01-8OMP_BF106_Omp1	55.03	0.0656	6.75	0	8.67	0.0126	7.98	13.74	6.19	0.0038	98.442		43.4526	35.1142	21.4016	0.0315013	100	6.52987	21.3366	72.1335	100
	GQ01-8OMP_BF106_Omp10	55.63	0.0504	7.67	0.002	8.35	0.0116	8.02	12.78	6.72	0.0075	99.2415		41.9488	36.628	21.3931	0.0301006	100	7.1586	23.4122	69.4292	100
	GQ01-8OMP_BF106_Omp11	55.89	0.059	7.27	0.0179	6.94	0.0211	8.8	14.36	6.17	0	99.5468		44.8218	38.2181	16.908	0.052065	100	5.2696	21.9361	72.7943	100
	GQ01-8OMP_BF106_Omp2	54.66	0.0237	5	0	9.19	0.022	9.33	15.7	5.17	0	99.0957		43.7663	36.1887	19.9965	0.0484832	100	8.51921	13.9288	77.552	100
	GQ01-8OMP_BF106_Omp3	55.42	0	7.1	0.0033	8.41	0	8.14	13.68	6.31	0	99.0633		43.3318	35.8753	20.7929	0	100	6.65354	21.6757	71.6707	100
	GQ01-8OMP_BF106_Omp4	55.41	0.0343	6.39	0.0179	8.28	0.011	8.7	14.18	6.01	0.0052	99.0562		43.2888	36.9547	19.73	0.0265473	100	6.80529	19.817	73.3777	100
	GQ01-8OMP_BF106_Omp5	55.45	0.0303	6.77	0	7.75	0.0116	8.7	14.32	5.98	0.0074	99.0328		44.0839	37.2655	18.6224	0.0282308	100	5.7872	20.6481	73.5647	100
	GQ01-8OMP_BF106_Omp6	55.57	0.018	6.71	0.0286	7.77	0.0137	8.82	14.52	6.06	0.0049	99.5287		44.177	37.3378	18.4522	0.0329517	100	7.17229	19.6399	73.1878	100
	GQ01-8OMP_BF106_Omp7	55.98	0.0513	7.52	0	6.73	0	9.06	14.38	5.97	0.008	99.7158		44.6042	39.1017	16.2941	0	100	3.81179	22.2444	73.9438	100
	GQ01-8OMP_BF106_Omp8	55.46	0.0675	7.61	0	8.45	0.0305	7.85	13.3	6.6	0.0005	99.3917		43.1228	35.414	21.385	0.0781777	100	7.32392	22.6353	70.0408	100
	GQ01-8OMP_BF106_Omp9	54.97	0.0395	5.44	0.0232	8.8	0.0431	9.34	16.11	5.04	0	99.8058		44.7394	36.0905	19.0755	0.0946237	100	6.90743	14.6984	78.3941	100
	GQ01-8OMP (average, n=11)	55.4064	0.0399636	6.74818	0.00844545	8.12182	0.0161091	8.61273	14.2791	6.02	0.00339091	99.2561		43.7808	36.743	19.4372	0.0390465	100	6.53701	20.1382	73.3248	100
	%RSD	0.706858	52.9925	12.818	131.177	9.34873	78.4997	6.24568	6.75837	8.55216	99.6892			7.96945	10.2475	8.60473	73.1783	100	7.84783	8.79639	83.3558	100
	NIJ-JD_BF106_Jd1_1	60.49	0.0096	25.47	0	0.0393	0.0037	0.0054	0.0255	15.13	0.0064	101.195		38.2802	11.2792	46.0495	4.39101	100	0	99.7573	0.242707	100
	NIJ-JD_BF106_Jd1_2	60.48	0.0047	25.4	0.0149	0	0	0.0061	0.0302	15.18	0.0012	101.117		78.0614	21.9386	0	0	100	0	99.8594	0.140637	100
	NIJ-JD_BF106_Jd1_3	60.37	0.0546	25.14	0	0.0782	0.0011	0.0072	0.0325	15.16	0	100.855		31.1224	9.59342	58.4514	0.832743	100	0	99.6208	0.379203	100
	NIJ-JD_BF106_Jd1_4	60.19	0.0239	25.2	0.002	0.0659	0.0322	0.0021	0.1451	15.13	0	100.824		64.5131	1.29912	22.8699	11.3179	100	0	99.1852	0.814776	100
	NIJ-JD_BF106_Jd2_1	60.21	0.0039	25.53	0.0168	0.0463	0.0116	0	0.0458	14.95	0.0069	100.828		50.2691	0	39.6657	10.0652	100	0	99.6644	0.33564	100
	NIJ-JD_BF106_Jd2_2	60.17	0.075	25.16	0	0.2786	0.0201	0.026	0.0671	15.01	0	100.811		19.9331	10.7467	64.5998	4.72037	100	0	98.7759	1.22413	100
	NIJ-JD_BF106_Jd2_3	60.21	0.0017	25.48	0	0.0186	0	0	0.0223	15.15	0	100.883		60.568	0	39.432	0	100	0	99.8659	0.134115	100
	NIJ-JD_BF106_Jd3 <-- BF106_JD_01	59.48	0.0028	25.17	0	0	0	0	0.1944	14.93	0.0053	99.7825		100	0	0	0	100	0	99.2856	0.714387	100
	NIJ-JD_BF106_Jd3_1	60.12	0	25.25	0	0.0292	0.01	0	0.1586	15.04	0.0074	100.633		83.7835	0	12.0403	4.17622	100	0	99.3093	0.690713	100
	NIJ-JD_BF106_Jd3_2	60.23	0.0313	25.37	0	0.0446	0.0137	0.0091	0.0635	15.09	0	100.867		52.1327	10.3951	28.5805	8.89171	100	0	99.5559	0.444071	100
	NIJ-JD_BF106_Jd3_3	60.18	0.0037	25.26	0	0.0255	0.0005	0.0002	0.0423	15.05	0	100.594		67.2737	0.442574	31.6551	0.628641	100	0	99.7697	0.230339	100
	NIJ-JD (average, n=11)	60.1936	0.0192	25.3118	0.00306364	0.0569273	0.00844545	0.0051	0.0752091	15.0745	0.00247273	100.75		56.3718	5.31879	33.3051	5.0043	100	0	99.5133	0.486694	100
	%RSD	0.445234	130.27	0.563949	207.727	136.016	123.828	151.293	81.223	0.566289	131.419			16.3825	42.4592	21.4136	19.7446	100
	NRM-AG1_BF064_Cpx1_1	50.61	0.8541	3.41	0.0079	8.41	0.2034	13.8	21.12	0.3093	0	98.7252		44.8918	40.8134	13.953	0.341784	100	0.697624	0.486303	98.8161	100
	NRM-AG1_BF064_Cpx1_11	50.83	0.8608	3.29	0.0277	8.21	0.2269	13.96	21.4	0.2811	0.0082	99.111		45.1367	40.9687	13.5163	0.378337	100	0.84669	0.223825	98.9295	100
	NRM-AG1_BF064_Cpx1_21	50.99	0.8932	3.28	0.0673	8.31	0.1813	14.25	21.15	0.3076	0.0039	99.452		44.4262	41.648	13.6247	0.301061	100	1.07326	0.0948693	98.8319	100
	NRM-AG1_BF064_Cpx2_1	50.53	0.843	3.33	0.0428	8.59	0.2208	13.83	21.28	0.3158	0	98.9824		44.8922	40.595	14.1446	0.368236	100
	NRM-AG1_BF064_Cpx2_2	50.51	0.8981	3.56	0.002	8.65	0.2094	13.89	21.05	0.3303	0.0024	99.1022		44.509	40.8648	14.2761	0.350027	100
	NRM-AG1_BF064_Cpx3_1	49.77	0.9366	3.96	0.0224	8.83	0.2024	13.65	21.23	0.3662	0	98.9733		44.9077	40.1748	14.5791	0.338461	100
	NRM-AG1_BF064_Cpx3_11	49.71	1.1316	4.09	0.0474	8.73	0.1936	13.44	21.49	0.3407	0	99.1924		45.5706	39.6551	14.4498	0.32455	100
	NRM-AG1_BF064_Cpx4_1	50.96	0.7728	3.16	0.0798	8.41	0.1874	14.22	20.96	0.318	0	99.0862		44.1652	41.6907	13.8319	0.312167	100	1.05918	0.151552	98.7893	100
	NRM-AG1_BF064_Cpx4_11	51.03	0.8227	3.14	0.0601	8.27	0.2319	14.23	21.1	0.2903	0	99.1908		44.3855	41.65	13.5788	0.385645	100	0.802493	0.299284	98.8982	100
	NRM-AG1_BF064_Cpx5_1	49.83	1.0434	4.17	0.0396	8.54	0.1799	13.51	21.21	0.3231	0.0049	98.8509		45.3052	40.1526	14.2385	0.303785	100
	NRM-AG1_BF064_Cpx5_2	51.11	0.8257	3.2	0.0225	8.17	0.2104	14.13	21.27	0.3501	0.0052	99.2939		44.8036	41.4132	13.4328	0.350364	100	0.987648	0.34231	98.67	100
	NRM-AG1 Cpx (average, n=11)	50.5345	0.898364	3.50818	0.0381364	8.46545	0.204309	13.9009	21.2055	0.321136	0.00223636	99.0787		44.8164	40.8774	13.9649	0.341354	100
	%RSD	1.05074	11.6816	10.9518	64.2277	2.58554	8.66883	2.07437	0.723025	7.78836	129.787			5.79322	23.1261	16.1702	54.9105	100	8.21833	49.1761	42.6056	100
	NRM-EN2_BF064_Opx1_1	57.39	0.0092	1.0613	0.4489	7.96	0.2011	32.69	0.2611	0	0.0043	100.114		0.500979	87.2727	11.9213	0.305037	100	0	0	100	100
	NRM-EN2_BF106_Opx1_1	57.15	0	1.046	0.4835	8.08	0.1913	32.91	0.3316	0	0	100.251		0.630652	87.0871	11.9946	0.28762	100	0	0	100	100
	NRM-EN2_BF064_Opx1_2	57.04	0.0288	1.0771	0.4947	7.25	0.162	31.15	3.29	0.0151	0.0028	100.566		6.27635	82.6837	10.7956	0.244317	100	0	0.0521016	99.9479	100
	NRM-EN2_BF106_Opx1_2	57.05	0.0143	0.9969	0.3906	7.95	0.1981	32.9	0.2604	0.0068	0	99.8626		0.496953	87.3618	11.8424	0.298873	100	0	0.0234785	99.9765	100
	NRM-EN2_BF106_Opx2 <-- BF106_EN_GRAIN1	56.78	0	0.9758	0.4159	7.88	0.1769	33.06	0.2895	0.0012	0.0081	99.6762		0.550594	87.4856	11.6979	0.265974	100	0	0.00412986	99.9959	100
	NRM-EN2_BF064_Opx2_1	56.94	0.0226	1.1355	0.4426	7.97	0.1857	32.89	0.2811	0	0.0036	99.9589		0.536329	87.3142	11.8693	0.280098	100	0	0	100	100
	NRM-EN2_BF106_Opx2_1	57.1	0.0377	0.9553	0.3735	7.66	0.1736	33.03	0.393	0.0079	0.0116	99.8154		0.749042	87.5937	11.3957	0.261572	100	0	0.0272403	99.9728	100
	NRM-EN2_BF064_Opx2_2	57.26	0.0161	1.1801	0.5305	7.92	0.1674	32.95	0.2925	0.0066	0	100.404		0.557639	87.4045	11.7856	0.252296	100	0	0.0227647	99.9772	100
	NRM-EN2_BF106_Opx2_2	57.2	0.0414	1.0199	0.4218	7.82	0.1897	32.96	0.3193	0	0	100.053		0.608961	87.4639	11.6411	0.286013	100	0	0	100	100
	NRM-EN2_BF064_Opx2_3	57.26	0	1.1632	0.4704	7.84	0.1884	32.91	0.2552	0.0116	0	100.144		0.487819	87.53	11.6975	0.2847	100	0	0.0401099	99.9599	100
	NRM-EN2_BF106_Opx3_1	57.05	0.0068	0.9828	0.432	7.56	0.1999	32.29	1.65	0.0188	0.0092	100.285		3.13467	85.3545	11.2106	0.300226	100	0	0.0645913	99.9354	100
	NRM-EN2_BF106_Opx3_2	57.09	0.0252	0.9481	0.3797	7.64	0.1621	33.01	0.3526	0	0	99.6873		0.673233	87.696	11.3861	0.244678	100	0	0	100	100
	NRM-EN2 OPX (average, n=12)	57.1092	0.0168417	1.04517	0.440342	7.79417	0.183017	32.7292	0.664692	0.00566667	0.0033	99.9915		1.26771	86.8534	11.603	0.275943	100	0	0.0195539	99.9804	100
	%RSD	0.281105	85.8839	7.67313	10.9466	2.95394	7.79403	1.64524	137.475	117.097	127.069			92.7435	1.54433	1.55547	4.15672	100	0.644358	58.5746	40.781	100
	NSH6CPX_BF106_Cpx1 <-- BF106_CPX_GRAIN1	49.6	0.9228	8.66	0.0007	6.78	0.1393	14.46	16.7	1.59	0	98.8961		39.553	47.6521	12.534	0.260821	100	2.34841	4.18139	93.4702	100
	NSH6CPX_BF106_Cpx1_1	50.03	0.9244	8.8	0.0205	6.76	0.1288	14.4	16.58	1.62	0.0247	99.3205		39.4814	47.7114	12.5647	0.242467	100	1.29042	5.31917	93.3904	100
	NSH6CPX_BF106_Cpx1_2	50.07	0.94	8.92	0	6.8	0.1466	14.43	16.76	1.6	0.0111	99.7276		39.6579	47.5087	12.5592	0.274232	100	1.54334	4.9675	93.4892	100
	NSH6CPX_BF106_Cpx1_3	50.2	0.9445	8.75	0.0086	6.78	0.1382	14.52	16.76	1.56	0.0016	99.6662		39.5615	47.6888	12.4918	0.25789	100	1.11304	5.20385	93.6831	100
	NSH6CPX_BF106_Cpx2_1	50.24	0.9608	8.84	0	6.61	0.1377	14.36	16.69	1.58	0.0037	99.4486		39.7962	47.642	12.3023	0.259565	100	0.224437	6.17235	93.6032	100
	NSH6CPX_BF106_Cpx2_2	50.29	0.944	8.79	0.0079	6.75	0.1303	14.34	16.74	1.56	0.0107	99.5998		39.7962	47.4336	12.5253	0.244883	100	0.302389	6.00575	93.6919	100
	NSH6CPX_BF106_Cpx2_3	50.32	0.8809	8.83	0.0054	6.6	0.1279	14.35	16.75	1.55	0.0016	99.4379		39.9102	47.5742	12.2747	0.240917	100	0	6.2646	93.7354	100
	NSH6CPX (average, n=7)	50.1071	0.931057	8.79857	0.00615714	6.72571	0.135543	14.4086	16.7114	1.58	0.00762857	99.4118		39.6792	47.6016	12.4648	0.254422	100	0.970238	5.4487	93.5811	100
	%RSD	0.495287	2.75268	0.917321	118.776	1.24946	5.03507	0.45762	0.385377	1.59279	114.683			6.44677	10.6515	16.3146	66.5871	100	12.3687	24.1866	63.4447	100
	NSH9CPX_BF106_Cpx1_1	50.28	0.8909	8.8	0	6.68	0.1395	14.61	16.28	1.55	0.0034	99.242		38.8242	48.4785	12.4343	0.262997	100	0	6.26973	93.7303	100
	NSH9CPX_BF106_Cpx1_2	50.47	0.9188	8.71	0	6.62	0.1569	14.57	16.19	1.59	0.0078	99.2644		38.7748	48.5527	12.3754	0.297067	100	0	6.44685	93.5531	100
	NSH9CPX_BF106_Cpx1_2B	50.23	0.8592	8.77	0	6.64	0.1696	14.65	16.26	1.55	0.0054	99.1453		38.7504	48.5785	12.3516	0.319528	100	0.220683	6.05892	93.7204	100
	NSH9CPX_BF106_Cpx1_3	50.08	0.8895	8.81	0	6.68	0.1415	14.84	16.5	1.57	0.0138	99.5764		38.8471	48.6138	12.2758	0.263366	100	1.84992	4.53572	93.6144	100
	NSH9CPX_BF106_Cpx2_1	50.52	0.8868	8.81	0.0139	6.71	0.1187	14.58	16.25	1.56	0.0098	99.504		38.8126	48.4538	12.5095	0.224129	100	0	6.31677	93.6832	100
	NSH9CPX_BF106_Cpx2_2	50.17	0.8964	8.78	0.0259	6.69	0.1334	14.77	16.22	1.55	0.0099	99.2668		38.5289	48.8166	12.404	0.250507	100	0.619713	5.6656	93.7147	100
	NSH9CPX_BF106_Cpx2_3	50.4	0.8573	8.8	0	6.74	0.1492	14.73	16.46	1.6	0.0083	99.7838		38.8812	48.4131	12.427	0.278616	100	1.12313	5.35035	93.5265	100
	NSH9CPX (average, n=7)	50.3071	0.885557	8.78286	0.00568571	6.68	0.144114	14.6786	16.3086	1.56714	0.00834286	99.368		38.7743	48.5582	12.3966	0.270871	100	0.394736	5.94687	93.6584	100
	%RSD	0.322102	2.42257	0.403698	181.325	0.605008	11.4288	0.704079	0.742953	1.31364	40.2679			6.61588	8.72365	4.20519	80.4553	100	3.5953	14.5032	81.9015	100
	QJH01-1OMP_BF106_Omp1	54.04	0.1008	5.69	0.0131	10.03	0	8.65	15.42	5.09	0	99.044		43.702	34.1101	22.1879	0	100	7.74312	14.5608	77.6961	100
	QJH01-1OMP_BF064_Omp2	54.28	0.0784	5.56	0.0052	11.05	0.0192	8.19	14.92	5.31	0.0037	99.4551		42.6825	32.5999	24.6741	0.0434221	100	8.43277	14.9476	76.6196	100
	QJH01-1OMP_BF106_Omp2	54.24	0.0877	6.42	0	10.06	0.0304	8.01	14.54	5.6	0.005	99.0171		43.3236	33.208	23.3968	0.071608	100	7.78221	17.2149	75.0029	100
	QJH01-1OMP_BF064_Omp3	54.62	0.0806	6.33	0.0065	9.86	0	8.45	15.03	5.28	0.0057	99.6728		43.5861	34.0955	22.3185	0	100	6.19963	16.8421	76.9583	100
	QJH01-1OMP_BF106_Omp3	53.9	0.0751	5.59	0	10.01	0.0121	8.62	15.51	4.98	0	98.6972		43.9045	33.9512	22.1172	0.0270776	100	7.23258	14.5627	78.2047	100
	QJH01-1OMP_BF064_Omp4	54.33	0.0883	5.83	0	10.94	0.0228	8.15	14.64	5.4	0.0052	99.4158		42.3892	32.8339	24.7246	0.0521888	100	8.10713	15.735	76.1579	100
	QJH01-1OMP_BF106_Omp4	53.84	0.0858	5.67	0.0079	10.75	0.0251	8.31	15.17	5.22	0.007	99.1137		43.1662	32.9011	23.8762	0.0564625	100	9.15787	13.9672	76.875	100
	QJH01-1OMP_BF106_Omp5	53.92	0.0989	5	0	10.75	0	8.87	16.01	4.69	0.0053	99.3658		43.5735	33.5896	22.8369	0	100	7.95808	12.2998	79.7421	100
	QJH01-1OMP_BF106_Omp6	54.03	0.0994	5.98	0.0007	10.38	0.0146	8.23	14.56	5.42	0.0002	98.7149		42.6669	33.5568	23.7425	0.0338229	100	7.97062	16.1342	75.8952	100
	QJH01-1OMP_BF106_Omp7	54.18	0.0897	6.51	0.0362	9.97	0.0026	8.18	14.88	5.44	0.0095	99.3206		43.7059	33.4304	22.8576	0.00603725	100	7.66715	16.4822	75.8507	100
	QJH01-1OMP_BF106_Omp8	54.25	0.1009	5.65	0.0118	10.06	0	8.51	15.5	4.9	0	98.9827		44.0428	33.6452	22.312	0	100	5.31249	15.8818	78.8057	100
	QJH01-1OMP_BF106_Omp9	53.81	0.0464	5.7	0.0131	10.02	0.0183	8.6	15.57	5.05	0.0025	98.8399		44.0184	33.8295	22.1112	0.0409002	100	8.26745	13.9615	77.771	100
	QJH01-1OMP (average, n=12)	54.12	0.086	5.8275	0.007875	10.3233	0.0120917	8.3975	15.1458	5.19833	0.003675	99.1221		43.4009	33.4817	23.09	0.0273918	100	7.64705	15.2093	77.1436	100
	%RSD	0.442899	17.8177	7.31125	131.571	4.16139	92.9451	3.06861	3.0593	5.04969	85.9633			3.63966	5.07961	3.86434	87.4164	100	3.61129	6.54837	89.8403	100
	QLP08-1OMP_BF106_Omp1	55.99	0.066	8.56	0.0187	5.94	0.019	8.81	14.03	6.35	0.0019	99.8262		45.3463	39.6197	14.9854	0.0485474	100	3.97497	24.1836	71.8414	100
	QLP08-1OMP_BF125_Omp1	56.08	0.0245	8.88	0.0007	5.9	0.0327	8.78	13.73	6.4	0	99.8521		44.9023	39.9524	15.0608	0.0845422	100	3.38805	25.0139	71.5981	100
	QLP08-1OMP_BF106_Omp1 <-- BF106_Omp_GRAIN1	55.37	0.0425	9.08	0.0082	5.82	0.0027	8.47	13.2	6.62	0.0046	98.6185		44.7002	39.9089	15.3836	0.00722816	100	4.51	25.6516	69.8384	100
	QLP08-1OMP_BF106_Omp10	56.7	0.0057	10.33	0.02	5.92	0.0242	7.62	11.57	7.75	0	99.9423		43.1517	39.543	17.2339	0.0713523	100	4.9793	31.0736	63.9471	100
	QLP08-1OMP_BF106_Omp11	55.89	0.0383	8.97	0.0086	6.15	0.0021	8.34	13.27	6.65	0	99.3277		44.7159	39.1028	16.1757	0.0055942	100	3.86667	26.1004	70.033	100
	QLP08-1OMP_BF106_Omp12	56.63	0.0558	10.44	0.0565	5.67	0.0142	7.58	11.64	7.63	0.0014	99.7227		43.7204	39.6143	16.6231	0.0421646	100	3.44759	31.8803	64.6721	100
	QLP08-1OMP_BF106_Omp13	56.02	0.0509	8.99	0.0054	5.9	0.0163	8.57	13.16	6.68	0	99.3926		44.3062	40.1458	15.5046	0.0433835	100	3.87058	26.1749	69.9545	100
	QLP08-1OMP_BF106_Omp14	55.85	0.016	8.35	0.0133	5.91	0.0079	8.94	14.24	6.13	0.0113	99.4839		45.4976	39.7436	14.7389	0.0199542	100	3.34661	23.6972	72.9562	100
	QLP08-1OMP_BF106_Omp15	56.56	0.0566	10.02	0.0433	5.51	0.0184	7.98	12.19	7.47	0	99.8483		44.1528	40.2168	15.5777	0.0526866	100	4.61641	29.77	65.6136	100
	QLP08-1OMP_BF106_Omp16	56.46	0	9.47	0.0259	5.55	0.03	8.34	12.88	6.94	0	99.7277		44.6602	40.2367	15.0209	0.0822345	100	3.14154	28.1477	68.7108	100
	QLP08-1OMP_BF106_Omp17	56.44	0.0473	9.73	0.0427	5.16	0.011	8.55	13.3	6.61	0	99.9151		45.4969	40.6956	13.7778	0.0297475	100	1.09159	28.2624	70.646	100
	QLP08-1OMP_BF106_Omp18	56.19	0.0501	8.47	0.0093	5.82	0.0153	8.99	13.92	6.3	0.0094	99.7765		44.9271	40.372	14.6619	0.0390381	100	3.23304	24.535	72.232	100
	QLP08-1OMP_BF106_Omp2	56.24	0.0258	8.98	0.0173	5.72	0.0037	8.63	13.61	6.43	0.0138	99.6928		45.2379	39.9122	14.8402	0.00972241	100	2.15624	26.3347	71.509	100
	QLP08-1OMP_BF106_Omp3	56.34	0.0327	8.37	0.022	5.95	0.0153	9.04	13.99	6.42	0.0011	100.19		44.8045	40.2831	14.8737	0.0387367	100	4.52624	23.8187	71.655	100
	QLP08-1OMP_BF064_Omp4	57.27	0.0097	10.66	0.0139	5.26	0	7.76	11.59	7.66	0.0093	100.236		43.7476	40.7552	15.4972	0	100	1.96852	33.0575	64.974	100
	QLP08-1OMP_BF106_Omp4	56.02	0.0577	8.98	0.0259	6	0	8.52	13.55	6.64	0	99.836		45.0346	39.4001	15.5653	0	100	4.44877	25.3596	70.1916	100
	QLP08-1OMP_BF125_Omp4	55.94	0.0575	8.78	0.028	6.11	0	8.57	13.29	6.59	0.0072	99.3906		44.3245	39.7696	15.9059	0	100	3.96869	25.6163	70.415	100
	QLP08-1OMP_BF064_Omp5	56.68	0.0163	8.78	0.0185	6.47	0.0094	8.33	13.35	6.7	0.0032	100.357		44.5031	38.6372	16.835	0.0247722	100	3.28845	26.4421	70.2695	100
	QLP08-1OMP_BF106_Omp5	56.42	0.0208	10.05	0.0013	5.98	0.0258	7.75	11.98	7.36	0.0112	99.6025		43.6408	39.2815	17.0034	0.0742991	100	3.66613	30.1996	66.1343	100
	QLP08-1OMP_BF106_Omp6	56.34	0.0668	9.56	0.0293	5.41	0.041	8.49	13.32	6.7	0.0009	99.9662		45.3244	40.1964	14.3689	0.110291	100	2.48788	27.4455	70.0666	100
	QLP08-1OMP_BF106_Omp7	56.29	0.0109	9.43	0	5.41	0	8.68	13.49	6.58	0	99.8928		45.2835	40.5414	14.175	0	100	2.6062	26.6946	70.6992	100
	QLP08-1OMP_BF106_Omp8	56.03	0.0378	8.56	0	5.82	0.0074	8.86	14.25	6.22	0	99.7852		45.7811	39.6055	14.5946	0.0187945	100	3.20532	24.2039	72.5907	100
	QLP08-1OMP_BF106_Omp9	56.17	0.0174	8.72	0	5.94	0.0258	8.66	13.44	6.58	0.006	99.5746		44.5825	39.97	15.3798	0.0676571	100	3.79375	25.5951	70.6112	100
	QLP08-1OMP (average, n=23)	56.2574	0.0350913	9.22435	0.0177739	5.79652	0.0140087	8.44609	13.1735	6.75696	0.00353478	99.7252		44.7152	39.8897	15.3575	0.0375907	100	3.45497	26.8893	69.6558	100
	%RSD	0.679499	58.6745	7.49688	85.771	5.23312	83.921	5.13147	6.28216	7.08462	129.062			7.49212	8.51507	4.87141	79.1214	100	4.41177	9.43537	86.1529	100
	95AK24 (or UWC3CPX) _BF064_Di1	54.15	0.0934	1.3622	0	4.59	0.2278	14.96	24.39	0.1351	0.0058	99.9143		49.808	42.5079	7.31641	0.367764	100	0	0.496785	99.5032	100
	95AK24 (or UWC3CPX) _BF106_Di1 <-- BF106_DIOPS_GRAIN1	53.55	0.0414	0.9622	0	4.09	0.2338	15.52	24.62	0.0846	0	99.102		49.6454	43.5445	6.43743	0.372703	100	0	0.30776	99.6922	100
	95AK24 (or UWC3CPX)_BF106_Di1_1	54.48	0.0472	0.9997	0	4.16	0.2073	15.43	24.49	0.1059	0.0084	99.9285		49.6048	43.4862	6.57698	0.331942	100	0	0.386668	99.6133	100
	95AK24 (or UWC3CPX)_BF106_Di1_2	54.31	0.0478	0.8494	0	4.11	0.2568	15.57	24.6	0.0948	0.0009	99.8436		49.5218	43.6115	6.45805	0.408681	100	0	0.344161	99.6558	100
	95AK24 (or UWC3CPX)_BF106_Di1_3	54.19	0.0406	0.91	0.0046	4.13	0.2125	15.37	24.47	0.1101	0.0048	99.4445		49.6879	43.4252	6.54583	0.341117	100	0	0.402939	99.5971	100
	95AK24 (or UWC3CPX)_BF064_Di2	54.1	0.1368	1.4949	0.0094	4.71	0.2209	14.96	24.43	0.1203	0.0002	100.195		49.7594	42.3969	7.48808	0.355693	100	0	0.441453	99.5585	100
	95AK24 (or UWC3CPX)_BF106_Di2	54.42	0.0793	1.1162	0	4	0.2174	15.47	24.71	0.1291	0.0059	100.148		49.89	43.4592	6.30375	0.346999	100	0	0.469475	99.5305	100
	95AK24 (or UWC3CPX)_BF064_Di3	54.13	0.0891	1.2091	0.002	4.37	0.2158	15.23	24.54	0.1278	0	99.9186		49.7642	42.9728	6.91707	0.345957	100	0	0.4668	99.5332	100
	95AK24 (or UWC3CPX)_BF106_Di3_1	54.05	0.0628	0.9705	0	4.17	0.2126	15.36	24.29	0.1164	0.0051	99.2374		49.4858	43.5407	6.63113	0.342408	100	0	0.427303	99.5727	100
	95AK24 (or UWC3CPX)_BF106_Di3_2	54.35	0.0847	1.0279	0.0094	4.15	0.2147	15.39	24.39	0.1189	0.0035	99.7502		49.5605	43.5124	6.58219	0.344893	100	0	0.435312	99.5647	100
	95AK24 (or UWC3CPX)_BF064_Di4	54.27	0.0682	1.4059	0	4.6	0.2165	14.97	24.5	0.1359	0	100.166		49.9074	42.4299	7.31401	0.348646	100	0	0.498468	99.5015	100
	95AK24 (or UWC3CPX)_BF064_Di8	54.11	0.1028	1.3399	0	4.47	0.1954	15.02	24.49	0.1082	0	99.8382		49.9467	42.6225	7.1158	0.315043	100	0	0.397744	99.6023	100
	95AK24 (or UWC3CPX)_BF064_Di9	53.88	0.1267	1.7214	0	4.68	0.1991	14.91	24.41	0.1449	0	100.072		49.8508	42.3675	7.46017	0.321443	100	0	0.532651	99.4673	100
	95AK24 (or UWC3CPX) CPX (average, n=13)	54.1531	0.0785231	1.18225	0.00195385	4.32538	0.217738	15.2431	24.4869	0.117846	0.00266154	99.8094		49.7253	43.0692	6.85593	0.349548	100	0	0.431193	99.5688	100
	%RSD	0.449389	39.8903	22.3267	182.306	5.85686	7.16276	1.60369	0.457005	14.5389	113.274			3.53653	17.2674	35.3769	43.8192	100	13.1894	62.7175	24.0931	100
	Session-230523
	BF132_1594CPX_Hd1-1	50.78	0.0829	1.1219	0	16.01	0.8001	8.05	22.06	1.1559	0.0004	100.061		47.5536	24.1448	26.9381	1.36348	100
	BF132_1594CPX_Hd10-1	50.59	0.0966	1.7406	0	16.22	0.6954	7.51	21.63	1.39	0	99.8726		47.7593	23.0724	27.9544	1.21385	100
	BF132_1594CPX_Hd11-1	49.96	0.1089	1.96	0.0098	15.98	0.7422	7.63	22.07	1.38	0.0011	99.8444		48.2444	23.2071	27.2659	1.28261	100
	BF132_1594CPX_Hd11-2	50.8	0.0502	1.0187	0	15.88	0.8322	8.04	22.2	1.1183	0.0098	99.9707		47.8038	24.0889	26.6906	1.41666	100
	BF132_1594CPX_Hd2-1	50.09	0.1314	2.09	0.011	16.67	0.7401	7.45	21.37	1.52	0	100.075		47.1404	22.8663	28.7027	1.29065	100
	BF132_1594CPX_Hd3-1	49.95	0.1283	2.03	0	16.3	0.7486	7.58	21.72	1.51	0	99.9669		47.6509	23.1383	27.9124	1.29834	100
	BF132_1594CPX_Hd4-1	50.5	0.0476	1.5504	0	16.05	0.801	7.87	21.85	1.3389	0	100.009		47.54	23.825	27.2572	1.37774	100
	BF132_1594CPX_Hd4-2	50.38	0.1052	1.7688	0.0149	16.53	0.7107	7.71	21.57	1.41	0.0091	100.21		47.1352	23.4423	28.1947	1.22775	100
	BF132_1594CPX_Hd6-1	50.55	0.1075	1.6769	0.0207	16.1	0.7407	7.77	21.75	1.5	0	100.216		47.5789	23.6498	27.4903	1.28093	100
	BF132_1594CPX_Hd8-1	50.32	0.1023	1.94	0	16.19	0.733	7.63	21.64	1.37	0.0007	99.9411		47.5888	23.3466	27.7903	1.27432	100
	BF132_1594CPX_Hd9-1	50.38	0.0844	1.7747	0	16.28	0.7216	7.59	21.74	1.46	0.001	100.032		47.698	23.1704	27.88	1.2516	100
	1594CPX (average, n=11)	50.3909	0.0950273	1.69745	0.00512727	16.2009	0.751418	7.71182	21.7818	1.37755	0.00200909	100.014		47.6089	23.4532	27.6396	1.29839	100
	%RSD	0.58584	28.7341	20.5717	148.325	1.4686	5.60118	2.61075	1.12845	9.70491	184.438			10.9184	35.1472	11.0912	42.8432	100	4.28506	61.3651	34.3499	100
	BF132_1984HD_Hd1-1	47.84	0.0352	0.4916	0.0057	23.94	3.32	1.0054	22.86	0.2048	0	99.7061		50.1648	3.06982	41.0058	5.75956	100
	BF132_1984HD_Hd1-2	48.18	0.0243	0.3023	0	24.39	3.73	0.9856	22.43	0.2209	0	100.272		48.987	2.99505	41.5779	6.44005	100
	BF132_1984HD_Hd10-1	47.83	0.0146	0.4847	0	25.02	2.59	0.9787	22.68	0.2403	0	99.8397		49.7166	2.9851	42.8099	4.48835	100
	BF132_1984HD_Hd2-1	47.88	0.0401	0.316	0	24.17	3.34	1.1679	23	0.1933	0	100.124		49.8578	3.52259	40.8959	5.72373	100
	BF132_1984HD_Hd3-1	47.72	0.0104	0.3503	0.0177	24.52	3.46	1.0605	22.28	0.2265	0.0027	99.6481		48.8277	3.2338	41.944	5.99453	100
	BF132_1984HD_Hd4-1	47.64	0.048	0.6358	0.0221	24.76	3.22	0.9745	22.57	0.1681	0	100.047		49.2819	2.96066	42.1992	5.55827	100
	BF132_1984HD_Hd4-2	47.84	0.014	0.3862	0.0107	24.15	3.25	1.3223	22.73	0.1929	0	99.8961		49.4245	4.00059	40.9882	5.58669	100
	BF132_1984HD_Hd5-1	47.84	0.0236	0.4541	0.0032	24.62	2.74	1.1484	22.86	0.2102	0	99.8995		49.868	3.4857	41.9211	4.72525	100
	BF132_1984HD_Hd6-1	48.05	0.0109	0.4553	0.0088	24.69	2.79	1.1913	22.81	0.2311	0	100.243		49.6465	3.60774	41.9452	4.8006	100
	BF132_1984HD_Hd7-1	47.93	0.04	0.4525	0.0095	24.84	2.83	1.034	23.03	0.195	0	100.397		49.9623	3.12119	42.0629	4.85359	100
	BF132_1984HD_Hd8-1	47.82	0.0276	0.2138	0	24.01	3.65	1.1739	22.64	0.1704	0	99.7057		49.3249	3.55854	40.8301	6.28652	100
	BF132_1984HD_Hd9-1	47.61	0.0207	0.4004	0	24.61	3.03	1.1212	22.96	0.1894	0.002	99.9437		49.7782	3.38221	41.6464	5.19323	100
	1984HD (average, n=12)	47.8483	0.0257833	0.411917	0.006475	24.4767	3.1625	1.09698	22.7375	0.203575	0.000391667	99.9701		49.5704	3.32757	41.6515	5.45053	100
	%RSD	0.331268	48.885	26.6075	116.274	1.40842	11.6323	9.869	1.01339	11.3092	236.638			4.04704	54.8383	4.39028	36.7244	100	2.47563	43.6111	53.9133	100
	BF132_22779HD_HdA1-1	47.35	0	0.5649	0.0051	21.13	7.4	0.9286	22.2	0.0156	0	99.5942		48.4346	2.81892	35.9832	12.7633	100
	BF132_22779HD_HdA2-1	47.43	0.0106	0.4642	0	20.44	7.82	0.9027	22.2	0.0167	0	99.2842		48.6923	2.75487	34.9934	13.5594	100
	BF132_22779HD_HdA3-1	47.33	0.0016	0.4936	0	20.95	7.23	0.782	22.2	0.0008	0	98.9904		48.9459	2.39895	36.0534	12.6017	100
	BF132_22779HD_HdA4-1	47.44	0.0028	0.5048	0	20.94	7.21	0.8403	22.21	0	0	99.1479		48.8952	2.57397	35.9826	12.5482	100
	BF132_22779HD_HdB11-1	47.78	0.0149	0.5427	0	20.6	7.78	0.8268	22.19	0	0	99.7358		48.6942	2.52448	35.2846	13.4967	100
	BF132_22779HD_HdB12-1	47.52	0	0.5568	0	20.89	7.59	0.7938	22.34	0.0253	0	99.7159		48.8302	2.41417	35.6404	13.1152	100
	BF132_22779HD_HdB13-1	47.88	0	0.1963	0.0013	19.65	9.1	0.5756	22.4	0	0	99.8032		48.9804	1.75124	33.5378	15.7305	100
	BF132_22779HD_HdB14-1	46.92	0.0307	0.368	0.0108	20.99	7.34	0.7727	22.22	0	0.0012	98.6534		48.8551	2.36389	36.0228	12.7582	100
	BF132_22779HD_HdB15-1	47.41	0.0052	0.4226	0.0279	20.91	7.32	0.9592	22.36	0.0482	0	99.4631		48.8181	2.91387	35.6338	12.6342	100
	BF132_22779HD_HdC21-1	47.75	0	0.3523	0	20.51	8.69	0.6236	22.24	0.0041	0	100.17		48.362	1.8868	34.8124	14.9389	100
	BF132_22779HD_HdC22-1	47.75	0.0037	0.604	0.0114	20.76	7.82	0.7487	22.16	0	0	99.8718		48.6093	2.28512	35.5448	13.5608	100
	BF132_22779HD_HdC23-1	47.67	0.007	0.3749	0	21.35	7.56	0.8659	21.98	0.0136	0	99.831		47.964	2.6291	36.3651	13.0418	100
	BF132_22779HD_HdC24-1	47.19	0	0.6727	0	21.47	6.98	0.7639	22.41	0.0017	0	99.4883		48.9844	2.32329	36.6308	12.0615	100
	BF132_22779HD_HdC25-1	47.11	0	0.6483	0	21.06	6.99	0.8973	22.26	0	0	98.9656		48.9524	2.7456	36.1498	12.1522	100
	BF132_22779HD_HdC26-1	47.07	0	0.7191	0	21.16	7.21	0.6642	22.22	0.0356	0.0026	99.0815		48.9855	2.03739	36.4114	12.5657	100
	BF132_22779HD_HdC27-1	47.21	0.0026	0.7322	0.0006	21.23	7.06	0.8358	22.31	0.0121	0.0015	99.4444		48.8984	2.54888	36.3198	12.2329	100
	BF132_22779HD_HdC28-1	46.99	0.0025	0.7451	0	21.22	7.54	0.7468	22.3	0	0	99.5444		48.6231	2.26565	36.1145	12.9968	100
	22779HD (average, n=17)	47.4	0.0048	0.527206	0.00335882	20.8976	7.56706	0.795759	22.2471	0.0102176	0.000311765	99.4534		48.7361	2.42555	35.7334	13.1049	100
	%RSD	0.621558	164.564	29.0683	218.437	2.04876	7.55504	13.2302	0.463267	141.189	237.846			1.75191	69.6144	6.04742	22.5863	100	0.570425	90.5675	8.86211	100
	BF132_24516HD_Hd1-1	47.92	0	0.3477	0.0032	21.53	7.01	0.2541	22.79	0.0133	0	99.8683		50.0984	0.777205	36.9422	12.1822	100
	BF132_24516HD_Hd2-1c	47.99	0	0.1012	0	22.24	6.27	0.2473	22.94	0.0051	0.0009	99.7998		50.3068	0.754586	38.0686	10.87	100
	BF132_24516HD_Hd2-1r	48.13	0.0079	0.1556	0	22.3	6.06	0.2506	22.96	0	0.0027	99.8668		50.4554	0.766245	38.2506	10.5278	100
	BF132_24516HD_Hd3-1	47.9	0.0175	0.1555	0	22.95	5.85	0.3322	23.01	0.0087	0	100.224		50.0104	1.0046	38.9336	10.0514	100
	BF132_24516HD_Hd3-2	47.64	0.008	0.1482	0	22.85	5.96	0.3522	23.04	0.0026	0	100.017		50.0031	1.06354	38.7078	10.2256	100
	BF132_24516HD_Hd4-1	47.6	0	0.2328	0	21.03	7.67	0.2229	23.04	0.0215	0	99.8172		50.2744	0.676745	35.818	13.2308	100
	BF132_24516HD_Hd5-1	47.59	0	0.1336	0	22.76	5.94	0.3239	22.85	0.03	0	99.64		49.9325	0.984825	38.8211	10.2615	100
	BF132_24516HD_Hd5-2	47.42	0	0.147	0.0164	22.72	5.93	0.3083	22.87	0.0485	0	99.4602		50.0209	0.93823	38.7875	10.2534	100
	BF132_24516HD_Hd6-1	47.63	0.0031	0.1946	0	21.59	6.5	0.5659	23.2	0.0064	0	99.691		50.459	1.71254	36.6523	11.1761	100
	BF132_24516HD_Hd7-1	47.49	0	0.1811	0	21.78	6.3	0.528	23.2	0.0159	0	99.5008		50.5277	1.60002	37.0252	10.847	100
	BF132_24516HD_Hd8-1	48.22	0	0.1136	0.0182	22.74	6.01	0.3126	22.84	0.0185	0	100.273		49.8954	0.950177	38.7751	10.3793	100
	BF132_24516HD_Hd8-2	48.1	0.0097	0.1265	0.0334	23.15	5.9	0.2703	22.8	0.0222	0	100.412		49.6624	0.8192	39.3589	10.1595	100
	BF132_24516HD_Hd9-1	47.88	0.0084	0.3675	0	22.17	6.54	0.1967	22.64	0.0102	0	99.8138		49.8804	0.602988	38.1257	11.3909	100
	24516HD (average, n=13)	47.8085	0.0042	0.184992	0.00547692	22.2931	6.30308	0.320385	22.9369	0.0156077	0.000276923	99.8725		50.1174	0.974039	38.0209	10.8877	100
	%RSD	0.546902	133.56	45.465	192.656	2.90397	8.4022	34.5068	0.7069	84.068	277.826			1.22665	83.314	3.93326	11.5261	100	1.09241	72.2264	26.6812	100
	BF132_37087HD_Hd1-1	49.26	0.0859	0.5017	0.0147	21.38	1.2603	4.22	23.07	0.1417	0.0082	99.991		49.4787	12.5931	35.7913	2.13685	100
	BF132_37087HD_Hd10-1	48.93	0.0853	0.4566	0.0147	21.27	1.2414	4.45	23.15	0.1088	0	99.7505		49.3337	13.1948	35.3801	2.09138	100
	BF132_37087HD_Hd2-1	49.46	0.0818	0.3165	0	21.54	1.2894	4.23	23.34	0.1012	0	100.426		49.5985	12.5072	35.7282	2.16612	100
	BF132_37087HD_Hd3-1	49.63	0.009	0.4007	0	21.07	1.0319	4.56	23.57	0.162	0	100.453		49.9612	13.449	34.8607	1.72917	100
	BF132_37087HD_Hd4-1	49.22	0.1552	0.9065	0.0038	21.16	1.1741	4.46	23.2	0.1554	0.0068	100.46		49.5196	13.2457	35.2536	1.98117	100
	BF132_37087HD_Hd4-2	49.06	0.1388	0.9121	0	21.15	1.1339	4.63	23.14	0.1534	0	100.341		49.2475	13.7105	35.1342	1.90776	100
	BF132_37087HD_Hd5-1	49.2	0.0858	0.5437	0.0083	21.24	1.2524	4.42	23.19	0.1277	0.0079	100.1		49.4363	13.1105	35.3426	2.11065	100
	BF132_37087HD_Hd5-2	49.35	0.0433	0.547	0.0058	21.49	1.2762	4.42	23.18	0.1066	0.005	100.463		49.2011	13.0537	35.6038	2.14145	100
	BF132_37087HD_Hd6-1	49.36	0.0718	0.3465	0	21.41	1.252	4.23	23.45	0.0819	0.0035	100.242		49.8545	12.5128	35.5285	2.10423	100
	BF132_37087HD_Hd7-1	49.12	0.0692	0.7117	0.0058	21.15	1.2523	4.27	23.71	0.1525	0	100.462		50.2865	12.6008	35.013	2.0997	100
	BF132_37087HD_Hd8-1	49.19	0.0892	0.5032	0.0032	21.26	1.2899	4.42	23.4	0.1319	0.0009	100.31		49.614	13.0395	35.1844	2.16208	100
	BF132_37087HD_Hd9-1	49.44	0.0445	0.6055	0.0019	20.75	1.1284	4.45	23.91	0.1438	0	100.538		50.6674	13.1208	34.3214	1.89034	100
	37087HD (average, n=12)	49.2683	0.0799833	0.562642	0.00485	21.2392	1.21518	4.39667	23.3592	0.130575	0.00269167	100.259		49.684	13.0117	35.261	2.04329	100
	%RSD	0.389541	49.3366	34.6067	110.226	0.997659	6.61479	3.03036	1.11237	19.587	126.241			9.81203	37.1923	6.86892	46.1267	100	1.69275	75.3565	22.9508	100
	BF132_97SL65CPX_Di1-1	55.14	0.0503	1.148	0.0333	1.64	0.0021	16.99	25.49	0.5557	0	101.085		50.5638	46.8936	2.53929	0.00329319	100	1.8276	0.163927	98.0085	100
	BF132_97SL65CPX_Di2-1	55.05	0.0415	1.1596	0.0238	1.71	0	16.9	25.5	0.5978	0.0014	101.019		50.6462	46.7029	2.65095	0	100
	BF132_97SL65CPX_Di4-1	55.22	0.0258	1.2027	0.0313	1.75	0.0228	16.99	25.4	0.6055	0.0078	101.256		50.373	46.8823	2.70895	0.035746	100	2.13389	0.0383143	97.8278	100
	BF132_97SL65CPX_Di5-1	55.13	0.0307	1.1563	0.0272	1.73	0.0037	17.01	25.38	0.7024	0	101.17		50.3562	46.9588	2.67921	0.00580352	100
	BF132_97SL65CPX_Di6-1	55.1	0.0308	1.0691	0.0361	1.45	0.0122	17.14	25.44	0.6737	0.0008	100.998		50.4462	47.2904	2.24428	0.0191249	100	2.2404	0.172921	97.5867	100
	97SL65CPX (average, n=5)	55.128	0.03582	1.14714	0.03034	1.656	0.00816	17.006	25.442	0.62702	0.002	101.082		50.477	46.9457	2.56449	0.0127986	100
	%RSD	0.112845	27.6983	4.22971	16.1042	7.39087	115.263	0.506865	0.208724	9.52399	164.773			0.213411	0.721085	5.89845	93.1671	100	5.27951	10.4932	84.2272	100
	BF132_R1213_Hd1-1	47.69	0.0111	0.3668	0.0038	20.96	8.86	0.2063	21.89	0.0491	0	100.061		48.066	0.630293	35.9238	15.3799	100
	BF132_R1213_Hd1-2	47.52	0.0378	0.5032	0.0114	21.9	7.53	0.2667	21.93	0.0147	0	99.7138		48.3595	0.818309	37.6952	13.127	100
	BF132_R1213_Hd2-1	47.59	0.0382	0.539	0	21.8	7.72	0.3131	22	0.0049	0	100.005		48.2937	0.956317	37.3528	13.3972	100
	BF132_R1213_Hd2-2	47.04	0.0394	0.5508	0.0107	21.99	7.5	0.2618	21.84	0.0243	0	99.2642		48.2145	0.804166	37.8921	13.0892	100
	BF132_R1213_Hd3-1	47.63	0.034	0.4763	0	22.16	7.43	0.2863	21.97	0.0334	0	100.025		48.2443	0.874759	37.9826	12.8983	100
	BF132_R1213_Hd4-1	47.78	0.0145	0.4192	0	21.42	8.06	0.2282	21.88	0.0388	0	99.8455		48.3124	0.701096	36.9172	14.0694	100
	BF132_R1213_Hd4-2	47.83	0.0424	0.4873	0	21.83	7.43	0.2827	21.98	0.0151	0	99.9018		48.5355	0.868578	37.6256	12.9703	100
	BF132_R1213_Hd5-1	47.62	0.0269	0.5297	0.0038	21.78	7.64	0.2781	21.95	0.0434	0	99.8729		48.3725	0.852739	37.4645	13.3102	100
	BF132_R1213_Hd6-1	47.31	0.0117	0.427	0	21.98	7.46	0.2606	21.83	0.0156	0	99.2949		48.2468	0.801384	37.9176	13.0341	100
	BF132_R1213_Hd6-2	47.26	0.0286	0.518	0	21.86	7.71	0.2636	21.77	0.0384	0	99.4486		48.0631	0.809748	37.6705	13.4566	100
	BF132_R1213_Hd7-1	47.67	0.0141	0.4641	0.0209	21.45	8.04	0.2484	21.94	0.0405	0	99.9164		48.3427	0.761547	36.8909	14.0048	100
	BF132_R1213_Hd7-2	47.68	0.0151	0.5058	0	22	7.58	0.2721	22.05	0.0484	0	100.172		48.3627	0.830389	37.6637	13.1432	100
	BF132_R1213_Hd8-1	47.82	0.0201	0.4493	0	21.6	8.12	0.2653	22	0.0363	0.0049	100.327		48.1947	0.808658	36.9342	14.0624	100
	BF132_R1213_Hd8-2	47.89	0.0216	0.4218	0	22.37	7.46	0.2745	21.9	0.0262	0	100.367		47.984	0.836846	38.2575	12.9217	100
	R1213 HD (average, n=14)	47.595	0.0253929	0.475593	0.00361429	21.7929	7.75286	0.264836	21.9236	0.03065	0.00035	99.8647		48.2564	0.811094	37.4418	13.4907	100
	%RSD	0.507326	44.7197	11.2642	176.205	1.60461	5.15503	9.65663	0.350866	45.4876	374.166			1.83557	70.292	6.55236	21.3201	100	1.25025	80.9191	17.8306	100
	IG-CAS (Guiyang)
	Session-231018
	BF132_1594CPX_Hd1-1	51.219	0.055	1.298	0.003	15.839	0.752	8.194	21.243	1.302	0.005	99.91		46.5838	25.0015	27.111	1.30366	100
	BF132_1594CPX_Hd1-2	50.725	0.088	1.988	0	15.86	0.669	7.814	20.87	1.583	0	99.597		46.7406	24.3498	27.7251	1.18448	100
	BF132_1594CPX_Hd10-1	51.434	0.024	1.777	0.017	16.088	0.681	7.869	21.077	1.489	0.001	100.457		46.7115	24.2653	27.8301	1.19314	100	5.49492	0.449922	94.0552	100
	BF132_1594CPX_Hd11-1	50.742	0.127	2.005	0	15.463	0.722	7.996	21.2	1.338	0.001	99.594		47.1468	24.7423	26.8416	1.26935	100	5.24585	0.131756	94.6224	100
	BF132_1594CPX_Hd11-2	51.492	0.061	1.076	0.005	15.505	0.746	8.241	21.54	1.185	0	99.887		47.1349	25.0916	26.483	1.29052	100	4.1011	0.564893	95.334	100
	BF132_1594CPX_Hd2-1	50.635	0.088	2.106	0	16.598	0.696	7.533	20.647	1.586	0	99.893		46.2583	23.4829	29.026	1.23274	100
	BF132_1594CPX_Hd2-2	50.615	0.116	2.142	0	16.24	0.714	7.629	20.665	1.56	0	99.71		46.4168	23.8429	28.4724	1.26785	100
	BF132_1594CPX_Hd2-3	50.521	0.153	2.155	0	16.36	0.71	7.589	20.761	1.644	0.003	99.917		46.4958	23.6484	28.5988	1.25705	100
	BF132_1594CPX_Hd3-1	51.33	0.166	2.024	0	16.07	0.722	7.841	21.192	1.572	0.004	100.946		46.8683	24.1284	27.7409	1.26233	100
	BF132_1594CPX_Hd3-2	50.672	0.064	2.072	0	15.945	0.713	7.646	20.962	1.596	0.001	99.671		46.9894	23.848	27.8991	1.26353	100
	BF132_1594CPX_Hd4-1	52.515	0.066	1.618	0	15.794	0.727	8.178	21.472	1.535	0	101.905		46.9297	24.8699	26.9442	1.25614	100	4.8573	1.14441	93.9983	100
	BF132_1594CPX_Hd4-2	51.121	0.036	1.829	0.002	15.762	0.68	7.834	21.034	1.491	0	99.82		46.9774	24.3445	27.4775	1.20062	100	5.40008	0.590411	94.0095	100
	BF132_1594CPX_Hd5-1	41.478	0.062	10.862	0	21.309	0.53	7.958	11.2	1.258	1.7	96.373		28.4811	28.1574	42.296	1.06547	100					outlier; rejected
	BF132_1594CPX_Hd5-2	42.585	0.05	9.627	0	20.847	0.603	8.796	11.004	1.709	1.571	96.824		27.5159	30.6033	40.6888	1.19201	100					outlier; rejected
	BF132_1594CPX_Hd6-1	51.095	0.043	1.554	0	15.943	0.702	8.042	21.114	1.506	0	99.999		46.6064	24.6996	27.469	1.22501	100
	BF132_1594CPX_Hd7-1	42.732	0	9.639	0	20.579	0.558	9.112	11.115	1.295	1.599	96.629		27.5824	31.4621	39.8608	1.09468	100					outlier; rejected
	BF132_1594CPX_Hd8-1	51.123	0.013	1.939	0	15.74	0.722	7.79	20.81	1.502	0.005	99.644		46.7582	24.3542	27.6051	1.28248	100	4.95401	1.08686	93.9591	100
	BF132_1594CPX_Hd9-1	50.959	0.15	2.006	0	15.609	0.7	7.8	20.97	1.607	0	99.801		47.0603	24.3558	27.342	1.24189	100	6.05084	0.446252	93.5029	100
	1594CPX (average, n=15 out of 18)	51.0799	0.0833333	1.83927	0.0018	15.9211	0.7104	7.8664	21.0371	1.49973	0.00133333	100.04		46.7792	24.3385	27.6335	1.24881	100	5.92802	0.100786	93.9712	100
	%RSD	0.991084	58.6646	17.4852	247.741	1.96392	3.27663	2.84277	1.26979	8.55776	143.614			13.5828	42.3109	16.3977	27.7086	100	6.57857	59.881	33.5404	100
	BF132_1984HD_Hd1-1	49.004	0	0.519	0	23.827	3.421	1.01	22.244	0.197	0	100.222		49.4841	3.12626	41.3733	6.01636	100	0	0.786824	99.2132	100
	BF132_1984HD_Hd1-2	49.039	0.071	0.269	0	23.773	3.706	1.171	21.776	0.238	0	100.043		48.5086	3.62951	41.3355	6.52641	100	0	0.950298	99.0497	100
	BF132_1984HD_Hd10-1	48.992	0.025	0.463	0	24.476	2.638	1.016	22.23	0.219	0.001	100.066		49.5832	3.15311	42.6122	4.65155	100	0	0.876206	99.1238	100
	BF132_1984HD_Hd10-2	48.88	0.034	0.421	0	23.952	3.023	1.032	22.255	0.196	0	99.793		49.7025	3.20687	41.7533	5.33725	100	0	0.785904	99.2141	100
	BF132_1984HD_Hd2-1	48.951	0	0.276	0	23.5	3.49	1.056	22.301	0.163	0	99.737		49.699	3.27445	40.878	6.14861	100	0	0.653062	99.3469	100
	BF132_1984HD_Hd2-2	48.658	0	0.318	0	23.736	3.49	1.162	22.194	0.222	0	99.784		49.2141	3.58518	41.0828	6.11797	100
	BF132_1984HD_Hd3-1	48.717	0.028	0.328	0	24.303	3.407	1.064	21.775	0.221	0	99.843		48.4767	3.29585	42.2312	5.99619	100	0.507576	0.379388	99.113	100
	BF132_1984HD_Hd3-2	48.905	0.042	0.209	0	24.67	3.58	1.006	21.568	0.249	0	100.233		47.8715	3.10682	42.74	6.28171	100	0.620093	0.376272	99.0036	100
	BF132_1984HD_Hd4-1	48.649	0	0.501	0	23.786	3.359	0.997	21.983	0.113	0	99.388		49.2984	3.11094	41.6357	5.95503	100	0	0.456485	99.5435	100
	BF132_1984HD_Hd4-2	48.895	0	0.36	0	23.687	3.092	1.392	22.206	0.177	0	99.821		49.2635	4.2968	41.0169	5.42278	100	0.178024	0.528805	99.2932	100
	BF132_1984HD_Hd5-1	48.489	0	0.397	0	24.05	2.671	1.128	22.235	0.213	0.005	99.189		49.7559	3.5121	42.0069	4.72508	100	0.477044	0.382194	99.1408	100
	BF132_1984HD_Hd5-2	48.425	0.038	0.526	0	24.998	2.505	0.939	22.132	0.265	0.005	99.833		49.2578	2.90784	43.4268	4.40748	100
	BF132_1984HD_Hd6-1	49.026	0	0.454	0	24.262	2.736	1.169	22.208	0.257	0	100.12		49.4224	3.61976	42.1444	4.81347	100	0.236333	0.790478	98.9732	100
	BF132_1984HD_Hd6-2	48.705	0	0.457	0.025	24.737	2.582	1.142	22.015	0.214	0	99.877		48.9728	3.53471	42.9518	4.54068	100	0.597864	0.261352	99.1408	100
	BF132_1984HD_Hd7-2	48.46	0.004	0.433	0	23.878	2.826	1.013	22.261	0.203	0	99.078		49.9771	3.16436	41.8429	5.01564	100	0.0990306	0.719762	99.1812	100
	BF132_1984HD_Hd8-1	48.528	0.067	0.355	0	23.319	3.753	1.147	21.743	0.237	0	99.149		48.8525	3.58577	40.8955	6.66614	100	0.0551283	0.89982	99.0451	100
	BF132_1984HD_Hd8-2	48.733	0	0.253	0	23.588	3.508	1.228	22.049	0.125	0	99.491		49.0606	3.80183	40.9669	6.17066	100	0	0.500798	99.4992	100
	BF132_1984HD_Hd9-1	48.816	0	0.401	0	24.229	2.652	1.135	22.256	0.239	0	99.793		49.6303	3.52165	42.1729	4.67521	100	0.324458	0.633894	99.0416	100
	BF132_1984HD_Hd9-2	48.452	0.008	0.443	0.045	24.229	2.848	1.254	22.182	0.225	0	99.72		49.1948	3.86961	41.9423	4.99329	100
	1984HD (average, n=19)	48.7539	0.0166842	0.388579	0.00368421	24.0526	3.12037	1.10847	22.0849	0.209105	0.000578947	99.7389		49.2217	3.43746	41.843	5.49788	100	0.244714	0.593645	99.1616	100
	%RSD	0.434355	141.936	24.0683	312.903	1.86588	13.6151	9.9639	0.984124	19.5352	271.986			3.6358	51.2189	5.38061	39.7647	100	2.38901	55.5997	42.0113	100
	BF132_22779HD_HdA1-1	48.556	0.043	0.529	0	20.533	7.257	0.949	21.555	0.041	0	99.463		48.287	2.95801	35.9031	12.8519	100	0	0.165933	99.8341	100
	BF132_22779HD_HdA2-1	48.383	0	0.422	0	20.196	8.022	0.936	21.483	0.065	0	99.525		47.8559	2.90113	35.1159	14.127	100	0	0.26134	99.7387	100
	BF132_22779HD_HdA3-1	48.591	0	0.497	0	20.854	7.127	0.885	21.792	0.033	0.002	99.781		48.4966	2.74036	36.2245	12.5386	100	0	0.132721	99.8673	100
	BF132_22779HD_HdA3-2	48.589	0	0.485	0	20.73	6.844	0.904	21.638	0.023	0.003	99.216		48.6389	2.82739	36.3717	12.162	100	0	0.0934711	99.9065	100
	BF132_22779HD_HdA4-1	48.347	0.001	0.501	0	20.949	7.15	0.83	21.693	0.054	0	99.525		48.3658	2.57483	36.457	12.6024	100	0	0.217399	99.7826	100
	BF132_22779HD_HdB11-1	48.332	0.024	0.533	0	20.087	7.522	0.747	21.727	0.042	0	99.028		48.9438	2.34137	35.3193	13.3955	100	0	0.17092	99.8291	100
	BF132_22779HD_HdB12-1	48.511	0	0.595	0	20.22	7.281	0.807	21.731	0.018	0	99.163		48.952	2.52939	35.5525	12.9661	100	0	0.0733219	99.9267	100
	BF132_22779HD_HdB12-2	48.262	0	0.581	0	20.376	7.699	0.794	21.703	0.038	0	99.453		48.4457	2.46608	35.502	13.5862	100	0	0.153265	99.8467	100
	BF132_22779HD_HdB13-1	48.64	0	0.238	0	19.148	8.707	0.643	21.983	0.028	0.002	99.389		49.1714	2.00119	33.4309	15.3965	100	0	0.113209	99.8868	100
	BF132_22779HD_HdB13-2	48.541	0.024	0.543	0	20.159	7.416	0.878	21.798	0.027	0	99.402		48.8554	2.73805	35.2666	13.14	100	0	0.109389	99.8906	100
	BF132_22779HD_HdB14-1	48.69	0	0.366	0	20.555	7.264	0.747	21.623	0.045	0.007	99.297		48.6467	2.33835	36.0955	12.9194	100	0	0.182871	99.8171	100
	BF132_22779HD_HdB14-2	48.472	0	0.338	0	20.677	7.198	0.757	21.583	0.015	0	99.04		48.5382	2.36875	36.2959	12.7971	100	0	0.0610081	99.939	100
	BF132_22779HD_HdB15-1	48.535	0.013	0.448	0	20.861	7.21	0.953	21.751	0.053	0	99.824		48.2714	2.94276	36.1363	12.6495	100	0	0.212399	99.7876	100
	BF132_22779HD_HdB15-2	48.621	0	0.375	0	20.786	7.21	0.93	21.695	0.026	0	99.658		48.3042	2.88111	36.1239	12.6908	100	0	0.104649	99.8954	100
	BF132_22779HD_HdC21-1	48.691	0	0.353	0	19.845	8.623	0.594	21.558	0.045	0	99.709		48.2376	1.84933	34.6598	15.2533	100	0	0.181881	99.8181	100
	BF132_22779HD_HdC22-1	49.183	0.035	0.587	0	20.535	7.85	0.714	22.022	0.02	0	101.007		48.6677	2.1955	35.4223	13.7145	100	0	0.07992	99.9201	100
	BF132_22779HD_HdC23-1	48.716	0.013	0.414	0	21.017	7.411	0.833	21.522	0.065	0	100.005		47.8857	2.57881	36.5	13.0355	100	0	0.26103	99.739	100
	BF132_22779HD_HdC24-1	48.093	0	0.689	0	21.354	6.913	0.821	21.72	0.03	0	99.676		48.2719	2.5388	37.0435	12.1459	100
	BF132_22779HD_HdC24-2	48.293	0	0.673	0	20.836	6.961	0.856	21.695	0.027	0	99.341		48.5863	2.66734	36.4223	12.3241	100	0	0.109303	99.8907	100
	BF132_22779HD_HdC25-1	48.557	0	0.652	0	20.711	7.044	0.858	21.891	0.031	0	99.756		48.8428	2.66362	36.069	12.4246	100	0	0.125009	99.875	100
	BF132_22779HD_HdC25-2	48.845	0.008	0.688	0	21.147	7.002	0.896	22.048	0.037	0	100.687		48.6321	2.74987	36.4083	12.2097	100	0	0.14747	99.8525	100
	BF132_22779HD_HdC26-1	48.259	0	0.724	0	21.006	7.126	0.661	21.748	0.05	0	99.578		48.6562	2.05765	36.6826	12.6035	100	0	0.202022	99.798	100
	BF132_22779HD_HdC27-1	48.417	0	0.721	0	20.791	6.99	0.784	21.752	0.027	0	99.497		48.7745	2.44602	36.3887	12.3908	100	0	0.109439	99.8906	100
	BF132_22779HD_HdC27-2	48.688	0	0.708	0	20.941	7.224	0.831	21.901	0.004	0	100.314		48.5464	2.56298	36.2317	12.659	100	0	0.0160425	99.984	100
	BF132_22779HD_HdC28-1	48.046	0	0.736	0	20.656	7.455	0.793	21.697	0.039	0	99.449		48.4126	2.46197	35.9752	13.1503	100
	22779HD (average, n=25)	48.5143	0.00644	0.53584	0	20.5988	7.38024	0.81604	21.7324	0.03532	0.00056	99.6199		48.5308	2.53556	35.9047	13.0289	100	0	0.142528	99.8575	100
	%RSD	0.497333	189.971	26.4856	#DIV/0!	2.26984	6.48214	11.7183	0.681784	42.4981	277.983
	BF132_24516HD_Hd1-1	48.18	0	0.384	0	20.924	6.9	0.244	22.141	0.05	0	98.823		50.0165	0.766931	36.8943	12.3223	100	0	0.20398	99.796	100
	BF132_24516HD_Hd1-2	48.725	0	0.317	0	21.153	7.127	0.262	22.176	0.042	0	99.808		49.6267	0.815801	36.949	12.6086	100	0	0.169798	99.8302	100
	BF132_24516HD_Hd2-1	48.976	0	0.099	0	22.209	6.25	0.296	22.334	0.033	0.002	100.236		49.607	0.914784	38.5038	10.9745	100	0	0.132466	99.8675	100
	BF132_24516HD_Hd2-2	48.589	0	0.136	0	21.914	6.473	0.277	22.263	0.021	0	99.681		49.6161	0.858953	38.1205	11.4044	100	0	0.0846213	99.9154	100
	BF132_24516HD_Hd3-1	48.895	0	0.155	0	22.096	5.939	0.35	22.352	0.034	0.004	99.832		49.914	1.08749	38.514	10.4845	100	0	0.137208	99.8628	100
	BF132_24516HD_Hd3-2	48.786	0.022	0.134	0.036	22.338	5.772	0.373	22.379	0.051	0.002	99.893		49.8454	1.15596	38.8353	10.1634	100	0	0.205141	99.7949	100
	BF132_24516HD_Hd4-1	48.675	0.02	0.295	0	20.599	7.306	0.222	22.396	0.057	0.007	99.577		50.2613	0.693214	36.0835	12.962	100	0	0.230953	99.769	100
	BF132_24516HD_Hd4-2	48.647	0	0.295	0	21.22	6.787	0.267	22.286	0.059	0.006	99.577		49.9842	0.833225	37.1487	12.0339	100	0	0.238893	99.7611	100
	BF132_24516HD_Hd5-1	48.965	0	0.124	0	22.258	5.851	0.349	22.229	0	0.007	99.795		49.7143	1.08602	38.8549	10.3447	100	0	0	100	100
	BF132_24516HD_Hd5-2	48.712	0	0.152	0	22.242	5.732	0.357	22.187	0.023	0	99.405		49.7734	1.11434	38.9467	10.1656	100	0	0.0932846	99.9067	100
	BF132_24516HD_Hd6-1	48.872	0	0.176	0	20.718	6.559	0.556	22.501	0.043	0.003	99.428		50.4154	1.73335	36.2333	11.6179	100	0	0.174046	99.826	100
	BF132_24516HD_Hd6-2	48.864	0	0.238	0	21.505	6.037	0.603	22.628	0.014	0.001	99.89		50.2563	1.86343	37.2805	10.5997	100	0	0.0562364	99.9438	100
	BF132_24516HD_Hd7-1	48.821	0	0.216	0	21.4	6.104	0.578	22.474	0.019	0.001	99.613		50.1569	1.79485	37.2788	10.7694	100	0	0.0766761	99.9233	100
	BF132_24516HD_Hd7-2	48.579	0	0.196	0	21.519	5.952	0.533	22.4	0.057	0	99.236		50.1753	1.66119	37.6237	10.5398	100	0	0.230517	99.7695	100
	BF132_24516HD_Hd8-1	48.878	0	0.138	0	21.99	5.856	0.318	22.351	0.014	0.002	99.552		50.1288	0.992359	38.4959	10.3829	100	0	0.0567886	99.9432	100
	BF132_24516HD_Hd8-2	48.932	0	0.117	0	22.331	5.808	0.291	22.171	0.04	0	99.701		49.7133	0.907885	39.0835	10.2954	100	0	0.162044	99.838	100
	BF132_24516HD_Hd9-1	48.654	0	0.326	0	21.62	6.534	0.196	21.915	0.034	0	99.279		49.5494	0.616601	38.155	11.679	100	0	0.138919	99.8611	100
	BF132_24516HD_Hd9-2	48.538	0.006	0.306	0	21.932	6.416	0.156	22.048	0.064	0	99.466		49.5949	0.488252	38.5075	11.4093	100	0	0.259841	99.7402	100
	24516HD (average, n=18)	48.7382	0.00266667	0.211333	0.002	21.6649	6.30017	0.346	22.2906	0.0363889	0.00194444	99.5942		49.9084	1.0779	37.8622	11.1515	100	0	0.147221	99.8528	100
	%RSD	0.401843	255.958	41.7241	424.264	2.61665	7.75885	38.9379	0.76706	50.2244	127.779			1.21522	85.8317	3.2357	9.7174	100	1.34399	58.4637	40.1923	100
	BF132_37087HD_Hd1-1	50.222	0	0.521	0	21.106	1.282	4.458	22.501	0.145	0	100.284		48.7124	13.4285	35.665	2.19409	100	0	0.564852	99.4351	100
	BF132_37087HD_Hd1-2	50.111	0.073	0.536	0	21.079	1.202	4.477	22.512	0.126	0	100.156		48.7857	13.4995	35.6555	2.05926	100	0	0.491697	99.5083	100
	BF132_37087HD_Hd10-1	50.036	0.045	0.507	0	20.878	1.261	4.668	22.421	0.096	0	99.912		48.5207	14.0557	35.2662	2.15732	100	0	0.374544	99.6255	100
	BF132_37087HD_Hd10-2	50.272	0.006	0.5	0	20.652	1.222	4.632	22.577	0.119	0.004	99.984		48.9657	13.978	34.9612	2.0952	100	0	0.464877	99.5351	100
	BF132_37087HD_Hd2-1	50.17	0.065	0.352	0	21.04	1.199	4.414	22.711	0.075	0.014	100.04		49.1334	13.2869	35.5291	2.05063	100	0	0.292764	99.7072	100
	BF132_37087HD_Hd2-2	50.249	0.08	0.342	0.017	21.275	1.29	4.278	22.723	0.122	0.004	100.38		49.0764	12.8558	35.8653	2.20254	100	0	0.474559	99.5254	100
	BF132_37087HD_Hd3-1	50.639	0.023	0.197	0.014	20.421	1.179	4.792	23.04	0.085	0	100.39		49.4642	14.3145	34.2203	2.00101	100	0	0.329143	99.6709	100
	BF132_37087HD_Hd3-2	50.517	0	0.499	0	19.926	1.076	4.824	23.027	0.141	0	100.01		49.9037	14.5463	33.7065	1.84347	100	0	0.549932	99.4501	100
	BF132_37087HD_Hd4-1	49.506	0.039	0.905	0	20.228	1.143	4.522	22.524	0.163	0	99.03		49.4942	13.8258	34.6945	1.98556	100	0	0.643991	99.356	100
	BF132_37087HD_Hd4-2	49.988	0.168	0.949	0.041	20.724	1.146	4.759	22.56	0.19	0.002	100.591		48.764	14.3129	34.9649	1.95827	100	0.392227	0.34838	99.2594	100
	BF132_37087HD_Hd5-1	50.164	0.062	0.535	0.002	20.796	1.234	4.663	22.533	0.131	0	100.183		48.7423	14.0347	35.1128	2.11023	100	0	0.510183	99.4898	100
	BF132_37087HD_Hd5-2	50.349	0.068	0.486	0.01	20.46	1.261	4.749	22.612	0.099	0	100.119		48.9579	14.3066	34.5771	2.15838	100	0	0.386391	99.6136	100
	BF132_37087HD_Hd6-1	50.502	0.032	0.346	0	21.094	1.327	4.467	22.695	0.084	0.008	100.608		48.8861	13.3882	35.466	2.25972	100	0	0.326365	99.6736	100
	BF132_37087HD_Hd6-2	50.112	0.017	0.398	0	20.801	1.265	4.226	22.726	0.084	0	99.656		49.5744	12.8267	35.4174	2.18149	100	0	0.330495	99.6695	100
	BF132_37087HD_Hd7-1	50.015	0	0.646	0.023	20.922	1.25	4.391	22.964	0.125	0	100.361		49.4995	13.1695	35.201	2.13006	100	0.352007	0.134923	99.5131	100
	BF132_37087HD_Hd7-2	50.19	0.061	0.71	0	20.359	1.212	4.588	22.919	0.128	0	100.196		49.6598	13.832	34.4322	2.07606	100	0	0.499384	99.5006	100
	BF132_37087HD_Hd8-1	50.492	0.052	0.298	0	20.56	1.174	4.689	22.931	0.124	0.003	100.39		49.3869	14.0514	34.5629	1.99887	100	0	0.480956	99.519	100
	BF132_37087HD_Hd8-2	50.101	0.087	0.553	0	20.802	1.193	4.629	22.44	0.115	0	99.92		48.7182	13.9832	35.251	2.04756	100	0	0.449777	99.5502	100
	BF132_37087HD_Hd9-1	50.012	0.004	0.567	0	20.027	1.118	4.484	23.034	0.157	0	99.403		50.3048	13.6256	34.1393	1.93024	100	0	0.616656	99.3833	100
	BF132_37087HD_Hd9-2	50.46	0.032	0.516	0.009	20.219	1.175	4.808	23.06	0.093	0	100.419		49.6335	14.3989	33.9683	1.99932	100	0	0.360925	99.6391	100
	37087HD (average, n=20)	50.2053	0.0457	0.51815	0.0058	20.6684	1.21045	4.5759	22.7255	0.1201	0.00175	100.077		49.2086	13.7865	34.9328	2.07206	100	0	0.468404	99.5316	100
	%RSD	0.504264	88.862	35.6639	185.83	1.8511	5.18289	3.8151	0.981236	24.9527	204.672			8.29326	44.865	12.2118	34.6299	100	2.60139	78.6977	18.7009	100
	BF064_NRM-AG1_Cpx1-1	51.285	0.882	3.417	0.077	7.947	0.2	14.593	21.549	0.29	0	100.24		44.6938	42.1129	12.8653	0.327928	100
	BF064_NRM-AG1_Cpx1-2	50.99	0.911	3.524	0.056	7.803	0.188	14.75	21.566	0.36	0	100.182		44.6239	42.466	12.6025	0.307528	100
	BF064_NRM-AG1_Cpx1-3	50.886	1.185	3.757	0.128	8.223	0.19	14.577	21.671	0.331	0	100.948		44.6622	41.8004	13.2279	0.309559	100
	BF064_NRM-AG1_Cpx2-1	51.542	0.934	3.168	0.1	7.856	0.211	14.987	21.378	0.328	0.007	100.534		44.0514	42.9693	12.6355	0.343719	100
	BF064_NRM-AG1_Cpx2-2	50.686	1.022	3.878	0.008	8.061	0.224	14.22	21.417	0.414	0.009	99.949		44.926	41.504	13.1986	0.371463	100
	BF064_NRM-AG1_Cpx3-1	50.204	1.108	4.294	0.01	8.31	0.222	14.15	21.464	0.383	0.008	100.181		44.8905	41.1767	13.5657	0.36705	100
	BF064_NRM-AG1_Cpx3-2	49.716	1.416	4.515	0.072	8.317	0.188	14.137	21.494	0.325	0.006	100.188		44.9622	41.147	13.5799	0.310897	100
	BF064_NRM-AG1_Cpx3-3	50.987	1.044	3.934	0.082	8.002	0.18	14.264	21.596	0.349	0.007	100.445		45.1505	41.4937	13.0583	0.297502	100
	BF064_NRM-AG1_Cpx4-1	51.529	0.856	3.189	0.049	7.914	0.197	14.909	21.384	0.3	0.009	100.336		44.1259	42.806	12.7467	0.321365	100
	BF064_NRM-AG1_Cpx4-2	51.262	0.854	3.364	0.064	7.578	0.179	14.618	21.551	0.335	0	99.812		44.9476	42.4207	12.3365	0.295135	100
	BF064_NRM-AG1_Cpx5-1	50.519	1.306	4.218	0.095	8.08	0.22	14.335	21.57	0.302	0	100.645		44.9409	41.5566	13.1402	0.362362	100
	BF064_NRM-AG1_Cpx5-2	51.426	0.871	3.33	0	7.777	0.213	14.803	21.559	0.354	0	100.4		44.5484	42.5603	12.5434	0.347946	100
	BF064_NRM-AG1_Cpx5-3	51.45	0.89	3.312	0.013	8.083	0.227	14.617	21.568	0.345	0.009	100.514		44.5669	42.0254	13.0369	0.370814	100
	NRM-AG1 CPX (average, n=13)	50.9602	1.02146	3.68462	0.058	7.99623	0.203	14.5354	21.5205	0.339692	0.00423077	100.323		44.6976	42.0058	12.9633	0.333316	100
	%RSD	1.09144	18.0075	12.2068	69.4666	2.70329	8.53227	1.98628	0.406638	10.0712	98.4788			3.38145	22.9819	17.5463	56.0903	100	7.49822	57.2662	35.2356	100
	BF064_NRM-EN2_Opx1-1	57.916	0	1.048	0.75	7.261	0.191	32.947	0.48	0	0	100.692		0.920583	87.9202	10.8697	0.28959	100	0	0	100	100
	BF064_NRM-EN2_Opx1-2	57.779	0	1.071	0.55	7.211	0.188	33.161	0.316	0.001	0	100.39		0.604979	88.3347	10.7757	0.284537	100	0	0.00346439	99.9965	100
	BF064_NRM-EN2_Opx1-3	57.678	0.021	1.142	0.39	7.471	0.195	33.106	0.347	0.02	0	100.429		0.662262	87.914	11.1295	0.294214	100	0	0.0690271	99.931	100
	BF064_NRM-EN2_Opx1-4	57.958	0	1.04	0.461	7.294	0.151	32.673	0.526	0.008	0	100.127		1.01545	87.7631	10.991	0.23045	100	0	0.0279402	99.9721	100
	BF064_NRM-EN2_Opx1-5	57.835	0.014	1.097	0.767	7.343	0.161	33.044	0.278	0.025	0.01	100.634		0.533445	88.2243	10.9981	0.24423	100	0	0.0867355	99.9133	100
	BF064_NRM-EN2_Opx2-1	57.61	0	1.102	0.776	7.412	0.182	32.614	0.291	0.008	0	100.023		0.563961	87.945	11.2122	0.27884	100	0	0.0280488	99.972	100
	BF064_NRM-EN2_Opx2-2	57.511	0	1.158	0.797	7.43	0.157	32.859	0.307	0	0.004	100.298		0.590948	88.0067	11.1634	0.238912	100	0	0	100	100
	BF064_NRM-EN2_Opx2-3	57.788	0	1.169	0.851	7.291	0.172	33.201	0.277	0	0.001	100.815		0.52964	88.3289	10.8814	0.25999	100	0	0	100	100
	BF064_NRM-EN2_Opx2-4	58.158	0	1.086	0.471	7.352	0.2	32.866	0.242	0	0	100.454		0.466566	88.1649	11.0637	0.304829	100	0	0	100	100
	BF064_NRM-EN2_Opx2-5	58.525	0.01	0.352	0.131	7.513	0.193	33.249	0.223	0	0	100.229		0.424743	88.1152	11.1695	0.290607	100	0	0	100	100
	BF064_NRM-EN2_Opx2-6	58.106	0	1.136	0.887	7.332	0.173	32.96	0.352	0	0.003	100.976		0.675985	88.0709	10.9904	0.262645	100	0	0	100	100
	NRM-EN2 OPX (average, n=11)	57.8967	0.00409091	1.03645	0.621	7.35545	0.178455	32.9709	0.330818	0.00563636	0.00163636	100.401		0.635105	88.072	11.0221	0.270839	100	0	0.0195776	99.9804	100
	%RSD	0.49437	181.764	22.2878	38.2161	1.2561	9.37795	0.629192	28.4584	159.139	189.883			75.4304	2.32044	2.59872	19.6504	100	0.301926	88.3817	11.3163	100
	BF132_R1213_Hd1-1	48.374	0	0.428	0	20.735	8.161	0.258	21.331	0.101	0	99.416		48.1227	0.809859	36.5125	14.5549	100	0	0.410641	99.5894	100
	BF132_R1213_Hd1-2	48.169	0	0.529	0	21.257	7.367	0.232	21.322	0.034	0	98.91		48.3922	0.732633	37.6572	13.218	100	0	0.139447	99.8606	100
	BF132_R1213_Hd2-1	48.556	0.054	0.361	0	21.509	7.653	0.305	21.288	0.063	0	99.798		47.7832	0.952558	37.6842	13.58	100	0	0.255247	99.7448	100
	BF132_R1213_Hd2-2	48.518	0.015	0.583	0	21.459	7.506	0.288	21.34	0.067	0	99.795		48.0368	0.902034	37.704	13.3572	100	0	0.272182	99.7278	100
	BF132_R1213_Hd3-1	48.277	0.067	0.473	0	21.545	7.423	0.249	21.317	0.03	0.001	99.428		48.067	0.781215	37.9197	13.2321	100	0	0.122264	99.8777	100
	BF132_R1213_Hd3-2	49.289	0	0.501	0	21.774	7.722	0.248	21.681	0.041	0	101.256		48.0452	0.764668	37.6623	13.5278	100	0	0.164146	99.8359	100
	BF132_R1213_Hd4-1	48.552	0	0.436	0	21.017	8.12	0.252	21.259	0.084	0.008	99.728		47.8444	0.789114	36.9196	14.4468	100	0	0.340937	99.6591	100
	BF132_R1213_Hd4-2	48.575	0	0.493	0	21.539	7.501	0.257	21.344	0.057	0.002	99.768		48.0248	0.804589	37.8281	13.3425	100	0	0.231551	99.7684	100
	BF132_R1213_Hd5-1	48.209	0	0.549	0	21.518	7.504	0.308	21.269	0.067	0.002	99.459		47.8755	0.964647	37.8065	13.3533	100	0	0.272174	99.7278	100
	BF132_R1213_Hd5-2	48.605	0	0.337	0	21.197	8.043	0.273	21.36	0.031	0	99.85		47.8458	0.850855	37.0608	14.2426	100	0	0.125501	99.8745	100
	BF132_R1213_Hd6-1	48.662	0	0.446	0	21.283	7.408	0.279	21.327	0.046	0	99.452		48.2687	0.878599	37.5982	13.2545	100	0	0.188046	99.812	100
	BF132_R1213_Hd6-2	47.994	0	0.526	0	21.375	7.569	0.289	21.371	0.067	0	99.213		48.0885	0.904827	37.5423	13.4643	100	0	0.272081	99.7279	100
	BF132_R1213_Hd7-1	48.472	0	0.502	0	21.379	7.751	0.273	21.414	0.045	0	99.878		48.0041	0.851519	37.4082	13.7362	100	0	0.182218	99.8178	100
	BF132_R1213_Hd7-2	48.647	0.075	0.536	0	21.453	7.42	0.291	21.467	0.084	0	99.973		48.2591	0.910231	37.6439	13.1868	100	0	0.340561	99.6594	100
	BF132_R1213_Hd8-1	48.554	0	0.484	0	21.573	7.635	0.239	21.294	0.056	0	99.855		47.8505	0.747271	37.8389	13.5633	100	0	0.227205	99.7728	100
	BF132_R1213_Hd8-2	48.561	0.032	0.434	0	21.531	7.258	0.274	21.259	0.02	0.003	99.399		48.1147	0.862853	38.0363	12.9861	100	0	0.0818463	99.9182	100
	R1213 HD (average, n=16)	48.5009	0.0151875	0.476125	0	21.384	7.62756	0.269688	21.3527	0.0558125	0.001	99.6829		48.0385	0.844207	37.5513	13.566	100	0	0.226711	99.7733	100
	%RSD	0.587161	174.938	13.9806	#DIV/0!	1.15854	3.56896	8.49632	0.484852	40.1505	209.762
	Session-240429
	BF154_95AK24 (or UWC3CPX)_Cpx1	53.659	0.091	1.232	0.006	4.196	0.22	15.82	23.758	0.066	0.005	99.053		48.27	44.7224	6.65428	0.353361	100	0	0.242074	99.7579	100
	BF154_95AK24 (or UWC3CPX)_Cpx2	52.998	0.113	1.263	0	4.761	0.225	15.238	23.595	0.134	0.001	98.328		48.4585	43.5441	7.63214	0.365309	100	0	0.495549	99.5045	100
	BF154_95AK24 (or UWC3CPX)_Cpx3	53.73	0.085	1.237	0	4.31	0.222	15.728	24.031	0.13	0	99.473		48.5921	44.2505	6.80251	0.354875	100	0	0.473441	99.5266	100
	BF154_95AK24 (or UWC3CPX)_Cpx4	53.126	0.179	2.117	0	4.053	0.216	15.444	23.679	0.133	0	98.948		48.8206	44.3048	6.52251	0.352064	100	0	0.493777	99.5062	100
	BF154_95AK24 (or UWC3CPX)_Cpx5	53.481	0.12	1.325	0	4.807	0.226	15.272	23.51	0.114	0	98.861		48.2849	43.6421	7.70604	0.36694	100	0	0.421907	99.5781	100
	95AK24 (or UWC3CPX) CPX (average, n=5)	53.3988	0.1176	1.4348	0.0012	4.4254	0.2218	15.5004	23.7146	0.1154	0.0012	98.9312		48.4848	44.0945	7.06222	0.358492	100	0	0.425143	99.5749	100
	%RSD	0.606257	31.7235	26.7042	223.607	7.68682	1.81466	1.70124	0.841846	24.932	180.662			7.90954	22.2399	56.372	13.4785	100	12.0574	78.611	9.33161	100
	BF162_97SL65CPX_Cpx1	55.29	0.059	1.027	0.044	1.737	0.009	17.2	23.943	0.526	0.001	99.874		48.6271	48.6048	2.75358	0.0144501	100	0	1.89653	98.1035	100
	BF160_97SL65CPX_Cpx10	54.72	0.056	1.071	0.013	1.683	0.01	17.475	24.362	0.392	0	99.811		48.7257	48.631	2.62741	0.0158115	100	0.605136	0.80228	98.5926	100
	BF154_97SL65CPX_Cpx11	55.037	0.064	1.187	0.02	1.804	0	17.323	23.954	0.472	0	99.888		48.4259	48.7274	2.84665	0	100	0	1.69744	98.3026	100
	BF161_97SL65CPX_Cpx12	54.963	0.038	1.315	0.017	1.805	0	17.078	24.033	0.439	0	99.715		48.8434	48.2932	2.86335	0	100	0	1.5889	98.4111	100
	BF154_97SL65CPX_Cpx12	54.587	0.022	1.049	0.037	1.787	0.02	17.006	23.314	0.61	0.003	98.444		48.1826	48.902	2.88268	0.0326762	100	0	2.23047	97.7695	100
	BF154_97SL65CPX_Cpx14	54.671	0.008	0.927	0.044	1.639	0.002	17.296	23.945	0.446	0	99.019		48.5784	48.823	2.59541	0.00320764	100	0	1.61101	98.389	100
	BF161_97SL65CPX_Cpx15	55.373	0.01	0.871	0.007	1.62	0.003	17.187	24.022	0.474	0	99.613		48.8224	48.6028	2.56994	0.00482014	100	0	1.71345	98.2865	100
	BF162_97SL65CPX_Cpx2	55.052	0.055	0.852	0.015	1.684	0	17.378	23.846	0.522	0.002	99.427		48.3298	49.0061	2.66404	0	100	0	1.87855	98.1214	100
	BF160_97SL65CPX_Cpx3	54.965	0.06	1.224	0	1.815	0	17.039	24.338	0.562	0.002	100.025		49.2048	47.9311	2.86416	0	100	0.314062	1.70696	97.979	100
	BF162_97SL65CPX_Cpx3	54.974	0.077	1.148	0.008	1.794	0	17.519	24.036	0.392	0	99.978		48.2533	48.9356	2.81116	0	100	0	1.4041	98.5959	100
	BF154_97SL65CPX_Cpx3	54.691	0.042	0.952	0.053	1.634	0.03	17.419	23.967	0.404	0	99.213		48.4154	48.9603	2.57644	0.0479092	100	0	1.45537	98.5446	100
	BF161_97SL65CPX_Cpx6	55.307	0.034	1.282	0.041	1.911	0.009	17.111	23.707	0.735	0	100.168		48.3679	48.5743	3.04326	0.0145161	100	0.0589933	2.58454	97.3565	100
	BF154_97SL65CPX_Cpx6	54.463	0.107	1.183	0	1.862	0	17.208	23.687	0.366	0.003	98.915		48.2586	48.7804	2.96103	0	100	0	1.33141	98.6686	100
	BF154_97SL65CPX_Cpx8	54.876	0.01	1.174	0.041	1.767	0.014	17.053	23.544	0.719	0	99.236		48.3829	48.76	2.83431	0.0227441	100	0.0776059	2.52859	97.3938	100
	BF160_97SL65CPX_Cpx9	55.018	0.01	0.762	0.01	1.611	0.02	17.414	24.622	0.389	0.003	99.913		49.1211	48.3387	2.50864	0.031543	100	0.359888	1.03002	98.6101	100
	97SL65CPX (average, n=15)	54.9325	0.0434667	1.06827	0.0233333	1.74353	0.0078	17.2471	23.9547	0.496533	0.000933333	99.5181		48.5706	48.6575	2.75938	0.0125028	100	0	1.78929	98.2107	100
	%RSD	0.48972	66.1879	15.6369	77.1882	5.36745	121.549	0.982682	1.36633	23.5253	137.13			1.32637	1.3273	4.06699	93.2793	100	2.96299	27.1455	69.8916	100
	Session-240815
	BF174_MB04-8OPX_Opx1	50.09	0.046	0.953	0.004	30.551	0.835	15.658	0.681	0.038	0	98.856		1.44974	46.3798	50.7652	1.40526	100
	BF174_MB04-8OPX_Opx2	49.71	0.054	1.05	0.019	30.555	0.993	15.184	0.708	0	0	98.306		1.52358	45.4641	51.323	1.68931	100
	BF174_MB04-8OPX_Opx3	50.294	0.063	0.954	0	29.941	0.971	15.863	0.649	0.031	0	98.766		1.38502	47.1028	49.8741	1.63816	100	0	0.119575	99.8804	100
	BF174_MB04-8OPX_Opx22	50.038	0.077	1.181	0	30.195	0.993	15.138	0.734	0.007	0.003	98.378		1.59045	45.6397	51.0689	1.70098	100	0	0.0274404	99.9726	100
	BF174_MB04-8OPX_Opx23	49.931	0.058	0.88	0	30.636	0.965	14.979	0.766	0.017	0	98.245		1.65502	45.0307	51.666	1.64828	100	0	0.0664239	99.9336	100
	BF174_MB04-8OPX_Opx24	50.452	0.08	0.759	0	29.849	1.096	15.863	0.716	0	0.001	98.839		1.52494	47.0084	49.6213	1.84535	100	0	0	100	100
	BF174_MB04-8OPX_Opx25	50.357	0.041	0.915	0.008	30.738	0.884	15.411	0.623	0	0	98.977		1.33242	45.86	51.3129	1.49463	100	0	0	100	100
	BF174_MB04-8OPX_Opx7	50.183	0.029	1.002	0.016	30.407	0.874	15.629	0.671	0.038	0	98.852		1.43247	46.4243	50.6682	1.47504	100
	BF174_MB04-8OPX_Opx8	49.713	0.081	0.964	0.025	30.012	0.964	15.563	0.777	0	0	98.099		1.6667	46.4494	50.2492	1.63471	100
	BF174_MB04-8OPX_Opx9	49.785	0.029	0.785	0.015	30.612	1.018	15.029	0.668	0.024	0.001	97.983		1.44345	45.1861	51.6314	1.739	100	0	0.0937599	99.9062	100
	BF174_MB04-8OPX_Opx10	50.021	0.061	1.095	0	30.27	0.951	15.342	0.779	0.028	0.005	98.559		1.6751	45.9024	50.8058	1.61663	100	0	0.108837	99.8912	100
	BF174_MB04-8OPX_Opx11	50.326	0.044	0.882	0	30.297	1.091	15.773	0.647	0.01	0	99.079		1.37355	46.5914	50.204	1.83102	100
	BF174_MB04-8OPX_Opx31	49.817	0.053	0.993	0.01	30.84	0.932	14.983	0.785	0.028	0	98.462		1.69031	44.8897	51.8334	1.5865	100	0.0189095	0.0900972	99.891	100
	BF174_MB04-8OPX_Opx32	50.523	0.037	0.939	0.001	30.119	0.61	15.818	0.761	0.038	0	98.858		1.6274	47.0666	50.2747	1.03126	100	0	0.14684	99.8532	100
	BF174_MB04-8OPX_Opx14	50.431	0.07	0.777	0.003	30.117	1.096	15.904	0.636	0	0.002	99.043		1.3492	46.9437	49.869	1.83806	100
	BF174_MB04-8OPX_Opx35	50.099	0.046	1.174	0.012	30.423	0.839	15.545	0.762	0.035	0	98.935		1.62817	46.2153	50.7393	1.41721	100
	BF174_MB04-8OPX_Opx37	50.239	0.036	0.778	0	30.684	1.059	15.244	0.657	0	0	98.71		1.40821	45.4624	51.3349	1.79443	100	0	0	100	100
	MB04-8OPX (average, n=17)	50.1182	0.0532353	0.945941	0.00664706	30.3674	0.951235	15.4662	0.707059	0.0172941	0.000705882	98.6339		1.51463	46.0985	50.7759	1.6109	100	0	0.0669959	99.933	100
	%RSD	0.524991	31.8059	13.8125	121.866	0.978215	12.7447	2.12024	8.02044	91.6037	198.868			36.7752	13.5267	3.50098	46.1971	100	0.408717	88.3257	11.2656	100
	BF174_MB04-8CPX_Cpx1	50.609	0.228	2.346	0.032	13.302	0.481	10.843	20.836	0.35	0	99.041		44.6301	32.3157	22.2397	0.814492	100	1.19118	0.163267	98.6456	100
	BF174_MB04-8CPX_Cpx2	51.534	0.231	2.101	0	12.656	0.427	11.084	21.512	0.356	0	99.91		45.6242	32.7086	20.9512	0.71593	100	0.37317	0.979768	98.6471	100
	BF174_MB04-8CPX_Cpx3	50.551	0.255	2.384	0.041	13.201	0.457	10.916	21.103	0.38	0	99.299		44.9414	32.3457	21.9436	0.76939	100
	BF174_MB04-8CPX_Cpx4	51.177	0.242	2.359	0.047	13.662	0.42	11.38	20.849	0.371	0	100.507		43.7279	33.2098	22.3659	0.696387	100
	BF174_MB04-8CPX_Cpx5	50.99	0.277	2.637	0.018	13.501	0.463	11.289	20.771	0.417	0	100.388		43.8367	33.1503	22.2405	0.772484	100
	BF174_MB04-8CPX_Cpx6	51.671	0.189	2.274	0.022	12.84	0.414	11.457	21.659	0.466	0	101.01		45.1702	33.2457	20.9015	0.682562	100
	BF174_MB04-8CPX_Cpx7	50.705	0.27	2.637	0.035	13.32	0.463	11.381	20.261	0.413	0.01	99.501		43.2379	33.7936	22.1874	0.781111	100
	BF174_MB04-8CPX_Cpx8	50.745	0.252	2.281	0	13.464	0.496	11.243	20.7	0.46	0	99.644		43.8143	33.1115	22.2443	0.829956	100
	BF174_MB04-8CPX_Cpx9	50.897	0.216	2.274	0.022	12.557	0.485	11.008	21.708	0.424	0.001	99.599		45.9825	32.4439	20.7614	0.812163	100
	BF174_MB04-8CPX_Cpx10	50.961	0.337	2.689	0.056	15.228	0.464	11.173	18.597	0.407	0	99.921		40.0832	33.5073	25.6189	0.790615	100	0.145184	1.41974	98.4351	100
	BF174_MB04-8CPX_Cpx11	51.022	0.212	2.377	0.005	13.327	0.395	11.329	21.044	0.392	0.007	100.127		44.2829	33.1704	21.8896	0.657102	100
	BF174_MB04-8CPX_Cpx12	49.792	0.264	2.808	0.018	12.936	0.405	10.627	21.336	0.439	0	98.631		45.8447	31.7715	21.6958	0.687954	100
	BF174_MB04-8CPX_Cpx13	50.66	0.224	2.345	0	13.543	0.512	11.136	20.784	0.295	0.003	99.509		43.9833	32.7898	22.3703	0.856558	100
	BF174_MB04-8CPX_Cpx14	50.389	0.257	2.422	0.039	13.269	0.429	11.072	20.863	0.312	0.001	99.053		44.4227	32.8024	22.0528	0.722127	100
	BF174_MB04-8CPX_Cpx15	50.67	0.296	2.686	0.018	13.475	0.431	10.872	20.874	0.384	0.004	99.714		44.5456	32.2819	22.4453	0.727117	100
	BF174_MB04-8CPX_Cpx16	50.795	0.294	2.459	0.05	13.026	0.403	11.131	21.17	0.367	0	99.714		44.9053	32.852	21.5668	0.675788	100
	MB04-8CPX (average, n=16)	50.823	0.25275	2.44244	0.0251875	13.3317	0.446562	11.1213	20.8792	0.389563	0.001625	99.7133		44.3179	32.8452	22.0876	0.749334	100
	%RSD	0.862736	14.7363	7.93197	73.2822	4.49513	8.0379	2.04894	3.43429	12.3415	183.759			21.2674	17.6545	21.7279	39.3502	100	10.0325	53.8267	36.1408	100
	BF174_MB05-2OPX_Opx19	50.398	0.06	1.342	0.071	28.421	0.558	16.773	0.693	0.064	0	98.454		1.48534	50.0213	47.5479	0.945487	100	0	0.24762	99.7524	100
	BF174_MB05-2OPX_Opx2	50.406	0.08	1.313	0.031	28.874	0.603	16.279	0.486	0	0.001	98.08		1.05307	49.0795	48.8345	1.03292	100	0	0	100	100
	BF174_MB05-2OPX_Opx20	51.153	0.086	1.017	0.045	28.561	0.592	16.998	0.682	0	0	99.139		1.44816	50.2206	47.3375	0.993763	100	0	0	100	100
	BF174_MB05-2OPX_Opx4	50.759	0.062	1.156	0	28.884	0.583	17.128	0.612	0.007	0.007	99.198		1.28978	50.2251	47.5138	0.971316	100
	BF174_MB05-2OPX_Opx5	50.847	0.077	1.032	0.035	28.849	0.578	16.969	0.665	0.014	0	99.081		1.40739	49.969	47.6566	0.967051	100	0	0.0535893	99.9464	100
	BF174_MB05-2OPX_Opx6	50.195	0.046	1.372	0.056	28.657	0.6	17.038	0.611	0.03	0	98.639		1.29559	50.2684	47.4302	1.00579	100
	BF174_MB05-2OPX_Opx7	50.575	0.055	1.05	0.048	28.593	0.66	17.159	0.539	0	0	98.679		1.14065	50.5249	47.2303	1.10417	100
	BF174_MB05-2OPX_Opx10	50.451	0.119	1.363	0.045	28.855	0.598	16.968	0.622	0.007	0	99.028		1.31705	49.9913	47.6906	1.00102	100
	BF174_MB05-2OPX_Opx11	50.204	0.089	1.426	0.06	27.78	0.557	17.216	0.617	0	0	97.954		1.32134	51.2993	46.4364	0.942999	100	0	0	100	100
	BF174_MB05-2OPX_Opx12	50.916	0.078	1.188	0.028	29.14	0.599	17.02	0.51	0	0	99.509		1.07572	49.9504	47.9751	0.99881	100	0	0	100	100
	BF174_MB05-2OPX_Opx13	50.793	0.066	1.032	0.008	28.295	0.526	16.87	0.646	0.01	0	98.257		1.38566	50.3491	47.3733	0.891948	100	0	0.0388013	99.9612	100
	BF174_MB05-2OPX_Opx14	50.019	0.104	1.464	0.047	28.623	0.578	16.958	0.552	0.017	0	98.377		1.17582	50.2607	47.5901	0.973328	100
	BF174_MB05-2OPX_Opx15	50.576	0.089	1.165	0.04	28.859	0.603	17.162	0.606	0.01	0	99.131		1.27612	50.285	47.435	1.00384	100
	BF174_MB05-2OPX_Cpx16	50.926	0.367	2.646	0.061	11.314	0.202	11.682	21.966	0.44	0	99.615		46.5272	34.429	18.7056	0.338248	100					outlier; rejected
	BF174_MB05-2OPX_Opx16-2	50.291	0.066	1.286	0.054	28.617	0.6	17.057	0.472	0.041	0	98.53		1.00391	50.4784	47.5088	1.00886	100
	BF174_MB05-2OPX_Opx17	50.792	0.052	1.065	0.059	28.374	0.6	17.473	0.527	0	0	98.942		1.1104	51.2256	46.6646	0.99942	100
	BF174_MB05-2OPX_Opx35	50.629	0.088	1.05	0.053	28.707	0.539	16.964	0.591	0.014	0.002	98.65		1.2567	50.1908	47.6465	0.906069	100	0	0.0538428	99.9462	100
	BF174_MB05-2OPX_Opx30	50.62	0.152	1.255	0.029	28.398	0.609	17.248	0.57	0	0	98.898		1.20721	50.8275	46.9456	1.01966	100	0	0	100	100
	BF174_MB05-2OPX_Opx28	50.342	0.095	1.255	0	28.364	0.549	16.87	0.63	0.013	0.001	98.122		1.34972	50.2886	47.4318	0.929832	100	0	0.0503753	99.9496	100
	MB05-2OPX (average, n=18 out of 19)	50.5537	0.0813333	1.21283	0.0393889	28.6028	0.585111	17.0083	0.590611	0.0126111	0.000611111	98.6873		1.25544	50.3043	47.457	0.983239	100	0	0.0484869	99.9515	100
	%RSD	0.577896	31.8809	12.2753	51.8628	1.07372	5.31575	1.43583	11.0125	135.476	275.759			89.2111	3.23124	3.49876	4.05893	100	1.36413	61.0112	37.6247	100
	BF174_MB05-2CPX_Cpx1	51.177	0.441	2.732	0.044	11.666	0.248	11.931	21.83	0.423	0.001	100.52		45.7339	34.7786	19.0768	0.410737	100
	BF174_MB05-2CPX_Cpx2	49.852	0.316	2.234	0.132	11.082	0.254	11.767	21.611	0.404	0	97.657		46.1435	34.9584	18.4694	0.428743	100
	BF174_MB05-2CPX_Cpx3	50.929	0.346	2.545	0.055	12.068	0.243	11.816	20.885	0.442	0	99.342		44.4954	35.0269	20.0685	0.409275	100	1.61777	0.0848692	98.2974	100
	BF174_MB05-2CPX_Cpx4	50.829	0.33	2.725	0.036	11.378	0.216	11.88	21.772	0.366	0	99.572		45.9775	34.9071	18.7548	0.360603	100
	BF174_MB05-2CPX_Cpx5	51.099	0.298	2.455	0.058	11.331	0.262	12.131	21.999	0.475	0	100.123		45.8986	35.2164	18.4529	0.432142	100
	BF174_MB05-2CPX_Cpx6	51.839	0.26	2.095	0.05	10.962	0.266	11.961	22.295	0.47	0	100.198		46.736	34.8869	17.9363	0.440812	100	1.75832	0.0241655	98.2175	100
	BF174_MB05-2CPX_Cpx7	50.972	0.38	2.603	0.051	11.307	0.227	11.816	21.905	0.453	0	99.718		46.2611	34.7211	18.6388	0.378989	100
	BF174_MB05-2CPX_Cpx8	51.063	0.4	2.823	0.031	10.995	0.261	11.614	21.767	0.519	0	99.473		46.5952	34.592	18.3711	0.441684	100	1.39006	0.608191	98.0018	100
	BF174_MB05-2CPX_Cpx9	51.319	0.343	2.47	0.084	11.289	0.236	12.007	21.914	0.454	0	100.133		46.0198	35.0839	18.5045	0.391799	100
	BF174_MB05-2CPX_Cpx10	51.285	0.343	2.272	0.053	11.314	0.243	12.077	22.065	0.474	0.002	100.139		46.0723	35.087	18.4396	0.401117	100
	BF174_MB05-2CPX_Cpx11	50.793	0.379	2.544	0.081	11.831	0.272	11.903	21.477	0.441	0.003	99.737		45.2257	34.8754	19.4461	0.452803	100
	BF174_MB05-2CPX_Cpx12	50.818	0.418	2.709	0.078	12.538	0.275	11.708	20.597	0.419	0	99.56		43.9249	34.7409	20.8705	0.463626	100	1.45572	0.158714	98.3856	100
	BF174_MB05-2CPX_Cpx13	50.733	0.117	1.063	0.001	28.2	0.588	17.136	0.72	0	0	98.582		1.53064	50.6874	46.7937	0.988201	100	0	0	100	100	outlier; rejected
	BF174_MB05-2CPX_Cpx15	50.818	0.368	2.713	0.034	11.248	0.232	11.51	21.98	0.507	0	99.413		46.8078	34.1049	18.6967	0.390577	100
	BF174_MB05-2CPX_Cpx16	51.146	0.326	2.491	0.087	11.246	0.244	11.841	21.753	0.505	0.002	99.642		46.0874	34.9062	18.5977	0.408678	100
	BF174_MB05-2CPX_Cpx35	51.052	0.386	2.54	0.096	11.563	0.25	11.799	21.93	0.516	0	100.172		46.1003	34.5113	18.9729	0.415464	100
	BF174_MB05-2CPX_Cpx20	51.769	0.255	2.042	0.06	11.444	0.247	12.402	21.216	0.44	0.006	99.885		44.5715	36.2524	18.7659	0.410222	100	1.48753	0.182187	98.3303	100
	BF174_MB05-2CPX_Cpx22	51.133	0.435	2.625	0.091	12.453	0.234	12.127	20.706	0.513	0	100.317		43.6057	35.5346	20.4701	0.389575	100
	MB05-2CPX (average, n=17 out of 18)	51.0525	0.341167	2.42672	0.0623333	12.4397	0.266556	12.1903	20.4679	0.4345	0.000777778	99.6825		43.2268	35.8217	20.5064	0.445037	100
	%RSD	0.833294	22.5872	16.7162	48.445	31.8256	30.6626	10.265	24.1923	26.7857	204.746			27.6305	16.3125	28.3717	27.6853	100	22.3418	21.2532	56.405	100
	BF174_97SL65CPX_Cpx2	55.026	0.014	1.244	0.036	1.674	0.018	17.228	25.024	0.613	0	100.906		49.7338	47.641	2.59686	0.0282811	100
	BF174_97SL65CPX_Cpx4	55.121	0.04	1.085	0	1.59	0	17.317	24.962	0.597	0.008	100.749		49.6283	47.9042	2.46744	0	100	1.9903	0.154287	97.8554	100
	BF174_97SL65CPX_Cpx5	55.604	0.029	1.214	0.053	1.638	0.003	17.082	25.116	0.697	0	101.475		50.067	47.3796	2.54867	0.00472771	100	1.5186	0.971315	97.5101	100
	BF174_97SL65CPX_Cpx17	55.068	0.008	1.036	0.017	1.492	0.012	17.231	24.632	0.698	0	100.22		49.4805	48.161	2.33938	0.0190565	100	1.80371	0.71548	97.4808	100
	BF174_97SL65CPX_Cpx32	54.931	0.005	1.13	0.014	1.63	0	17.372	24.839	0.607	0	100.578		49.3988	48.071	2.53028	0	100
	97SL65CPX (average, n=5)	55.15	0.0192	1.1418	0.024	1.6048	0.0066	17.246	24.9146	0.6424	0.0016	100.751		49.6619	47.8309	2.49683	0.0104002	100	2.00673	0.30344	97.6898	100
	%RSD	0.477176	77.3749	7.6121	86.1503	4.34729	121.967	0.637579	0.751849	7.88046	223.607			0.741079	0.874417	3.34465	95.0399	100	3.02105	9.67537	87.3036	100
	Session-241010
	BF182_97SL65CPX_Di1	55.608	0.049	1.156	0.017	1.761	0.006	17.209	24.502	0.562	0	100.896		49.1753	48.0565	2.75869	0.00951973	100	0	2.0003	97.9997	100
	BF196_97SL65CPX_Di1.1	54.742	0.026	1.212	0.037	1.815	0	16.356	24.561	0.527	0.001	99.314		50.3967	46.6964	2.9069	0	100	0	1.91928	98.0807	100
	BF196_97SL65CPX_Di2.1	55.166	0	0.968	0.022	1.592	0.015	16.795	24.659	0.648	0	99.89		50.0365	47.4179	2.52147	0.024062	100	0.274942	2.05559	97.6695	100
	BF182_97SL65CPX_Di3	55.387	0.049	1.198	0.019	1.779	0.01	17.369	24.558	0.544	0.003	100.94		48.9968	48.217	2.77044	0.0157726	100	0.725475	1.21476	98.0598	100
	BF181_97SL65CPX_Di3	54.68	0.03	1.099	0.034	1.711	0.013	17.13	24.21	0.646	0	99.556		49.0176	48.2576	2.70399	0.0208079	100	1.34718	0.996137	97.6567	100
	BF182_97SL65CPX_Di4	54.807	0.081	1.32	0.004	1.873	0.009	17.1	24.667	0.423	0	100.321		49.4042	47.6535	2.92808	0.0142501	100	0.493986	1.02345	98.4826	100
	BF181_97SL65CPX_Di5	55.09	0.032	1.085	0.047	1.77	0.013	17.255	24.679	0.411	0	100.423		49.2798	47.941	2.75875	0.0205217	100	0.249423	1.21765	98.5329	100
	BF181_97SL65CPX_Di6	54.506	0.05	1.287	0.021	1.936	0.009	16.807	24.617	0.493	0.003	99.75		49.7108	47.2233	3.05154	0.0143677	100	0.807609	0.976372	98.216	100
	97SL65CPX (average, n=8)	54.9982	0.039625	1.16562	0.025125	1.77962	0.009375	17.0026	24.5566	0.53175	0.000875	100.109		49.4988	47.6863	2.79997	0.0149391	100	0.351138	1.55828	98.0906	100
	%RSD	0.689053	59.5825	9.82724	53.7129	5.80769	50.6566	1.94523	0.624142	16.7548	154.995			1.30273	5.64926	9.46176	83.5862	100	6.15108	34.9901	58.8588	100
	BF181_K3-20-10SPD_Px10	66.036	0	28.483	0	0.005	0.037	0.003	0.011	0.128	0.004	94.711		22.7615	8.63735	8.07564	60.5255	100	0	82.7378	17.2622	100	no Li2O data
	BF181_K3-20-10SPD_Px11	65.574	0	28.366	0	0.158	0.034	0.004	0.002	0.159	0.001	94.302		1.26766	3.52765	78.1681	17.0365	100	0	64.5859	35.4141	100	no Li2O data
	BF181_K3-20-10SPD_Px12	65.689	0	28.428	0	0.032	0.034	0.003	0.008	0.061	0.002	94.263		12.4941	6.51909	39.0088	41.978	100	0	63.2891	36.7109	100	no Li2O data
	BF181_K3-20-10SPD_Px13	66.487	0	28.501	0.001	0.147	0.037	0	0	0.089	0	95.262		0	0	79.686	20.314	100	0	52.7973	47.2027	100	no Li2O data
	BF181_K3-20-10SPD_Px14	67.929	0.009	29.481	0	0.057	0.051	0.005	0	0.178	0.007	97.717		0	7.58122	48.4832	43.9356	100	0	77.8279	22.1721	100	no Li2O data
	BF181_K3-20-10SPD_Px16	65.437	0.005	28.176	0	0.025	0.06	0	0	0.114	0	93.825		0	0	29.1481	70.8519	100	0	75.4994	24.5006	100	no Li2O data
	BF181_K3-20-10SPD_Px18	65.501	0	28.3	0	0.046	0.039	0	0	0.053	0.022	93.965		0	0	53.8013	46.1987	100	0	58.9685	41.0315	100	no Li2O data
	BF181_K3-20-10SPD_Px19	67.551	0.003	29.185	0	0.035	0.115	0	0.01	0.082	0.005	96.99		7.79836	0	21.3044	70.8972	100	0	53.6435	46.3565	100	no Li2O data
	BF181_K3-20-10SPD_Px21	65.973	0	28.414	0.004	0.021	0.011	0	0	0.125	0.001	94.562		0	0	65.3372	34.6628	100	0	90.0166	9.98344	100	no Li2O data
	BF181_K3-20-10SPD_Px22	67.112	0	29.097	0	0.102	0.026	0	0.005	0.089	0	96.446		4.75421	0	75.7019	19.5438	100	0	60.4961	39.5039	100	no Li2O data
	BF181_K3-20-10SPD_Px24	65.654	0	28.588	0	0.012	0.084	0.002	0.004	0.098	0.001	94.447		4.84523	3.37082	11.3458	80.4382	100	0	68.2356	31.7644	100	no Li2O data
	BF181_K3-20-10SPD_Px26	65.32	0	28.396	0	0.055	0.017	0	0.006	0.063	0.005	93.866		9.62011	0	68.8319	21.548	100	0	64.6384	35.3616	100	no Li2O data
	BF181_K3-20-10SPD_Px28	65.994	0	28.313	0	0.011	0.004	0	0.004	0.088	0	94.416		25.3997	0	54.5206	20.0797	100	0	91.0008	8.9992	100	no Li2O data
	BF181_K3-20-10SPD_Px29	65.768	0	28.58	0	0.02	0.026	0.028	0.009	0.066	0.007	94.517		10.6985	46.3114	18.557	24.4332	100	0	58.6734	41.3266	100	no Li2O data
	BF181_K3-20-10SPD_Px30	65.872	0	28.347	0	0.02	0.025	0	0.001	0.108	0.004	94.397		2.74917	0	42.9171	54.3338	100	0	84.3087	15.6913	100	no Li2O data
	BF181_K3-20-10SPD_Px31	66.056	0	28.642	0	0.019	0.017	0.012	0	0.121	0.001	94.87		0	37.1316	32.981	29.8874	100	0	82.9628	17.0372	100	no Li2O data
	BF181_K3-20-10SPD_Px32	65.734	0	28.534	0.001	0.056	0.051	0	0.014	0.084	0.001	94.475		14.2816	0	44.5896	41.1288	100	0	60.7944	39.2056	100	no Li2O data
	BF181_K3-20-10SPD_Px33	65.823	0	28.396	0	0.23	0.071	0.005	0.01	0.101	0.004	94.64		3.95865	2.75403	71.0679	22.2195	100	0	41.9796	58.0204	100	no Li2O data
	BF181_K3-20-10SPD_Px37	65.668	0	28.238	0.007	0.017	0.021	0	0	0.1	0.006	94.057		0	0	44.4223	55.5777	100	0	85.8321	14.1679	100	no Li2O data
	BF181_K3-20-10SPD_Px40	65.873	0	28.572	0	0.038	0.033	0	0.009	0.123	0	94.65		13.8999	0	45.8089	40.2912	100	0	77.4656	22.5344	100	no Li2O data
	K3-20-10SPD (average, n=20)	66.0525	0.00085	28.5518	0.00065	0.0553	0.03965	0.0031	0.00465	0.1015	0.00355	94.8136		5.57068	5.16735	51.7105	37.5514	100	0	68.7544	31.2456	100	no Li2O data
	%RSD	1.05778	270.642	1.1642	270.068	107.175	67.1641	212.409	99.7224	31.4695	140.541			18.7442	55.5516	15.724	9.98019	100
	S3407_06JY31CPX_cpx1	52.877	0.299	4.662	1.204	2.941	0.077	16.564	20.412	1.136	0.007	100.226		44.5526	50.3041	5.01049	0.132864	100	0.802969	3.52581	95.6712	100
	S3407_06JY31CPX_cpx2	52.455	0.34	4.675	1.258	2.942	0.084	16.415	20.435	0.965	0.002	99.626		44.7767	50.046	5.03175	0.145507	100	0	3.68541	96.3146	100
	S3407_06JY31CPX_cpx3	52.414	0.331	4.863	1.049	3.25	0.087	16.766	19.635	1.077	0.007	99.536		43.0888	51.1934	5.56692	0.150932	100	0.700676	3.42963	95.8697	100
	06JY31CPX (average, n=3)	52.582	0.323333	4.73333	1.17033	3.04433	0.0826667	16.5817	20.1607	1.05933	0.00533333	99.743		44.1404	50.5139	5.20262	0.143084	100	0.457053	3.58943	95.9535	100
	%RSD	0.487427	6.66445	2.37639	9.27011	5.85065	6.20758	1.06241	2.25878	8.19932	54.1266			17.0976	11.1893	34.5671	37.1459	100	19.4476	43.7397	36.8127	100
	S3407_06JY29CPX_cpx1	53.13	0.204	4.485	1.109	2.629	0.075	16.686	20.45	1.28	0	100.108		44.6719	50.7159	4.4826	0.129518	100	1.43205	3.45311	95.1148	100
	S3407_06JY29CPX_cpx2	52.248	0.207	5.013	1.302	2.718	0.081	16.419	20.098	1.394	0.001	99.516		44.5347	50.6224	4.70103	0.141892	100	2.72887	2.70949	94.5616	100
	S3407_06JY29CPX_cpx3	53.288	0.19	4.774	1.127	2.562	0.071	16.675	20.327	1.335	0.002	100.414		44.592	50.8979	4.38693	0.123132	100	1.16216	3.92933	94.9085	100
	06JY29CPX (average, n=3)	52.8887	0.200333	4.75733	1.17933	2.63633	0.0756667	16.5933	20.2917	1.33633	0.001	99.96		44.5998	50.7458	4.52287	0.131477	100	1.76725	3.36888	94.8639	100
	%RSD	1.05964	4.52934	5.55762	9.04011	2.96845	6.65184	0.91047	0.880363	4.26628	100			9.05463	13.0294	23.8307	54.0852	100	15.3179	35.722	48.9601	100
	S3407_06JY34OPX_opx1	56.156	0.063	2.896	0.555	5.526	0.121	34.853	0.717	0.217	0.004	101.205		1.33718	90.4403	8.04415	0.178396	100
	S3407_06JY34OPX_opx2	55.888	0.071	2.941	0.543	5.494	0.117	34.242	0.708	0.113	0	100.201		1.34261	90.3499	8.13213	0.175401	100
	S3407_06JY34OPX_opx3	56.131	0.08	2.946	0.545	5.564	0.119	34.508	0.669	0.123	0	100.779		1.2594	90.3878	8.17569	0.177098	100
	S3407_06JY31OPX_opx1
	06JY34OPX (average, n=3)	56.0583	0.0713333	2.92767	0.547667	5.528	0.119	34.5343	0.698	0.151	0.00133333	100.637		1.31307	90.3929	8.11706	0.176973	100
	%RSD	0.264085	11.9228	0.940608	1.17391	0.633915	1.68067	0.887088	3.6554	37.9973	173.205			54.4514	18.3862	7.37061	19.7918	100	0.659915	91.0467	8.29341	100
	S3407_06JY31OPX_opx1	55.225	0.111	3.323	0.486	6.344	0.12	33.852	0.852	0.042	0	100.475		1.60754	88.8705	9.34295	0.178991	100
	S3407_06JY31OPX_opx2	55.018	0.077	3.566	0.525	6.248	0.127	33.622	0.854	0.085	0	100.227		1.62318	88.9167	9.26932	0.190827	100
	S3407_06JY31OPX_opx3-1	55.295	0.044	3.328	0.529	6.262	0.131	33.414	0.911	0.049	0.003	100.08		1.73873	88.7348	9.32881	0.197658	100
	S3407_06JY31OPX_opx3-2	55.236	0.094	3.339	0.564	6.29	0.115	33.677	0.808	0.112	0.002	100.333		1.53418	88.9711	9.3221	0.17262	100
	06JY31OPX (average, n=4)	55.1935	0.0815	3.389	0.526	6.286	0.12325	33.6412	0.85625	0.072	0.00125	100.17		1.62573	88.8734	9.31583	0.184997	100
	%RSD	0.219174	35.0857	3.48743	6.0658	0.674935	5.78953	0.53645	4.93134	45.3467	120			45.739	6.92313	4.88632	42.4515	100	0.570672	88.321	11.1083	100
	PDD_97SL54CPX_scpx2c	56.174	0.025	7.401	0	2.25	0.02	11.807	17.67	4.435	0.01	99.93		49.2609	45.799	4.89606	0.0440782	100	0	18.2835	81.7165	100	Fu et al. (2003)31
	PDD_97SL54CPX_cpx2r	56.253	0.054	6.67	0.011	2.45	0.013	12.206	18.391	3.813	0.004	100		49.3096	45.5355	5.12732	0.0275548	100	0	15.6121	84.3879	100	Fu et al. (2003)31
	PDD_97SL54CPX_am2cpr	53.975	0.02	0.334	0.019	6.895	0.287	13.148	24.692	0.132	0.004	99.54		50.812	37.6461	11.075	0.466896	100	0	0.489152	99.5108	100	Fu et al. (2003)31
	PDD_97SL54CPX_cp2gt	55.704	0.025	6.988	0.08	2.684	0.006	12.167	18.445	4.009	0.008	100.32		49.221	45.1758	5.59052	0.0126576	100	0	16.2196	83.7804	100	Fu et al. (2003)31
	PDD_97SL54CPX_cpx3c	56.118	0.015	6.925	0	2.235	0.02	12.142	18.22	4.164	0	99.99		49.4106	45.8156	4.73094	0.0428776	100	0	16.9676	83.0324	100	Fu et al. (2003)31
	PDD_97SL54CPX_cpx3r	56.348	0.045	7.159	0.005	2.301	0	11.987	18.032	4.216	0.005	100.15		49.3937	45.6866	4.91974	0	100	0	17.2861	82.7139	100	Fu et al. (2003)31
	PDD_97SL54CPX_am3rcp	54.078	0.004	0.214	0	7.543	0.337	13.171	24.784	0.087	0	100.28		50.3084	37.1996	11.9512	0.540788	100	0	0.31856	99.6814	100	Fu et al. (2003)31
	PDD_97SL54CPX_cpx4	56.209	0.036	6.449	0	2.468	0.025	12.373	18.571	3.94	0	100.29		49.217	45.6253	5.10532	0.0523779	100	0	15.8927	84.1073	100	Fu et al. (2003)31
	PDD_97SL54CPX_cpx4c	56.244	0.043	6.38	0	2.416	0	12.29	18.789	3.762	0.003	100.15		49.7392	45.2687	4.99218	0	100	0	15.27	84.73	100	Fu et al. (2003)31
	PDD_97SL54CPX_cpx4r	55.927	0.047	6.527	0.015	2.655	0.023	12.185	18.724	3.834	0	100.13		49.5754	44.8895	5.48695	0.048142	100	0	15.5191	84.4809	100	Fu et al. (2003)31
	PDD_97SL54CPX_am4rcp	53.629	0.033	0.556	0	9.286	0.367	11.957	24.157	0.168	0	100.24		49.9812	34.422	14.9965	0.600285	100	0	0.625084	99.3749	100	Fu et al. (2003)31
	PDD_97SL54CPX_cpx1a	56.468	0.029	7.976	0.041	1.951	0.035	11.602	17.176	4.942	0	100.45		49.258	46.2954	4.36727	0.0793506	100	0.0716219	20.3553	79.5731	100	Fu et al. (2003)31
	PDD_97SL54CPX_cpx1b	56.093	0.015	7.314	0.011	2.225	0.02	11.896	18.042	4.34	0.006	100.11		49.6388	45.5395	4.77821	0.0435005	100	0	17.7686	82.2314	100	Fu et al. (2003)31
	PDD_97SL54CPX_cpx2c	56.174	0.025	7.401	0	2.25	0.015	11.807	17.67	4.435	0.01	99.94		49.2663	45.804	4.8966	0.0330623	100	0	18.2851	81.7149	100	Fu et al. (2003)31
	97SL54CPX (average, n=14)	55.671	0.0297143	5.59243	0.013	3.5435	0.0834286	12.1956	19.5259	3.3055	0.00357143	99.9636		49.6507	43.1486	7.03306	0.167709	100	0	13.2023	86.7977	100
	%RSD	1.76732	47.6382	51.2277	172.903	68.339	161.906	3.76949	14.125	52.9221	106.317			7.03763	2.61321	26.5771	63.7721	100	21.9393	17.4503	60.6104	100
	Session-251110
	BF064_97M44_1@1	48.772	0.331	6.321	0.188	19.618	0.12	22.156	0.043	0.016	0.002	97.61		0.0929159	66.6138	33.0883	0.204989	100
	BF064_97M44_1@2	48.541	0.102	5.91	0.188	19.371	0.114	22.093	0.05	0.015	0	96.407		0.108695	66.8261	32.8693	0.195918	100
	BF064_97M44_2@1	49.29	0.066	5.291	0.169	18.892	0.112	22.477	0.044	0.003	0	96.388		0.095335	67.7624	31.9504	0.191843	100
	BF064_97M44_4@1	48.556	0.093	6.28	0.2	19.364	0.102	21.52	0.038	0	0	96.2		0.0841155	66.2805	33.4569	0.178493	100	0	0	100	100
	BF064_97M44_5@1	48.737	0.103	6.388	0.191	19.396	0.115	22.161	0.049	0	0	97.155		0.106258	66.8662	32.8304	0.197148	100
	BF106_97M44_1@1	49.56	0.049	5.449	0.249	20.998	0.188	21.425	0.037	0	0.009	97.997		0.0797651	64.2663	35.3336	0.320403	100
	BF106_97M44_1@3	49.498	0.162	6.037	0.17	19.842	0.12	22.125	0.034	0.015	0	98.025		0.0732741	66.3446	33.3776	0.204447	100
	BF106_97M44_13@1	49.428	0.063	6.009	0.212	19.073	0.118	22.345	0.048	0	0.001	97.322		0.104078	67.4136	32.28	0.202268	100	0	0	100	100
	BF106_97M44_14@1	49.997	0.1	5.326	0.173	19.174	0.131	22.716	0.049	0.042	0	97.732		0.104867	67.6436	32.0299	0.221638	100
	BF106_97M44_15@1	50.092	0.257	5.246	0.145	19.309	0.124	22.74	0.038	0.03	0	98.004		0.0811135	67.5384	32.1712	0.209247	100	0.0490661	0.0667396	99.8842	100
	BF106_97M44_16@1	49.674	0.042	5.237	0.244	21.135	0.17	21.533	0.049	0	0.003	98.105		0.105057	64.2371	35.3697	0.288143	100
	BF106_97M44_7@1	49.625	0.091	5.343	0.226	20.212	0.143	22.228	0.051	0.046	0.03	98.008		0.108815	65.9889	33.661	0.241204	100
	BF117_97SL65-cpx_1@1 --> 97M44OPX	50.023	0.006	4.587	0.202	20.775	0.159	21.302	0.044	0.013	0	97.125		0.0956001	64.3987	35.2326	0.273106	100	0	0.0510877	99.9489	100
	BF117_97SL65-cpx_2@1 --> 97M44OPX	49.934	0.037	5.156	0.178	19.49	0.123	22.52	0.039	0.012	0.003	97.532		0.0835416	67.1209	32.5873	0.208291	100
	BF117_97SL65-cpx_3@1 --> 97M44OPX	49.589	0.044	5.512	0.189	20.277	0.149	21.726	0.032	0.028	0	97.565		0.0692545	65.4227	34.2531	0.254925	100	0	0.109539	99.8905	100
	BF117_97SL65-cpx_4@1 --> 97M44OPX	49.943	0.025	5.361	0.129	20.174	0.139	22.293	0.044	0.028	0	98.162		0.0937786	66.1105	33.5615	0.234204	100
	BF117_97SL65-cpx_7@1 --> 97M44OPX	49.776	0.115	6.235	0.225	19.476	0.127	22.503	0.029	0	0	98.522		0.0621759	67.1298	32.5928	0.215256	100
	BF238_97M44-OPX_1@1	38.593	0.005	22.873	0.104	22.26	0.344	11.486	2.615	0	0	98.28		7.21509	44.0951	47.9395	0.750338	100					Garnet? Rejected
	BF238_97M44-OPX_2@1	49.467	0.123	5.799	0.139	18.895	0.116	22.855	0.042	0	0.091	97.555		0.0899695	68.1206	31.593	0.196441	100
	BF238_97M44-OPX_3@1	49.966	0.113	5.87	0.203	19.523	0.12	22.328	0.037	0	0.01	98.17		0.0796769	66.9008	32.8152	0.204287	100	0	0	100	100
	BF270_#97M44_1@1	49.7	0.095	6.024	0.196	20.284	0.168	22.029	0.029	0	0.007	98.556		0.0621711	65.7107	33.9424	0.284726	100
	BF270_#97M44_2@1	49.614	0.043	4.913	0.186	19.864	0.122	21.844	0.031	0	0	96.629		0.0673534	66.036	33.6871	0.209549	100	0	0	100	100
	BF270_#97M44_3@1	48.978	0.074	5.583	0.225	20.212	0.143	21.711	0.039	0.043	0	97.026		0.0845308	65.4758	34.1946	0.245027	100
	97M44OPX (average, n=22 out of 23)	49.4891	0.097	5.63077	0.192136	19.7888	0.132864	22.1195	0.0407273	0.0132273	0.00709091	97.5113		0.0878332	66.3744	33.3113	0.22652	100
	%RSD	0.976321	76.861	8.67368	16.3099	3.26483	16.6174	2.0017	17.1822	120.961	280.837			48.1935	7.81194	7.14774	36.8468	100	1.01126	85.8521	13.1367	100
	BF064_97SL65_1@1	53.696	0.031	1.082	0.032	1.594	0.018	16.96	24.78	0.43	0	98.637		49.9229	47.5418	2.5066	0.0286681	100
	BF064_97SL65_1@2	53.397	0.021	1.204	0.024	1.634	0.011	16.73	24.793	0.406	0	98.25		50.2338	47.1644	2.58415	0.0176193	100
	BF064_97SL65_2@1	54.481	0.026	1.118	0.016	1.545	0.008	17.032	24.418	0.591	0	99.266		49.5008	48.0417	2.44472	0.0128209	100	1.20421	0.943431	97.8524	100
	BF106_97SL65_1@1	54.025	0.063	1.532	0.038	1.683	0.001	17.233	24.422	0.512	0	99.53		49.1246	48.2314	2.64241	0.00159018	100
	BF106_97SL65_2@1	54.17	0.062	1.165	0.021	1.631	0.01	17.657	24.997	0.359	0	100.113		49.1623	48.3184	2.50378	0.0155479	100
	BF106_97SL65_2@2	54.439	0.071	1.372	0.019	1.63	0.007	17.112	24.752	0.447	0.001	99.883		49.6635	47.7726	2.55278	0.0111033	100	1.19757	0.418659	98.3838	100
	BF106_97SL65_3@1	54.659	0.023	1.167	0.024	1.604	0.019	17.393	24.852	0.484	0	100.268		49.3883	48.0937	2.48809	0.02985	100
	BF106_97SL65_4@1	54.577	0.028	1.211	0.01	1.664	0	17.161	24.631	0.612	0	99.936		49.4523	47.94	2.60769	0	100	2.1338	0.0877909	97.7784	100
	BF117_97M44_1@1 --> 97SL65CPX	54.797	0.027	1.227	0.037	1.519	0.009	17.264	24.478	0.755	0	100.14		49.2596	48.3401	2.386	0.0143181	100	2.37736	0.362164	97.2605	100
	BF117_97M44_2@1 --> 97SL65CPX	54.436	0.042	1.165	0.007	1.623	0.011	17.333	24.842	0.471	0	99.943		49.452	48.0089	2.52182	0.0173108	100
	BF117_97M44_3@1 --> 97SL65CPX	54.625	0.019	1.056	0.042	1.626	0.003	17.295	24.58	0.647	0.001	99.915		49.243	48.2096	2.54262	0.00475129	100
	BF117_97M44_4@1 --> 97SL65CPX	54.62	0.039	1.162	0.019	1.631	0.01	17.444	24.657	0.537	0.002	100.135		49.1082	48.3405	2.53552	0.015745	100
	BF117_97M44_5@1 --> 97SL65CPX	55.038	0.031	1.165	0.034	1.476	0.007	17.459	24.463	0.606	0.013	100.33		49.0113	48.6695	2.30819	0.011087	100	1.48421	0.697552	97.8182	100
	BF132_97SL65_22@1	53.945	0.042	1.234	0.012	1.658	0.006	16.994	24.52	0.517	0	98.944		49.5711	47.803	2.61632	0.00958932	100
	BF132_97SL65_22@2	53.99	0.03	1.207	0.005	1.691	0.021	16.781	24.501	0.567	0	98.828		49.8124	47.4704	2.68346	0.0337521	100	1.67309	0.40453	97.9224	100
	BF132_97SL65_24@1	54.202	0.013	1.099	0.035	1.513	0.011	17.155	24.408	0.687	0.006	99.146		49.3419	48.2531	2.38738	0.0175794	100	2.38438	0.12568	97.4899	100
	BF132_97SL65_25@1	53.96	0.041	1.22	0.039	1.682	0.013	17.084	24.664	0.538	0	99.281		49.5681	47.7727	2.63854	0.0206543	100
	BF132_97SL65_31@1	54.342	0.048	1.133	0.008	1.673	0.015	16.857	24.459	0.619	0	99.199		49.6816	47.6418	2.65248	0.0240867	100	1.44713	0.809738	97.7431	100
	BF238_97SL65-cpx_1@1	54.379	0.014	0.864	0.027	1.499	0.009	17.347	24.634	0.496	0	99.292		49.3196	48.3236	2.34253	0.0142448	100
	BF238_97SL65-cpx_2@1	54.48	0.008	1.208	0.015	1.506	0.002	17.274	24.343	0.722	0.001	99.579		49.1231	48.5016	2.37211	0.00319058	100	2.36586	0.263754	97.3704	100
	BF238_97SL65-cpx_3@1	54.429	0.028	1.161	0.027	1.613	0.008	16.795	24.255	0.557	0.002	98.887		49.6125	47.7993	2.57527	0.0129362	100	0.178348	1.84535	97.9763	100
	BF258_97SL65_Px-1	55.157	0.08	1.126	0.027	1.568	0.014	17.594	25.145	0.445	0.001	101.189		49.4395	48.1324	2.40639	0.021761	100
	BF258_97SL65_Px-2	54.739	0.01	0.951	0.026	1.463	0	17.421	24.617	0.681	0	99.935		49.2355	48.4805	2.28395	0	100	2.27982	0.180515	97.5397	100
	BF259_Cpx#97SL65_Px-1	55.053	0.001	1.169	0.011	1.437	0.017	17.366	24.753	0.712	0	100.524		49.4555	48.2767	2.241	0.0268512	100	2.23356	0.332174	97.4343	100
	BF259_Cpx#97SL65_Px-2	54.791	0.024	1.048	0.022	1.538	0.026	17.363	24.806	0.669	0	100.306		49.4283	48.1387	2.39207	0.0409562	100	2.39158	0.0202437	97.5882	100
	BF259_Cpx#97SL65_Px-3	54.618	0.027	1.241	0.027	1.674	0	17.265	24.684	0.616	0	100.162		49.3551	48.0323	2.61258	0	100
	BF258_97SL65_Px-3	54.397	0.024	0.962	0.015	1.435	0	17.544	24.887	0.458	0.004	99.76		49.3616	48.4168	2.22161	0	100
	BF260_97SL65_Px-1	54.419	0.017	1.024	0.022	1.562	0.015	17.081	24.553	0.589	0.003	99.307		49.5515	47.9641	2.46054	0.0239316	100	1.78109	0.362196	97.8567	100
	BF260_97SL65_Px-2	55.632	0.007	1.067	0.014	1.575	0.012	17.752	25.25	0.388	0	101.737		49.3271	48.2528	2.40161	0.0185325	100	1.297	0.0736492	98.6294	100
	BF260_97SL65_Px-3	54.546	0.024	0.881	0.03	1.465	0.005	17.663	24.791	0.658	0.003	100.097		49.0768	48.6517	2.2637	0.00782493	100	2.26158	0.093421	97.645	100
	BF270_#97SL65_1@1	53.798	0	1.186	0.008	1.59	0.009	17.056	24.358	0.69	0	98.72		49.3698	48.1003	2.51545	0.0144208	100	2.51506	0.0153517	97.4696	100
	BF270_#97SL65_2@1	53.932	0.024	1.079	0	1.576	0.005	16.961	24.497	0.583	0.006	98.696		49.6589	47.8395	2.49367	0.00801276	100
	BF270_#97SL65_21@1	53.768	0.019	1.056	0.005	1.576	0.001	17.261	24.67	0.503	0.005	98.902		49.4212	48.1129	2.46433	0.0015837	100
	97SL65CPX (average, n=33)	54.4102	0.0292121	1.13764	0.0211515	1.58042	0.00918182	17.2329	24.6503	0.562182	0.00145455	99.6347		49.4301	48.0817	2.47367	0.0145555	100
	%RSD	0.854501	64.9387	11.2758	52.9128	4.79098	72.0612	1.52932	0.919257	18.6288	189.134			1.44187	3.33762	5.86559	89.3549	100	3.9899	31.9779	64.0322	100
	BF064_AG1_1@1	49.808	0.823	3.097	0.041	7.962	0.193	14.346	21.423	0.283	0	97.999		44.8637	41.802	13.0147	0.319522	100
	BF064_AG1_1@2	49.255	0.937	3.656	0.016	8.136	0.189	14.225	21.382	0.31	0	98.108		44.8499	41.5161	13.3206	0.313403	100
	BF064_AG1_2@1	49.309	0.866	3.344	0.012	8.18	0.212	13.959	21.31	0.337	0	97.552		45.0672	41.0754	13.5029	0.354439	100
	BF064_AG1_3@1	47.93	1.024	4.151	0.009	8.294	0.191	13.334	21.517	0.339	0	96.799		46.0802	39.7323	13.8642	0.323365	100
	BF064_AG1_4@1	49.005	0.933	3.821	0.049	8.177	0.221	13.85	21.571	0.356	0.003	97.993		45.5093	40.6566	13.4655	0.368596	100
	NRM-AG1 Cpx (average, n=5)	49.0614	0.9166	3.6138	0.0254	8.1498	0.2012	13.9428	21.4406	0.325	0.0006	97.6772		45.2707	40.962	13.4315	0.335843	100
	%RSD	1.41928	8.3696	11.3519	71.9838	1.47632	7.1543	2.82759	0.487171	8.82439	223.607			4.33827	35.0351	10.2616	50.3651	100	4.42421	56.8857	38.6901	100
	BF064_EN2_1@1	54.99	0.001	1.067	0.437	7.551	0.165	33.114	0.391	0	0.004	97.784		0.744903	87.778	11.2286	0.248505	100
	BF064_EN2_1@2	55.322	0	1.156	0.41	7.599	0.154	33.327	0.249	0	0	98.275		0.472726	88.0354	11.2607	0.231132	100
	BF064_EN2_1@3	55.606	0	1.099	0.4	7.397	0.145	33.101	0.512	0	0	98.31		0.976039	87.7989	11.0065	0.218521	100
	BF064_EN2_2@1	55.391	0.014	1.016	0.44	7.296	0.16	33.655	0.24	0	0	98.27		0.453782	88.5394	10.7676	0.239158	100
	BF064_EN2_2@2	55.066	0.018	1.103	0.468	7.508	0.167	33.252	0.355	0.032	0	98.014		0.674724	87.936	11.1383	0.250924	100
	BF064_EN2_2@3	55.493	0	1.19	0.465	7.544	0.141	33.289	0.295	0.024	0	98.498		0.560697	88.0355	11.192	0.211862	100
	BF106_NRM-EN-2_1@1	55.888	0	1.046	0.433	7.503	0.172	33.974	0.326	0	0	99.399		0.608326	88.2097	10.9283	0.253732	100
	BF106_NRM-EN-2_1@2	55.928	0.018	1.101	0.422	7.667	0.179	33.557	0.338	0	0	99.276		0.635876	87.8394	11.2585	0.266218	100
	BF106_NRM-EN-2_1@3	56.1	0.012	1.089	0.442	7.538	0.175	33.534	0.327	0	0	99.296		0.616886	88.0224	11.0997	0.26099	100
	BF106_NRM-EN-2_2@1	56.205	0.006	1.033	0.366	7.46	0.169	34.042	0.336	0	0	99.693		0.626184	88.2731	10.8517	0.248987	100
	BF106_NRM-EN-2_2@2	55.895	0.014	1.04	0.417	7.575	0.157	33.788	0.272	0.026	0	99.239		0.510116	88.1684	11.0887	0.23277	100
	BF106_NRM-EN-2_3@1	56.223	0.014	1.032	0.439	7.687	0.167	33.844	0.273	0	0	99.738		0.510323	88.0269	11.216	0.24679	100
	BF106_NRM-EN-2_3@2	55.917	0.054	1.033	0.364	7.364	0.163	33.674	0.351	0	0	98.984		0.661245	88.2675	10.8285	0.242757	100
	NRM-EN2 Opx (average, n=13)	55.6942	0.0116154	1.07731	0.423308	7.51454	0.162615	33.5501	0.328077	0.00630769	0.000307692	98.7683		0.618972	88.0724	11.0661	0.242541	100
	%RSD	0.743328	126.214	4.86307	7.61064	1.5071	6.84104	0.93861	21.6404	191.93	360.555			73.2805	4.42242	3.9835	18.3136	100	0.313131	92.1393	7.54758	100
	BF064_QJH01-1_2@1	52.372	0.089	5.868	0	10.621	0.012	7.79	14.769	5.317	0	96.842		43.5566	31.9662	24.4493	0.0279777	100	10.7004	13.7689	75.5307	100
	BF064_QJH01-1_3@1	52.856	0.071	5.852	0.007	9.712	0.007	8.799	15.651	4.986	0	97.961		44.1121	34.5064	21.366	0.015597	100	10.265	12.0908	77.6442	100
	BF064_QJH01-1_3@2	52.801	0.066	6.201	0	9.364	0.017	8.287	15.293	5.413	0.002	97.444		44.7871	33.7683	21.4052	0.0393584	100	11.1666	13.6149	75.2186	100
	BF064_QJH01-1_4@1	52.373	0.105	6.404	0.007	10.286	0.02	7.637	14.271	5.741	0	96.847		43.3221	32.2574	24.3725	0.0479969	100	12.3525	14.5854	73.0621	100
	BF064_QJH01-1_5@1	52.27	0.107	5.885	0.019	9.608	0.003	8.743	15.717	4.854	0	97.21		44.4186	34.38	21.1947	0.00670262	100	10.2069	11.7107	78.0824	100
	BF106_QJH01-1_3@1	53.091	0.072	5.954	0.005	9.735	0.009	8.858	15.528	5.079	0	98.331		43.7918	34.7587	21.4295	0.0200654	100	10.4874	12.2562	77.2563	100
	BF106_QJH01-1_4@1	52.5	0.072	5.751	0	10.449	0.018	8.185	14.988	5.359	0.001	97.343		43.3847	32.9657	23.6084	0.0411902	100	12.4356	12.2087	75.3557	100
	BF106_QJH01-1_5@1	52.791	0.088	4.999	0	10.146	0.021	9.119	15.997	4.66	0	97.84		43.6824	34.647	21.6252	0.0453331	100	10.1535	10.4642	79.3823	100
	BF106_QJH01-1_6@1	53.357	0.062	6.149	0	10.083	0.014	8.179	14.744	5.606	0	98.197		43.3576	33.4658	23.144	0.0325467	100	11.212	14.3421	74.4459	100
	BF106_QJH01-1_7@1	53.304	0.069	6.739	0.009	9.502	0.006	8.247	14.743	5.677	0	98.31		43.8267	34.1114	22.0478	0.0141004	100	11.0974	14.8936	74.009	100
	BF106_QJH01-1_8@1	53.174	0.092	5.998	0	9.702	0.013	8.702	15.474	5.264	0.006	98.427		44.0039	34.4317	21.5352	0.0292254	100	11.2986	12.4247	76.2767	100
	BF106_QJH01-1_9@1	52.82	0.085	5.719	0	9.727	0.018	8.512	15.695	4.947	0	97.528		44.6576	33.699	21.6029	0.0404888	100	9.13378	13.0215	77.8447	100
	QJH01-1OMP (average, n=12)	52.8091	0.0815	5.95992	0.00391667	9.91125	0.0131667	8.4215	15.2392	5.24192	0.00075	97.6822		43.9126	33.7651	22.2923	0.0299938	100	10.8652	12.9337	76.2011	100
	%RSD	0.705728	18.4643	7.06502	150.246	3.99594	44.7373	5.29502	3.44648	6.52827	235.273			6.99084	14.9442	6.32661	71.7384	100	5.3781	14.9923	79.6296	100
	BF064_QLP08-1_5@1	54.598	0.019	9.473	0.021	5.958	0.005	7.999	12.738	6.739	0	97.55		44.6599	39.0214	16.3048	0.0138585	100	5.00364	26.4456	68.5508	100
	BF064_QLP08-1_6@1	54.95	0.02	9.052	0.019	5.59	0.016	8.383	13.036	6.672	0.003	97.751		44.8343	40.1159	15.0064	0.0435025	100	4.91945	25.8651	69.2154	100
	BF064_QLP08-1_7@1	54.871	0.028	9.762	0.006	5.37	0.018	8.211	12.58	7.037	0	97.885		44.5933	40.4982	14.858	0.0504417	100	6.35336	26.7238	66.9228	100
	BF064_QLP08-1_8@1	54.276	0.043	8.692	0.012	5.838	0.004	8.932	13.789	6.226	0.004	97.834		44.803	40.3807	14.806	0.0102745	100	6.67692	21.91	71.413	100
	BF064_QLP08-1_9@1	54.803	0.006	10.404	0.016	5.147	0.005	7.888	12.296	7.335	0	97.913		45.0522	40.2134	14.7199	0.0144827	100	7.08978	27.9508	64.9594	100
	BF106_QLP08-1_1@1	54.749	0.029	8.863	0	5.646	0.016	9.274	13.942	6.327	0.005	98.872		44.5924	41.2718	14.0953	0.0404561	100	7.70646	21.1637	71.1298	100
	BF106_QLP08-1_2@1	55.481	0.026	9.409	0.017	5.48	0	8.731	13.535	6.672	0	99.352		45.1759	40.5474	14.2767	0	100	5.80749	24.5843	69.6083	100
	BF106_QLP08-1_3@1	55.069	0.058	9.753	0.021	5.337	0	8.779	13.027	7.131	0	99.186		44.2977	41.5368	14.1655	0	100	9.80325	23.6847	66.5121	100
	BF106_QLP08-1_4@1	54.612	0.043	8.588	0	5.937	0.012	9.164	14.044	6.11	0	98.545		44.6716	40.558	14.7403	0.0301752	100	6.38364	21.2963	72.32	100
	BF106_QLP08-1_5@1	55.042	0.107	9.639	0.007	6.045	0.017	8.102	12.55	7.263	0	98.792		43.9504	39.4786	16.5239	0.0470648	100	8.85861	25.4537	65.6877	100
	BF106_QLP08-1_7@1	55.105	0.051	9.073	0.014	5.801	0.016	8.778	13.714	6.334	0.003	98.922		45.0108	40.0865	14.8612	0.0415145	100	4.83016	23.8264	71.3434	100
	BF117_QLP08-1-cpx_1@1	55.273	0.032	9.01	0.003	5.873	0.008	8.729	13.41	6.631	0	98.973		44.4836	40.289	15.2065	0.0209792	100	6.3971	23.8961	69.7068	100
	BF117_QLP08-1-cpx_2@1	55.473	0.031	8.625	0	5.955	0.014	9.237	13.95	6.277	0.005	99.579		44.3398	40.8509	14.7741	0.0351784	100	5.92262	22.1755	71.9019	100
	BF117_QLP08-1-cpx_3@1	55.079	0.012	9.554	0.003	5.524	0.014	8.767	13.028	6.806	0	98.787		44.0892	41.2816	14.5917	0.0374551	100	7.07337	24.4263	68.5003	100
	BF117_QLP08-1-cpx_4@1	54.954	0.03	8.641	0.013	5.929	0	9.108	13.809	6.377	0	98.869		44.3881	40.736	14.8759	0	100	7.23514	21.7801	70.9847	100
	BF117_QLP08-1-cpx_5@1	55.243	0.017	9.754	0.009	5.435	0.013	8.718	13.723	6.688	0.006	99.614		45.5827	40.292	14.0912	0.0341368	100	6.97714	23.6973	69.3256	100
	QLP08-1OMP (average, n=16)	54.9736	0.0345	9.26825	0.0100625	5.67906	0.009875	8.675	13.3232	6.66406	0.001625	98.6393		44.6575	40.4582	14.858	0.0261669	100	6.68024	24.0287	69.2911	100
	%RSD	0.586763	68.9343	5.71153	75.2895	4.81689	66.9555	5.07757	4.29793	5.67744	140.104			6.31545	10.3813	5.52472	77.7785	100	5.04209	8.73593	86.222	100
	BF064_UWC3_1@1	52.91	0.111	1.394	0	4.377	0.212	15.246	24.639	0.135	0	99.041		49.8399	42.9103	6.91081	0.339014	100
	BF064_UWC3_3@1	52.868	0.088	1.362	0	4.263	0.192	15.307	24.674	0.098	0.001	98.862		49.8955	43.0688	6.72877	0.306938	100
	BF064_UWC3_3@2	52.758	0.087	1.131	0	4.214	0.212	15.414	24.664	0.155	0	98.635		49.7581	43.268	6.6358	0.338115	100
	BF064_UWC3_4@1	52.741	0.089	1.421	0.018	4.381	0.18	15.381	24.554	0.135	0	98.9		49.5871	43.2197	6.90586	0.287374	100
	BF064_UWC3_6@1	52.5	0.083	1.472	0	4.307	0.21	15.208	24.676	0.152	0	98.608		49.9877	42.8658	6.81022	0.336307	100
	BF106_UWC3_1@1	53.922	0.04	0.873	0	3.918	0.225	16.073	24.799	0.1	0	99.954		49.2054	44.3738	6.06794	0.35293	100
	BF106_UWC3_1@2	53.666	0.031	0.855	0	3.938	0.212	16.153	24.653	0.106	0	99.625		48.9442	44.6206	6.10247	0.332733	100
	BF106_UWC3_1@3	53.726	0.079	0.999	0	3.949	0.199	15.946	24.812	0.106	0	99.826		49.388	44.1634	6.13543	0.313142	100
	BF106_UWC3_2@1	53.411	0.062	1.199	0	3.901	0.191	15.873	24.851	0.133	0	99.621		49.5706	44.0545	6.07372	0.301191	100
	BF106_UWC3_2@2	53.452	0.047	1.156	0	3.714	0.185	15.825	24.688	0.114	0.006	99.221		49.6221	44.2572	5.82679	0.29396	100
	BF106_UWC3_3@1	53.86	0.07	0.955	0.006	3.996	0.215	15.964	24.687	0.106	0	99.86		49.1888	44.2578	6.21472	0.33866	100
	BF106_UWC3_3@2	53.556	0.059	1.004	0	3.965	0.204	15.741	24.685	0.089	0.003	99.306		49.5254	43.9418	6.20921	0.323559	100	0.290241	0.0327807	99.677	100
	BF106_UWC3_3@3	53.832	0.053	1.113	0	3.96	0.18	15.66	24.786	0.094	0.004	99.692		49.7626	43.7461	6.20569	0.285691	100	0	0.340355	99.6596	100
	95AK24 (or UWC3CPX) Cpx (average, n=13)	53.3232	0.0691538	1.14877	0.00184615	4.06792	0.201308	15.6762	24.7052	0.117154	0.00107692	99.3119		49.5577	43.7537	6.36933	0.319235	100
	%RSD	0.93421	33.1849	18.3227	277.826	5.23468	7.23675	2.10141	0.335657	18.9392	183.619			2.56884	22.3771	31.2702	43.7839	100	9.44642	69.791	20.7626	100
	BF106_06JY31_1@1	52.502	0.265	4.761	1.035	2.81	0.089	16.77	20.001	1.088	0.01	99.375		43.8634	51.1722	4.81011	0.154301	100	0.787105	3.38461	95.8283	100
	BF106_06JY31_1@2	52.686	0.249	4.785	1.054	2.854	0.077	17.074	20.225	1.127	0.002	100.185		43.7106	51.3434	4.81449	0.131558	100	2.12434	2.18695	95.6887	100
	BF106_06JY31_2@1	51.34	0.275	4.598	1.079	2.786	0.072	16.299	20.153	1.168	0	97.814		44.7219	50.326	4.8257	0.126311	100	2.56366	2.03149	95.4049	100
	BF106_06JY31_2@2	52.077	0.282	4.695	1.103	2.699	0.073	16.416	20.482	1.156	0.002	99.019		45.0277	50.2141	4.63136	0.12687	100	1.86789	2.61094	95.5212	100
	BF106_06JY31_3@1	52.446	0.248	4.673	1.092	2.774	0.075	16.785	20.041	1.074	0.001	99.262		43.9302	51.1936	4.74623	0.129967	100	0.816648	3.30291	95.8804	100
	BF106_06JY31_3@2	52.438	0.233	4.649	1.136	2.847	0.071	16.592	20.337	1.028	0.009	99.4		44.4997	50.515	4.86246	0.122817	100	0.713865	3.22539	96.0607	100
	BF106_06JY31_4@1	52.143	0.259	4.651	1.083	2.902	0.066	16.703	20.154	1.069	0.013	99.106		44.0893	50.8413	4.95527	0.114141	100	1.62646	2.49969	95.8739	100
	06JY31CPX (average, n=7)	52.2331	0.258714	4.68743	1.08314	2.81029	0.0747143	16.6627	20.199	1.10143	0.00528571	99.1159		44.261	50.8029	4.80663	0.129427	100	1.49562	2.75174	95.7526	100
	%RSD	0.854348	6.53948	1.40435	3.02724	2.34066	9.61172	1.54062	0.828708	4.60562	98.7381			6.6843	17.2903	14.7364	61.2891	100	9.66391	34.4213	55.9147	100
	BF106_06JY34_1@1	55.432	0.063	3.024	0.529	5.053	0.119	33.905	0.651	0.115	0.014	98.982		1.25519	90.9588	7.60462	0.181387	100
	BF106_06JY34_2@1	55.405	0.109	3.008	0.53	5.001	0.128	34.262	0.707	0.12	0.004	99.357		1.34966	91.0054	7.45176	0.193171	100
	BF106_06JY34_2@2	55.874	0.073	2.955	0.525	4.923	0.126	34.765	0.689	0.097	0	100.111		1.29992	91.2623	7.24981	0.18793	100
	BF106_06JY34_3@1	55.449	0.1	3.075	0.534	4.934	0.113	34.242	0.708	0.1	0	99.336		1.35392	91.1105	7.36472	0.17083	100
	BF106_06JY34_4@1	55.387	0.074	3.082	0.511	5.113	0.121	34.702	0.714	0.163	0.002	99.954		1.34502	90.9568	7.51802	0.180195	100
	BF106_06JY34_5@1	55.292	0.052	3.013	0.533	5.019	0.115	34.644	0.679	0.095	0	99.531		1.28377	91.1375	7.40685	0.171887	100
	BF106_06JY34_6@1	55.607	0.065	2.869	0.534	5.047	0.111	34.396	0.637	0.083	0	99.44		1.21281	91.1197	7.50041	0.167072	100
	06JY34OPX (average, n=7)	55.4923	0.0765714	3.00371	0.528	5.01286	0.119	34.4166	0.683571	0.110429	0.00285714	99.4459		1.30012	91.0791	7.4419	0.178927	100
	%RSD	0.347561	26.8795	2.44069	1.5464	1.34504	5.42435	0.896416	4.36905	23.8323	180.093			39.884	11.386	9.58399	39.146	100	1.97968	79.3438	18.6765	100
	BF106_2C42_1@1	53.69	0.067	2.026	1.011	2.028	0.068	16.793	22.467	0.803	0	98.994		47.3294	49.2227	3.33467	0.113246	100	0.446258	2.53727	97.0165	100
	BF106_2C42_2@1	53.952	0.064	2.098	1.09	1.949	0.066	16.665	22.348	1.025	0	99.289		47.4388	49.2211	3.22928	0.110756	100	0.861147	2.95971	96.1791	100
	BF106_2C42_3@1	53.83	0.117	1.758	1.021	1.959	0.06	16.954	22.685	0.85	0	99.273		47.4073	49.298	3.1955	0.0991256	100	1.23709	1.91583	96.8471	100
	BF106_2C42_4@1	53.852	0.097	1.724	1.126	1.907	0.062	17.02	22.85	0.875	0	99.558		47.5358	49.2657	3.09659	0.101966	100	1.85721	1.39103	96.7518	100
	BF106_2C42_5@1	54.416	0.098	1.577	0.885	1.937	0.052	17.195	23.045	0.789	0	100.034		47.4929	49.3066	3.11587	0.0847194	100	1.05397	1.83456	97.1115	100
	BF106_2C42_6@1	53.742	0.086	1.406	1.022	1.842	0.048	17.154	23.284	0.539	0.002	99.165		47.8821	49.0831	2.95668	0.0780343	100	0.737331	1.24355	98.0191	100
	BF106_2C42_7@1	54.33	0.093	1.492	1.028	1.858	0.043	17.003	22.675	1.005	0	99.564		47.4202	49.4758	3.03292	0.0710907	100	1.39022	2.32475	96.285	100
	2C42CPX (average, n=7)	53.9731	0.0888571	1.72586	1.02614	1.92571	0.057	16.9691	22.7649	0.840857	0.000285714	99.3719		47.5022	49.2674	3.13645	0.0940267	100	1.08317	2.02757	96.8893	100
	%RSD	0.530919	20.8673	15.1237	7.36253	3.29679	16.6127	1.10949	1.42587	19.2585	264.575			7.63474	8.26587	13.7786	70.3208	100	5.05028	63.3469	31.6028	100
	BF106_97M43_1@1	49.139	0.094	5.197	0.263	20.923	0.193	21.236	0.035	0	0.002	97.114		0.0759769	64.1412	35.4516	0.331207	100
	BF106_97M43_14@1	49.335	0.139	5.294	0.069	21.333	0.209	20.633	0.028	0.025	0.003	97.084		0.0614665	63.0222	36.5536	0.362706	100	0	0.0992152	99.9008	100
	BF106_97M43_15@1	50.482	0.022	3.432	0.209	21.467	0.23	21.142	0.018	0.025	0	97.039		0.0388159	63.4358	36.1333	0.392097	100	0	0.0974638	99.9025	100
	BF106_97M43_19@1	49.379	0.073	5.109	0.278	21.232	0.204	21.245	0.019	0.025	0	97.591		0.0410252	63.827	35.7838	0.348221	100
	BF106_97M43_2@1	49.374	0.263	5.974	0.316	20.579	0.182	21.486	0.045	0	0.003	98.247		0.0975139	64.7829	34.8078	0.311784	100	0	0	100	100
	BF106_97M43_5@1	49.065	0.092	5.572	0.256	20.349	0.159	21.294	0.039	0	0.001	96.851		0.0853832	64.8658	34.7736	0.27519	100	0	0	100	100
	BF106_97M43_7@1	49.087	0.115	5.707	0.209	20.41	0.197	20.899	0.046	0	0.007	96.699		0.101744	64.3173	35.2365	0.344465	100	0	0	100	100
	97M43OPX (average, n=7)	49.4087	0.114	5.18357	0.228571	20.899	0.196286	21.1336	0.0328571	0.0107143	0.00228571	97.2096		0.0715751	64.0554	35.535	0.338025	100	0	0.0422183	99.9578	100
	%RSD	0.996278	65.8927	16.0163	34.9333	2.19834	11.3223	1.33629	35.1179	124.722	106.311			73.7092	3.90251	3.60152	18.7868	100	0.631712	82.4599	16.9084	100
	BF106_97SL17_1@1	55.297	0.07	12.54	0.015	4.226	0.014	7.54	11.959	7.588	0	99.261		46.4251	40.7268	12.8052	0.0429649	100	4.11919	32.084	63.7968	100
	BF106_97SL17_2@1	55.628	0.06	12.979	0.012	4.249	0.017	7.219	11.313	7.926	0	99.411		45.8249	40.6866	13.4341	0.0544378	100	3.75192	34.3752	61.8728	100
	BF106_97SL17_3@1	55.004	0.068	12.768	0.012	4.193	0.022	7.562	12.239	7.32	0	99.198		46.981	40.3891	12.5632	0.0667616	100	3.03746	31.6947	65.2679	100
	BF106_97SL17_4@1	55.386	0.054	13.094	0	4.05	0.024	7.143	11.664	7.236	0	98.651		47.0647	40.1032	12.7556	0.0765573	100	0	34.5707	65.4293	100
	BF106_97SL17_5@1	55.398	0.034	13.023	0.033	3.982	0.011	7.382	11.463	7.676	0	99.022		46.1267	41.3313	12.507	0.0349925	100	2.38696	34.3234	63.2896	100
	BF106_97SL17_6@1	55.525	0.056	13.057	0.026	4.807	0.02	6.921	11.021	7.775	0.002	99.218		45.1334	39.4363	15.3656	0.0647492	100	1.85219	35.3808	62.767	100
	BF106_97SL17_7@1	55.641	0.039	12.6	0	3.964	0.019	7.208	11.405	7.817	0	98.702		46.4689	40.8633	12.6066	0.0611996	100	2.31494	35.0943	62.5907	100
	97SL17OMP (average, n=7)	55.4113	0.0544286	12.8659	0.014	4.21014	0.0181429	7.28214	11.5806	7.61971	0.000285714	99.0566		46.2973	40.5076	13.1378	0.0573403	100	2.20135	34.1171	63.6816	100
	%RSD	0.398412	25.0538	1.77388	87.7729	6.83313	24.9413	3.1417	3.54823	3.38044	264.575			10.7619	13.2584	16.1768	59.8029	100	15.8012	2.322	81.8768	100
	BF106_97SL21_1@1	54.661	0.091	12.4	0.002	4.474	0.013	7.679	12.547	7.227	0.005	99.102		46.9328	39.9661	13.0626	0.0384422	100	4.79261	29.6315	65.5759	100
	BF106_97SL21_2@1	53.826	0.144	12.012	0.011	5.014	0.035	8.019	13.61	6.475	0	99.161		47.4068	38.8646	13.6322	0.0963783	100	4.67168	25.6668	69.6615	100
	BF106_97SL21_3@1	54.674	0.076	12.496	0	4.364	0	7.827	12.258	7.244	0.012	98.966		46.1612	41.0113	12.8275	0	100	4.52796	30.0188	65.4533	100
	BF106_97SL21_4@1	54.628	0.077	12.658	0.001	4.637	0.023	7.144	12.302	7.237	0.004	98.713		47.5353	38.409	13.9854	0.0702581	100	2.74404	31.7789	65.4771	100
	BF106_97SL21_5@1	54.831	0.088	11.911	0	4.595	0.017	8.17	12.904	6.996	0.003	99.537		46.2978	40.7858	12.8683	0.0482184	100	5.08465	27.7386	67.1768	100
	BF106_97SL21_6@1	55.088	0.058	12.274	0.023	4.016	0.004	7.65	12.209	7.252	0.001	98.585		46.9739	40.9533	12.0606	0.0121665	100	2.04378	32.1933	65.7629	100
	BF106_97SL21_7@1	54.921	0.081	12.225	0.023	4.183	0.011	7.569	12.274	7.249	0	98.55		47.0643	40.3827	12.5196	0.0333447	100	2.61281	31.7283	65.6589	100
	97SL21OMP (average, n=7)	54.6613	0.0878571	12.2823	0.00857143	4.469	0.0147143	7.72257	12.5863	7.09714	0.00357143	98.9333		46.9089	40.0471	13.0007	0.0433536	100	3.78439	29.812	66.4036	100
	%RSD	0.738348	30.6785	2.14113	123.258	7.30341	80.0976	4.30921	4.07576	4.07692	117.53			5.15311	7.5807	7.2075	80.0587	100	7.05785	2.07634	90.8658	100
	BF106_GQ01-8_1@1	54.374	0.033	6.877	0.004	8.669	0	7.966	13.646	6.427	0.001	98.002		43.3256	35.1909	21.4836	0	100	10.1862	19.5289	70.285	100
	BF106_GQ01-8_2@1	54.425	0.015	6.711	0.001	8.676	0	8.494	14.087	6.099	0.002	98.51		43.1091	36.1671	20.7238	0	100	9.92877	17.8258	72.2455	100
	BF106_GQ01-8_3@1	54.078	0.053	7.542	0.039	8.132	0.021	7.829	13.045	6.643	0.003	97.393		43.0496	35.9486	20.947	0.0547864	100	9.98242	21.2564	68.7612	100
	BF106_GQ01-8_4@1	54.543	0.008	6.995	0.019	7.898	0	8.347	14.119	6.432	0.008	98.369		44.2633	36.4101	19.3266	0	100	10.9103	18.7412	70.3486	100
	BF106_GQ01-8_5@1	54.32	0.026	7.357	0.004	7.527	0.005	8.62	13.852	6.212	0.007	97.948		43.6628	37.8057	18.5191	0.0124594	100	8.88728	19.6012	71.5115	100
	BF106_GQ01-8_6@1	54.932	0.029	8.49	0	6.965	0.01	8.307	13.447	6.615	0.001	98.796		44.1613	37.9587	17.854	0.0259624	100	7.89111	22.5549	69.554	100
	BF106_GQ01-8_7@1	54.783	0.049	8.469	0.011	6.179	0.001	8.919	13.929	6.29	0.002	98.643		44.6977	39.8229	15.4768	0.00253684	100	6.9552	21.6596	71.3852	100
	GQ01-8OMP (average, n=7)	54.4936	0.0304286	7.49157	0.0111429	7.72086	0.00528571	8.35457	13.7321	6.38829	0.00342857	98.2313		43.7506	37.0357	19.2004	0.013313	100	9.24261	20.1627	70.5947	100
	%RSD	0.529878	54.0627	9.75807	125.152	11.821	148.853	4.47326	2.80402	3.15743	83.956			2.06284	4.57886	6.78789	86.5704	100
	BF106_NIJ-Jd_1@1	57.391	0.037	25.756	0	0.186	0.005	0.024	0.059	14.783	0.007	98.259		24.4278	13.826	60.1097	1.63656	100	0.540752	99.1004	0.358857	100
	BF106_NIJ-Jd_1@2	57.918	0	26.147	0	0.009	0	0	0.041	14.814	0.002	98.939		85.3724	0	14.6276	0	100	0	99.8212	0.178825	100
	BF106_NIJ-Jd_1@3	57.916	0.018	25.955	0.002	0.01	0.006	0	0.008	14.837	0.004	98.771		38.9318	0	37.9851	23.0831	100	0	99.9235	0.0764747	100
	BF106_NIJ-Jd_2@1	58.179	0	25.963	0	0	0.004	0	0.105	14.732	0.002	98.992		97.0764	0	0	2.92356	100	0	99.5959	0.404079	100
	BF106_NIJ-Jd_2@2	58.35	0.001	26.009	0.006	0.042	0.002	0	0.045	14.766	0	99.24		56.7008	0	41.307	1.99221	100	0	99.7039	0.296131	100
	BF106_NIJ-Jd_3@1	58.646	0	26.119	0	0.02	0.004	0.009	0.066	14.938	0.001	99.822		67.8345	12.8706	16.0448	3.25008	100	0	99.6414	0.358634	100
	BF106_NIJ-Jd_3@2	58.104	0	25.691	0	0.025	0.001	0.011	0.05	14.793	0	98.679		58.4047	17.8781	22.7938	0.923434	100	0	99.6812	0.318779	100
	NIJ-JD (average, n=7)	58.072	0.008	25.9486	0.00114286	0.0417143	0.00314286	0.00628571	0.0534286	14.809	0.00228571	98.9456		54.9569	8.9961	33.4913	2.55565	100	0	99.6385	0.361463	100
	%RSD	0.678333	180.133	0.659562	198.431	155.931	69.7793	145.437	54.833	0.44588	109.271			12.6324	46.6195	28.0396	12.7086	100
	BF106_NSH6_1@1	48.931	0.884	9.093	0	6.501	0.121	14.553	16.828	1.651	0	98.587		39.8324	47.93	12.0111	0.226422	100	4.46255	2.43708	93.1004	100
	BF106_NSH6_1@2	49.166	0.936	8.948	0.008	6.335	0.119	14.667	16.746	1.712	0.011	98.657		39.6896	48.3679	11.7195	0.222967	100	4.30429	2.83061	92.8651	100
	BF106_NSH6_1@3	49.237	0.913	8.937	0	6.431	0.098	14.778	16.781	1.63	0.001	98.818		39.5403	48.4495	11.8277	0.182548	100	4.00067	2.75788	93.2414	100
	BF106_NSH6_2@1	48.786	0.934	8.897	0.017	6.478	0.127	14.694	16.797	1.61	0.008	98.365		39.6165	48.221	11.9257	0.236797	100	4.75127	1.98403	93.2647	100
	BF106_NSH6_2@2	48.884	0.927	9.117	0.007	6.477	0.125	14.902	16.751	1.516	0.004	98.727		39.2847	48.6271	11.8565	0.231751	100	4.27362	2.02965	93.6967	100
	BF106_NSH6_2@3	48.916	0.94	9.081	0.016	6.337	0.118	14.59	16.694	1.521	0.006	98.248		39.7154	48.2953	11.7674	0.221926	100	2.84273	3.47768	93.6796	100
	NSH6CPX (average, n=6)	48.9867	0.922333	9.01217	0.008	6.4265	0.118	14.6973	16.7662	1.60667	0.005	98.5488		39.6125	48.3157	11.8514	0.220398	100	4.10464	2.58696	93.3084	100
	%RSD	0.357942	2.28113	1.05609	92.5338	1.14675	8.80704	0.869626	0.277698	4.75442	83.9047			2.97157	12.9478	9.57813	74.5025	100	5.24864	45.2018	49.5495	100
	BF106_NSH9_1@1	49.353	0.872	8.975	0.007	6.467	0.124	14.986	16.315	1.567	0	98.698		38.5585	49.2799	11.9298	0.231677	100	2.98411	3.48419	93.5317	100
	BF106_NSH9_1@2	49.157	0.891	8.923	0	6.512	0.117	14.895	16.246	1.574	0.004	98.345		38.5467	49.1736	12.0602	0.21946	100	3.08528	3.44047	93.4743	100
	BF106_NSH9_1@3	49.385	0.882	9.006	0	6.504	0.099	15.083	16.294	1.581	0.009	98.891		38.3972	49.4551	11.9633	0.184432	100	3.34595	3.18161	93.4724	100
	BF106_NSH9_2@1	48.934	0.847	8.766	0.011	6.415	0.125	14.738	16.419	1.622	0.018	97.93		39.0636	48.7883	11.913	0.235106	100	3.87608	2.90448	93.2194	100
	BF106_NSH9_2@2	49.648	0.879	9.115	0.002	6.416	0.114	14.812	16.33	1.605	0.005	98.956		38.8463	49.0262	11.9131	0.214386	100	2.04953	4.5456	93.4049	100
	BF106_NSH9_2@3	49.174	0.866	8.981	0	6.453	0.12	15.109	16.398	1.332	0.006	98.459		38.5361	49.4041	11.8369	0.222939	100	2.00393	3.46443	94.5316	100
	BF106_NSH9_2@4	49.292	0.842	8.933	0.002	6.523	0.116	14.985	16.263	1.45	0.007	98.419		38.4502	49.2953	12.0377	0.216812	100	2.19176	3.77764	94.0306	100
	NSH9CPX (average, n=7)	49.2776	0.868429	8.957	0.00314286	6.47	0.116429	14.944	16.3236	1.533	0.007	98.5001		38.6277	49.2041	11.9505	0.217806	100	2.78747	3.54454	93.668	100
	%RSD	0.452226	2.09272	1.17517	135.528	0.690289	7.46889	0.915281	0.397975	6.81745	79.966			4.9043	15.6938	6.63974	72.7622	100	2.70577	59.2488	38.0454	100
	BF117_MB04-8-7B@1	50.053	0.04	0.911	0.013	29.464	0.556	16.364	0.511	0	0	97.921		1.09381	48.7374	49.228	0.940859	100	0	0	100	100
	BF117_MB04-8-7B@1B	49.894	0.033	0.882	0	29.233	0.543	16.05	0.463	0	0	97.098		1.00561	48.5035	49.5586	0.932341	100	0	0	100	100
	BF117_MB04-8-7B@2	49.996	0.067	0.859	0	29.787	0.572	16.38	0.498	0.035	0.003	98.201		1.05977	48.5005	49.4774	0.96229	100
	BF117_MB04-8-7B@3	49.858	0.042	0.789	0.012	29.669	0.526	15.899	0.454	0	0	97.256		0.983756	47.935	50.1803	0.901043	100	0	0	100	100
	BF117_MB04-8-7B@4	49.817	0.057	0.896	0	29.877	0.534	16.224	0.476	0	0	97.881		1.01726	48.2428	49.8378	0.902179	100
	BF117_MB04-8-7C@1	49.534	0.037	0.974	0	30.338	0.908	15.159	0.61	0	0	97.56		1.3232	45.7529	51.3668	1.55708	100	0	0	100	100
	BF117_MB04-8-7C@2	49.353	0.056	1.203	0.008	30.664	0.917	14.971	0.546	0	0	97.718		1.18602	45.2483	51.991	1.5747	100	0	0	100	100
	BF117_MB04-8-7C@3	49.46	0.032	1.2	0.001	30.251	0.909	15.045	0.653	0.007	0	97.564		1.42212	45.5895	51.4233	1.565	100	0	0.0275797	99.9724	100
	BF117_MB04-8-7C@4	49.543	0.058	1.032	0	30.367	0.927	14.982	0.522	0	0	97.434		1.13965	45.5115	51.7489	1.59996	100	0	0	100	100
	BF117_MB04-8-7C@5	49.245	0.049	1.058	0	30.291	0.911	14.87	0.577	0	0	97.005		1.2645	45.3424	51.8148	1.5783	100	0	0	100	100
	BF117_MB04-8-7C@6	49.293	0.044	0.966	0.013	30.564	0.922	14.855	0.494	0.036	0	97.193		1.07981	45.1799	52.1471	1.59324	100	0	0.142199	99.8578	100
	BF117_MB04-8-7C@7	49.089	0.044	1.098	0.003	30.57	0.939	15.025	0.479	0.05	0.003	97.3		1.04157	45.4588	51.8855	1.61416	100
	MB04-8OPX (average, n=12)	49.5946	0.0465833	0.989	0.00416667	30.0896	0.763667	15.4853	0.523583	0.0106667	0.0005	97.5077		1.13428	46.6775	50.8804	1.30788	100	0	0.0417996	99.9582	100
	%RSD	0.646654	23.4883	13.3809	134.926	1.56199	25.2021	4.09081	11.8054	172.048	233.55			30.5523	14.7307	3.15528	51.5617	100	0.349578	88.9209	10.7296	100
	BF132_1594_1@1	50.043	0.064	1.034	0	15.281	0.711	8.232	21.524	1.179	0.001	98.071		47.3392	25.1915	26.233	1.23622	100
	BF132_1594_2@1	48.551	0.147	2.085	0	16.252	0.649	7.324	20.723	1.426	0	97.18		46.9781	23.1016	28.7573	1.1631	100
	BF132_1594_4@1	49.732	0.126	1.936	0	15.901	0.667	7.746	21.032	1.526	0	98.666		47.0004	24.0852	27.736	1.17835	100
	BF132_1594_4@2	49.275	0.113	1.788	0	15.731	0.702	7.658	21.237	1.25	0	97.769		47.4824	23.8235	27.4533	1.24081	100
	BF132_1594_8@1	50.334	0.051	1.095	0.004	15.619	0.715	8.025	21.771	1.225	0	98.841		47.6457	24.4366	26.6807	1.23703	100
	1594CPX (average, n=5)	49.587	0.1002	1.5876	0.0008	15.7568	0.6888	7.797	21.2574	1.3212	0.0002	98.097		47.2917	24.1353	27.3616	1.21142	100
	%RSD	1.4108	40.9996	30.8269	223.607	2.27071	4.24065	4.4745	1.92769	11.1927	223.607			14.5175	46.887	13.348	25.2474	100	5.58049	58.1923	36.2272	100
	BF132_1984_1@1	47.152	0.033	0.613	0	24.071	2.938	0.839	22.284	0.139	0	98.069		50.0061	2.61965	42.1621	5.21207	100
	BF132_1984_5@1	47.014	0.014	0.468	0	24.449	2.466	1.097	22.182	0.208	0	97.898		49.5782	3.41152	42.653	4.35724	100
	BF132_1984_6@1	47.215	0.01	0.395	0	23.814	2.762	1.065	22.414	0.197	0.004	97.876		50.1799	3.3175	41.6142	4.88835	100
	BF132_1984_9@1	47.336	0.013	0.532	0	24.785	2.419	0.764	22.24	0.201	0	98.299		49.9089	2.38554	43.4141	4.29148	100
	1984HD (average, n=12)	47.1792	0.0175	0.502	0	24.2797	2.64625	0.94125	22.28	0.18625	0.001	98.0332		49.9181	2.93426	42.4605	4.68708	100
	%RSD	0.284104	59.8411	18.4826		1.75454	9.32431	17.5052	0.442626	17.088	200			1.31969	72.6195	4.08317	21.9777	100	2.17059	46.8407	50.9888	100
	BF132_22779A_1@1	46.494	0	0.547	0	20.482	6.752	0.9	21.776	0.051	0	97.002		49.0968	2.82338	36.0451	12.0347	100
	BF132_22779A_2@1	46.966	0	0.407	0	20.179	6.983	0.88	21.735	0.077	0.003	97.232		49.1403	2.76829	35.6104	12.481	100
	BF132_22779B_1@1	47.143	0	0.544	0	20.71	6.818	0.845	21.875	0	0	97.959		49.0407	2.63582	36.2399	12.0835	100
	BF132_22779B_2@1	46.816	0	0.631	0	20.517	6.919	0.715	21.856	0.007	0.006	97.467		49.2973	2.24393	36.1214	12.3374	100
	BF132_22779C_1@1	47.358	0	0.206	0	19.269	8.645	0.546	21.721	0.022	0	97.767		48.9704	1.71277	33.9087	15.408	100
	BF132_22779C_2@1	46.859	0	0.509	0	19.568	7.479	0.634	21.709	0	0.001	96.767		49.5895	2.01507	34.8895	13.5059	100
	22779HD (average, n=6)	46.9393	0	0.474	0	20.1208	7.266	0.753333	21.7787	0.0261667	0.00166667	97.36		49.1882	2.36738	35.471	12.9734	100
	%RSD	0.630154		31.6338		2.87154	9.9481	19.2047	0.326965	120.304	145.327			0.880022	71.9203	6.03261	21.1671	100	0.887253	85.2924	13.8204	100
	BF132_24516_1@1	47.296	0.017	0.351	0	21.216	6.366	0.191	22.316	0	0	97.753		50.5179	0.601607	37.4879	11.3926	100
	BF132_24516_3@1	47.024	0.001	0.208	0	22.302	5.419	0.333	22.314	0.004	0	97.617		50.1787	1.04193	39.1457	9.63362	100
	BF132_24516_4@1	47.134	0	0.355	0	20.765	6.906	0.223	22.312	0.029	0	97.732		50.3772	0.70057	36.5954	12.3268	100
	BF132_24516_4@2	46.99	0	0.383	0	20.993	6.586	0.223	22.286	0.029	0.002	97.492		50.4336	0.702172	37.0818	11.7825	100
	BF132_24516_5@1	47.449	0	0.178	0	22.175	5.393	0.312	22.384	0.044	0	97.936		50.4256	0.977955	38.992	9.60444	100
	24516HD (average, n=5)	47.1786	0.0036	0.295	0	21.4902	6.134	0.2564	22.3224	0.0212	0.0004	97.7018		50.3864	0.805269	37.8626	10.9457	100
	%RSD	0.408209	208.426	32.0415		3.2708	11.2783	24.2526	0.163669	87.8296	223.607			0.360682	74.3646	5.62613	19.6485	100	1.26535	77.5095	21.2252	100
	BF132_37087_1@1	48.565	0.069	0.566	0	20.717	1.141	4.268	22.753	0.118	0	98.222		49.7181	12.9763	35.3346	1.97101	100
	BF132_37087_1@2	48.498	0.086	0.521	0	20.895	1.148	4.218	22.664	0.125	0	98.184		49.5388	12.8282	35.6492	1.98371	100
	BF132_37087_4@1	48.366	0.141	0.956	0	20.814	1.029	4.591	22.61	0.152	0.009	98.693		49.0906	13.8694	35.2738	1.76621	100
	BF132_37087_5@1	48.643	0.093	0.493	0	20.805	1.128	4.317	22.681	0.052	0.002	98.235		49.5017	13.1096	35.4425	1.94623	100
	BF132_37087_6@1	48.877	0.063	0.379	0	21.004	1.14	4.231	22.897	0.163	0.001	98.803		49.6899	12.7757	35.5787	1.95579	100
	37087HD (average, n=5)	48.5898	0.0904	0.583	0	20.847	1.1172	4.325	22.721	0.122	0.0024	98.3978		49.5075	13.1124	35.4557	1.92443	100
	%RSD	0.391087	34.0737	37.6752		0.518338	4.45996	3.55111	0.487969	35.507	157.564			5.2137	52.792	4.32279	37.6715	100	0.552643	87.2156	12.2318	100
	BF132_R1213_1@1	46.502	0.026	0.542	0	21.277	6.993	0.2	21.541	0.07	0	97.165		49.0067	0.633097	37.7831	12.5771	100
	BF132_R1213_2@1	46.275	0.027	0.525	0	21.243	6.736	0.302	21.47	0.051	0.004	96.638		49.0222	0.959442	37.8595	12.1588	100
	BF132_R1213_3@1	46.254	0.003	0.483	0	21.349	7.058	0.209	21.511	0.029	0	96.898		48.8383	0.660233	37.8334	12.668	100
	BF132_R1213_4@1	46.435	0.013	0.48	0	21.414	7.05	0.225	21.461	0.026	0	97.114		48.7063	0.710508	37.9343	12.6489	100
	BF132_R1213_5@1	46.593	0.002	0.578	0	21.285	7.098	0.288	21.426	0.124	0	97.395		48.638	0.909658	37.7144	12.7379	100
	BF132_R1213_5@2	46.744	0.018	0.515	0	20.783	6.993	0.283	21.549	0.025	0	96.91		49.3189	0.901206	37.1273	12.6526	100
	R1213 HD (average, n=6)	46.4672	0.0148333	0.5205	0	21.2252	6.988	0.251167	21.493	0.0541667	0.000666667	97.0147		48.9211	0.795448	37.7093	12.5742	100
	%RSD	0.405006	73.2839	7.11919		1.05999	1.85921	17.8364	0.226084	71.0941	244.949			0.82691	90.7711	3.02613	5.37582	100	0.53321	82.3798	17.087	100
	BF270_#K3-20-10_1@1	64.721	0	28.895	0	0.26	0.081	0	0	0.155	0.001	94.119		0	0	76.015	23.985	100	0	51.2344	48.7656	100
	BF270_#K3-20-10_10@1	64.278	0.016	28.849	0	0.028	0.031	0	0.002	0.101	0.004	93.323		4.13546	0	45.1908	50.6738	100	0	79.0762	20.9238	100
	BF270_#K3-20-10_13@1	64.546	0.002	28.775	0	0.355	0.117	0	0.012	0.092	0	93.904		3.14475	0	72.616	24.2393	100	0	30.3765	69.6235	100
	BF270_#K3-20-10_15@1	65.329	0	28.873	0.001	0.038	0.013	0	0.007	0.152	0.003	94.436		14.9133	0	63.1915	21.8952	100	0	85.4231	14.5769	100
	BF270_#K3-20-10_2@1	66.498	0	29.123	0	0.158	0.045	0	0.002	0.116	0.005	95.952		1.243	0	76.6473	22.1097	100	0	56.6092	43.3908	100
	BF270_#K3-20-10_6@1	65.001	0	29.226	0	0.048	0.042	0.011	0.003	0.157	0	94.494		3.37175	17.202	42.1089	37.3174	100	0	76.1517	23.8483	100
	K3-20-10SPD (average, n=6)	65.0622	0.003	28.9568	0.000166667	0.147833	0.0548333	0.00183333	0.00433333	0.128833	0.00216667	94.362		2.61638	1.54018	69.6706	26.1729	100	0	58.4658	41.5342	100
	%RSD	1.21691	213.957	0.609222	244.949	91.7529	68.862	244.949	101.818	22.7912	98.6297			17.9038	59.9304	12.5933	9.57256	100
	BF270_#KT4_1@1	49.549	0	0.144	0	16.313	0.609	6.943	23.93	0.092	0	97.591		51.1271	20.6398	27.2045	1.02862	100
	BF270_#KT4_1@2	51.541	0	0.142	0	14.447	0.653	8.473	24.488	0.125	0	99.886		50.9423	24.5252	23.4586	1.07391	100
	BF270_#KT4_16@1	50.771	0.003	0.137	0	16.907	0.874	6.872	24.281	0	0.001	99.853		50.8712	20.0327	27.6484	1.44759	100
	BF270_#KT4_16@2	51.271	0	0.108	0.005	14.408	0.992	8.355	24.447	0.052	0	99.663		50.8228	24.1674	23.3795	1.63032	100
	BF270_#KT4_18@1	51.319	0.009	0.46	0	14.125	0.79	8.457	24.347	0.042	0	99.559		50.9738	24.6359	23.0828	1.30754	100	0.023259	0.135651	99.8411	100
	BF270_#KT4_18@2	50.508	0.002	0.342	0	13.901	0.863	8.63	24.132	0.08	0	98.464		50.6205	25.1881	22.7603	1.43111	100
	BF270_#KT4_25@1	51.441	0	0.177	0	14.873	0.703	8.098	24.416	0.072	0	99.78		51.0279	23.5484	24.2622	1.16149	100	0.201976	0.0701372	99.7279	100
	BF270_#KT4_25@2	50.795	0.001	0.125	0	15.692	0.622	7.685	24.423	0.01	0.004	99.382		51.0344	22.3439	25.5942	1.0275	100
	BF270_#KT4_4@1	50.203	0	0.094	0	17.999	0.989	6.024	23.984	0.098	0	99.4		50.8171	17.7592	29.767	1.65658	100
	BF270_#KT4_4@2	50.993	0	0.192	0	13.981	1.15	8.276	24.429	0.055	0	99.092		51.1429	24.1074	22.8463	1.90329	100
	KT4CPX (average, n=10)	50.8391	0.0015	0.1921	0.0005	15.2646	0.8245	7.7813	24.2877	0.0626	0.0005	99.2544		50.9378	22.7068	24.9883	1.36701	100
	%RSD	1.22324	189.215	60.9863	316.228	9.21759	22.0627	11.2985	0.832806	62.2853	253.859			2.02187	38.1664	17.4673	42.3445	100	4.90412	71.924	23.1719	100
	Session-251224
	BF274_02QL2OMP_2.1	55.42	0.043	15.531	0.004	6.479	0.021	3.851	6.207	10.214	0.008	97.787		37.3039	32.203	30.3933	0.0997745	100	5.62036	49.9632	44.4164	100
	BF274_02QL2OMP_3.1	55.074	0.054	15.008	0.023	6.684	0.023	3.835	6.667	9.811	0.005	97.185		38.6754	30.9543	30.2649	0.105478	100	3.91335	48.8093	47.2773	100
	BF274_02QL2OMP_4.1	55.005	0.042	15.521	0	6.643	0.026	3.495	5.973	10.466	0.012	97.191		37.2343	30.3144	32.3231	0.12813	100	7.96671	50.4887	41.5446	100
	BF274_02QL2OMP_5.1	55.566	0.038	15.282	0	6.711	0.011	3.823	6.193	10.318	0	97.942		36.9527	31.7395	31.2558	0.0518879	100	6.66457	49.5465	43.7889	100
	BF274_02QL2OMP_6.1	55.395	0.029	15.539	0	6.538	0.01	3.888	6.2	10.251	0	97.87		37.0794	32.3533	30.52	0.0472791	100	6.32701	49.5942	44.0787	100
	BF274_02QL2OMP_7.1	54.928	0.04	15.592	0	6.584	0.011	3.737	6.304	9.993	0.008	97.205		37.8585	31.2264	30.8628	0.0522238	100	4.64826	49.8332	45.5185	100
	BF274_02QL2OMP_9.1	55.052	0.06	14.169	0	7.334	0.038	4.476	7.489	9.87	0.012	98.504		38.4614	31.9847	29.3996	0.154281	100	11.3238	41.937	46.7392	100
	BF274_02QL2OMP_10.1	55.06	0.051	15.053	0.001	6.74	0.026	4.037	6.5	10.149	0.001	97.627		37.3595	32.2848	30.2375	0.118138	100	8.1885	47.369	44.4425	100
	BF274_02QL2OMP_11.1	55.232	0.044	15.742	0	6.506	0.01	3.55	6.219	10.088	0.008	97.424		38.2835	30.4068	31.261	0.0486653	100	3.58269	51.2275	45.1899	100
	BF274_02QL2OMP_12.1	55.652	0.014	15.421	0	6.838	0.032	3.72	5.988	10.472	0.001	98.138		36.2324	31.3191	32.2955	0.153071	100	7.50775	49.9185	42.5737	100
	BF274_02QL2OMP_12.2	55.252	0.056	15.856	0	6.765	0.023	3.502	5.892	10.225	0	97.571		36.68	30.3343	32.8725	0.113194	100	4.41512	51.478	44.1069	100
	BF274_02QL2OMP_12.3	54.995	0.024	15.27	0.003	6.803	0.017	3.864	6.079	10.339	0.003	97.41		36.2301	32.0425	31.6473	0.0800967	100	8.76299	48.5773	42.6597	100
	BF274_02QL2OMP_13.1	55.133	0.028	14.914	0.008	6.772	0.025	3.964	7.06	9.884	0.004	97.796		39.483	30.8454	29.5611	0.110528	100	6.50821	46.7537	46.7381	100
	BF274_02QL2OMP_14.1	55.228	0.026	15.275	0	6.59	0.014	3.837	6.332	10.136	0.002	97.44		37.633	31.7301	30.5712	0.0657785	100	5.87076	49.3476	44.7816	100
	BF274_02QL2OMP_14.2	55.522	0.03	15.55	0.012	6.744	0.028	3.848	6.258	10.22	0.005	98.221		37.0335	31.6843	31.1512	0.130992	100	6.16952	49.3093	44.5212	100
	BF274_02QL2OMP_15.1	54.286	0.042	15.286	0	6.877	0.028	3.687	6.247	10.004	0.005	96.466		37.2576	30.5962	32.0141	0.132017	100	7.02512	48.5384	44.4365	100
	BF274_02QL2OMP_15.2	55.315	0.034	15.427	0	6.744	0.02	3.713	6.177	10.174	0.01	97.629		37.1592	31.0788	31.6668	0.0951145	100	5.47108	49.956	44.5729	100
	BF274_02QL2OMP_17.1	55.412	0.035	15.907	0	6.599	0.008	3.14	5.727	10.187	0.008	97.032		37.5464	28.6432	33.7689	0.0414628	100	1.19689	54.1802	44.6229	100
	BF274_02QL2OMP_17.2	55.086	0.048	16.014	0.002	6.48	0.011	3.29	5.74	10.762	0.004	97.448		37.3107	29.7556	32.8772	0.0565252	100	9.06144	51.8686	39.0699	100
	BF274_02QL2OMP_21.1	54.95	0.044	15.299	0	6.594	0.025	3.734	6.269	10.035	0.005	96.955		37.6943	31.2394	30.9474	0.118835	100	4.96002	49.8256	45.2144	100
	BF274_02QL2OMP_24.1	55.107	0.037	15.299	0.017	6.787	0.024	3.728	6.255	10.052	0.01	97.336		37.324	30.9519	31.6109	0.113214	100	5.12368	49.5914	45.2849	100
	BF274_02QL2OMP_25.1	55.019	0.038	15.278	0	6.859	0.014	3.628	6.198	10.227	0.002	97.274		37.313	30.3898	32.2306	0.0666293	100	6.84983	49.4598	43.6903	100
	BF274_02QL2OMP_26.1	55.137	0.043	16.067	0	6.561	0.029	3.443	6.029	10.309	0.005	97.637		37.767	30.0093	32.0801	0.143613	100	5.46671	51.3669	43.1664	100
	BF274_02QL2OMP_28.1	55.092	0.028	15.572	0	6.509	0.027	3.652	6.313	10.03	0.006	97.244		38.2692	30.8032	30.7983	0.129391	100	4.12386	50.4238	45.4523	100
	BF274_02QL2OMP_28.2	55.729	0.034	15.93	0.001	6.513	0.015	3.504	6.099	10.364	0	98.189		37.9527	30.3388	31.6347	0.073791	100	4.63206	51.7175	43.6505	100
	BF274_02QL2OMP_29.1	55.039	0.055	14.977	0.003	6.648	0.014	4.082	6.485	10.205	0.008	97.519		37.3456	32.708	29.8827	0.0637362	100	8.83697	47.2558	43.9072	100
	BF274_02QL2OMP_30.1	56.123	0.034	15.586	0.005	6.779	0.025	3.486	6.094	10.474	0.009	98.615		37.4889	29.8386	32.551	0.121582	100	5.32148	51.3753	43.3032	100
	BF274_02QL2OMP_31.1	54.998	0.052	15.494	0.008	6.653	0.025	3.561	6.23	9.968	0.001	97.002		37.9936	30.2166	31.6693	0.120529	100	3.32452	50.7995	45.876	100
	BF274_02QL2OMP_32.1	55.641	0.032	15.698	0	6.586	0.01	3.614	6.141	10.655	0	98.385		37.6331	30.8155	31.5029	0.0484461	100	8.95697	50.0566	40.9865	100
	BF274_02QL2OMP_34.1	55.436	0.01	15.386	0	6.547	0.02	3.817	6.235	10.163	0.009	97.628		37.398	31.8556	30.6516	0.0948354	100	5.18363	49.9869	44.8295	100
	02QL2OMP (average, n=30)	55.2295	0.0381667	15.4314	0.0029	6.68223	0.0203333	3.71687	6.25333	10.2015	0.00503333	97.5813		37.5422	31.0481	31.3132	0.0965038	100	6.08934	49.6804	44.2303	100
	%RSD	0.601224	31.2074	2.47437	192.387	2.56397	38.2987	6.83109	5.52211	2.16442	75.8749			11.6734	20.0924	4.23061	64.0036	100	4.06597	3.89165	92.0424	100
	BF274_25LZY02_1.1	46.023	0	0.042	0	1.483	43.072	0.485	8.739	0	0.003	99.847		19.5846	1.51232	2.59413	76.309	100
	BF274_25LZY02_1.2	45.892	0	0.059	0	1.594	42.87	0.505	8.303	0.008	0	99.239		18.8103	1.59186	2.8187	76.7791	100
	BF274_25LZY02_1.3	45.223	0	0.012	0	1.355	43.315	0.47	8.769	0.015	0.003	99.183		19.6073	1.46223	2.36486	76.5656	100
	BF274_25LZY02_1.4	45.95	0	0.022	0	1.857	42.771	0.569	8.87	0.012	0.007	100.064		19.7446	1.76233	3.22652	75.2666	100
	BF274_25LZY02_2.1	46.622	0	0.032	0	1.572	42.82	0.485	8.897	0.058	0.006	100.507		19.926	1.51137	2.74807	75.8145	100
	BF274_25LZY02_2.2	46.413	0	0	0	1.648	42.87	0.441	9.016	0	0	100.394		20.122	1.36945	2.87086	75.6377	100
	BF274_25LZY02_2.3	46.053	0	0.016	0	1.127	43.721	0.434	8.678	0.015	0	100.051		19.403	1.35017	1.96685	77.28	100
	BF274_25LZY02_2.4	46.144	0	0	0	1.107	43.62	0.474	8.77	0	0.003	100.122		19.5858	1.47289	1.92969	77.0116	100
	BF274_25LZY02_2.5	45.79	0	0.011	0	1.398	43.284	0.381	8.562	0.015	0.004	99.452		19.2832	1.19393	2.45759	77.0653	100
	BF274_25LZY02_2.6	46.255	0	0	0	1.86	42.511	0.515	8.928	0	0.008	100.09		19.9717	1.60294	3.24766	75.1777	100
	BF274_25LZY02_3.1	46.462	0	0.024	0	1.955	42.96	0.501	8.888	0.035	0	100.831		19.7191	1.54658	3.38555	75.3487	100
	BF274_25LZY02_3.2	45.742	0	0.056	0	1.556	43.38	0.403	8.712	0.004	0.003	99.856		19.4546	1.25216	2.71214	76.5811	100
	BF274_25LZY02_3.3	45.984	0	0.093	0	2.034	43.014	0.515	8.645	0.012	0.009	100.331		19.2308	1.59401	3.53169	75.6435	100
	BF274_25LZY02_3.4	46.641	0	0.005	0	1.417	42.884	0.594	9.219	0	0.008	100.781		20.4624	1.83447	2.45494	75.2482	100
	BF274_25LZY02_3.5	46.085	0	0.015	0	1.71	43.03	0.551	8.617	0.027	0.002	100.05		19.262	1.71375	2.9836	76.0406	100
	BF274_25LZY02_3.6	46.514	0	0	0	1.357	43.259	0.722	8.976	0.1	0	100.928		19.8417	2.22067	2.34139	75.5963	100
	BF274_25LZY02_4.1	45.856	0	0	0	2.743	41.815	0.775	8.516	0	0.005	99.716		19.0123	2.40741	4.77994	73.8004	100
	BF274_25LZY02_4.2	45.642	0.005	0.028	0	2.882	42.114	0.748	8.205	0.066	0	99.702		18.3195	2.32374	5.02258	74.3342	100
	BF274_25LZY02_5.1	46.296	0.001	0.057	0	3.021	42.187	0.464	8.777	0.008	0	100.812		19.4476	1.4305	5.2248	73.8971	100
	BF274_25LZY02_5.2	45.782	0	0	0	2.866	42.161	0.417	8.706	0	0	99.964		19.4098	1.29357	4.98744	74.3091	100
	BF274_25LZY02_5.3	46.186	0	0	0	2.925	42.34	0.464	8.572	0	0	100.51		19.0605	1.43556	5.07665	74.4272	100
	BF274_25LZY02_5.4	45.425	0.005	0	0	3.206	41.501	0.519	8.439	0.12	0	99.219		18.9759	1.62379	5.62697	73.7733	100
	BF274_25LZY02_5.5	46.048	0	0.042	0	3.502	41.532	0.665	8.449	0.031	0.001	100.278		18.8003	2.05888	6.08238	73.0584	100
	BF274_25LZY02_5.6	45.814	0	0.137	0	3.603	41.255	0.691	8.503	0	0.009	100.05		18.9415	2.14176	6.26477	72.6519	100
	BF274_25LZY02_6.1	46.274	0	0	0	3.224	41.484	0.532	9.13	0.012	0	100.685		20.2073	1.63832	5.56968	72.5847	100
	BF274_25LZY02_6.2	46.463	0	0	0	3.243	41.642	0.555	8.955	0.039	0	100.91		19.8214	1.70927	5.60291	72.8665	100
	BF274_25LZY02_6.3	46.559	0	0.023	0	3.302	41.236	0.531	8.807	0	0.011	100.486		19.6927	1.65205	5.76305	72.8922	100
	BF274_25LZY02_6.4	46.287	0	0.017	0	3.283	41.232	0.517	9.184	0.05	0	100.611		20.3809	1.59637	5.68671	72.336	100
	BF274_25LZY02_6.5	46.25	0	0.007	0	3.187	41.701	0.604	8.388	0	0.005	100.153		18.7724	1.88083	5.56726	73.7795	100
	BF274_25LZY02_6.6	46.112	0.006	0	0	3.138	41.722	0.48	8.719	0.054	0.003	100.234		19.4536	1.49013	5.46493	73.5913	100
	25LZY02RDN (average, n=30)	46.0929	0.000566667	0.0232667	0	2.30517	42.4434	0.533567	8.7313	0.0227	0.003	100.156		19.478	1.65617	4.01389	74.852	100
	%RSD	0.749136	288.237	136.097		36.6577	1.83124	18.8315	2.88013	136.307	114.47			4.86978	44.3029	48.3795	2.44778	100	10.3224	78.6638	11.0139	100
	BF274_Cu-TRI-1_1.1	65.238	0	27.057	0.003	0.255	0.124	0	0	0.184	0	92.878		0	0	67.0014	32.9986	100	0	52.8494	47.1506	100
	BF274_Cu-TRI-1_1.2	64.578	0	26.864	0	0.248	0.122	0	0	0.226	0.01	92.048		0	0	66.745	33.255	100	0	58.5089	41.4911	100
	BF274_Cu-TRI-1_1.3	63.94	0	26.712	0.01	0.22	0.119	0.018	0	0.079	0.005	91.124		0	8.6113	59.0427	32.346	100	0	32.9553	67.0447	100
	BF274_Cu-TRI-1_1.4	65.047	0	27.226	0	0.271	0.131	0	0	0.165	0.006	92.873		0	0	67.1326	32.8674	100	0	48.6556	51.3444	100
	BF274_Cu-TRI-1_1.5	64.535	0	26.57	0.002	0.271	0.139	0	0	0.204	0.005	91.729		0	0	65.8117	34.1883	100	0	53.4572	46.5428	100
	BF274_Cu-TRI-1_1.6	63.931	0	26.625	0	0.213	0.12	0.009	0	0.103	0	91.007		0	4.57622	60.7563	34.6675	100	0	40.5167	59.4833	100
	BF274_Cu-TRI-1_1.7	64.672	0	27.114	0	0.263	0.142	0.01	0.001	0.181	0.003	92.405		0.300792	4.18521	61.7477	33.7663	100	0	49.6278	50.3722	100
	BF274_Cu-TRI-1_1.8	63.661	0.012	26.867	0	0.267	0.142	0.001	0	0.083	0.003	91.038		0	0.432037	64.7112	34.8567	100	0	31.8047	68.1953	100
	BF274_Cu-TRI-1_1.9	64.438	0.003	26.926	0.007	0.281	0.142	0	0	0.157	0.008	91.977		0	0	66.1457	33.8543	100	0	46.1443	53.8557	100
	BF274_Cu-TRI-1_1.10	64.073	0	27.05	0	0.263	0.141	0	0	0.169	0.012	91.708		0	0	64.8092	35.1908	100	0	49.1227	50.8773	100
	BF274_Cu-TRI-1_2.1	65.313	0.006	27.048	0	0.253	0.146	0.018	0.004	0.201	0.007	93.008		1.16979	7.32436	57.7517	33.7541	100	0	51.544	48.456	100
	BF274_Cu-TRI-1_2.2	64.803	0	26.902	0	0.252	0.162	0	0	0.125	0.004	92.248		0	0	60.5659	39.4341	100	0	41.0555	58.9445	100
	BF274_Cu-TRI-1_2.3	65.136	0.005	27.211	0	0.231	0.157	0.008	0	0.195	0.001	92.944		0	3.52751	57.1397	39.3328	100	0	52.7919	47.2081	100
	BF274_Cu-TRI-1_2.4	64.14	0	26.854	0	0.282	0.159	0.013	0	0.103	0.006	91.557		0	4.97065	60.4876	34.5417	100	0	33.8715	66.1285	100
	BF274_Cu-TRI-1_2.5	64.462	0	27.104	0	0.251	0.137	0.011	0	0.141	0.006	92.117		0	4.79	61.3146	33.8954	100	0	44.3995	55.6005	100
	BF274_Cu-TRI-1_2.6	64.815	0	27.041	0.002	0.274	0.149	0	0	0.224	0	92.505		0	0	64.4843	35.5157	100	0	54.9996	45.0004	100
	BF274_Cu-TRI-1_2.7	64.548	0	27.161	0	0.266	0.146	0.008	0.003	0.183	0.005	92.332		0.889742	3.30129	61.5776	34.2313	100	0	49.55	50.45	100
	BF274_Cu-TRI-1_2.8	65.551	0	27.369	0	0.204	0.159	0.029	0	0.134	0.005	93.451		0	12.4049	48.9522	38.6429	100	0	42.7093	57.2907	100
	BF274_Cu-TRI-1_2.9	64.944	0	27.192	0	0.286	0.159	0.001	0	0.197	0.004	92.793		0	0.397174	63.7226	35.8802	100	0	50.4366	49.5634	100
	BF274_Cu-TRI-1_2.10	66.31	0	27.371	0.005	0.239	0.15	0	0	0.134	0.004	94.227		0	0	61.1375	38.8625	100	0	44.2805	55.7195	100
	BF274_Cu-TRI-1_3.1	64.509	0	26.947	0	0.247	0.17	0	0.008	0.105	0.004	91.995		2.38672	0	57.5184	40.0949	100	0	36.1789	63.8211	100
	BF274_Cu-TRI-1_3.2	64.846	0	27.006	0.003	0.259	0.173	0	0.006	0.153	0.004	92.451		1.7395	0	58.61	39.6505	100	0	44.5277	55.4723	100
	BF274_Cu-TRI-1_3.3	64.294	0	26.83	0	0.229	0.154	0	0.001	0.116	0.002	91.643		0.331687	0	59.2873	40.381	100	0	41.047	58.953	100
	BF274_Cu-TRI-1_3.4	64.601	0	26.871	0.001	0.262	0.167	0.001	0	0.162	0	92.065		0	0.411758	60.5189	39.0693	100	0	46.454	53.546	100
	BF274_Cu-TRI-1_3.5	64.449	0.003	27.143	0	0.231	0.171	0	0.006	0.167	0	92.181		1.86631	0	56.0845	42.0491	100	0	48.4542	51.5458	100
	BF274_Cu-TRI-1_3.6	64.512	0	26.913	0	0.235	0.165	0	0	0.153	0.006	92.009		0	0	58.4411	41.5589	100	0	46.8687	53.1313	100
	BF274_Cu-TRI-1_3.7	64.408	0	27.053	0	0.212	0.162	0	0.003	0.186	0.005	92.031		1.01165	0	55.8013	43.187	100	0	53.1625	46.8375	100
	BF274_Cu-TRI-1_3.8	64.739	0	26.935	0	0.274	0.152	0	0	0.194	0.01	92.304		0	0	64.0265	35.9735	100	0	51.2432	48.7568	100
	BF274_Cu-TRI-1_3.9	64.751	0	26.677	0	0.245	0.145	0	0.006	0.167	0.007	92.001		1.92392	0	61.3198	36.7563	100	0	49.2138	50.7862	100
	BF274_Cu-TRI-1_3.10	64.24	0	26.811	0	0.259	0.162	0	0	0.188	0.001	91.668		0	0	61.2183	38.7817	100	0	50.7443	49.2557	100
	CU-TRI-1SPD (average, n=30)	64.6495	0.000966667	26.9817	0.0011	0.251433	0.1489	0.00423333	0.00126667	0.1593	0.00443333	92.2028		0.394447	1.83425	61.115	36.6563	100	0	47.3046	52.6954	100
	%RSD	0.816323	268.228	0.741303	216.648	8.69398	10.3553	172.884	185.361	25.0047	71.2516			42.043	54.561	1.53919	1.85681	100	1.41569	8.02409	90.5602	100
	BF274_K3-20-10_2.1	65.246	0.004	27.344	0	0.011	0.026	0.014	0.007	0.089	0.006	92.747		12.5854	35.0227	15.437	36.9549	100	0	74.3305	25.6695	100
	BF274_K3-20-10_5.1	65.305	0	27.266	0	0.007	0.01	0.003	0.003	0.152	0	92.746		14.6032	20.3188	26.5964	38.4817	100	0	93.0504	6.9496	100
	BF274_K3-20-10_7.1	64.049	0	26.868	0.004	0.014	0.008	0	0.003	0.061	0.005	91.019		14.8133	0	53.9583	31.2284	100	0	84.4978	15.5022	100
	BF274_K3-20-10_8.1	65.036	0	27.707	0.009	0	0.022	0	0	0.138	0.008	92.923		0	0	0	100	100	0	93.4891	6.51093	100
	BF274_K3-20-10_12.1	65.251	0	27.647	0	0.021	0.012	0	0.002	0.086	0.003	93.022		7.17411	0	58.797	34.0288	100	0	84.8081	15.1919	100
	BF274_K3-20-10_15.1	64.683	0.004	27.041	0.005	0.159	0.038	0	0.004	0.118	0.001	92.055		2.52928	0	78.4753	18.9954	100	0	57.451	42.549	100
	BF274_K3-20-10_15.2	65.027	0.004	27.407	0	0.145	0.061	0.015	0	0.138	0.015	92.82		0	11.4503	62.093	26.4566	100	0	57.8073	42.1927	100
	BF274_K3-20-10_18.1	64.923	0	27.369	0	0.208	0.063	0	0	0.197	0.009	92.774		0	0	76.5248	23.4752	100	0	62.6912	37.3088	100
	BF274_K3-20-10_21.1	68.138	0.004	24.164	0	0.029	0.021	0.014	0	0.109	0.002	92.481		0	33.1754	38.5508	28.2738	100	0	77.0607	22.9393	100
	BF274_K3-20-10_23.1	65.354	0	27.655	0	0.029	0.045	0.004	0	0.17	0.006	93.263		0	8.72676	35.4927	55.7806	100	0	82.8288	17.1712	100
	BF274_K3-20-10_23.2	65.064	0	27.773	0	0	0.039	0	0.005	0.128	0.007	93.037		13.9543	0	0	86.0457	100	0	86.6033	13.3967	100
	BF274_K3-20-10_27.1	65.358	0	27.534	0	0.009	0.034	0	0.004	0.118	0.005	93.081		10.5531	0	18.5337	70.9132	100	0	84.9254	15.0746	100
	BF274_K3-20-10_29.1	64.965	0	27.112	0	0.003	0.045	0	0	0.093	0.008	92.231		0	0	6.17581	93.8242	100	0	81.6129	18.3871	100
	BF274_K3-20-10_30.1	64.838	0	27.453	0	0.159	0.032	0	0	0.089	0.011	92.598		0	0	83.0677	16.9323	100	0	51.8767	48.1233	100
	BF274_K3-20-10_31.1	65.302	0.004	27.463	0	0.039	0.033	0	0.001	0.14	0.006	92.997		1.73824	0	52.9143	45.3474	100	0	81.4945	18.5055	100
	BF274_K3-20-10_32.1	65.228	0.004	27.287	0	0.021	0.021	0.003	0.002	0.039	0.006	92.611		5.10632	10.6574	41.85	42.3863	100	0	64.31	35.69	100
	BF274_K3-20-10_33.1	65.371	0	27.534	0	0.04	0.029	0	0.007	0.093	0	93.081		11.4477	0	51.0597	37.4926	100	0	73.3495	26.6505	100
	BF274_K3-20-10_34.1	65.198	0	27.597	0	0.025	0.031	0.009	0	0.093	0.011	92.97		0	22.1469	34.511	43.3421	100	0	74.8516	25.1484	100
	BF274_K3-20-10_35.1	64.951	0	27.724	0	0.021	0.019	0.002	0.003	0.17	0.001	92.899		8.06567	7.4817	44.0694	40.3832	100	0	89.2137	10.7863	100
	K3-20-10SPD (average, n=19)	65.2256	0.00126316	27.2603	0.000947368	0.0494737	0.031	0.00336842	0.00215789	0.116895	0.00578947	92.6968		3.08411	6.69849	55.1915	35.0259	100	0	75.1449	24.8551	100
	%RSD	1.18297	151.23	2.89057	254.877	130.953	49.439	159.63	110.599	33.9311	70.1808			23.3328	46.8578	21.564	8.24544	100
	BF274_NIJ-JD_1.1	56.664	0	25.304	0	0.102	0.017	0.039	0.022	14.602	0.008	96.768		12.9932	32.0486	47.021	7.93725	100	0.300279	99.3614	0.338328	100
	BF274_NIJ-JD_1.2	57.479	0.009	25.637	0	0.186	0.032	0	0.034	15.025	0.015	98.417		16.6276	0	71.0007	12.3717	100	0.532797	99.2496	0.217614	100
	BF274_NIJ-JD_1.3	57.313	0	25.17	0	0.209	0.049	0.014	0.081	14.744	0	97.58		26.7901	6.44271	53.9553	12.8119	100	0.608247	98.8727	0.51907	100
	BF274_NIJ-JD_2.1	56.647	0.01	25.111	0	0.073	0.007	0	0.059	14.503	0.008	96.438		48.5542	0	46.8917	4.55408	100	0	99.5391	0.460863	100
	BF274_NIJ-JD_2.3	56.608	0	25.511	0	0.007	0.01	0.01	0.113	14.153	0.002	96.417		80.5513	9.91848	3.89485	5.63537	100	0	99.4553	0.544748	100
	BF274_NIJ-JD_3.1	56.92	0.028	25.418	0	0.08	0.004	0.028	0.034	14.244	0.01	96.767		24.5372	28.1161	45.0645	2.2821	100	0	99.4653	0.534692	100
	BF274_NIJ-JD_3.2	57.82	0	25.502	0	0.073	0.014	0	0.017	14.777	0	98.203		19.9888	0	66.9977	13.0135	100	0	99.683	0.317035	100
	BF274_NIJ-JD_3.3	57.122	0.009	25.514	0.002	0.026	0.033	0	0.066	14.5	0	97.283		58.7281	0	18.0582	23.2137	100	0	99.5735	0.426466	100
	BF274_NIJ-JD_4.1	57.06	0	25.507	0	0.046	0.008	0	0.095	14.221	0.003	96.958		69.2271	0	26.1643	4.60862	100	0	99.4696	0.530418	100
	NIJ-JD (average, n=9)	57.0703	0.00622222	25.4082	0.000222222	0.0891111	0.0193333	0.0101111	0.0578889	14.5299	0.00511111	97.1964		36.9197	8.97249	44.3602	9.74761	100	0	99.4072	0.592793	100
	%RSD	0.725467	150.072	0.693923	300	76.4338	78.9535	143.359	58.3154	2.00366	105.109			15.3517	52.5111	15.7057	16.4314	100
	BF274_QJH01-1_2.1	52.554	0.077	5.655	0	11.557	0.017	8.011	14.877	5.235	0	98.013		42.4358	31.7947	25.7312	0.0383349	100	12.3624	11.5413	76.0964	100
	BF274_QJH01-1_3.1	52.366	0.07	5.184	0	10.865	0.018	8.901	15.866	4.82	0.015	98.11		43.1779	33.7042	23.0793	0.0387253	100	13.1988	8.51675	78.2844	100
	BF274_QJH01-1_4.1	52.084	0.092	5.361	0.011	10.621	0.018	8.836	15.899	5.051	0.005	97.994		43.5615	33.6853	22.7142	0.0389883	100	15.4679	7.65804	76.8741	100
	BF274_QJH01-1_7.1	52.544	0.095	5.76	0.007	11.555	0.009	8.105	14.735	5.541	0.003	98.354		42.0536	32.1853	25.7408	0.020306	100	15.3341	10.3278	74.3381	100
	BF274_QJH01-1_7.2	52.618	0.053	5.613	0.002	11.257	0.017	8.509	15.199	5.259	0	98.537		42.4098	33.0355	24.5173	0.0374997	100	14.4435	9.56999	75.9865	100
	BF274_QJH01-1_10.1	52.597	0.088	7.291	0.012	10.02	0.007	7.858	14.141	5.808	0.012	97.844		42.9802	33.2316	23.7714	0.0168196	100	12.4242	14.7947	72.7811	100
	BF274_QJH01-1_11.1	52.259	0.066	5.817	0	11.542	0.038	7.794	14.665	5.528	0.022	97.748		42.4474	31.3892	26.0764	0.0869522	100	14.9261	10.879	74.1949	100
	BF274_QJH01-1_12.1	52.288	0.055	5.493	0.009	10.626	0.02	8.517	15.7	4.733	0.014	97.474		43.7809	33.0463	23.1288	0.0440903	100	10.3927	10.8904	78.7169	100
	BF274_QJH01-1_13.1	51.926	0.075	5.617	0	10.684	0.011	8.92	15.666	4.876	0.002	97.794		43.0086	34.0732	22.8944	0.0238736	100	14.009	8.22323	77.7678	100
	BF274_QJH01-1_14.1	52.654	0.088	6.096	0.007	10.545	0.04	8.258	15.192	5.251	0	98.154		43.4745	32.881	23.554	0.0904915	100	11.9465	11.9866	76.0669	100
	QJH01-1OMP (average, n=10)	52.389	0.0759	5.7887	0.0048	10.9272	0.0195	8.3709	15.194	5.2102	0.0073	97.9875		42.9381	32.915	24.1034	0.0435646	100	13.4414	10.4256	76.133	100
	%RSD	0.472812	19.7037	10.0849	102.439	4.81757	57.1692	5.1121	3.87963	6.67775	107.486			6.47166	11.8652	6.27267	75.3904	100	5.50788	12.1923	82.2998	100
	Average calculated from mutiple sessions
	Opx
	06JY31OPX	55.9764	0.08234	3.3866	0.5182	6.1634	0.13021	33.2695	0.81233	0.07927	0.00063	100.419		1.56166	88.9919	9.24852	0.197891	100
	06JY34OPX	56.369	0.079285	2.96745	0.54329	5.2687	0.128115	34.0799	0.69338	0.12483	0.001515	100.256		1.32512	90.622	7.85933	0.193558	100
	97M43OPX	49.9187	0.124148	5.14891	0.235396	21.7662	0.216426	20.9311	0.0546304	0.00761739	0.00480435	98.408		0.117894	62.8491	36.6638	0.369227	100
	97M44OPX	50.1797	0.0959516	5.64277	0.204706	20.408	0.13918	21.8811	0.0553172	0.00694688	0.00386719	98.6175		0.118859	65.4174	34.2273	0.236416	100
	MB04-8OPX	49.7562	0.0504737	0.930166	0.00616842	30.6371	0.864026	15.3947	0.618082	0.0133105	0.000852632	98.2711		1.32536	45.9316	51.2784	1.46468	100
	MB05-2OPX	50.5537	0.0813333	1.21283	0.0393889	28.6028	0.585111	17.0083	0.590611	0.0126111	0.000611111	98.6873		1.25544	50.3043	47.457	0.983239	100
	NRM-EN2	56.8518	0.0128847	1.00022	0.473114	7.68914	0.175932	33.1329	0.467046	0.00467458	0.00200678	99.8097		0.886086	87.4635	11.3866	0.26387	100
	Cpx1
	06JY31CPX	52.7945	0.284004	4.62842	1.1124	2.88063	0.0813167	16.4143	20.3135	1.1002	0.00497083	99.6143		44.6794	50.2338	4.94546	0.141393	100	0	4.19537	95.8046	100
	13NQ124CPX	55.7367	0.03545	1.61942	0.3075	2.08667	0.0310167	16.5183	23.0817	0.913917	0.00233333	100.333		48.3705	48.1649	3.41322	0.051385	100	0	3.34975	96.6503	100
	1594CPX	50.5946	0.0902032	1.74835	0.00281935	15.9939	0.721471	7.80035	21.3369	1.42758	0.00139032	99.7176		47.159	23.9882	27.5921	1.26061	100
	1984HD	48.2635	0.0198971	0.409543	0.00422	24.224	3.08063	1.08542	22.3309	0.204597	0.000562857	99.6232		49.4217	3.34241	41.846	5.38987	100
	22779HD (A & BC)	47.9228	0.00505417	0.525052	0.00118958	20.6449	7.43212	0.801019	21.9204	0.0252854	0.000610417	99.2785		48.6854	2.47538	35.7899	13.0494	100
	24516HD	48.1859	0.00335	0.213442	0.00297778	21.8675	6.27814	0.324306	22.5284	0.026775	0.00112778	99.4319		50.0505	1.0025	37.9205	11.0265	100
	25LZY02RDN	46.0929	0.000566667	0.0232667	0	2.30517	42.4434	0.533567	8.7313	0.0227	0.003	100.156		19.478	1.65617	4.01389	74.852	100
	2C42CPX	54.429	0.0967148	1.57805	1.04996	2.00407	0.0535741	16.7698	22.739	0.801807	0.00164444	99.5236		47.6919	48.9385	3.28083	0.088829	100	0	2.95333	97.0467	100
	2C47-2CPX	55.1667	0.0795333	1.44162	0.904617	2.65167	0.0530833	16.24	22.6933	0.937633	0.00128333	100.169		47.8749	47.6701	4.36643	0.0885311	100	0	3.45587	96.5441	100
	37087HD	49.6831	0.0628595	0.541343	0.00470811	20.8777	1.19938	4.48386	22.9304	0.123754	0.00214324	99.9093		49.4047	13.4419	35.1105	2.04288	100
	95AK24 (or UWC3CPX) Diopside	53.4918	0.0880846	1.1316	0.00320769	4.28596	0.211021	15.4318	24.6083	0.116765	0.00159231	99.3702		49.6213	43.2966	6.74579	0.336388	100	0.0611624	0.363368	99.5755	100
	97SL67CPX	55.2533	0.0521667	1.30767	0.0858333	1.85	0.01445	16.7567	24.61	0.519367	0.00686667	100.456		49.8374	47.2152	2.92424	0.0231334	100	0	1.86775	98.1323	100
	KT4CPX	50.8391	0.0015	0.1921	0.0005	15.2646	0.8245	7.7813	24.2877	0.0626	0.0005	99.2544		50.9378	22.7068	24.9883	1.36701	100
	MB04-8CPX	50.4743	0.243148	2.39538	0.024464	13.6023	0.4277	10.9736	20.8111	0.389464	0.001576	99.3431		44.2459	32.4623	22.5729	0.718862	100
	MB05-2CPX	51.0525	0.354353	2.50694	0.0659412	11.5126	0.247647	11.8994	21.6295	0.460059	0.000823529	99.7299		45.6625	34.9534	18.9708	0.413308	100
	NRM-AG1	50.2649	0.955708	3.61704	0.0385431	8.42745	0.20641	14.0444	21.4784	0.330335	0.00257647	99.3658		44.9707	40.9149	13.7728	0.341653	100
	R1213	47.8096	0.0190972	0.483314	0.00140556	21.5165	7.56969	0.264714	21.5981	0.0457528	0.000691667	99.3089		48.269	0.823153	37.5339	13.3739	100
	CPX2
	02QL2OMP	55.2295	0.0381667	15.4314	0.0029	6.68223	0.0203333	3.71687	6.25333	10.2015	0.00503333	97.5813		37.5422	31.0481	31.3132	0.0965038	100	6.08934	49.6804	44.2303	100	imprecise?
	06JY29CPX	53.4451	0.1884	4.62356	1.20182	2.551	0.0821778	16.2922	20.4961	1.33581	0.000333333	100.217		45.3241	50.129	4.40318	0.143662	100	0.0874972	4.99124	94.9213	100
	944010-2OMP	56.6233	0.0405333	8.295	0.0181333	2.67833	0.0140833	10.8567	16.685	5.01167	0.00525	100.228		49.229	44.57	6.16819	0.0328495	100	0	21.11	78.89	100
	95HN24-2OMP	56.305	0.126567	10.945	0.0847667	4.37167	0.0405	8.34667	13.695	6.42167	0.00296667	100.34		47.6301	40.3909	11.8677	0.111353	100	0	28.7832	71.2168	100
	95HN68OMP	56.2417	0.1008	10.9283	0.0991333	4.595	0.0185833	8.06833	13.4783	6.56333	0.00293333	100.096		47.6167	39.6605	12.6709	0.0519009	100	0	29.5577	70.4423	100
	97SL17OMP	56.225	0.0655269	12.497	0.0186462	4.32004	0.0159192	7.30481	11.7263	7.55262	0.00111538	99.7269		46.3953	40.2136	13.3413	0.0497924	100	0.228979	34.9481	64.8229	100
	97SL21OMP	55.6582	0.0930522	12.025	0.0118043	4.63535	0.018913	7.60991	12.5728	7.07348	0.00247826	99.701		46.9235	39.5175	13.5033	0.0558018	100	0.987615	31.6602	67.3522	100
	97SL54CPX	55.671	0.0297143	5.59243	0.013	3.5435	0.0834286	12.1956	19.5259	3.3055	0.00357143	99.9636		49.6507	43.1486	7.03306	0.167709	100	0	13.2023	86.7977	100	Fu et al. (2003)31
	97SL61CPX	54.9583	0.0390167	1.10705	0.0265833	1.62167	0.00746667	16.8733	24.8567	0.5571	0.0018	100.049		50.1083	47.3281	2.55168	0.0118993	100	0.604127	1.39973	97.9961	100
	97SL62CPX	54.86	0.0291333	0.9849	0.0384833	2.03	0.0225167	16.65	24.6217	0.620867	0.000483333	99.8581		49.8508	46.9051	3.20811	0.0360402	100	0.828718	1.41391	97.7574	100
	97SL65CPX Diopside	54.9245	0.0353407	1.106	0.0276327	1.64981	0.00772301	17.0498	24.5291	0.556836	0.0017469	99.8884		49.5078	47.8808	2.5991	0.0123227	100	0.5511	1.45315	97.9958	100
	CPX2501	54.9867	0.105867	2.65833	1.4574	1.50833	0.0460833	15.6033	21.5617	1.805	0.00203333	99.7347		48.4686	48.803	2.64651	0.0818936	100	0	6.84026	93.1597	100
	GQ01-8OMP	55.0823	0.0342875	6.78379	0.0102625	8.2315	0.0117417	8.5305	14.1898	6.08158	0.00299167	98.9587		43.6697	36.5283	19.7734	0.0285668	100	7.6109	19.6151	72.774	100
	NIJ-JD	58.9637	0.0125262	25.3927	0.0022619	0.0704857	0.0127452	0.00812619	0.0689619	14.9196	0.00381667	99.4549							0	99.4645	0.535516	100
	NSH4CPX	50.2433	1.06842	8.77667	0.00485	7.27	0.13185	13.7467	17.0467	1.725	0.00553333	100.019		40.6332	45.5922	13.5262	0.248456	100	1.26859	5.74476	92.9866	100
	NSH5CPX	51.035	0.80225	8.39	0.01015	6.73333	0.12405	14.9583	16.4833	1.53333	0.0063	100.076		38.6479	48.7994	12.3228	0.229935	100	0.0401113	6.07081	93.8891	100
	NSH6CPX	49.8842	0.930258	8.837	0.00735263	6.66784	0.132074	14.4949	16.8014	1.58474	0.00717368	99.347		39.7398	47.7031	12.3101	0.246958	100	1.84792	4.62165	93.5304	100
	NSH7CPX	49.25	1.50977	9.41667	0.00586667	8.21833	0.12925	11.9167	17.4617	2.04833	0.00785	99.9644		43.052	40.8803	15.8158	0.251922	100	2.22773	6.33253	91.4397	100
	NSH9CPX	50.0451	0.884315	8.81295	0.00386	6.637	0.129625	14.7854	16.3972	1.55055	0.006915	99.253		38.8077	48.689	12.2608	0.242529	100	1.23748	5.06686	93.6957	100
	P260OMP	56.2217	0.0455333	9.335	0.0763833	4.70333	0.00913333	8.87333	14.0233	6.38667	0.00155	99.6759		46.6697	41.0886	12.2177	0.0240293	100	1.6132	26.6137	71.7731	100
	QJH01-1OMP	53.3588	0.0821429	5.84371	0.00647381	10.4075	0.0130571	8.35969	15.1745	5.22821	0.00327381	98.4774		43.4302	33.2903	23.25	0.0295429	100	9.92864	13.4952	76.5761	100
	QLP08-1OMP	55.7751	0.0354809	9.05196	0.016217	5.81989	0.0138277	8.61617	13.4062	6.62351	0.00289362	99.3612		44.7644	40.0306	15.1684	0.036501	100	4.60246	25.296	70.1015	100
	TP03-2OMP	56.0783	0.0284667	9.13167	0.0152833	9.19167	0.0100833	6.56	10.22	8.08333	0.00141667	99.3202		38.5224	34.4046	27.043	0.0300465	100	9.08748	29.683	61.2295	100
	XHD07-1OMP	56.2317	0.109583	11.0083	0.0636667	4.32	0.0208333	8.24167	13.4983	6.575	0.00203333	100.071		47.6061	40.4435	11.8923	0.0580858	100	0	29.5592	70.4408	100
	XHD23-1OMP	56.485	0.0355667	10.145	0.00325	7.47167	0.00696667	6.64833	10.8683	8.045	0.00278333	99.7119		41.8717	35.6386	22.4685	0.0212183	100	6.11539	32.0158	61.8688	100
	SPD
	CU-TRI-1SPD	64.6495	0.000966667	26.9817	0.0011	0.251433	0.1489	0.00423333	0.00126667	0.1593	0.00443333	92.2028											no Li2O data
	K3-20-10SPD	65.5714	0.00131111	28.0605	0.000711111	0.0651778	0.0380222	0.00304444	0.00355556	0.111644	0.00431111	93.8596											no Li2O data

## Sheet: Table S2
	Table S2. SIMS pyroxene data, analysed by SHRIMP SI and CAMECA IMS-1280
	CPS: counts per second; P-Std: primary standard, 97M44OPX orthopyroxene or 97SL65CPX diopside.
	(Mount_) Sample_Grain.Analysis	16O (CPS)	56Fe16O/16O	Raw 18O/16O Ratio	±2s	d18O (‰, VSMOW) (vs. P-Std)	IMF (‰)	d18O (‰, VSMOW) LF or ME corr	±2s (internal)	±2s (external)	Comments
	SHRIMP SI
	Session-180616
	BF063
1	97SL65CPX Di (average, n=11)	2.1255e+09		0.00203046	7.05666e-07	4.87	-7.01661e-14	4.87		0.351918
	97SL65_Di1.1	2.14738e+09		0.00203027	1.56e-07	4.77655			0.0777977	0.360415
	97SL65_Di2.1	2.14178e+09		0.00203102	5.04e-07	5.14971			0.251346	0.43246
	97SL65_Di3.1	2.12381e+09		0.00203001	1.8e-07	4.64887			0.0897666	0.363186
	97SL65_Di4.1	2.12695e+09		0.00203022	3.78e-07	4.75181			0.18851	0.399227
	97SL65_Di5.1	2.12104e+09		0.00203045	1.07e-07	4.86613			0.0533613	0.355941
	97SL65_Di6.1	2.1223e+09		0.00203054	2.29e-07	4.91265			0.114203	0.369985
	97SL65_Di7.1	2.10348e+09		0.00203104	2.53e-07	5.16159			0.126172	0.373852
	97SL65_Di8.1	2.13252e+09		0.00203002	4.6e-07	4.6553			0.229404	0.420086
	97SL65_Di9.1	2.12177e+09		0.0020303	2.42e-07	4.79437			0.120686	0.372037
	97SL65_Di10.1	2.13133e+09		0.00203071	3.68e-07	4.99728			0.183523	0.396897
	97SL65_Di11.1	2.10809e+09		0.00203043	2.94e-07	4.85574			0.146619	0.381239
1	95AK24 (or UWC3) Di (average, n=39)	2.12907e+09		0.0020432	8.33161e-07	11.1758	0.995823	10.18		0.4155
	UWC3_Di1.1	2.05865e+09		0.00204351	3.13e-07	11.3285			0.156094	0.384983
	UWC3_Di2.1	2.049e+09		0.00204336	2.02e-07	11.2577			0.100738	0.366053
	UWC3_Di3.1	2.05921e+09		0.00204244	5.2e-07	10.8019			0.259326	0.437145
	UWC3_Di4.1	2.0632e+09		0.00204356	3.58e-07	11.3552			0.178536	0.394615
	UWC3_Di5.1	2.08918e+09		0.00204345	2.38e-07	11.3003			0.118691	0.371395
	UWC3_Di6.1	2.09742e+09		0.00204365	2.91e-07	11.4018			0.145123	0.380666
	UWC3_Di7.1	2.11694e+09		0.00204286	2.54e-07	11.0078			0.126671	0.374021
	UWC3_Di1.2	2.09834e+09		0.00204399	8.55e-07	11.5671			0.426391	0.552862	large error
	UWC3_Di2.2	2.11285e+09		0.00204386	6.06e-07	11.5037			0.302214	0.463875
	UWC3_Di3.2	2.1289e+09		0.0020432	3.85e-07	11.1781			0.192001	0.400887
	UWC3_Di4.2	2.1258e+09		0.00204308	2.65e-07	11.1197			0.132156	0.375914
	UWC3_Di5.2	2.11239e+09		0.00204348	2.2e-07	11.3152			0.109715	0.368624
	UWC3_Di6.2	2.13392e+09		0.0020425	9.49e-07	10.8307			0.473269	0.589771	large error
	UWC3_Di7.2	2.14153e+09		0.00204272	1.65e-07	10.9371			0.0822861	0.36141
	UWC3_Di2.3	2.12796e+09		0.00204343	6.7e-08	11.2914			0.0334131	0.353501
	UWC3_Di3.3	2.14686e+09		0.00204264	4.97e-07	10.8989			0.247856	0.43044
	UWC3_Di4.3	2.1368e+09		0.002043	3.03e-07	11.0801			0.151107	0.382988
	UWC3_Di5.3	2.13423e+09		0.00204255	5.47e-07	10.8529			0.272791	0.445265
	UWC3_Di6.3	2.14296e+09		0.00204287	4.77e-07	11.0138			0.237882	0.424775
	UWC3_Di7.3	2.14141e+09		0.00204397	3.34e-07	11.5582			0.166567	0.389347
	UWC3_Di2.4	2.13256e+09		0.00204307	1.83e-07	11.1108			0.0912627	0.363559
	UWC3_Di3.4	2.1377e+09		0.0020428	2.08e-07	10.9806			0.10373	0.366887
	UWC3_Di4.4	2.17639e+09		0.00204352	4.03e-07	11.3369			0.200977	0.405263
	UWC3_Di5.4	2.16489e+09		0.00204318	3.65e-07	11.1687			0.182027	0.396207
	UWC3_Di6.4	2.18242e+09		0.00204248	2.61e-07	10.8203			0.130162	0.375218
	UWC3_Di7.4	2.16595e+09		0.00204303	3.11e-07	11.0929			0.155097	0.384579
	UWC3_Di2.5	2.16844e+09		0.00204279	4.34e-07	10.9757			0.216437	0.413148
	UWC3_Di4.5	2.1657e+09		0.00204302	1.86e-07	11.089			0.0927588	0.363938
	UWC3_Di5.5	2.15548e+09		0.00204332	1.36e-07	11.2389			0.0678237	0.358394
	UWC3_Di6.5	2.166e+09		0.00204314	7.36e-07	11.1454			0.367046	0.508497
	UWC3_Di7.5	2.15667e+09		0.00204324	5.01e-07	11.1969			0.24985	0.431592
	UWC3_Di2.6	2.14575e+09		0.00204359	1.85e-07	11.3696			0.0922601	0.363811
	UWC3_Di4.6	2.16173e+09		0.00204303	2.57e-07	11.0929			0.128167	0.37453
	UWC3_Di5.6	2.15575e+09		0.00204359	2.15e-07	11.3681			0.107221	0.36789
	UWC3_Di6.6	2.14052e+09		0.0020433	1.82e-07	11.2285			0.090764	0.363434
	UWC3_Di7.6	2.12855e+09		0.00204325	2.39e-07	11.2008			0.11919	0.371554
	UWC3_Di2.7	2.13787e+09		0.00204362	2.97e-07	11.3869			0.148115	0.381817
	UWC3_Di4.7	2.10259e+09		0.00204286	2.55e-07	11.0103			0.127169	0.37419
	UWC3_Di5.7	2.07138e+09		0.00204374	4.57e-07	11.4438			0.227907	0.419271
1	97SL17OMP (average, n=11)	2.10518e+09		0.00202104	1.03863e-06	0.210798	-2.0892	2.3		0.514015
	97SL17_Omp1.1	2.11679e+09		0.00202173	3.77e-07	0.550614			0.188011	0.398992
	97SL17_Omp2.1	2.12108e+09		0.00202161	3.15e-07	0.494195			0.157092	0.385388
	97SL17_Omp3.1	2.11604e+09		0.00202077	4.07e-07	0.0755111			0.202972	0.406256
	97SL17_Omp4.1	2.11137e+09		0.00202145	4.18e-07	0.412537			0.208458	0.409025
	97SL17_Omp5.1	2.11174e+09		0.00202082	2.27e-07	0.0987714			0.113206	0.369678
	97SL17_Omp6.1	2.09934e+09		0.00202108	1.57e-07	0.231404			0.0782964	0.360523
	97SL17_Omp7.1	2.09132e+09		0.00202084	4.74e-07	0.113618			0.236385	0.423939
	97SL17_Omp8.1	2.10031e+09		0.00202111	1.47e-07	0.244766			0.0733094	0.359473
	97SL17_Omp9.1	2.09482e+09		0.00202146	3.17e-07	0.419466			0.158089	0.385796
	97SL17_Omp10.1	2.10442e+09		0.00201993	2.93e-07	-0.337234			0.14612	0.381048
	97SL17_Omp11.1	2.08972e+09		0.00202065	1.32e-07	0.0151335			0.0658288	0.358022
1	97SL21OMP (average, n=11)	2.06309e+09		0.00202484	1.18653e-06	2.09195	-1.20805	3.3		0.587215
	97SL21_Omp1.1	2.09546e+09		0.00202467	5.1e-08	2.0076			0.0254339	0.352836
	97SL21_Omp2.1	2.09635e+09		0.0020246	2.76e-07	1.97196			0.137642	0.377878
	97SL21_Omp3.1	2.07631e+09		0.00202622	3.82e-07	2.77419			0.190505	0.400173
	97SL21_Omp4.1	2.05938e+09		0.00202448	3.36e-07	1.91307			0.167564	0.389774
	97SL21_Omp5.1	2.06617e+09		0.00202448	7.55e-07	1.91505			0.376521	0.515378
	97SL21_Omp6.1	2.06217e+09		0.00202547	4.46e-07	2.40252			0.222422	0.416314
	97SL21_Omp7.1	2.08044e+09		0.00202528	3.09e-07	2.30849			0.154099	0.384178
	97SL21_Omp8.1	2.04437e+09		0.00202417	4.32e-07	1.75817			0.21544	0.412627
	97SL21_Omp9.1	2.06754e+09		0.00202481	5.34e-07	2.0749			0.266308	0.441323
	97SL21_Omp10.1	2.01871e+09		0.00202438	2.38e-07	1.86457			0.118691	0.371395
	97SL21_Omp11.1	2.02705e+09		0.0020247	2.04e-07	2.02096			0.101735	0.366328
1	97SL54CPX Di (average, n=5 out of 6)	1.97698e+09		0.00204314	1.75044e-06	11.1489	-0.25113	11.4		0.86629
	97SL54_Di1.1	2.01829e+09		0.00204242	3.29e-07	10.7906			0.164073	0.388287
	97SL54_Di2.1	1.9703e+09		0.00204296	4.2e-08	11.0588			0.0209455	0.352541
	97SL54_Di3.1	1.97464e+09		0.0020443	1.55e-07	11.722			0.077299	0.360307
	97SL54_Di4.1	2.00424e+09		0.00202589	2.19e-07	2.6089			0.109216	0.368476	outlier; rejected
	97SL54_Di5.1	1.98229e+09		0.00204226	6.16e-07	10.7139			0.307201	0.467139
	97SL54_Di6.1	1.93939e+09		0.00204377	2.34e-07	11.4592			0.116697	0.370762
1	97SL61CPX Di (average, n=11)	2.1225e+09		0.00203053	5.05716e-07	4.90878	-0.791218	5.7		0.250278
	97SL61_Di1.1	2.12694e+09		0.00203079	4.22e-07	5.03638			0.210453	0.410045
	97SL61_Di2.1	2.1259e+09		0.00203049	1.25e-07	4.88741			0.0623379	0.357397
	97SL61_Di3.1	2.13312e+09		0.00203046	3.91e-07	4.87454			0.194993	0.402329
	97SL61_Di4.1	2.11982e+09		0.00203052	3.08e-07	4.90275			0.153601	0.383978
	97SL61_Di5.1	2.12325e+09		0.00203074	3.23e-07	5.00965			0.161081	0.387032
	97SL61_Di6.1	2.12484e+09		0.0020308	2.35e-07	5.04034			0.117195	0.370919
	97SL61_Di7.1	2.11559e+09		0.00203069	1.67e-07	4.98639			0.0832835	0.361639
	97SL61_Di8.1	2.11623e+09		0.00203037	1.94e-07	4.82555			0.0967485	0.364975
	97SL61_Di9.1	2.11416e+09		0.00203057	3e-07	4.927			0.149611	0.3824
	97SL61_Di10.1	2.12285e+09		0.00203054	8.86e-07	4.91067			0.441851	0.564871	large error
	97SL61_Di11.1	2.12479e+09		0.0020299	3.47e-07	4.59592			0.17305	0.392164
1	97SL62CPX Di (average, n=11)	2.13348e+09		0.00203044	7.1563e-07	4.86046	0.160462	4.7		0.354165
	97SL62_Di1.1	2.14248e+09		0.00203031	2.38e-07	4.79833			0.118691	0.371395
	97SL62_Di2.1	2.11943e+09		0.00203008	2.71e-07	4.68252			0.135149	0.376977
	97SL62_Di3.1	2.12582e+09		0.0020306	1.21e-07	4.94284			0.0603431	0.357054
	97SL62_Di4.1	2.11798e+09		0.00203087	2.38e-07	5.07696			0.118691	0.371395
	97SL62_Di5.1	2.10994e+09		0.00203127	1.85e-07	5.27145			0.0922601	0.363811
	97SL62_Di6.1	2.14033e+09		0.00203046	2.69e-07	4.87058			0.134151	0.37662
	97SL62_Di7.1	2.12601e+09		0.00203018	3.27e-07	4.733			0.163076	0.387866
	97SL62_Di8.1	2.14746e+09		0.00203028	3.3e-07	4.78447			0.164572	0.388497
	97SL62_Di9.1	2.12876e+09		0.00203039	9.7e-08	4.83693			0.0483742	0.355227
	97SL62_Di10.1	2.12347e+09		0.00203014	3.1e-07	4.7137			0.154598	0.384379
	97SL62_Di11.1	2.18666e+09		0.00203022	1.54e-07	4.75428			0.0768003	0.360201	high CPS
1	97SL67CPX Di (average, n=10)	2.05528e+09		0.00203107	1.09672e-06	5.17381	-0.226191	5.4		0.542768
	97SL67_Di1.1	1.99569e+09		0.00203086	9.6e-08	5.07052			0.0478755	0.35516
	97SL67_Di2.1	2.02632e+09		0.00203148	2.75e-07	5.37687			0.137143	0.377696
	97SL67_Di3.1	2.04839e+09		0.0020312	3.77e-07	5.23978			0.188011	0.398992
	97SL67_Di4.1	1.99357e+09		0.00203041	4.02e-07	4.84881			0.200479	0.405016
	97SL67_Di5.1	2.04276e+09		0.00203155	2.95e-07	5.40903			0.147117	0.381431
	97SL67_Di6.1	2.07355e+09		0.00203088	1.88e-07	5.07844			0.0937562	0.364193
	97SL67_Di7.1	2.14445e+09		0.00203029	9.22e-07	4.78596			0.459805	0.579022	large error
	97SL67_Di8.1	2.09488e+09		0.00203119	3e-07	5.23087			0.149611	0.3824
	97SL67_Di9.1	2.07577e+09		0.00203075	4.01e-07	5.01609			0.19998	0.404769
	97SL67_Di10.1	2.05742e+09		0.0020321	1.69e-07	5.68172			0.0842809	0.36187	rejected?
1	GQ01-8OMP (average, n=11)	2.12386e+09		0.00203824	7.50609e-07	8.72261	0.212607	8.51		0.371475
	GQ01-8_Omp1.1	2.1222e+09		0.00203878	2.29e-07	8.98864			0.114203	0.369985
	GQ01-8_Omp2.1	2.11257e+09		0.00203858	2.52e-07	8.89263			0.125673	0.373684
	GQ01-8_Omp3.1	2.13372e+09		0.0020383	4.25e-07	8.75109			0.211949	0.410815
	GQ01-8_Omp4.1	2.12916e+09		0.00203811	3e-07	8.65854			0.149611	0.3824
	GQ01-8_Omp5.1	2.12925e+09		0.00203848	2.68e-07	8.84017			0.133653	0.376443
	GQ01-8_Omp6.1	2.11687e+09		0.00203825	4.05e-07	8.72585			0.201975	0.405759
	GQ01-8_Omp7.1	2.13453e+09		0.00203815	2.64e-07	8.67685			0.131658	0.375739
	GQ01-8_Omp8.1	2.12177e+09		0.00203735	2.19e-07	8.28143			0.109216	0.368476
	GQ01-8_Omp9.1	2.1154e+09		0.00203831	2.45e-07	8.75554			0.122182	0.372525
	GQ01-8_Omp10.1	2.12408e+09		0.00203841	2.58e-07	8.80404			0.128665	0.374701
	GQ01-8_Omp11.1	2.1229e+09		0.00203794	6.14e-07	8.57391			0.306204	0.466484
1	P260OMP (average, n=11)	2.13182e+09		0.00202173	1.08888e-06	0.553313	-0.856687	1.41		0.538887
	P260_Omp1.1	2.08429e+09		0.00202197	2.99e-07	0.668895			0.149112	0.382205
	P260_Omp2.1	2.11134e+09		0.00202207	3.82e-07	0.722344			0.190505	0.400173
	P260_Omp3.1	2.10905e+09		0.00202197	6.8e-08	0.668895			0.0339118	0.353548
	P260_Omp4.1	2.11863e+09		0.00202095	2.2e-07	0.164593			0.109715	0.368624
	P260_Omp5.1	2.11691e+09		0.0020214	4.51e-07	0.388287			0.224915	0.417652
	P260_Omp6.1	2.10955e+09		0.00202101	1.65e-07	0.193792			0.0822861	0.36141
	P260_Omp7.1	2.20549e+09		0.00202163	3.1e-07	0.500629			0.154598	0.384379
	P260_Omp8.1	2.16809e+09		0.00202138	4.66e-07	0.377399			0.232396	0.421728
	P260_Omp9.1	2.13798e+09		0.00202242	2.4e-07	0.891104			0.119689	0.371715
	P260_Omp10.1	2.14396e+09		0.00202266	2.48e-07	1.01384			0.123678	0.373018
	P260_Omp11.1	2.14479e+09		0.00202162	1.85e-07	0.49667			0.0922601	0.363811
1	QJH01-1OMP (average, n=11)	2.13443e+09		0.00202843	7.39808e-07	3.8677	0.327695	3.54		0.36613	(high-Fe?)
	QJH01-1_Omp1.1	2.13625e+09		0.00202862	5.01e-07	3.96245			0.24985	0.431592
	QJH01-1_Omp2.1	2.13421e+09		0.00202856	2.5e-07	3.93077			0.124676	0.37335
	QJH01-1_Omp3.1	2.13574e+09		0.00202798	2.25e-07	3.64274			0.112208	0.369374
	QJH01-1_Omp4.1	2.13115e+09		0.00202866	4.6e-07	3.98125			0.229404	0.420086
	QJH01-1_Omp5.1	2.12729e+09		0.00202798	1.93e-07	3.64373			0.0962498	0.364843
	QJH01-1_Omp6.1	2.12363e+09		0.00202889	3.23e-07	4.09656			0.161081	0.387032
	QJH01-1_Omp7.1	2.12644e+09		0.00202879	1.43e-07	4.04707			0.0713146	0.359071
	QJH01-1_Omp8.1	2.13851e+09		0.00202887	5e-08	4.08568			0.0249352	0.3528
	QJH01-1_Omp9.1	2.14943e+09		0.00202821	6.02e-07	3.75904			0.300219	0.462578
	QJH01-1_Omp10.1	2.13746e+09		0.00202797	2.73e-07	3.63928			0.136146	0.377335
	QJH01-1_Omp11.1	2.13857e+09		0.0020282	3e-07	3.75607			0.149611	0.3824
1	QLP08-1OMP (average, n=11)	2.11364e+09		0.00200355	9.25282e-07	-8.4453	-0.835295	-7.61		0.457921
	QLP08-1_Omp1.1	2.10533e+09		0.00200341	6.23e-07	-8.51445			0.310692	0.469442
	QLP08-1_Omp2.1	2.11675e+09		0.0020038	2.5e-07	-8.3244			0.124676	0.37335
	QLP08-1_Omp3.1	2.10076e+09		0.00200394	4.43e-07	-8.25264			0.220926	0.415517
	QLP08-1_Omp4.1	2.10001e+09		0.00200424	3.33e-07	-8.10566			0.166068	0.389134
	QLP08-1_Omp5.1	2.11252e+09		0.00200387	2.73e-07	-8.2858			0.136146	0.377335
	QLP08-1_Omp6.1	2.11732e+09		0.00200318	9.5e-08	-8.62778			0.0473768	0.355093
	QLP08-1_Omp7.1	2.1111e+09		0.00200318	2.84e-07	-8.63075			0.141632	0.379349
	QLP08-1_Omp8.1	2.12345e+09		0.0020039	3.91e-07	-8.27096			0.194993	0.402329
	QLP08-1_Omp9.1	2.11121e+09		0.00200341	3.06e-07	-8.51296			0.152603	0.383581
	QLP08-1_Omp10.1	2.12575e+09		0.00200259	3.03e-07	-8.91878			0.151107	0.382988
	QLP08-1_Omp11.1	2.12589e+09		0.00200353	2.4e-07	-8.45407			0.119689	0.371715
1	TP03-2OMP (average, n=10)	2.08494e+09		0.00201272	1.49514e-06	-3.90867	-0.968671	-2.94		0.739943
	TP03-2_Omp1.1	2.08602e+09		0.0020136	2.69e-07	-3.4739			0.134151	0.37662
	TP03-2_Omp2.1	2.07837e+09		0.00201215	4.51e-07	-4.19002			0.224915	0.417652
	TP03-2_Omp3.1	2.07766e+09		0.00201361	1.65e-07	-3.46697			0.0822861	0.36141
	TP03-2_Omp4.1	2.07656e+09		0.0020122	7.22e-07	-4.16231			0.360064	0.50348
	TP03-2_Omp5.1	2.08002e+09		0.00201241	7.2e-07	-4.06333			0.359066	0.502767
	TP03-2_Omp6.1	2.07741e+09		0.00201251	3.53e-07	-4.00889			0.176042	0.393494
	TP03-2_Omp7.1	2.09783e+09		0.00201331	1.37e-07	-3.61396			0.0683224	0.358489
	TP03-2_Omp8.1	2.08445e+09		0.00201337	3.99e-07	-3.58773			0.198983	0.404278
	TP03-2_Omp9.1	2.08693e+09		0.0020127	3.79e-07	-3.91783			0.189009	0.399463
	TP03-2_Omp10.1	2.10415e+09		0.00201132	2.61e-07	-4.60178			0.130162	0.375218
1	XHD07-1OMP (average, n=11)	2.09257e+09		0.00203787	8.29849e-07	8.53891	-1.07109	9.61		0.410691
	XHD07-1_Omp1.1	2.10111e+09		0.00203775	2.57e-07	8.48137			0.128167	0.37453
	XHD07-1_Omp2.1	2.09435e+09		0.00203775	3.82e-07	8.4784			0.190505	0.400173
	XHD07-1_Omp3.1	2.08262e+09		0.00203803	2.74e-07	8.61994			0.136645	0.377516
	XHD07-1_Omp4.1	2.08957e+09		0.0020381	3.8e-07	8.65211			0.189507	0.399699
	XHD07-1_Omp5.1	2.09863e+09		0.00203795	4.32e-07	8.57837			0.21544	0.412627
	XHD07-1_Omp6.1	2.10465e+09		0.00203852	2.64e-07	8.85947			0.131658	0.375739
	XHD07-1_Omp7.1	2.08594e+09		0.00203717	2.85e-07	8.19482			0.14213	0.379536
	XHD07-1_Omp8.1	2.08505e+09		0.00203837	4.53e-07	8.78474			0.225913	0.41819
	XHD07-1_Omp9.1	2.08304e+09		0.00203804	2.86e-07	8.6239			0.142629	0.379723
	XHD07-1_Omp10.1	2.10085e+09		0.00203762	1.26e-07	8.41554			0.0628366	0.357484
	XHD07-1_Omp11.1	2.09251e+09		0.00203726	3.78e-07	8.23936			0.18851	0.399227
1	XHD23-1OMP (average, n=11)	2.09382e+09		0.00201513	9.20718e-07	-2.71239	-1.19239	-1.52		0.455662
	XHD23-1_Omp1.1	2.10059e+09		0.00201438	3.5e-07	-3.08442			0.174546	0.392827
	XHD23-1_Omp2.1	2.10079e+09		0.00201488	3.77e-07	-2.83845			0.188011	0.398992
	XHD23-1_Omp3.1	2.07723e+09		0.00201599	3.31e-07	-2.29109			0.165071	0.388709
	XHD23-1_Omp4.1	2.08611e+09		0.00201521	2.19e-07	-2.67266			0.109216	0.368476
	XHD23-1_Omp5.1	2.08999e+09		0.00201528	2.17e-07	-2.64247			0.108219	0.368181
	XHD23-1_Omp6.1	2.09521e+09		0.00201468	2.22e-07	-2.93545			0.110712	0.368922
	XHD23-1_Omp7.1	2.08929e+09		0.00201488	2.7e-08	-2.83697			0.013465	0.352176
	XHD23-1_Omp8.1	2.11037e+09		0.00201575	9.63e-07	-2.41037			0.480251	0.595389	large error
	XHD23-1_Omp9.1	2.11052e+09		0.00201521	2.11e-07	-2.67316			0.105226	0.367313
	XHD23-1_Omp10.1	2.0896e+09		0.00201489	6.41e-07	-2.83152			0.319669	0.475431
	XHD23-1_Omp11.1	2.08235e+09		0.00201532	2.47e-07	-2.61971			0.12318	0.372853
1	97M44OPX (average, n=11)	2.12049e+09		0.00203328	8.87225e-07	6.26687	-1.72313	7.99		0.439086
	97M44_Opx1.1	2.13195e+09		0.00203286	4.56e-07	6.05884			0.227409	0.419
	97M44_Opx2.1	2.1185e+09		0.00203342	1.55e-07	6.33895			0.077299	0.360307
	97M44_Opx3.1	2.12046e+09		0.00203313	2.95e-07	6.19246			0.147117	0.381431
	97M44_Opx4.1	2.12002e+09		0.00203271	3.94e-07	5.98361			0.196489	0.403056
	97M44_Opx5.1	2.12214e+09		0.00203358	2.77e-07	6.41516			0.138141	0.37806
	97M44_Opx6.1	2.12124e+09		0.00203388	2.66e-07	6.56413			0.132655	0.37609
	97M44_Opx7.1	2.12729e+09		0.0020332	3.36e-07	6.22661			0.167564	0.389774
	97M44_Opx8.1	2.11976e+09		0.00203345	6.09e-07	6.3533			0.30371	0.464851
	97M44_Opx9.1	2.12374e+09		0.00203353	2.74e-07	6.38943			0.136645	0.377516
	97M44_Opx10.1	2.10946e+09		0.00203381	3.16e-07	6.52751			0.15759	0.385592
	97M44_Opx11.1	2.11085e+09		0.00203251	2.63e-07	5.88562			0.131159	0.375565
1	97M43OPX (average, n=12)	2.12312e+09		0.00203318	1.05307e-06	6.22054	-1.84946	8.07		0.521165
	97M43_Opx1.1	2.14221e+09		0.00203321	2.19e-07	6.23156			0.109216	0.368476
	97M43_Opx2.1	2.13095e+09		0.00203328	3.08e-07	6.26867			0.153601	0.383978
	97M43_Opx3.1	2.12541e+09		0.00203306	2.72e-07	6.15732			0.135647	0.377156
	97M43_Opx4.1	2.12522e+09		0.00203358	4.82e-07	6.41417			0.240375	0.426177
	97M43_Opx5.1	2106254094		0.00203357	4.83e-07	6.41071			0.240874	0.426458
	97M43_Opx6.1	2.12583e+09		0.0020334	3.03e-07	6.32658			0.151107	0.382988
	97M43_Opx7.1	2.11266e+09		0.00203386	2.72e-07	6.55572			0.135647	0.377156
	97M43_Opx8.1	2.1189e+09		0.00203366	1.66e-07	6.45773			0.0827848	0.361524
	97M43_Opx9.1	2.1253e+09		0.00203293	2.33e-07	6.09199			0.116198	0.370605
	97M43_Opx10.1	2.12432e+09		0.00203211	1.87e-07	5.68717			0.0932575	0.364065
	97M43_Opx11.1	2.11437e+09		0.00203232	3.58e-07	5.7906			0.178536	0.394615
	97M43_Opx12.1	2.12603e+09		0.00203325	3.68e-07	6.25432			0.183523	0.396897
	Session-180716
	BF064 & BF065
1	97SL65CPX Di (average, n=15)	1.95271e+09		0.00202927	7.18091e-07	4.87	-7.01661e-14	4.87		0.358114
	97SL65_Di1.1	1.95334e+09		0.00202968	9.7e-08	5.07365			0.0483742	0.361367
	97SL65_Di10.1	1.96531e+09		0.00202834	2.43e-07	4.41307			0.121185	0.378063
	97SL65_Di11.1	1.95809e+09		0.00202894	3.27e-07	4.70672			0.163076	0.393497
	97SL65_Di12.1	1.94217e+09		0.00202936	1.16e-07	4.91618			0.0578496	0.362757
	97SL65_Di13.1	1.92672e+09		0.00202889	1.68e-07	4.68493			0.0837822	0.367784
	97SL65_Di14.1	1.94419e+09		0.00202976	2.27e-07	5.11228			0.113206	0.375581
	97SL65_Di15.1	1.94234e+09		0.00202918	3.05e-07	4.82854			0.152105	0.389078
	97SL65_Di2.1	1.95197e+09		0.00202949	2.03e-07	4.97858			0.101237	0.372149
	97SL65_Di3.1	1.95832e+09		0.0020291	1.59e-07	4.78545			0.0792938	0.366788
	97SL65_Di4.1	1.95568e+09		0.00202944	1.82e-07	4.95382			0.090764	0.369437
	97SL65_Di5.1	1.95261e+09		0.00202925	8.75e-07	4.86171			0.436365	0.5645	large error
	97SL65_Di6.1	1.95805e+09		0.00202914	2.6e-07	4.80873			0.129663	0.380865
	97SL65_Di7.1	1.96026e+09		0.00202941	2.41e-07	4.94243			0.120188	0.377744
	97SL65_Di8.1	1.95172e+09		0.0020296	5.01e-07	5.03701			0.24985	0.436659
	97SL65_Di9.1	1.96988e+09		0.00202942	3.74e-07	4.94689			0.186515	0.403774
1	95AK24 (or UWC3) Di (average, n=22)	1.98936e+09		0.00204187	9.42354e-07	11.1123	0.932253	10.18		0.469955
	UWC3_Di1.1	1.98125e+09		0.00204168	3.31e-07	11.0149			0.165071	0.394327
	UWC3_Di2.1	1.99593e+09		0.0020422	2.75e-07	11.2724			0.137143	0.383476
	UWC3_Di3.1	1.98007e+09		0.00204218	1.16e-07	11.2625			0.0578496	0.362757
	UWC3_Di4.1	1.9816e+09		0.00204247	2.57e-07	11.4091			0.128167	0.380358
	UWC3_Di5.1	1.95622e+09		0.00204248	4.72e-07	11.4145			0.235388	0.428548
	UWC3_Di6.1	2.00044e+09		0.00204156	4.26e-07	10.956			0.212448	0.416389
	UWC3_Di7.1	2.00401e+09		0.00204245	1.39e-07	11.3997			0.0693198	0.364762
	UWC3_Di8.1	1.98685e+09		0.00204145	2.92e-07	10.9035			0.145621	0.386589
	UWC3_Di9.1	1.99919e+09		0.00204125	2.82e-07	10.8055			0.140634	0.384739
	UWC3_Di10.1	1.97911e+09		0.00204166	1.73e-07	11.007			0.0862757	0.36836
	UWC3_Di11.1	1.94507e+09		0.00204243	5.8e-08	11.3868			0.0289248	0.35928
	UWC3_Di12.1	1.99922e+09		0.00204155	2.58e-07	10.952			0.128665	0.380527
	UWC3_Di13.1	1.9895e+09		0.00204173	3.6e-07	11.0397			0.179533	0.400597
	UWC3_Di1.2	2.00229e+09		0.00204248	4.2e-07	11.4111			0.209455	0.41487
	UWC3_Di2.2	1.99875e+09		0.00204207	2.85e-07	11.209			0.14213	0.385288
	UWC3_Di13.2	1.98295e+09		0.00204172	1.79e-07	11.0377			0.0892679	0.369072
	UWC3_Di13.3	2.01824e+09		0.0020409	2.51e-07	10.6321			0.125175	0.379361
	UWC3_Di13.4	1.9966e+09		0.00204162	2.14e-07	10.9867			0.106723	0.373678
	UWC3_Di13.5	1.98935e+09		0.00204157	1e-07	10.9629			0.0498703	0.36157
	UWC3_Di13.6	1.99018e+09		0.00204138	4.21e-07	10.8684			0.209954	0.415122
	UWC3_Di13.7	1.99359e+09		0.00204183	3.94e-07	11.0922			0.196489	0.408477
	UWC3_Di13.8	1.99561e+09		0.00204255	3.02e-07	11.4457			0.150608	0.388495
1	NRM-AG1 Cpx (average, n=10)	2.02798e+09		0.00203462	7.79853e-07	7.52008	2.02008	5.5		0.388915
	AG1_Cpx1.1	2.00657e+09		0.00203479	3.09e-07	7.60654			0.154099	0.389862
	AG1_Cpx1.2	2.02653e+09		0.00203441	3.13e-07	7.4154			0.156094	0.390655
	AG1_Cpx2.1	2.02884e+09		0.00203437	1.89e-07	7.39658			0.0942549	0.37031
	AG1_Cpx2.2	1.9942e+09		0.00203536	2.77e-07	7.88484			0.138141	0.383834
	AG1_Cpx3.1	2.03656e+09		0.00203519	3.74e-07	7.80264			0.186515	0.403774
	AG1_Cpx3.2	2.05184e+09		0.00203457	2.99e-07	7.49711			0.149112	0.387918
	AG1_Cpx4.1	2.0411e+09		0.00203411	2.23e-07	7.26833			0.111211	0.374985
	AG1_Cpx4.2	2.01886e+09		0.00203459	2.48e-07	7.50404			0.123678	0.37887
	AG1_Cpx5.1	2.05016e+09		0.00203434	2.54e-07	7.38321			0.126671	0.379857
	AG1_Cpx5.2	2.02513e+09		0.00203446	2.4e-07	7.44214			0.119689	0.377586
1	QJH01-1OMP (average, n=19)	1.9892e+09		0.00202703	7.80029e-07	3.7643	0.224298	3.54		0.389003
	QJH01-1_Omp1.1	2.0201e+09		0.00202747	2.86e-07	3.98077			0.142629	0.385472
	QJH01-1_Omp2.1	2.0209e+09		0.00202742	4.08e-07	3.9575			0.203471	0.411881
	QJH01-1_Omp3.1	2.0143e+09		0.00202773	1.3e-07	4.11051			0.0648314	0.363935
	QJH01-1_Omp4.1	1.99282e+09		0.00202674	2.78e-07	3.61681			0.13864	0.384014
	QJH01-1_Omp5.1	1.99838e+09		0.00202656	1.82e-07	3.52669			0.090764	0.369437
	QJH01-1_Omp6.1	2.00906e+09		0.00202687	2.37e-07	3.68465			0.118193	0.377114
	QJH01-1_Omp7.1	2.00294e+09		0.00202638	3.59e-07	3.44151			0.179035	0.400374
	QJH01-1_Omp8.1	1.99111e+09		0.00202724	2.1e-07	3.86639			0.104728	0.373113
	QJH01-1_Omp9.1	1.99827e+09		0.00202711	2.44e-07	3.80102			0.121684	0.378223
	QJH01-1_Omp10.1	1.93319e+09		0.00202673	2.73e-07	3.61136			0.136146	0.383121
	QJH01-1_Omp11.1	1.99458e+09		0.00202734	2.15e-07	3.91541			0.107221	0.373821
	QJH01-1_Omp12.1	1.99857e+09		0.00202775	3.08e-07	4.11596			0.153601	0.389665
	QJH01-1_Omp13.1	1.99343e+09		0.00202693	2.93e-07	3.71337			0.14612	0.386777
	QJH01-1_Omp14.1	1.98989e+09		0.00202687	2.01e-07	3.68465			0.100239	0.371879
	QJH01-1_Omp1.1	1.96113e+09		0.00202699	3.67e-07	3.74308			0.183024	0.402174
	QJH01-1_Omp2.1	1.96528e+09		0.00202666	2.21e-07	3.58066			0.110213	0.37469
	QJH01-1_Omp3.1	1.98402e+09		0.00202659	2.52e-07	3.54352			0.125673	0.379525
	QJH01-1_Omp4.1	1.95892e+09		0.00202715	2.02e-07	3.82281			0.100738	0.372013
	QJH01-1_Omp3.2	1.9679e+09		0.00202712	1.75e-07	3.80498			0.0872731	0.368595
1	QLP08-1OMP (average, n=18)	1.96781e+09		0.00200231	1.22676e-06	-8.48053	-0.870534	-7.61		0.61179
	QLP08-1_Omp1.1	1.96134e+09		0.00200359	3.23e-07	-7.84433			0.161081	0.392674
	QLP08-1_Omp2.1	1.96507e+09		0.00200267	2.57e-07	-8.30287			0.128167	0.380358
	QLP08-1_Omp3.1	1.96924e+09		0.00200215	2.33e-07	-8.55888			0.116198	0.376494
	QLP08-1_Omp4.1	1.96539e+09		0.00200213	4.27e-07	-8.57027			0.212946	0.416644
	QLP08-1_Omp5.1	1.9758e+09		0.00200279	5.36e-07	-8.23899			0.267305	0.446876
	QLP08-1_Omp6.1	1.987e+09		0.00200314	2.25e-07	-8.06914			0.112208	0.375282
	QLP08-1_Omp7.1	2.00064e+09		0.00200209	3.87e-07	-8.58612			0.192998	0.40681
	QLP08-1_Omp8.1	1.9923e+09		0.00200286	1.48e-07	-8.20532			0.0738081	0.365641
	QLP08-1_Omp9.1	1.99128e+09		0.00200236	2.94e-07	-8.45192			0.146619	0.386966
	QLP08-1_Omp10.1	1.97228e+09		0.00200218	2e-07	-8.54502			0.0997407	0.371744
	QLP08-1_Omp11.1	1.97603e+09		0.00200073	1.62e-07	-9.26304			0.0807899	0.367114
	QLP08-1_Omp12.1	1.9686e+09		0.00200182	2.72e-07	-8.7218			0.135647	0.382944
	QLP08-1_Omp13.1	1.99752e+09		0.00200239	2.53e-07	-8.44053			0.126172	0.379691
	QLP08-1_Omp6.1	1.93374e+09		0.0020017	6e-08	-8.78172			0.0299222	0.359362
	QLP08-1_Omp1.1	1.95072e+09		0.00200222	3.41e-07	-8.52472			0.170058	0.396441
	QLP08-1_Omp2.1	1.95928e+09		0.00200223	2.72e-07	-8.51778			0.135647	0.382944
	QLP08-1_Omp3.1	1.94597e+09		0.00200199	2.18e-07	-8.63613			0.108717	0.374253
	QLP08-1_Omp5.1	1.9083e+09		0.00200249	1.48e-07	-8.39102			0.0738081	0.365641
1	97M44OPX (average, n=15)	1.95597e+09		0.00203271	1.71514e-06	6.57691	-1.41309	7.99		0.855347
	97M44_Opx1.1	1.94835e+09		0.00203309	7.7e-08	6.76274			0.0384002	0.360167
	97M44_Opx10.1	1.96755e+09		0.00203419	2.75e-07	7.30745			0.137143	0.383476
	97M44_Opx11.1	1.9573e+09		0.00203216	1.58e-07	6.3042			0.0787951	0.36668
	97M44_Opx12.1	1.94585e+09		0.00203261	1.34e-07	6.52654			0.0668263	0.364296
	97M44_Opx13.1	1.95049e+09		0.0020318	3.05e-07	6.12494			0.152105	0.389078
	97M44_Opx14.1	1.95815e+09		0.00203344	2.83e-07	6.93804			0.141133	0.384921
	97M44_Opx15.1	1.94874e+09		0.00203347	3.82e-07	6.95141			0.190505	0.405633
	97M44_Opx2.1	1.96621e+09		0.0020337	2.46e-07	7.06283			0.122681	0.378545
	97M44_Opx3.1	1.96549e+09		0.00203154	1.2e-07	5.99322			0.0598444	0.36308
	97M44_Opx4.1	1.97075e+09		0.00203163	3.5e-07	6.04076			0.174546	0.398387
	97M44_Opx5.1	1.95913e+09		0.00203289	3.05e-07	6.66271			0.152105	0.389078
	97M44_Opx6.1	1.95961e+09		0.00203181	4.73e-07	6.12791			0.235887	0.428822
	97M44_Opx7.1	1.92662e+09		0.00203318	3.78e-07	6.80929			0.18851	0.4047
	97M44_Opx8.1	1.9565e+09		0.00203186	7.51e-07	6.15267			0.374526	0.518185
	97M44_Opx9.1	1.95877e+09		0.00203335	2.28e-07	6.88902			0.113704	0.375732
1	NRM-EN2 Opx (average, n=9)	1.94597e+09		0.00202671	1.05718e-06	3.60239	-1.99761	5.6		0.527219
	NRM-EN-2_Opx1.1	1.94945e+09		0.00202594	3.95e-07	3.22214			0.196988	0.408717
	NRM-EN-2_Opx1.2	1.90345e+09		0.00202638	4.69e-07	3.43904			0.233892	0.427728
	NRM-EN-2_Opx1.3	1.95112e+09		0.00202635	2.84e-07	3.42666			0.141632	0.385104
	NRM-EN-2_Opx2.1	1.96079e+09		0.00202685	1.63e-07	3.67277			0.0812886	0.367224
	NRM-EN-2_Opx2.2	1.91152e+09		0.00202752	2.73e-07	4.00207			0.136146	0.383121
	NRM-EN-2_Opx2.3	1.95581e+09		0.00202738	3.2e-07	3.93423			0.159585	0.392063
	NRM-EN-2_Opx2.4	1.95519e+09		0.00202683	2.19e-07	3.66187			0.109216	0.374398
	NRM-EN-2_Opx2.5	1.97075e+09		0.00202691	2.32e-07	3.70099			0.115699	0.37634
	NRM-EN-2_Opx2.6	1.95567e+09		0.00202622	2.52e-07	3.36179			0.125673	0.379525
	Session-180806
	BF062 & BF063
1	97SL65CPX Di (no data; assumed)			0.00203803	7.92252e-07	4.87	-7.01661e-14	4.87		0.395099	assumed
1	95AK24 (or UWC3) Di (average, n=31 out of 32)	1.86578e+09		0.00204074	7.92252e-07	11.299	1.119	10.18		0.395099
	UWC3_Di1.1	1.89355e+09		0.00204031	1.94e-07	11.0873			0.0967485	0.406772
	UWC3_Di2.1	1.88332e+09		0.0020407	2.53e-07	11.2799			0.126172	0.414756
	UWC3_Di3.1	1.88027e+09		0.00204051	4.13e-07	11.1853			0.205964	0.445561
	UWC3_Di4.1	1.86201e+09		0.00204025	4.74e-07	11.0581			0.236385	0.460414
	UWC3_Di5.1	1.8863e+09		0.00203998	3.48e-07	10.9269			0.173549	0.431534
	UWC3_Di6.3	1.15069e+08		0.00191879	1.765e-06				0.880211	0.964819	large error - rejected
	UWC3_Di6.3NEW	1.87808e+09		0.00203989	1.3e-07	10.8824			0.0648314	0.400382
	UWC3_Di5.7	1.87911e+09		0.00204101	3.85e-07	11.4333			0.192001	0.43928
	UWC3_Di7.7	1.86826e+09		0.00204089	3.86e-07	11.3739			0.1925	0.439498
	UWC3_Di4.8	1.86439e+09		0.00204111	3.43e-07	11.4833			0.171055	0.430538
	UWC3_Di5.8	1.87591e+09		0.00204149	9.8e-08	11.6714			0.0488729	0.39811
	UWC3_Di7.8	1.89241e+09		0.00204066	2.44e-07	11.261			0.121684	0.413412
	UWC3_Di4.9	1.86509e+09		0.00204055	3.67e-07	11.2051			0.183024	0.435432
	UWC3_Di5.9	1.87403e+09		0.00204096	3.13e-07	11.41			0.156094	0.424816
	UWC3_Di4.10	1.87034e+09		0.00204037	2.02e-07	11.1195			0.100738	0.407739
	UWC3_Di4.11	1.85607e+09		0.00204112	1.52e-07	11.4887			0.0758029	0.402305
	UWC3_Di1.2	1.84317e+09		0.00204054	3.89e-07	11.2011			0.193996	0.440156
	UWC3_Di2.2	1.8694e+09		0.00204058	3.6e-07	11.2239			0.179533	0.433976
	UWC3_Di5.10	1.86467e+09		0.00204124	4.08e-07	11.5467			0.203471	0.444413
	UWC3_Di2.3	1.84631e+09		0.00204051	1.98e-07	11.1868			0.0987433	0.407251
	UWC3_Di4.12	1.87581e+09		0.00204118	3.34e-07	11.517			0.166567	0.428774
	UWC3_Di5.11	1.86016e+09		0.00204048	1.41e-07	11.1734			0.0703172	0.401307
	UWC3_Di2.4	1.84621e+09		0.00204047	3.1e-07	11.168			0.154598	0.424268
	UWC3_Di-L1.1	1.848e+09		0.00204048	2.08e-07	11.1719			0.10373	0.408488
	UWC3_Di-L2.1	1.81845e+09		0.00204132	2.34e-07	11.5858			0.116697	0.411972
	UWC3_Di-L3.1	1.86843e+09		0.0020412	6.11e-07	11.5293			0.304708	0.498949
	UWC3_Di-L1.2	1.84796e+09		0.00204067	2.74e-07	11.268			0.136645	0.418061
	UWC3_Di-L2.2	1.87014e+09		0.00204075	2.09e-07	11.3051			0.104229	0.408615
	UWC3_Di-L3.2	1.88259e+09		0.00204116	4.08e-07	11.5081			0.203471	0.444413
	UWC3_Di-L1.3	1.85284e+09		0.00204094	3.33e-07	11.4016			0.166068	0.428581
	UWC3_Di-L2.3	1.83851e+09		0.00204111	2.8e-07	11.4838			0.139637	0.419048
	UWC3_Di-L3.3	1.87729e+09		0.0020404	2.03e-07	11.1323			0.101237	0.407862
1	944010-2OMP (average, n=11 or 11 out of 12)	1.8346e+09		0.0020356	1.36032e-06	8.75837	-0.641625	9.4		0.678397
	944010-2_Omp1.1	1.83689e+09		0.00203617	4.25e-07	9.04044			0.211949	0.448358
	944010-2_Omp2.1	1.8313e+09		0.00203487	2.54e-07	8.39396			0.126671	0.414908
	944010-2_Omp3.1	1.832e+09		0.00203471	5.03e-07	8.31674			0.250848	0.468004
	944010-2_Omp4.1	1.84051e+09		0.00203508	2.72e-07	8.49742			0.135647	0.417736
	944010-2_Omp5.1	1.82226e+09		0.00203537	4.04e-07	8.64245			0.201476	0.443504
	944010-2_Omp6.1	1.12594e+08		0.00191553	2.649e-06				1.32107	1.37888	large error - rejected
	944010-2_Omp6.1NEW	1.83001e+09		0.0020355	1.87e-07	8.70878			0.0932575	0.405955
	944010-2_Omp7.1	1.79393e+09		0.00203563	7e-08	8.77363			0.0349092	0.396638
	944010-2_Omp8.1	1.85349e+09		0.00203683	3.1e-07	9.36764			0.154598	0.424268
	944010-2_Omp9.1	1.84043e+09		0.00203614	2.59e-07	9.02361			0.129164	0.415676
	944010-2_Omp10.1	1.85406e+09		0.0020363	8.1e-08	9.1038			0.040395	0.397158
	944010-2_Omp11.1	1.84567e+09		0.00203503	2.29e-07	8.47366			0.114203	0.411273
1	95HN24-2OMP (average, n=10)	1.83448e+09		0.00203496	7.47756e-07	8.44029	-0.959708	9.4		0.372908
	95HN24-2_Omp1.1	1.83808e+09		0.00203518	1.71e-07	8.54642			0.0852783	0.404197
	95HN24-2_Omp2.1	1.84428e+09		0.00203414	2.08e-07	8.0326			0.10373	0.408488
	95HN24-2_Omp3.1	1.84872e+09		0.00203515	3.87e-07	8.53306			0.192998	0.439717
	95HN24-2_Omp4.1	1.80929e+09		0.00203529	5.8e-08	8.60582			0.0289248	0.396156
	95HN24-2_Omp5.1	1.83703e+09		0.00203462	2.21e-07	8.27417			0.110213	0.410183
	95HN24-2_Omp6.1	1.82446e+09		0.00203482	2.82e-07	8.37168			0.140634	0.419382
	95HN24-2_Omp7.1	1.82884e+09		0.0020353	2.13e-07	8.60632			0.106224	0.409129
	95HN24-2_Omp8.1	1.83165e+09		0.00203485	4.38e-07	8.38604			0.218432	0.451459
	95HN24-2_Omp9.1	1.84064e+09		0.00203494	2.52e-07	8.42811			0.125673	0.414604
	95HN24-2_Omp10.1	1.84177e+09		0.00203532	5.8e-08	8.61869			0.0289248	0.396156
1	95HN68OMP (average, n=10 or 10 out of 11)	1.82978e+09		0.00203529	8.19939e-07	8.60548	-3.89452	12.5		0.408906	IMF outlier?
	95HN68_Omp1.1	1.82051e+09		0.00203578	1.67e-07	8.8464			0.0832835	0.403781
	95HN68_Omp2.1	1.81732e+09		0.00203534	8.61e-07	8.62612			0.429384	0.583501	large error
	95HN68_Omp3.1	1.80277e+09		0.00203493	2.15e-07	8.42514			0.107221	0.409389
	95HN68_Omp4.1	1.81582e+09		0.00203554	8.7e-08	8.72809			0.0433872	0.397474
	95HN68_Omp5.1	1.85437e+09		0.00203548	4.32e-07	8.6969			0.21544	0.450019
	95HN68_Omp6.1	1.84517e+09		0.00203549	2.58e-07	8.70284			0.128665	0.415521
	95HN68_Omp7.1	1.83408e+09		0.00203535	1.26e-07	8.63156			0.0628366	0.400064
	95HN68_Omp8.1	1.84681e+09		0.00203493	2.84e-07	8.42663			0.141632	0.419717
	95HN68_Omp9.1	1.84307e+09		0.00203567	3.76e-07	8.78997			0.187512	0.437337
	95HN68_Omp10.1	1.16457e+08		0.00191865	3.297e-06				1.64423	1.69103	large error - rejected
	95HN68_Omp10.1NEW	1.81788e+09		0.00203444	2.58e-07	8.18111			0.128665	0.415521
1	97SL54CPX Di (average, n=9 out of 11)	1.83436e+09		0.00203995	1.24012e-06	10.9084	-0.491566	11.4		0.618454
	97SL54_Di1.1	1.8379e+09		0.00203936	1.83e-07	10.618			0.0912627	0.405502
	97SL54_Di2.1	1.8263e+09		0.00203949	1.67e-07	10.6804			0.0832835	0.403781
	97SL54_Di3.1	1.82252e+09		0.00204119	1.48e-07	11.5249			0.0738081	0.401933
	97SL54_Di4.1	1.83679e+09		0.00202193	2.13e-07	1.99103			0.106224	0.409129	outlier
	97SL54_Di5.1	1.83434e+09		0.0020394	3.91e-07	10.6393			0.194993	0.440596
	97SL54_Di6.1	1.84501e+09		0.0020401	1.69e-07	10.9863			0.0842809	0.403988
	97SL54_Di7.1	1.81764e+09		0.00203955	3.31e-07	10.7141			0.165071	0.428195
	97SL54_Di8.1	1.83851e+09		0.00203987	2.53e-07	10.8685			0.126172	0.414756
	97SL54_Di9.1	1.83588e+09		0.00204064	5.51e-07	11.2536			0.274786	0.481259
	97SL54_Di10.1	1.84527e+09		0.00202274	2.21e-07	2.3905			0.110213	0.410183	outlier
	97SL54_Di11.1	1.85111e+09		0.00203991	1.91e-07	10.8908			0.0952523	0.406418
1	CPX2501 Di (average, n=10)	1.83098e+09		0.00202864	7.08691e-07	5.31387	0.0438723	5.27		0.353427
	CPX2501_Di1.1	1.82662e+09		0.00202896	1.79e-07	5.47193			0.0892679	0.405058
	CPX2501_Di2.1	1.83799e+09		0.00202897	2.49e-07	5.4749			0.124177	0.414153
	CPX2501_Di3.1	1.83789e+09		0.00202827	1.53e-07	5.13087			0.0763016	0.402399
	CPX2501_Di4.1	1.82867e+09		0.00202844	3.56e-07	5.21502			0.177538	0.433154
	CPX2501_Di5.1	1.82737e+09		0.00202864	3.67e-07	5.31402			0.183024	0.435432
	CPX2501_Di6.1	1.82805e+09		0.00202866	3.65e-07	5.31947			0.182027	0.435013
	CPX2501_Di7.1	1.83401e+09		0.00202921	2.91e-07	5.59321			0.145123	0.420908
	CPX2501_Di8.1	1.83722e+09		0.00202886	3.65e-07	5.42243			0.182027	0.435013
	CPX2501_Di9.1	1.83881e+09		0.0020282	2.93e-07	5.09275			0.14612	0.421253
	CPX2501_Di10.1	1.81321e+09		0.00202822	2.52e-07	5.10414			0.125673	0.414604
1	NIJ-JD Jadeite (average, n=9 out of 11)	1.79844e+09		0.00202637	1.26793e-06	4.18782	-5.89218	10.08		0.632319
	NIJ_Jd1.1	1.7903e+09		0.0020253	2.64e-07	3.6602			0.131658	0.416457
	NIJ_Jd1.2	1.77649e+09		0.00202594	9.3e-08	3.9775			0.0463794	0.397811
	NIJ_Jd1.3	1.72633e+09		0.00202597	3.4e-07	3.99037			0.169559	0.429946
	NIJ_Jd1.4	1.79435e+09		0.00202577	3.42e-07	3.89038			0.170557	0.43034
	NIJ_Jd2.1	1.80499e+09		0.00202695	3.17e-07	4.47647			0.158089	0.425553
	NIJ_Jd2.2	1.79414e+09		0.00202715	2.64e-07	4.57547			0.131658	0.416457
	NIJ_Jd2.3	1.83783e+09		0.00202674	2.25e-07	4.37252			0.112208	0.410723
	NIJ_Jd3.1	1.84928e+09		0.00202679	1.45e-07	4.39529			0.072312	0.401661
	NIJ_Jd4.2	1.81223e+09		0.0020267	3e-07	4.35222			0.149611	0.422476
	NIJ_Jd3.2	1.85911e+09		0.00202865	4.99e-07	5.31798			0.248853	0.466938	outlier; albite?
	NIJ_Jd4.1	1.84073e+09		0.00202789	3.45e-07	4.94029			0.172053	0.430935	outlier; albite?
1	QLP08-1OMP (average, n=6)	1.83977e+09		0.00200103	6.87127e-07	-8.35356	-0.743556	-7.61		0.342672
	QLP08-1_Omp1.1	1.85528e+09		0.00200047	2.01e-07	-8.63381			0.100239	0.407616
	QLP08-1_Omp2.1	1.83964e+09		0.00200124	1.32e-07	-8.25117			0.0658288	0.400545
	QLP08-1_Omp3.1	1.84955e+09		0.00200081	3.96e-07	-8.46601			0.197487	0.441706
	QLP08-1_Omp4.1	1.8416e+09		0.00200118	1.82e-07	-8.27939			0.090764	0.40539
	QLP08-1_Omp5.1	1.8339e+09		0.00200108	3.05e-07	-8.32938			0.152105	0.423366
	QLP08-1_Omp6.1	1.81864e+09		0.00200142	2.72e-07	-8.16158			0.135647	0.417736
	Session-180927
	BF064
1	97SL65CPX Di (average, n=5)	1.81935e+09		0.00202814	5.67911e-07	4.87	-7.01661e-14	4.87		0.283219
	97SL65_Di1.1	1.80373e+09		0.00202778	4.56e-07	4.68975			0.227409	0.363219
	97SL65_Di2.1	1.8191e+09		0.002028	4.42e-07	4.80123			0.220427	0.358889
	97SL65_Di3.1	1.8232e+09		0.0020282	4.14e-07	4.90181			0.206463	0.350486
	97SL65_Di4.1	1.83923e+09		0.00202855	4.88e-07	5.07175			0.243367	0.373418
	97SL65_Di5.1	1.81151e+09		0.00202817	5.88e-07	4.88546			0.293238	0.407678
1	95AK24 (or UWC3) Di (average, n=5)	1.85221e+09		0.00204087	1.13116e-07	11.178	0.998048	10.18		0.0564113
	UWC3_Di1.1	1.84799e+09		0.00204095	2.96e-07	11.217			0.147616	0.31938
	UWC3_Di2.1	1.86818e+09		0.00204086	6.15e-07	11.1744			0.306703	0.417468
	UWC3_Di3.1	1.84256e+09		0.00204081	3.6e-07	11.1486			0.179533	0.335329
	UWC3_Di4.1	1.85311e+09		0.00204083	5.83e-07	11.156			0.290744	0.405888
	UWC3_Di5.1	1.8492e+09		0.0020409	6.72e-07	11.1942			0.335129	0.438776
1	NRM-AG1 Cpx (average, n=5)	1.90064e+09		0.00203275	2.70882e-07	7.15379	1.65379	5.5		0.13509
	AG1_Cpx1.1	1.90221e+09		0.00203265	5.6e-07	7.10613			0.279274	0.397752
	AG1_Cpx2.1	1.90035e+09		0.00203263	2.1e-07	7.09671			0.104728	0.301962
	AG1_Cpx3.1	1.88952e+09		0.00203266	6.16e-07	7.11207			0.307201	0.417835
	AG1_Cpx4.1	1.90423e+09		0.00203289	3.55e-07	7.22405			0.17704	0.334
	AG1_Cpx5.1	1.9069e+09		0.0020329	4.68e-07	7.22999			0.233393	0.366995
1	QJH01-1OMP (average, n=5)	1.86076e+09		0.00202612	7.81554e-07	3.86956	0.329559	3.54		0.389764
	QJH01-1_Omp1.1	1.83992e+09		0.00202593	4.12e-07	3.77711			0.205466	0.349899
	QJH01-1_Omp2.1	1.8657e+09		0.0020268	6.69e-07	4.20519			0.333633	0.437634
	QJH01-1_Omp3.1	1.87125e+09		0.00202605	3.36e-07	3.83359			0.167564	0.329076
	QJH01-1_Omp4.1	1.86621e+09		0.00202602	5.87e-07	3.82071			0.292739	0.407319
	QJH01-1_Omp5.1	1.8607e+09		0.0020258	2.24e-07	3.71121			0.11171	0.304454
1	QLP08-1OMP (average, n=5)	1.81691e+09		0.00200191	7.97246e-07	-8.12503	-0.515026	-7.61		0.397589
	QLP08-1_Omp1.1	1.83091e+09		0.00200237	1.22e-07	-7.899			0.0608418	0.28968
	QLP08-1_Omp2.1	1.8035e+09		0.00200187	5.14e-07	-8.14475			0.256334	0.381995
	QLP08-1_Omp3.1	1.81283e+09		0.00200174	4.15e-07	-8.21064			0.206962	0.35078
	QLP08-1_Omp4.1	1.80863e+09		0.00200136	3.02e-07	-8.39743			0.150608	0.320774
	QLP08-1_Omp5.1	1.82866e+09		0.00200222	3.94e-07	-7.97332			0.196489	0.344704
1	97M44OPX (average, n=5)	1.85634e+09		0.0020324	1.4287e-06	6.98167	-1.00833	7.99		0.712498
	97M44_Opx1.1	1.84169e+09		0.00203221	3.42e-07	6.88664			0.170557	0.330609
	97M44_Opx2.1	1.87166e+09		0.00203296	4.55e-07	7.25972			0.22691	0.362907
	97M44_Opx3.1	1.86183e+09		0.00203129	5.47e-07	6.4323			0.272791	0.393227
	97M44_Opx4.1	1.8751e+09		0.00203308	5.08e-07	7.3162			0.253341	0.379993
	97M44_Opx5.1	1.83142e+09		0.00203247	4.93e-07	7.01348			0.245861	0.375047
1	NRM-EN2 Opx (average, n=5)	1.80205e+09		0.0020261	4.41233e-07	3.86173	-1.73827	5.6		0.220045
	NRM-EN2_Opx1.1	1.80654e+09		0.00202607	4.95e-07	3.84647			0.246858	0.375702
	NRM-EN2_Opx1.2	1.81491e+09		0.00202594	5.29e-07	3.78256			0.263814	0.387054
	NRM-EN2_Opx2.1	1.79134e+09		0.00202605	3.89e-07	3.8326			0.193996	0.343289
	NRM-EN2_Opx2.2	1.80074e+09		0.00202649	4.35e-07	4.05159			0.216936	0.356755
	NRM-EN2_Opx2.3	1.79673e+09		0.00202597	3.51e-07	3.79544			0.175045	0.332947
	Session-181114
	BF064
1	97SL65CPX Di (no data; assumed)			0.00204133	1.29766e-06	4.87	-7.01661e-14	4.87		0.647145	assumed
1	95AK24 (or UWC3) Di (average, n=5)	1.93676e+09		0.00204404	1.29766e-06	11.299	1.119	10.18		0.647145
	UWC3_Di1.1	1.90674e+09		0.00204501	5.96e-07	11.7775			0.297227	0.712138
	UWC3_Di2.1	1.91071e+09		0.00204403	4.79e-07	11.2937			0.238879	0.689826
	UWC3_Di3.1	1.93982e+09		0.00204364	2.45e-07	11.1004			0.122182	0.658578
	UWC3_Di4.1	1.95248e+09		0.0020433	2.9e-07	10.9324			0.144624	0.663108
	UWC3_Di5.1	1.97404e+09		0.00204423	3.67e-07	11.391			0.183024	0.672528
1	QJH01-1OMP (average, n=4 out of 5)	1.95117e+09		0.0020303	1.44372e-06	4.50758	0.967581	3.54		0.71999
	QJH01-1_Omp1.1	1.92571e+09		0.00202852	2.36e-07	3.62653			0.117694	0.65776	rejected
	QJH01-1_Omp1.1	1.91412e+09		0.00203123	2.96e-07	4.96633			0.147616	0.663767
	QJH01-1_Omp5.1	1.97887e+09		0.00202961	4.12e-07	4.16472			0.205466	0.678979
	QJH01-1_Omp6.1	1.9346e+09		0.00202987	2.5e-07	4.29618			0.124676	0.659045
	QJH01-1_Omp6.1	1.97711e+09		0.00203049	2.63e-07	4.60309			0.131159	0.660302
1	QLP08-1OMP (average, n=5 out of 6)	1.89118e+09		0.00200521	1.47866e-06	-7.89027	-0.280272	-7.61		0.737414
	QLP08-1_Omp1.1	1.90475e+09		0.00200496	4.73e-07	-8.01797			0.235887	0.688795
	QLP09-1_Omp1.1	1.95676e+09		0.00200351	3.11e-07	-8.73013			0.155097	0.665471	rejected
	QLP08-1_Omp2.1	1.93543e+09		0.00200424	2.18e-07	-8.37183			0.108717	0.656213
	QLP08-1_Omp3.1	1.90418e+09		0.00200497	3.1e-07	-8.01204			0.154598	0.665355
	QLP08-1_Omp5.1	1.86383e+09		0.00200586	2.49e-07	-7.56825			0.124177	0.658951
	QLP08-1_Omp6.1	1.84773e+09		0.00200604	4.56e-07	-7.48127			0.227409	0.685938
	Session-181201
	BF064
1	97SL65CPX Di (average, n=2)	1.95124e+09		0.00204577	1.07904e-06	4.87	-7.01661e-14	4.87		0.538123
	97SL65_Di1.1	1.95789e+09		0.00204539	5.23e-07	4.68261			0.260822	0.598001
	97SL65_Di2.1	1.94459e+09		0.00204615	3.17e-07	5.05739			0.158089	0.560864
1	95AK24 (or UWC3) Di (average, n=10)	2.00566e+09		0.00205752	8.92432e-07	10.6412	0.461187	10.18		0.445059
	UWC3_Di1.1	1.9866e+09		0.00205785	2.94e-07	10.8063			0.146619	0.55774
	UWC3_Di2.1	2.03257e+09		0.00205787	2.09e-07	10.8127			0.104229	0.548124
	UWC3_Di3.1	2.00691e+09		0.00205752	1.9e-07	10.6398			0.0947536	0.546402
	UWC3_Di4.1	2.00484e+09		0.00205768	4.58e-07	10.7179			0.228406	0.584591
	UWC3_Di5.1	2.01615e+09		0.00205697	1.17e-07	10.3692			0.0583483	0.541277
	UWC3_Di6.1	2.00087e+09		0.00205743	2.63e-07	10.5986			0.131159	0.553877
	UWC3_Di7.1	2.02583e+09		0.0020571	1.17e-07	10.4365			0.0583483	0.541277
	UWC3_Di8.1	2010853104		0.00205691	3.83e-07	10.3417			0.191003	0.571016
	UWC3_Di9.1	1.964e+09		0.00205753	2.75e-07	10.6452			0.137143	0.555324
	UWC3_Di10.1	2.00796e+09		0.00205834	2.72e-07	11.0441			0.135647	0.554957
1	NRM-AG1 Cpx (average, n=9)	2.06987e+09		0.00204991	7.74107e-07	6.90575	1.40575	5.5		0.38605
	AG1_Cpx1.1	2.07715e+09		0.00205059	2.3e-07	7.23584			0.114702	0.550212
	AG1_Cpx1.2	2.06588e+09		0.00205011	2.42e-07	7.0035			0.120686	0.551491
	AG1_Cpx2.2	2.07231e+09		0.0020494	3.83e-07	6.65279			0.191003	0.571016
	AG1_Cpx3.1	2.0903e+09		0.00204977	3.14e-07	6.83355			0.156593	0.560445
	AG1_Cpx3.2	2.05966e+09		0.00205031	2.65e-07	7.09879			0.132156	0.554114
	AG1_Cpx4.1	2.07518e+09		0.0020494	2.44e-07	6.65574			0.121684	0.55171
	AG1_Cpx4.2	2.05463e+09		0.00204988	2.98e-07	6.89053			0.148614	0.558268
	AG1_Cpx5.1	2.08104e+09		0.00204984	2.08e-07	6.86842			0.10373	0.54803
	AG1_Cpx5.2	2.0527e+09		0.00204993	3.54e-07	6.91263			0.176541	0.566342
1	QJH01-1OMP (average, n=10)	2.00207e+09		0.00204251	4.40489e-07	3.26664	-0.273356	3.54		0.219673
	QJH01-1_Omp1.1	2.00763e+09		0.00204228	1.95e-07	3.15696			0.0972472	0.54684
	QJH01-1_Omp2.1	2.00075e+09		0.00204261	4.55e-07	3.31758			0.22691	0.584008
	QJH01-1_Omp3.1	2.00624e+09		0.00204224	2.56e-07	3.13633			0.127668	0.55306
	QJH01-1_Omp4.1	1.97941e+09		0.00204277	1.6e-07	3.39814			0.0797925	0.544007
	QJH01-1_Omp5.1	2.01177e+09		0.00204219	4.32e-07	3.10981			0.21544	0.579647
	QJH01-1_Omp6.1	2.00286e+09		0.00204282	3.89e-07	3.42073			0.193996	0.572024
	QJH01-1_Omp7.1	1.9919e+09		0.00204262	2.1e-07	3.32151			0.104728	0.54822
	QJH01-1_Omp8.1	2.0177e+09		0.00204261	2.52e-07	3.31807			0.125673	0.552603
	QJH01-1_Omp9.1	2.00903e+09		0.00204251	3.98e-07	3.26994			0.198484	0.573561
	QJH01-1_Omp10.1	1.99341e+09		0.00204241	2.72e-07	3.21738			0.135647	0.554957
1	QLP08-1OMP (average, n=10)	1.97868e+09		0.00201734	9.21875e-07	-9.09239	-1.48239	-7.61		0.459742
	QLP08-1_Omp1.1	1.98365e+09		0.00201753	5.22e-07	-9.00009			0.260323	0.597783
	QLP08-1_Omp2.1	1.98393e+09		0.00201717	2.99e-07	-9.17643			0.149112	0.558401
	QLP08-1_Omp3.1	1.9752e+09		0.00201771	2.52e-07	-8.91463			0.125673	0.552603
	QLP08-1_Omp4.1	1.9807e+09		0.00201623	5.4e-07	-9.63865			0.2693	0.601747
	QLP08-1_Omp5.1	1.99041e+09		0.00201756	2.32e-07	-8.98683			0.115699	0.550421
	QLP08-1_Omp6.1	1.99074e+09		0.00201744	3.64e-07	-9.04332			0.181528	0.567917
	QLP08-1_Omp7.1	1.98776e+09		0.0020174	4.16e-07	-9.06493			0.207461	0.576729
	QLP08-1_Omp8.1	1.98082e+09		0.00201743	3.37e-07	-9.04971			0.168063	0.563757
	QLP08-1_Omp9.1	1.97303e+09		0.00201705	4.24e-07	-9.23734			0.21145	0.578176
	QLP08-1_Omp10.1	1.94053e+09		0.00201791	2.48e-07	-8.81197			0.123678	0.552153
1	97M44OPX (average, n=9)	1.94418e+09		0.0020486	1.68042e-06	6.26033	-1.72967	7.99		0.838033
	97M44_Opx1.1	1.94707e+09		0.00204747	1.1e-07	5.70331			0.0548574	0.540912
	97M44_Opx2.1	1.93934e+09		0.00204845	2.04e-07	6.18763			0.101735	0.547656
	97M44_Opx3.1	1.95557e+09		0.00204725	3.98e-07	5.59721			0.198484	0.573561
	97M44_Opx4.1	1.94028e+09		0.00204868	4e-07	6.30159			0.199481	0.573907
	97M44_Opx5.1	1.95518e+09		0.00204935	2.98e-07	6.6297			0.148614	0.558268
	97M44_Opx6.1	1.93413e+09		0.00204917	4.28e-07	6.54276			0.213445	0.578909
	97M44_Opx7.1	1.95588e+09		0.0020483	1.89e-07	6.11493			0.0942549	0.546316
	97M44_Opx8.1	1.92463e+09		0.00204893	2.5e-07	6.41996			0.124676	0.552377
	97M44_Opx9.1	1.94555e+09		0.00204979	2.99e-07	6.84583			0.149112	0.558401
	Session-190307
	BF064
1	97SL65CPX Di (average, n=13 or 13 out of 16)	2.05007e+09		0.00201674	1.25631e-06	4.87	-7.01661e-14	4.87		0.626524
	97SL65_Di-R1.1	2.03974e+09		0.00201683	3.93e-07	4.91362			0.19599	0.656464
	97SL65_Di-R2.1	1.99089e+09		0.00201707	2.69e-07	5.03619			0.134151	0.640725
	97SL65_Di-R3.1	1.99289e+09		0.00201642	1.87e-07	4.71033			0.0932575	0.633427
	97SL65_Di-R4.1	2.04168e+09		0.00201617	3.38e-07	4.58825			0.168562	0.648803
	97SL65_Di-R5.1	2.01548e+09		0.00201597	2.74e-07	4.48461			0.136645	0.641252
	97SL65_Di-R6.1	2.05159e+09		0.00201621	3.51e-07	4.6032			0.175045	0.650518
	97SL65_Di-R7.1	2.05427e+09		0.00201659	3.62e-07	4.79653			0.180531	0.652015
	97SL65_Di-R8.1	2.05867e+09		0.00201645	3.11e-07	4.72478			0.155097	0.645436
	97SL65_Di-R9.1	9.94422e+08		0.00202243	4.95e-07				0.246858	0.673403	very low CPS - rejected
	97DL65_Di-R1.2 --> 97SL65?	9.40327e+08		0.00202245	6.22e-07				0.310193	0.699108	very low CPS - rejected
	97DL65_Di-R3.2 --> 97SL65?	9.61025e+08		0.00202187	3.78e-07				0.18851	0.65427	very low CPS - rejected
	97SL65_Di1.1	2.06631e+09		0.00201773	1.98e-07	5.36255			0.0987433	0.634258
	97SL65_Di3.1	2.08354e+09		0.00201698	4.03e-07	4.98786			0.200977	0.65797
	97SL65_Di4.1	2.1073e+09		0.00201695	2.24e-07	4.97441			0.11171	0.636405
	97SL65_Di5.1	2.10998e+09		0.00201617	2.8e-07	4.58825			0.139637	0.641896
	97SL65_Di8.1	2.03857e+09		0.00201808	1.96e-07	5.53944			0.0977459	0.634103
1	95AK24 (or UWC3) Di (average, n=13)	2.10359e+09		0.00202918	1.26402e-06	11.0679	0.887911	10.18		0.630369
	UWC3_Di3.1	2.11773e+09		0.00202842	2.19e-07	10.689			0.109216	0.635972
	UWC3_Di4.1	2.08794e+09		0.00202943	3.5e-07	11.1917			0.174546	0.650384
	UWC3_Di5.1	2.13965e+09		0.00202861	2.45e-07	10.7832			0.122182	0.638327
	UWC3_Di6.1	2.10155e+09		0.00202926	2.4e-07	11.1085			0.119689	0.637854
	UWC3_Di7.1	2.13115e+09		0.00202926	4.86e-07	11.106			0.24237	0.671771
	UWC3_Di8.1	2.09016e+09		0.00202886	3.26e-07	10.9112			0.162577	0.647274
	UWC3_Di1.1	2.07952e+09		0.00202921	2.33e-07	11.0826			0.116198	0.637208
	UWC3_Di9.1	2.09784e+09		0.00202866	2.41e-07	10.8096			0.120188	0.637948
	UWC3_Di2.1	2.14247e+09		0.00202907	2.14e-07	11.0149			0.106723	0.635549
	UWC3_Di10.1	2.14677e+09		0.00202836	2.12e-07	10.6616			0.105725	0.635382
	UWC3_Di11.1	2.0699e+09		0.00203019	3.09e-07	11.5724			0.154099	0.645197
	UWC3_Di12.1	2.05442e+09		0.00203045	3.41e-07	11.6995			0.170058	0.649194
	UWC3_Di13.1	2.08754e+09		0.00202955	3.88e-07	11.2525			0.193497	0.655724
1	NRM-AG1 Cpx (average, n=7)	2.15118e+09		0.00202112	1.23879e-06	7.05409	1.55409	5.5		0.617787
	NRM-AG1_Cpx1.1	2.17984e+09		0.00202081	2.33e-07	6.89721			0.116198	0.637208
	NRM-AG1_Cpx1.2	2.10956e+09		0.00202178	4e-07	7.38152			0.199481	0.657515
	NRM-AG1_Cpx2.1	2.20247e+09		0.00202068	2.77e-07	6.83343			0.138141	0.641573
	NRM-AG1_Cpx2.2	2.11753e+09		0.0020215	2.19e-07	7.243			0.109216	0.635972
	NRM-AG1_Cpx3.1	2.13262e+09		0.00202134	2.09e-07	7.15979			0.104229	0.635135
	NRM-AG1_Cpx4.1	2.16077e+09		0.00202008	2.32e-07	6.53547			0.115699	0.637118
	NRM-AG1_Cpx5.1	2.15544e+09		0.00202167	2.51e-07	7.32821			0.125175	0.638906
1	QJH01-1OMP (average, n=5)	2.12509e+09		0.00201447	1.06485e-06	3.73941	0.199407	3.54		0.531045
	QJH01-1_Omp2.1	2.10074e+09		0.0020154	2.47e-07	4.2016			0.12318	0.638518
	QJH01-1_Omp4.1	2.18365e+09		0.00201416	2.83e-07	3.58375			0.141133	0.642224
	QJH01-1_Omp6.1	2.10483e+09		0.00201441	4.72e-07	3.71131			0.235388	0.669283
	QJH01-1_Omp8.1	2.12939e+09		0.0020141	1.75e-07	3.55485			0.0872731	0.632573
	QJH01-1_Omp10.1	2.10685e+09		0.00201428	2.1e-07	3.64553			0.104728	0.635217
1	QLP08-1OMP (average, n=5)	2.11298e+09		0.0019894	1.25921e-06	-8.75417	-1.14417	-7.61		0.62797
	QLP08-1_Omp1.1	2.12417e+09		0.00199012	2.87e-07	-8.39353			0.143128	0.642665
	QLP08-1_Omp3.1	2.11328e+09		0.00198959	2.06e-07	-8.6596			0.102733	0.634891
	QLP08-1_Omp5.1	2.10781e+09		0.00198905	4.18e-07	-8.92916			0.208458	0.660293
	QLP08-1_Omp7.1	2.14378e+09		0.00198851	2.4e-07	-9.19823			0.119689	0.637854
	QLP08-1_Omp9.1	2.07587e+09		0.00198973	2.72e-07	-8.59034			0.135647	0.64104
1	97M44OPX (average, n=4 out of 5)	2.13534e+09		0.00202129	1.20457e-06	7.13775	-0.852255	7.99		0.600723
	97M44_Opx1.1	2.15389e+09		0.00202059	2.51e-07	6.78859			0.125175	0.638906
	97M44_Opx2.1	2.13772e+09		0.00202102	2.15e-07	7.00085			0.107221	0.635633
	97M44_Opx4.1	2.1049e+09		0.00201957	3.23e-07	6.28135			0.161081	0.6469
	97M44_Opx5.1	2.12124e+09		0.00202193	2.15e-07	7.45626			0.107221	0.635633
	97M44_Opx9.1	2.1285e+09		0.00202163	1.83e-07	7.30529			0.0912627	0.633136
1	NRM-EN2 Opx (average, n=5)	2.09158e+09		0.00201426	5.97665e-07	3.63457	-1.96543	5.6		0.298058
	NRM-EN2_Opx1.1	2.07154e+09		0.0020145	2.39e-07	3.75266			0.11919	0.637761
	NRM-EN2_Opx1.2	2.09458e+09		0.00201448	2.11e-07	3.7427			0.105226	0.635299
	NRM-EN2_Opx2.1	2.11323e+09		0.00201425	2.09e-07	3.6271			0.104229	0.635135
	NRM-EN2_Opx2.2	2.1014e+09		0.00201376	1.8e-07	3.38544			0.0897666	0.632922
	NRM-EN2_Opx2.3	2.07715e+09		0.00201432	2.56e-07	3.66497			0.127668	0.6394
	Session-190627
	BF064
1	97SL65CPX Di (average, n=15)	1.61722e+09		0.00201204	1.19646e-06	4.87	-7.01661e-14	4.87		0.596678
	97SL65_Z6910_R1.1	1.68438e+09		0.00201099	2.99e-07	4.34846			0.149112	0.615028
	97SL65_Z6910_R2.1	1.66273e+09		0.00201184	2.31e-07	4.77098			0.1152	0.607697
	97SL65_Z6910_R3.1	1.66426e+09		0.002012	9.5e-08	4.85239			0.0473768	0.598556
	97SL65_Z6910_R4.1	1.64585e+09		0.00201228	1.69e-07	4.99472			0.0842809	0.602601
	97SL65_Z6910_R5.1	1.65606e+09		0.00201187	1.14e-07	4.78946			0.0568522	0.59938
	97SL65_Z6911_L3.1	1.63194e+09		0.00201249	2.92e-07	5.09761			0.145621	0.614191
	97SL65_Z6911_L1.1	1.65875e+09		0.00201254	2.29e-07	5.12008			0.114203	0.607509
	97SL65_Z6911_L2.1	1.65195e+09		0.00201287	2.62e-07	5.28489			0.13066	0.610816
	97SL65_Z6911_L3.2	1.64684e+09		0.00201252	1.14e-07	5.11009			0.0568522	0.59938
	97SL65_Z6911_L1.2	1.65748e+09		0.00201269	3.96e-07	5.19649			0.197487	0.62851
	97SL65_Z6911_L2.2	1.64408e+09		0.00201227	3.07e-07	4.98673			0.153102	0.616007
	97SL65_BF064_L1.1	1.58891e+09		0.00201113	1.52e-07	4.41788			0.0758029	0.601474
	97SL65_BF064_L2.1	1.49051e+09		0.00201208	3.86e-07	4.89134			0.1925	0.626961
	97SL65_BF064_L3.1	1.48711e+09		0.00201098	1.96e-07	4.34497			0.0977459	0.604631
	97SL65_BF064_L4.1	1.4874e+09		0.00201198	2.45e-07	4.8439			0.122182	0.609059
1	95AK24 (or UWC3) Di (average, n=5)	1.54877e+09		0.0020238	9.20855e-07	10.7433	0.563259	10.18		0.459234
	UWC3_BF064_L9.1	1.57324e+09		0.00202405	1.01e-07	10.8695			0.050369	0.5988
	UWC3_BF064_L10.1	1.57307e+09		0.0020244	2.94e-07	11.0468			0.146619	0.614428
	UWC3_BF064_L12.1	1.59826e+09		0.0020236	1.55e-07	10.6438			0.077299	0.601664
	UWC3_BF064_L12.2	1.4958e+09		0.00202374	4.3e-07	10.7177			0.214442	0.634043
	UWC3_BF064_L13.1	1.5035e+09		0.00202318	3.13e-07	10.4385			0.156094	0.616758
	Session-190905
	BF064
1	97SL65CPX Di (average, n=51)	1.2039e+09		0.0020122	1.0086e-06	4.87	-7.01661e-14	4.87		0.502994
	97SL65_Di1.1	1.17267e+09		0.00201144	3.88e-07	4.48939			0.193497	0.538929
	97SL65_Di3.1	1.18444e+09		0.00201248	2.93e-07	5.00625			0.14612	0.523788
	97SL65_Di5.1	1.18759e+09		0.00201327	4.48e-07	5.40327			0.223419	0.550381
	97SL65_Di7.1	1.20021e+09		0.00201178	2.62e-07	4.66068			0.13066	0.519688
	97SL65_Di9.1	1.20027e+09		0.00201286	1.69e-07	5.19902			0.0842809	0.510006
	97SL65_Z6952_Di1.1	1.19424e+09		0.00201219	3.6e-07	4.86493			0.179533	0.534074
	97SL65_Z6952_Di10.1	1.18655e+09		0.00201214	3.02e-07	4.83896			0.150608	0.525058
	97SL65_Z6952_Di2.1	1.18362e+09		0.00201213	2.14e-07	4.83447			0.106723	0.514191
	97SL65_Z6952_Di9.1	1.19141e+09		0.00201186	5.19e-07	4.69663			0.258827	0.565681
	97SL65_Z6952_Di3.1	1.18615e+09		0.00201178	5.92e-07	4.65718			0.295232	0.583237
	97SL65_Z6952_Di5.1	1.22574e+09		0.00201255	2.52e-07	5.04071			0.125673	0.518456
	97SL65_Z6952_Di8.1	1.21871e+09		0.0020114	4.26e-07	4.46891			0.212448	0.546019
	97SL65_Z6952_Di4.1	1.21833e+09		0.00201196	2.94e-07	4.74757			0.146619	0.523928
	97SL65_Z6952_Di7.1	1.20875e+09		0.00201174	1.83e-07	4.63671			0.0912627	0.511206
	97SL65_Z6953_Di1.1	1.1866e+09		0.0020134	1.68e-07	5.46869			0.0837822	0.509924
	97SL65_Z6953_Di2.1	1.21237e+09		0.00201317	2.79e-07	5.35383			0.139138	0.521884
	97SL65_Z6953_Di3.1	1.2096e+09		0.00201246	3.7e-07	4.99826			0.18452	0.535771
	97SL65_Z6953_Di4.1	1.22046e+09		0.00201182	4.82e-07	4.67816			0.240375	0.557479
	97SL65_Z6953_Di5.1	1.20176e+09		0.0020119	2.28e-07	4.72011			0.113704	0.515686
	97SL65_Z6953_Di6.1	1.19659e+09		0.00201198	3.17e-07	4.75606			0.158089	0.527253
	97SL65_Z6953_Di7.1	1.19464e+09		0.00201207	3.59e-07	4.805			0.179035	0.533907
	97SL65_Z6953_Di8.1	1.18954e+09		0.00201264	4.11e-07	5.08566			0.204967	0.543153
	97SL65_Z6953_Di9.1	1.19288e+09		0.00201198	1.54e-07	4.75656			0.0768003	0.508824
	97SL65_Z6953_Di10.1	1.18675e+09		0.00201257	2.32e-07	5.0527			0.115699	0.516129
	97SL65_Z6953_Di9.2	1.18572e+09		0.00201204	2.3e-07	4.78652			0.114702	0.515907
	97SL65_Z6954_Di1.1	1.16812e+09		0.0020132	3.62e-07	5.36781			0.180531	0.53441
	97SL65_Z6954_Di2.1	1.19374e+09		0.00201193	9.7e-08	4.73359			0.0483742	0.505315
	97SL65_Z6954_Di3.1	1.20388e+09		0.00201182	2.69e-07	4.67965			0.134151	0.520576
	97SL65_Z6954_Di4.1	1.21349e+09		0.00201262	2.32e-07	5.07767			0.115699	0.516129
	97SL65_Z6954_Di5.1	1.21684e+09		0.0020126	3.45e-07	5.06818			0.172053	0.531606
	97SL65_Z6954_Di6.1	1.2111e+09		0.00201248	2.9e-07	5.00825			0.144624	0.523373
	97SL65_Z6954_Di7.1	1.19846e+09		0.00201241	4.17e-07	4.9723			0.207959	0.544289
	97SL65_Z6954_Di10.1	1.19197e+09		0.00201244	3.33e-07	4.98928			0.166068	0.5297
	97SL65_Z6954_Di8.1	1.22339e+09		0.00201208	4.23e-07	4.8085			0.210952	0.545439
	97SL65_Z6954_Di9.1	1.20567e+09		0.00201199	3.32e-07	4.76455			0.16557	0.529544
	97SL65_Di1.1	1.21636e+09		0.00201192	5.32e-07	4.7281			0.26531	0.568676
	97SL65_Di3.1	1.21763e+09		0.00201202	3.61e-07	4.77604			0.180032	0.534242
	97SL65_Di5.1	1.20501e+09		0.00201311	1.86e-07	5.32237			0.0927588	0.511476
	97SL65_Di7.1	1.20745e+09		0.00201192	2.76e-07	4.72859			0.137642	0.521487
	97SL65_Di9.1	1.21273e+09		0.00201297	5.55e-07	5.25095			0.27678	0.574117
	97SL65_Di1.1	1.18182e+09		0.00201261	4.93e-07	5.07267			0.245861	0.559867
	97SL65_Di2.1	1.21735e+09		0.00201154	2.26e-07	4.53883			0.112707	0.515467
	97SL65_Di3.1	1.22046e+09		0.00201136	3.64e-07	4.44644			0.181528	0.534748
	97SL65_Di4.1	1.2247e+09		0.00201162	1.36e-07	4.57678			0.0678237	0.507546
	97SL65_Di5.1	1.21116e+09		0.00201212	2.04e-07	4.82947			0.101735	0.51318
	97SL65_Di6.1	1.22157e+09		0.00201214	1.72e-07	4.83796			0.085777	0.510256
	97SL65_Di7.1	1.20032e+09		0.0020115	6.03e-07	4.51885			0.300718	0.586033
	97SL65_Z6970_Di-R1.1	1.22603e+09		0.00201194	2.47e-07	4.74008			0.12318	0.517858
	97SL65_Z6970_Di-R2.1	1.21842e+09		0.00201191	3.27e-07	4.7236			0.163076	0.528769
	97SL65_Z6970_Di-R3.1	1.2293e+09		0.00201249	1.24e-07	5.01175			0.0618392	0.506781
	97SL65_Z6970_Di-R4.1	1.22625e+09		0.00201205	2.45e-07	4.79152			0.122182	0.517621
1	95AK24 (or UWC3) Di (average, n=16)	1.20991e+09		0.0020251	1.21633e-06	11.3094	1.12943	10.18		0.606586
	UWC3_Di1.1	1.20198e+09		0.00202562	3.72e-07	11.5702			0.185518	0.536116
	UWC3_Di2.1	1.21471e+09		0.0020252	1.46e-07	11.361			0.0728107	0.508237
	UWC3_Di3.1	1.21346e+09		0.00202432	3.25e-07	10.9205			0.162079	0.528463
	UWC3_Di4.1	1.21562e+09		0.00202464	1.75e-07	11.0793			0.0872731	0.510509
	UWC3_Di5.1	1.20377e+09		0.00202571	2.88e-07	11.6162			0.143627	0.523098
	UWC3_Di1.1	1.2271e+09		0.00202446	4.31e-07	10.9924			0.214941	0.546994
	UWC3_Di2.1	1.22925e+09		0.00202429	3.84e-07	10.906			0.191502	0.538216
	UWC3_Di3.1	1.24741e+09		0.00202486	4.32e-07	11.1892			0.21544	0.547191
	UWC3_Di4.1	1.25041e+09		0.00202596	3.59e-07	11.7415			0.179035	0.533907
	UWC3_Di5.1	1.24382e+09		0.00202464	2.93e-07	11.0803			0.14612	0.523788
	UWC3_BF084R_Di1.1	1.18894e+09		0.00202333	3.22e-07	10.4276			0.160582	0.528006
	UWC3_BF084R_Di2.1	1.24627e+09		0.00202488	2.02e-07	11.2022			0.100738	0.512983
	UWC3_BF084R_Di3.1	1.25568e+09		0.00202513	2.54e-07	11.326			0.126671	0.518699
	UWC3_BF084R_Di4.1	1.25187e+09		0.0020246	3.7e-07	11.0578			0.18452	0.535771
	UWC3_BF084R_Di5.1	1.2495e+09		0.00202433	2.02e-07	10.9235			0.100738	0.512983
	UWC3_BF084R_Di6.1	1.23821e+09		0.0020251	4.62e-07	11.31			0.230401	0.553252
1	NRM-AG1 Cpx (average, n=10)	1.25359e+09		0.00201705	8.90653e-07	7.28985	1.78985	5.5		0.444171
	NRM-AG1_Cpx1.1	1.24335e+09		0.00201708	3.03e-07	7.30294			0.151107	0.525201
	NRM-AG1_Cpx2.1	1.21831e+09		0.00201701	3.59e-07	7.26898			0.179035	0.533907
	NRM-AG1_Cpx3.1	1.24432e+09		0.00201678	3.22e-07	7.15362			0.160582	0.528006
	NRM-AG1_Cpx4.1	1.23841e+09		0.00201701	3.16e-07	7.27098			0.15759	0.527103
	NRM-AG1_Cpx5.1	1.24443e+09		0.00201665	3.76e-07	7.0917			0.187512	0.536809
	NRM-AG1_Cpx1.1	1.27378e+09		0.00201754	1.9e-07	7.53465			0.0947536	0.511841
	NRM-AG1_Cpx2.1	1.28314e+09		0.00201792	6.39e-07	7.72292			0.318671	0.595445
	NRM-AG1_Cpx3.1	1.26441e+09		0.00201704	2.47e-07	7.28596			0.12318	0.517858
	NRM-AG1_Cpx4.1	1.26667e+09		0.00201716	3.47e-07	7.34539			0.17305	0.53193
	NRM-AG1_Cpx5.1	1.25909e+09		0.00201631	3.74e-07	6.92141			0.186515	0.536462
1	NSH4CPX (average, n=5)	1.24734e+09		0.00201366	8.5473e-07	5.59753	0.29753	5.3		0.426257	6.48?
	NSH4_BF084R_Cpx1.1	1.24916e+09		0.00201418	8.4e-08	5.85721			0.0418911	0.504736
	NSH4_BF084R_Cpx2.1	1.27503e+09		0.00201383	4.08e-07	5.68292			0.203471	0.54259
	NSH4_BF084R_Cpx3.1	1.24138e+09		0.00201301	3.3e-07	5.27043			0.164572	0.529233
	NSH4_BF084R_Cpx4.1	1.24337e+09		0.00201367	2.16e-07	5.60103			0.10772	0.514399
	NSH4_BF084R_Cpx5.1	1.22773e+09		0.00201362	2.64e-07	5.57606			0.131658	0.519939
1	NSH5CPX (average, n=5)	1.24833e+09		0.00201349	1.17402e-06	5.51094	0.440936	5.07		0.585486	5.88?
	NSH5_Cpx1.2	1.26023e+09		0.00201315	1.28e-07	5.34384			0.063834	0.507029
	NSH5_Cpx2.1	1.26216e+09		0.00201345	2.96e-07	5.49016			0.147616	0.524208
	NSH5_Cpx3.1	1.20672e+09		0.00201271	4.47e-07	5.12411			0.22292	0.550179
	NSH5_Cpx4.1	1.25071e+09		0.0020141	2.62e-07	5.81576			0.13066	0.519688
	NSH5_Cpx5.1	1.26185e+09		0.00201403	4.65e-07	5.7808			0.231897	0.553877
1	NSH6CPX (average, n=5)	1.25054e+09		0.00201398	9.72446e-07	5.75813	0.588133	5.17		0.484962	6.09?
	NSH6_Cpx1.1	1.2241e+09		0.0020139	1.96e-07	5.71788			0.0977459	0.512404
	NSH6_Cpx2.1	1.22587e+09		0.00201452	3.87e-07	6.0265			0.192998	0.53875
	NSH6_Cpx3.2	1.26463e+09		0.00201326	2.78e-07	5.39728			0.13864	0.521751
	NSH6_Cpx4.1	1.26768e+09		0.00201433	1.45e-07	5.93212			0.072312	0.508166
	NSH6_Cpx5.1	1.2704e+09		0.0020139	2.72e-07	5.71688			0.135647	0.520964
1	NSH7CPX (average, n=5)	1.2691e+09		0.00201434	6.8465e-07	5.93462	0.914616	5.02		0.341437
	NSH7_Cpx1.1	1.2798e+09		0.00201467	1.49e-07	6.09891			0.0743068	0.508453
	NSH7_Cpx2.1	1.25468e+09		0.0020141	5.92e-07	5.81876			0.295232	0.583237
	NSH7_Cpx3.1	1.28656e+09		0.00201473	2.07e-07	6.13337			0.103232	0.513478
	NSH7_Cpx4.1	1.26732e+09		0.0020142	3.8e-07	5.8677			0.189507	0.537509
	NSH7_Cpx5.1	1.25712e+09		0.00201397	1.84e-07	5.75434			0.0917614	0.511296
1	NSH9CPX (average, n=6)	1.24736e+09		0.00201341	8.86517e-07	5.4706	0.320602	5.15		0.442109	5.33?
	NSH9_Cpx1.1	1.24262e+09		0.00201329	3.35e-07	5.40976			0.167066	0.530013
	NSH9_Cpx2.1	1.25952e+09		0.00201377	2.96e-07	5.64997			0.147616	0.524208
	NSH9_Cpx3.1	1.24152e+09		0.00201372	3.18e-07	5.6255			0.158588	0.527402
	NSH9_Cpx4.1	1.25157e+09		0.00201382	2.68e-07	5.67593			0.133653	0.520448
	NSH9_Cpx5.1	1.25282e+09		0.00201317	3.72e-07	5.35033			0.185518	0.536116
	NSH9_Cpx6.1	1.23609e+09		0.00201269	2e-07	5.11212			0.0997407	0.512788
1	QJH01-1OMP (average, n=10)	1.22921e+09		0.00201049	8.09097e-07	4.01627	0.476268	3.54		0.4035
	QJH01-1_Omp1.1	1.21348e+09		0.00201041	3.27e-07	3.97402			0.163076	0.528769
	QJH01-1_Omp3.1	1.21442e+09		0.0020102	2.13e-07	3.86815			0.106224	0.514088
	QJH01-1_Omp5.1	1.21506e+09		0.0020105	2.85e-07	4.01647			0.14213	0.522689
	QJH01-1_Omp7.1	1.22039e+09		0.00201047	3.01e-07	4.00448			0.15011	0.524915
	QJH01-1_Omp9.1	1.22635e+09		0.00201002	2.75e-07	3.78126			0.137143	0.521355
	QJH01-1_Omp1.1	1.22198e+09		0.00201007	1.58e-07	3.80523			0.0787951	0.509129
	QJH01-1_Omp3.1	1.23181e+09		0.00201062	5.9e-08	4.08089			0.0294235	0.503854
	QJH01-1_Omp5.1	1.23751e+09		0.00201037	1.9e-07	3.95504			0.0947536	0.511841
	QJH01-1_Omp7.1	1.25476e+09		0.00201138	1.7e-07	4.45693			0.0847796	0.510089
	QJH01-1_Omp9.1	1.25631e+09		0.0020109	3.65e-07	4.22022			0.182027	0.534918
1	QLP08-1OMP (average, n=10)	1.20478e+09		0.0019858	1.1286e-06	-8.31521	-0.705212	-7.61		0.562838
	QLP08-1_Omp1.1	1.17471e+09		0.00198541	2.39e-07	-8.51117			0.11919	0.516923
	QLP08-1_Omp3.1	1.20072e+09		0.00198506	3.45e-07	-8.68696			0.172053	0.531606
	QLP08-1_Omp5.1	1.20134e+09		0.00198562	2.53e-07	-8.4068			0.126172	0.518577
	QLP08-1_Omp7.1	1.19245e+09		0.00198509	2.06e-07	-8.67297			0.102733	0.513378
	QLP08-1_Omp9.1	1.19608e+09		0.00198665	2.16e-07	-7.88943			0.10772	0.514399
	QLP08-1_Omp1.1	1.19607e+09		0.00198623	1.48e-07	-8.09968			0.0738081	0.508381
	QLP08-1_Omp3.1	1.2306e+09		0.00198576	3.14e-07	-8.33788			0.156593	0.526806
	QLP08-1_Omp5.1	1.21403e+09		0.00198633	1.28e-07	-8.05024			0.063834	0.507029
	QLP08-1_Omp7.1	1.22729e+09		0.0019855	3.54e-07	-8.46573			0.176541	0.533076
	QLP08-1_Omp9.1	1.21449e+09		0.00198637	2.82e-07	-8.03126			0.140634	0.522285
1	06JY29CPX (average, n=6)	1.19621e+09		0.0020125	1.76221e-06	5.01941	-0.430595	5.45		0.878819
	06JY29_BF084R_Cpx2.1	1.15975e+09		0.00201153	1.62e-07	4.53283			0.0807899	0.509441
	06JY29_BF084R_Cpx3.1	1.23466e+09		0.00201402	5.08e-07	5.77481			0.253341	0.563192
	06JY29_BF084R_Cpx4.1	1.23198e+09		0.00201291	6.1e-07	5.22299			0.304209	0.587832
	06JY29_BF084R_Cpx5.1	1.17795e+09		0.00201185	3.97e-07	4.69364			0.197985	0.540556
	06JY29_BF084R_Cpx6.1	1.20021e+09		0.00201242	1.99e-07	4.98029			0.099242	0.512691
	06JY29_BF084R_Cpx8.1	1.17272e+09		0.00201229	3.76e-07	4.91187			0.187512	0.536809
1	06JY31CPX (average, n=6)	1.21157e+09		0.00201314	6.89009e-07	5.33577	0.145767	5.19		0.343611
	06JY31_BF084R_Cpx1.1	1.23808e+09		0.0020135	2.6e-07	5.51913			0.129663	0.519438
	06JY31_BF084R_Cpx2.1	1.24478e+09		0.00201352	1.59e-07	5.52512			0.0792938	0.509206
	06JY31_BF084R_Cpx3.1	1.18081e+09		0.00201277	3.62e-07	5.15357			0.180531	0.53441
	06JY31_BF084R_Cpx4.1	1.20805e+09		0.00201315	6.18e-07	5.34034			0.308199	0.589906
	06JY31_BF084R_Cpx4.2	1.17474e+09		0.00201271	1.88e-07	5.12361			0.0937562	0.511658
	06JY31_BF084R_Cpx5.1	1.22294e+09		0.00201317	3.39e-07	5.35283			0.16906	0.530645
1	13NQ124CPX (average, n=6)	1.21443e+09		0.00201337	9.82149e-07	5.45412	-0.565878	6.02		0.489801
	13NQ124_BF084R_Cpx2.1	1.22289e+09		0.00201322	4.2e-07	5.3763			0.209455	0.544862
	13NQ124_BF084R_Cpx3.1	1.19678e+09		0.00201281	3.94e-07	5.17255			0.196489	0.54001
	13NQ124_BF084R_Cpx4.1	1.21941e+09		0.00201398	2.12e-07	5.75584			0.105725	0.513985
	13NQ124_BF084R_Cpx8.1	1.18719e+09		0.00201382	3.17e-07	5.67743			0.158089	0.527253
	13NQ124_BF084R_Cpx11.1	1.22596e+09		0.00201356	1.43e-07	5.54559			0.0713146	0.508025
	13NQ124_BF084R_Cpx14.1	1.23437e+09		0.00201286	2.61e-07	5.19702			0.130162	0.519563
1	2C42Cpx (average, n=5)	1.21537e+09		0.00201381	1.13951e-06	5.67244	0.0624377	5.61		0.56828
	2C42_BF084R_Cpx1.1	1.18054e+09		0.00201363	4.95e-07	5.58355			0.246858	0.560305
	2C42_BF084R_Cpx3.1	1.21935e+09		0.00201405	3.04e-07	5.79229			0.151606	0.525345
	2C42_BF084R_Cpx4.1	1211114023		0.00201467	3.46e-07	6.09991			0.172551	0.531768
	2C42_BF084R_Cpx5.1	1233782803		0.00201352	2.75e-07	5.52612			0.137143	0.521355
	2C42_BF084R_Cpx6.1	1.23204e+09		0.00201319	5.43e-07	5.36032			0.270796	0.571256
1	2C47-2CPX (average, n=6)	1.22154e+09		0.00201376	1.20963e-06	5.6458	0.995804	4.65		0.603248
	2C47-2_BF084R_Cpx1.1	1.23155e+09		0.00201368	3.43e-07	5.60602			0.171055	0.531284
	2C47-2_BF084R_Cpx2.1	1.23297e+09		0.00201402	8.3e-08	5.77481			0.0413924	0.504694
	2C47-2_BF084R_Cpx3.1	1.2377e+09		0.00201409	4.75e-07	5.81277			0.236884	0.555983
	2C47-2_BF084R_Cpx4.1	1.23947e+09		0.00201413	2.7e-07	5.83374			0.13465	0.520705
	2C47-2_BF084R_Cpx5.1	1.16491e+09		0.00201257	4.21e-07	5.0522			0.209954	0.545054
	2C47-2_BF084R_Cpx6.1	1.22261e+09		0.00201406	1.12e-07	5.79529			0.0558548	0.506086
1	97M44OPX (average, n=114 out of 115 or 120)	1.20488e+09		0.00201527	1.66426e-06	6.40346	-1.58654	7.99		0.829972
	97M44_Opx1.1	8.43997e+08		0.00202211	2.82e-07	9.81436			0.140634	0.522285	rejected
	97M44_Opx2.1	1.21848e+09		0.0020171	3.57e-07	7.31293			0.178037	0.533573
	97M44_Opx3.1	1.205e+09		0.00201582	2.5e-07	6.67521			0.124676	0.518215
	97M44_Opx4.1	1.19397e+09		0.00201462	2.98e-07	6.07844			0.148614	0.524489
	97M44_Opx5.1	1.20366e+09		0.00201643	3.53e-07	6.98233			0.176042	0.532911
	97M44_Opx6.1	1.20356e+09		0.00201525	5.04e-07	6.39255			0.251346	0.562297
	97M44_Opx7.1	1.16548e+09		0.00201676	3.98e-07	7.14613			0.198484	0.540739
	97M44_Opx9.1	1.19664e+09		0.00201568	2.93e-07	6.60729			0.14612	0.523788
	97M44_Opx10.1	1.19468e+09		0.00201661	4.52e-07	7.07222			0.225414	0.551194
	97M44_Opx11.1	1.1868e+09		0.00201622	9.3e-08	6.87297			0.0463794	0.505128
	97M44_Opx12.1	1.21099e+09		0.00201608	1.59e-07	6.80605			0.0792938	0.509206
	97M44_Z6952_Opx4.1	1.1799e+09		0.00201442	4.34e-07	5.97607			0.216437	0.547584
	97M44_Z6952_Opx55.1	1.18231e+09		0.00201381	6.18e-07	5.67244			0.308199	0.589906
	97M44_Z6952_Opx6.1	1.18283e+09		0.00201461	4.58e-07	6.07195			0.228406	0.552424
	97M44_Z6952_Opx52.1	1.17719e+09		0.00201398	6.57e-07	5.75833			0.327648	0.600297
	97M44_Z6952_Opx8.1	1.17567e+09		0.0020142	3.13e-07	5.8672			0.156094	0.526658
	97M44_Z6952_Opx49.1	1.17088e+09		0.0020145	4.22e-07	6.01552			0.210453	0.545246
	97M44_Z6952_Opx9.1	1.18758e+09		0.00201473	5.82e-07	6.13137			0.290245	0.580728
	97M44_Z6952_Opx47.1	1.18143e+09		0.00201456	5.6e-07	6.04798			0.279274	0.575323
	97M44_Z6952_Opx10.1	1.18374e+09		0.0020144	6.09e-07	5.96458			0.30371	0.587574
	97M44_Z6952_Opx46.1	1.17979e+09		0.00201518	5.84e-07	6.3541			0.291243	0.581228
	97M44_Z6952_Opx25.1	1.22485e+09		0.00201496	4.22e-07	6.24573			0.210453	0.545246
	97M44_Z6952_Opx26.1	1.21488e+09		0.00201515	1.67e-07	6.34062			0.0832835	0.509842
	97M44_Z6952_Opx11.1	1.22698e+09		0.00201538	4.66e-07	6.45797			0.232396	0.554086
	97M44_Z6952_Opx44.1	1.21076e+09		0.00201524	3.53e-07	6.38656			0.176042	0.532911
	97M44_Z6952_Opx12.1	1.21733e+09		0.00201471	2.97e-07	6.12388			0.148115	0.524348
	97M44_Z6952_Opx42.1	1.20561e+09		0.00201584	3.81e-07	6.68669			0.190006	0.537685
	97M44_Z6952_Opx14.1	1.20359e+09		0.00201427	3.7e-07	5.90315			0.18452	0.535771
	97M44_Z6952_Opx40.1	1.20121e+09		0.00201534	3.42e-07	6.438			0.170557	0.531124
	97M44_Z6953_Opx1.1	1.19374e+09		0.00201562	3.73e-07	6.57533			0.186016	0.536288
	97M44_Z6953_Opx30.1	1.1948e+09		0.00201469	2.26e-07	6.1124			0.112707	0.515467
	97M44_Z6953_Opx2.1	1.2039e+09		0.00201598	2.64e-07	6.75411			0.131658	0.519939
	97M44_Z6953_Opx31.1	1.21441e+09		0.00201436	2.45e-07	5.9471			0.122182	0.517621
	97M44_Z6953_Opx3.1	1.20436e+09		0.00201525	2.58e-07	6.39206			0.128665	0.51919
	97M44_Z6953_Opx32.1	1.18329e+09		0.00201506	1.12e-07	6.29717			0.0558548	0.506086
	97M44_Z6953_Opx4.1	1.18823e+09		0.00201483	3.19e-07	6.18031			0.159086	0.527553
	97M44_Z6953_Opx33.1	1.20934e+09		0.00201355	1.12e-07	5.5411			0.0558548	0.506086
	97M44_Z6953_Opx6.1	1.1929e+09		0.00201475	1.81e-07	6.13887			0.0902653	0.511029
	97M44_Z6953_Opx34.1	1.21015e+09		0.00201641	3.96e-07	6.97135			0.197487	0.540374
	97M44_Z6953_Opx7.1	1.22772e+09		0.0020142	2.46e-07	5.8677			0.122681	0.517739
	97M44_Z6953_Opx35.1	1.2259e+09		0.00201468	3.06e-07	6.10591			0.152603	0.525634
	97M44_Z6953_Opx8.1	1.21633e+09		0.00201478	6.24e-07	6.15684			0.311191	0.591475
	97M44_Z6953_Opx38.1	1.19724e+09		0.00201543	2.99e-07	6.48045			0.149112	0.524631
	97M44_Z6953_Opx9.1	1.20441e+09		0.0020138	3.41e-07	5.66545			0.170058	0.530964
	97M44_Z6953_Opx26.1	1.1963e+09		0.00201419	3.5e-07	5.86021			0.174546	0.532419
	97M44_Z6953_Opx10.1	1.20866e+09		0.00201467	3.95e-07	6.10341			0.196988	0.540192
	97M44_Z6953_Opx39.1	1.19704e+09		0.0020143	3.06e-07	5.91864			0.152603	0.525634
	97M44_Z6953_Opx11.1	1.20445e+09		0.00201464	9.5e-08	6.08743			0.0473768	0.50522
	97M44_Z6953_Opx41.2	1.19025e+09		0.00201484	3.58e-07	6.18531			0.178536	0.53374
	97M44_Z6953_Opx12.1	1.20635e+09		0.00201367	3.2e-07	5.60252			0.159585	0.527703
	97M44_Z6953_Opx43.2	1.19258e+09		0.00201574	1.61e-07	6.63576			0.0802912	0.509362
	97M44_Z6953_Opx13.1	1.20135e+09		0.00201443	3.13e-07	5.98256			0.156094	0.526658
	97M44_Z6953_Opx44.1	1.18454e+09		0.00201425	1.47e-07	5.89367			0.0733094	0.508308
	97M44_Z6953_Opx14.1	1.18459e+09		0.00201378	1.88e-07	5.65895			0.0937562	0.511658
	97M44_Z6953_Opx45.1	1.19149e+09		0.00201637	5.95e-07	6.94937			0.296729	0.583996
	97M44_Z6953_Opx15.1	1.18066e+09		0.00201421	3.65e-07	5.87169			0.182027	0.534918
	97M44_Z6953_Opx46.1	1.20153e+09		0.00201581	2.5e-07	6.66971			0.124676	0.518215
	97M44_Z6953_Opx16.1	1.18607e+09		0.00201487	2.79e-07	6.20329			0.139138	0.521884
	97M44_Z6953_Opx47.1	1.18398e+09		0.00201422	2.8e-07	5.87769			0.139637	0.522017
	97M44_Z6953_Opx17.1	1.21564e+09		0.0020148	1.61e-07	6.16683			0.0802912	0.509362
	97M44_Z6953_Opx50.1	1.20526e+09		0.00201466	2.11e-07	6.09692			0.105226	0.513883
	97M44_Z6953_Opx18.1	1.20955e+09		0.00201496	4.41e-07	6.24374			0.219928	0.548973
	97M44_Z6953_Opx51.1	1.23301e+09		0.00201449	2.82e-07	6.01152			0.140634	0.522285
	97M44_Z6954_Opx15.1	1.20853e+09		0.00201471	3.29e-07	6.12089			0.164073	0.529078
	97M44_Z6954_Opx1.1	1.15858e+09		0.00201651	2.55e-07	7.01929			0.127169	0.518821
	97M44_Z6954_Opx16.1	1.20979e+09		0.00201612	1.33e-07	6.82403			0.0663275	0.507349
	97M44_Z6954_Opx2.1	1.19544e+09		0.00201653	2.23e-07	7.03277			0.111211	0.515142
	97M44_Z6954_Opx17.1	1.21099e+09		0.00201621	2.76e-07	6.86997			0.137642	0.521487
	97M44_Z6954_Opx3.1	1.21068e+09		0.00201471	2.26e-07	6.12289			0.112707	0.515467
	97M44_Z6954_Opx18.1	1.19757e+09		0.00201628	1.42e-07	6.90593			0.0708159	0.507955
	97M44_Z6954_Opx4.1	1.20281e+09		0.00201497	2.16e-07	6.25323			0.10772	0.514399
	97M44_Z6954_Opx19.1	1.20981e+09		0.00201499	1.5e-07	6.26172			0.0748055	0.508526
	97M44_Z6954_Opx5.1	1.20469e+09		0.00201541	3.02e-07	6.46946			0.150608	0.525058
	97M44_Z6954_Opx20.1	1.20873e+09		0.00201548	1.22e-07	6.50642			0.0608418	0.506661
	97M44_Z6954_Opx6.1	1.22208e+09		0.00201505	2.21e-07	6.28868			0.110213	0.514927
	97M44_Z6954_Opx21.1	1.20392e+09		0.00201502	3.95e-07	6.2737			0.196988	0.540192
	97M44_Z6954_Opx7.1	1.218e+09		0.00201499	3.5e-07	6.26271			0.174546	0.532419
	97M44_Z6954_Opx22.1	1.22007e+09		0.00201449	3.24e-07	6.01302			0.16158	0.52831
	97M44_Z6954_Opx8.1	1.20358e+09		0.00201491	1.6e-07	6.22176			0.0797925	0.509284
	97M44_Z6954_Opx23.1	1.21275e+09		0.00201596	3.47e-07	6.74712			0.17305	0.53193
	97M44_Z6954_Opx9.1	1.21213e+09		0.00201644	1.73e-07	6.98283			0.0862757	0.51034
	97M44_Z6954_Opx24.1	1.20451e+09		0.00201511	4.28e-07	6.32164			0.213445	0.546408
	97M44_Z6954_Opx27.1	1.20592e+09		0.0020145	2.73e-07	6.01751			0.136146	0.521094
	97M44_Z6954_Opx13.1	1.15505e+09		0.00201457	1.9e-07	6.05047			0.0947536	0.511841
	97M44_Z6954_Opx28.1	1.22271e+09		0.00201573	4.49e-07	6.63326			0.223918	0.550584
	97M44_Z6954_Opx10.1	1.1937e+09		0.00201542	4.77e-07	6.47695			0.237882	0.556409
	97M44_Z6954_Opx25.1	1.2047e+09		0.00201513	3.11e-07	6.33213			0.155097	0.526363
	97M44_Z6954_Opx11.1	1.07932e+09		0.00201614	4.44e-07	6.83301			0.221424	0.549574	low CPS
	97M44_Z6954_Opx26.1	1.21356e+09		0.00201597	2.78e-07	6.74812			0.13864	0.521751
	97M44_Z6954_Opx12.1	1.15962e+09		0.00201569	7.03e-07	6.61029			0.350588	0.613119
	97M44_Opx3.1	8.88875e+08		0.00202386	1.849e-06	10.6908			0.922103	1.05037	rejected
	97M44_Opx4.1	1.07575e+09		0.00201621	2.3e-07	6.86797			0.114702	0.515907	low CPS
	97M44_Opx5.1	1.24492e+09		0.00201644	5.91e-07	6.98683			0.294734	0.582985
	97M44_Opx6.1	1.20102e+09		0.00201531	5.71e-07	6.42152			0.28476	0.578006
	97M44_Opx7.1	1.18378e+09		0.00201517	2.11e-07	6.3521			0.105226	0.513883
	97M44_Opx9.1	1.22203e+09		0.00201673	2.32e-07	7.12865			0.115699	0.516129
	97M44_Opx10.1	1.21518e+09		0.0020162	3.09e-07	6.86597			0.154099	0.52607
	97M44_Opx11.1	1.22943e+09		0.0020158	3.92e-07	6.66722			0.195492	0.539648
	97M44_Opx12.1	1.25117e+09		0.00201737	3.13e-07	7.45076			0.156094	0.526658
	97M44_Opx1.1	8.97986e+08		0.00202307	8.52e-07	10.2958			0.424895	0.658437	rejected
	97M44_Opx8.2	1.19596e+09		0.00201524	2.24e-07	6.38606			0.11171	0.51525
	97M44_Opx9.2	1.23973e+09		0.00201576	3.42e-07	6.64325			0.170557	0.531124
	97M44_Opx2.1	1.24803e+09		0.00201512	2.98e-07	6.32813			0.148614	0.524489
	97M44_Opx3.1	1.24962e+09		0.00201659	1.41e-07	7.05974			0.0703172	0.507885
	97M44_Opx4.1	1.24642e+09		0.00201573	3.04e-07	6.63076			0.151606	0.525345
	97M44_Opx5.1	1.23624e+09		0.00201516	1.15e-07	6.34811			0.0573509	0.506253
	97M44_Opx6.1	1.23718e+09		0.00201543	2.7e-07	6.48344			0.13465	0.520705
	97M44_Opx7.1	1.24275e+09		0.00201552	1.6e-07	6.52539			0.0797925	0.509284
	97M44_Opx8.1	1.21836e+09		0.00201576	3.18e-07	6.64524			0.158588	0.527402
	97M44_Opx9.1	1.23934e+09		0.00201468	4.4e-07	6.10641			0.219429	0.548774
	97M44_Opx10.1	1.25761e+09		0.0020173	2.83e-07	7.4163			0.141133	0.522419
	97M44_Opx11.1	1.15891e+09		0.00201236	2.69e-07	4.94932			0.134151	0.520576	rejected
	97M44_Opx12.1	1.24952e+09		0.00201551	2.08e-07	6.5204			0.10373	0.513579
	97M44_Opx13.1	1.23636e+09		0.00201547	1.82e-07	6.50192			0.090764	0.511118
	97M44_Opx14.1	1.25976e+09		0.00201594	2.66e-07	6.73464			0.132655	0.520193
	97M44_Opx1.2	9.03185e+08		0.00202372	6.39e-07	10.6199			0.318671	0.595445	rejected
	97M44_Opx2.2	1.21383e+09		0.0020152	5.25e-07	6.36808			0.261819	0.567056
	97M44_Opx3.2	1.23798e+09		0.00201597	2.88e-07	6.75211			0.143627	0.523098
	97M44_Opx4.2	1.24896e+09		0.00201649	2.19e-07	7.0098			0.109216	0.514715
	97M44_Opx6.2	1.1651e+09		0.00201322	5.29e-07	5.3798			0.263814	0.56798	rejected
1	NRM-EN2 Opx (average, n=15)	1.20205e+09		0.0020105	1.68685e-06	4.01963	-1.58037	5.6		0.841236
	NRM-EN2_Opx1.1	1.19459e+09		0.00201036	8e-08	3.94855			0.0398963	0.504574
	NRM-EN2_Opx1.2	1.19049e+09		0.00201	1.92e-07	3.76727			0.095751	0.512027
	NRM-EN2_Opx2.1	1.19457e+09		0.00201062	4.77e-07	4.07939			0.237882	0.556409
	NRM-EN2_Opx2.2	1.19353e+09		0.00201022	2.79e-07	3.87964			0.139138	0.521884
	NRM-EN2_Opx2.3	1.19023e+09		0.00201004	1.46e-07	3.79025			0.0728107	0.508237
	NRM-EN2_Opx1.1	1.16685e+09		0.00201269	1.13e-07	5.11212			0.0563535	0.506141
	NRM-EN2_Opx1.2	1.21926e+09		0.00201015	2.23e-07	3.84368			0.111211	0.515142
	NRM-EN2_Opx2.1	1.21367e+09		0.00201039	2.93e-07	3.96203			0.14612	0.523788
	NRM-EN2_Opx2.2	1.20745e+09		0.00201106	3.35e-07	4.29812			0.167066	0.530013
	NRM-EN2_Opx2.3	1.21602e+09		0.00201073	2.49e-07	4.13532			0.124177	0.518096
	NRM-EN2_BF084R_Opx1.1	1.19006e+09		0.00201132	4.51e-07	4.42597			0.224915	0.55099
	NRM-EN2_BF084R_Opx1.2	1.17129e+09		0.00200893	4.25e-07	3.23593			0.211949	0.545826
	NRM-EN2_BF084R_Opx2.1	1.21149e+09		0.00201102	3.93e-07	4.28064			0.19599	0.539829
	NRM-EN2_BF084R_Opx2.2	1.2344e+09		0.0020103	2.84e-07	3.91959			0.141632	0.522554
	NRM-EN2_BF084R_Opx3.1	1.23685e+09		0.00200969	4.46e-07	3.61596			0.222422	0.549977
1	06JY34OPX (average, n=6)	1.20318e+09		0.00200984	6.52649e-07	3.68895	-1.95105	5.64		0.325478
	06JY34_BF084R_Opx1.1	1.21778e+09		0.00200971	1.54e-07	3.62645			0.0768003	0.508824
	06JY34_BF084R_Opx2.1	1.1979e+09		0.0020098	1.33e-07	3.66989			0.0663275	0.507349
	06JY34_BF084R_Opx3.1	1.20077e+09		0.00201011	3.36e-07	3.8267			0.167564	0.530171
	06JY34_BF084R_Opx4.1	1.21188e+09		0.00200968	2.04e-07	3.60747			0.101735	0.51318
	06JY34_BF084R_Opx5.1	1.20321e+09		0.00200941	2.19e-07	3.47513			0.109216	0.514715
	06JY34_BF084R_Opx6.1	1.18754e+09		0.00201032	3.4e-07	3.92808			0.169559	0.530805
1	06JY31Opx (average, n=5)	1.21564e+09		0.0020097	2.33701e-07	3.61796	-1.92204	5.54		0.116547
	06JY31_BF084R_Opx1.1	1.2204e+09		0.00200971	3.36e-07	3.62445			0.167564	0.530171
	06JY31_BF084R_Opx2.1	1.21391e+09		0.00200958	2.5e-07	3.55753			0.124676	0.518215
	06JY31_BF084R_Opx3.1	1.21783e+09		0.0020096	3.32e-07	3.56952			0.16557	0.529544
	06JY31_BF084R_Opx3.2	1.20812e+09		0.00200973	2.46e-07	3.63494			0.122681	0.517739
	06JY31_BF084R_Opx4.1	1.21792e+09		0.00200987	1.41e-07	3.70335			0.0703172	0.507885
	Session-190922
	BF064 & BF084
1	97SL65CPX Di (average, n=5)	2.0634e+09		0.0020249	1.21049e-06	4.87	-7.01661e-14	4.87		0.603675
	97SL65_Di1.1	2.05617e+09		0.00202401	5.22e-07	4.42932			0.260323	0.657413
	97SL65_Di2.1	2.08552e+09		0.00202507	2.85e-07	4.95486			0.14213	0.620182
	97SL65_Di3.1	2.05912e+09		0.00202488	6.68e-07	4.85809			0.333134	0.689494
	97SL65_Di4.1	2.06193e+09		0.00202484	3.82e-07	4.83973			0.190505	0.633021
	97SL65_Di5.1	2.05427e+09		0.0020257	4.53e-07	5.268			0.225913	0.644562
1	95AK24 (or UWC3) Di (average, n=28 out of 29)	2.11063e+09		0.00203766	1.05508e-06	11.2024	1.02244	10.18		0.526172
	UWC3_Di13.1	2.16375e+09		0.00203812	3.87e-07	11.43			0.192998	0.633776	high CPS
	UWC3_Di1.2	2.08339e+09		0.00203792	5.27e-07	11.3323			0.262817	0.658405
	UWC3_Di5.1	2.09038e+09		0.00203743	4.15e-07	11.0881			0.206962	0.638167
	UWC3_Di12.1	2.09636e+09		0.00203815	3.72e-07	11.4449			0.185518	0.631538
	UWC3_Di2.2	2.09172e+09		0.0020391	5.06e-07	11.9154			0.252344	0.654295	rejected (outlier)
	UWC3_Di10.1	2.11597e+09		0.0020381	2.44e-07	11.4206			0.121684	0.615817
	UWC3_Di3.1	2.10312e+09		0.00203726	3.65e-07	11.0027			0.182027	0.630522
	UWC3_Di9.1	2.11177e+09		0.0020378	4.94e-07	11.2702			0.246359	0.65201
	UWC3_Di4.1	2.08665e+09		0.00203722	3.11e-07	10.9814			0.155097	0.623281
	UWC3_Di8.1	2.10617e+09		0.00203735	4.07e-07	11.0484			0.202972	0.636884
	UWC3_BF084_Di1.1	2.11863e+09		0.00203773	2.09e-07	11.2375			0.104229	0.612607
	UWC3_BF084_Di2.1	2.11746e+09		0.00203764	3.39e-07	11.1933			0.16906	0.626901
	UWC3_BF084_Di3.1	2.12735e+09		0.00203665	5.4e-07	10.702			0.2693	0.661019
	UWC3_BF084_Di4.1	2.10714e+09		0.00203748	3.18e-07	11.1104			0.158588	0.624159
	UWC3_BF084_Di5.1	2.11663e+09		0.00203791	5.31e-07	11.3268			0.264811	0.659203
	UWC3_BF084_Di6.1	2.09712e+09		0.00203645	3.53e-07	10.6018			0.176042	0.62882
	UWC3_BF084_Di1.2	2.096e+09		0.00203653	2.83e-07	10.6434			0.141133	0.619954
	UWC3_BF084_Di2.2	2.10608e+09		0.00203776	6.93e-07	11.2504			0.345601	0.695604	large error
	UWC3_BF084_Di3.2	2.09327e+09		0.00203817	6.6e-07	11.4553			0.329144	0.687575
	UWC3_BF084_Di4.2	2.12932e+09		0.002038	5.79e-07	11.372			0.288749	0.669179
	UWC3_BF084_Di5.2	2.11749e+09		0.00203767	2.75e-07	11.2057			0.137143	0.619058
	UWC3_BF084_Di6.2	2.0972e+09		0.00203789	3.1e-07	11.3149			0.154598	0.623157
	UWC3_BF084_Di1.3	2.12731e+09		0.00203771	5.28e-07	11.2275			0.263315	0.658604
	UWC3_BF084_Di4.4	2.12142e+09		0.00203773	4.71e-07	11.235			0.234889	0.647763
	UWC3_BF084_Di5.4	2.12952e+09		0.00203762	3.55e-07	11.1809			0.17704	0.6291
	UWC3_BF084_Di6.4	2.11076e+09		0.00203775	6.66e-07	11.2484			0.332136	0.689013
	UWC3_BF084_Di5.5	2.11553e+09		0.00203803	4.95e-07	11.3829			0.246858	0.652199
	UWC3_BF084_Di6.5	2.10763e+09		0.0020375	3.25e-07	11.1233			0.162079	0.625055
	UWC3_BF084_Di5.6	2.12308e+09		0.00203751	2.45e-07	11.1253			0.122182	0.615916
1	06JY29CPX (average, n=5)	2.09034e+09		0.00202639	9.57309e-07	5.60704	0.15704	5.45		0.477413
	06JY29_BF084_Cpx10.1	2.09675e+09		0.0020268	3.2e-07	5.81338			0.159585	0.624413
	06JY29_BF084_Cpx11.1	2.09071e+09		0.00202652	2.97e-07	5.67493			0.148115	0.62158
	06JY29_BF084_Cpx7.1	2.07832e+09		0.00202657	1.28e-07	5.69924			0.063834	0.607041
	06JY29_BF084_Cpx8.1	2.08762e+09		0.00202556	3.13e-07	5.19703			0.156094	0.62353
	06JY29_BF084_Cpx9.1	2.09828e+09		0.00202647	3.75e-07	5.65061			0.187014	0.63198
1	06JY31CPX (average, n=5)	2.09704e+09		0.00202672	4.31821e-07	5.771	0.581003	5.19		0.21535
	06JY31_BF084_Cpx1.1	2.10713e+09		0.0020268	2.85e-07	5.8109			0.14213	0.620182
	06JY31_BF084_Cpx2.1	2.09629e+09		0.00202639	4.71e-07	5.61041			0.234889	0.647763
	06JY31_BF084_Cpx3.1	2.0989e+09		0.00202675	3.79e-07	5.78758			0.189009	0.632573
	06JY31_BF084_Cpx4.1	2.08947e+09		0.00202698	3.76e-07	5.90321			0.187512	0.632127
	06JY31_BF084_Cpx5.1	2.09343e+09		0.00202666	7.3e-07	5.74291			0.364053	0.704953	large error
1	13NQ124CPX (average, n=5)	2.08607e+09		0.00202686	9.23521e-07	5.84395	-0.176047	6.02		0.460563
	13NQ124_BF084_Cpx17.1	2.11012e+09		0.00202675	3.23e-07	5.78559			0.161081	0.624797
	13NQ124_BF084_Cpx2.1	2.08159e+09		0.00202669	4.94e-07	5.75979			0.246359	0.65201
	13NQ124_BF084_Cpx24.1	2.10143e+09		0.00202724	2.6e-07	6.03273			0.129663	0.617444
	13NQ124_BF084_Cpx25.1	2.09806e+09		0.00202739	4.92e-07	6.10617			0.245362	0.651634
	13NQ124_BF084_Cpx8.1	2.03914e+09		0.00202624	5.47e-07	5.53548			0.272791	0.662449	low CPS
1	2C42Cpx (average, n=5)	2.08119e+09		0.00202659	7.66138e-07	5.70847	0.0984747	5.61		0.382076
	2C42_BF084_Cpx11.1	2.07557e+09		0.00202628	2.29e-07	5.55434			0.114203	0.614383
	2C42_BF084_Cpx12.1	2.09009e+09		0.00202658	2.61e-07	5.7052			0.130162	0.617548
	2C42_BF084_Cpx13.1	2.06513e+09		0.00202724	3.91e-07	6.02925			0.194993	0.634387
	2C42_BF084_Cpx14.1	2.09378e+09		0.00202652	3.74e-07	5.67443			0.186515	0.631832
	2C42_BF084_Cpx16.1	2.08139e+09		0.00202633	2.67e-07	5.57915			0.133154	0.618186
1	2C47-2CPX (average, n=6)	2.08473e+09		0.00202714	8.98405e-07	5.98181	1.33181	4.65		0.448038
	2C47-2_BF084_Cpx1.1	2.09373e+09		0.00202697	1.75e-07	5.89874			0.0872731	0.609951
	2C47-2_BF084_Cpx2.1	2.07307e+09		0.00202664	2.46e-07	5.73299			0.122681	0.616015
	2C47-2_BF084_Cpx4.1	2.09678e+09		0.00202687	3.43e-07	5.84465			0.171055	0.627442
	2C47-2_BF084_Cpx5.1	2.0809e+09		0.00202757	1.74e-07	6.19252			0.0867744	0.60988
	2C47-2_BF084_Cpx6.1	2.07917e+09		0.00202766	2.31e-07	6.24016			0.1152	0.614569
1	NRM-AG1 Cpx (average, n=5)	2.15195e+09		0.00202998	7.41347e-07	7.39267	1.89267	5.5		0.369712
	NRM-AG1_Cpx1.2	2.15416e+09		0.00203056	2.32e-07	7.67831			0.115699	0.614663
	NRM-AG1_Cpx2.1	2.17429e+09		0.0020299	2.59e-07	7.34979			0.129164	0.617339
	NRM-AG1_Cpx3.1	2.14448e+09		0.00202973	4.01e-07	7.26741			0.19998	0.635937
	NRM-AG1_Cpx4.2	2.1633e+09		0.00203011	4.75e-07	7.455			0.236884	0.648489
	NRM-AG1_Cpx5.2	2.12352e+09		0.00202962	3.99e-07	7.21283			0.198983	0.635624
1	NSH4CPX (average, n=5)	2.12557e+09		0.00202746	6.98931e-07	6.14111	0.841111	5.3		0.348559	6.48?
	NSH4_BF084_Cpx1.2	2.1333e+09		0.00202707	5.81e-07	5.9439			0.289747	0.66961
	NSH4_BF084_Cpx2.2	2.14051e+09		0.00202746	2.61e-07	6.13893			0.130162	0.617548
	NSH4_BF084_Cpx3.1	2.12562e+09		0.00202725	2.73e-07	6.03322			0.136146	0.618837
	NSH4_BF084_Cpx4.1	2.09637e+09		0.00202756	8.33e-07	6.18855			0.41542	0.732801	large error; low CPS
	NSH4_BF084_Cpx5.1	2.13209e+09		0.00202799	3.51e-07	6.40095			0.175045	0.628542
1	NSH5CPX (average, n=5)	2.11281e+09		0.00202718	7.54927e-07	6.00007	0.930075	5.07		0.376485	5.88?
	NSH5_BF084_Cpx1.1	2.14152e+09		0.00202716	4.32e-07	5.99253			0.21544	0.640967
	NSH5_BF084_Cpx2.1	2.11878e+09		0.00202696	3.87e-07	5.8913			0.192998	0.633776
	NSH5_BF084_Cpx3.1	2.09643e+09		0.00202731	4.52e-07	6.06548			0.225414	0.644388
	NSH5_BF084_Cpx4.1	2.09085e+09		0.00202773	2.53e-07	6.27341			0.126172	0.61672
	NSH5_BF084_Cpx5.1	2.11644e+09		0.00202673	3.81e-07	5.77765			0.190006	0.632871
1	NSH6CPX (average, n=5)	2.12194e+09		0.00202726	8.54865e-07	6.04166	0.871661	5.17		0.426324	6.09?
	NSH6_BF084_Cpx1.1	2.15111e+09		0.002027	2.61e-07	5.91363			0.130162	0.617548
	NSH6_BF084_Cpx2.1	2.14405e+09		0.0020267	4.72e-07	5.76475			0.235388	0.647944
	NSH6_BF084_Cpx3.2	2.1124e+09		0.00202727	4.88e-07	6.04414			0.243367	0.650885
	NSH6_BF084_Cpx4.1	2.08324e+09		0.00202778	3.84e-07	6.29723			0.191502	0.633322
	NSH6_BF084_Cpx5.1	2.11887e+09		0.00202756	8.31e-07	6.18855			0.414423	0.732236	large error
1	NSH7CPX (average, n=5)	2.12073e+09		0.00202807	1.33452e-06	6.44413	1.42413	5.02		0.665532
	NSH7_BF084_Cpx1.2	2.15024e+09		0.00202788	4.43e-07	6.34636			0.220926	0.642831
	NSH7_BF084_Cpx2.2	2.09714e+09		0.00202795	4.21e-07	6.38457			0.209954	0.639144
	NSH7_BF084_Cpx3.1	2.13253e+09		0.00202865	7.38e-07	6.73096			0.368043	0.707022	large error
	NSH7_BF084_Cpx4.1	2.12626e+09		0.00202712	1.77e-07	5.9702			0.0882705	0.610095
	NSH7_BF084_Cpx5.2	2.09748e+09		0.00202877	3.4e-07	6.78853			0.169559	0.627036
1	NSH9CPX (average, n=5)	2.05575e+09		0.00202754	2.28197e-06	6.18101	1.03101	5.15		1.13803	5.33?
	NSH9_BF084_Cpx1.1	2.01022e+09		0.00202784	8.83e-07	6.328			0.440355	0.747219	large error
	NSH9_BF084_Cpx2.1	2.10016e+09		0.00202617	5.53e-07	5.49876			0.275783	0.663687
	NSH9_BF084_Cpx4.1	2.03279e+09		0.00202899	2.47e-07	6.89919			0.12318	0.616115
	NSH9_BF084_Cpx5.1	2.03949e+09		0.00202663	5.65e-07	5.72703			0.281767	0.666196
	NSH9_BF084_Cpx6.1	2.09611e+09		0.00202809	1.61e-07	6.45207			0.0802912	0.608992
1	QJH01-1OMP (average, n=5)	2.09911e+09		0.00202321	1.03999e-06	4.03242	0.492419	3.54		0.518645
	QJH01-1_Omp11.1	2.10459e+09		0.00202307	1.98e-07	3.95987			0.0987433	0.611698
	QJH01-1_Omp6.1	2.11122e+09		0.00202316	2.64e-07	4.00403			0.131658	0.617866
	QJH01-1_Omp7.1	2.10083e+09		0.00202254	2.56e-07	3.69635			0.127668	0.617028
	QJH01-1_Omp8.1	2.10224e+09		0.00202333	4.66e-07	4.08989			0.232396	0.646863
	QJH01-1_Omp9.1	2.07665e+09		0.00202398	2.54e-07	4.41196			0.126671	0.616822	low CPS
1	QLP08-1OMP (average, n=5)	2.05997e+09		0.00199791	9.92541e-07	-8.52207	-0.912073	-7.61		0.494983
	QLP08-1_Omp10.1	2.05786e+09		0.00199817	8.59e-07	-8.39394			0.428386	0.740229	large error
	QLP08-1_Omp5.1	2.03614e+09		0.00199806	6.7e-07	-8.45101			0.334131	0.689977
	QLP08-1_Omp6.1	2.08563e+09		0.0019982	1.93e-07	-8.37806			0.0962498	0.6113
	QLP08-1_Omp7.1	2.05217e+09		0.00199703	3.24e-07	-8.95967			0.16158	0.624926
	QLP08-1_Omp9.1	2.06807e+09		0.00199811	5.63e-07	-8.42769			0.28077	0.665775
1	97M44OPX (average, n=4 out of 5)	2.09159e+09		0.00202894	9.66319e-07	6.87301	-1.11699	7.99		0.481906
	97M44_Opx10.1	2.09582e+09		0.00202915	5.12e-07	6.98058			0.255336	0.655454
	97M44_Opx12.1	2.11777e+09		0.00202892	3.86e-07	6.86197			0.1925	0.633625
	97M44_Opx13.1	2.08789e+09		0.00202828	2.97e-07	6.54536			0.148115	0.62158
	97M44_Opx14.1	2.05288e+09		0.00203084	2.69e-07	7.81727			0.134151	0.618402	outlier; rejected
	97M44_Opx15.1	2.06491e+09		0.0020294	3.45e-07	7.10415			0.172053	0.627715
1	06JY31OPX (average, n=5)	2.04818e+09		0.00202284	3.51307e-07	3.84682	-1.69318	5.54		0.175198
	06JY31_BF084_Opx1.2	2.04066e+09		0.00202265	3.88e-07	3.75144			0.193497	0.633928
	06JY31_BF084_Opx2.1	2.05148e+09		0.00202309	2.7e-07	3.96979			0.13465	0.61851
	06JY31_BF084_Opx2.2	2.05043e+09		0.00202293	4.2e-07	3.89039			0.209455	0.63898
	06JY31_BF084_Opx3.1	2.05192e+09		0.00202271	3.91e-07	3.78171			0.194993	0.634387
	06JY31_BF084_Opx4.1	2.04641e+09		0.00202283	2e-07	3.84076			0.0997407	0.61186
1	06JY34OPX (average, n=5)	2.02789e+09		0.00202331	1.61952e-06	4.07847	-1.56153	5.64		0.807658
	06JY34_BF084_Opx1.1	2.02436e+09		0.0020231	4.48e-07	3.97823			0.223419	0.643693
	06JY34_BF084_Opx2.1	2.0269e+09		0.00202421	3.33e-07	4.52907			0.166068	0.626101
	06JY34_BF084_Opx3.1	2.03292e+09		0.00202209	2.81e-07	3.47552			0.140136	0.619727
	06JY34_BF084_Opx4.1	1.999e+09		0.00202384	4.47e-07	4.34149			0.22292	0.64352
	06JY34_BF084_Opx5.1	2.05627e+09		0.00202329	6.23e-07	4.06805			0.310692	0.678936
1	NRM-EN2 Opx (average, n=10)	2.03507e+09		0.00202369	9.08515e-07	4.267	-1.333	5.6		0.453079
	NRM-EN2_BF084_En1.1	1.97761e+09		0.0020237	4.09e-07	4.27449			0.20397	0.637203
	NRM-EN2_BF084_En1.2	2.07665e+09		0.00202374	1.28e-07	4.29335			0.063834	0.607041
	NRM-EN2_BF084_En2.1	2.00138e+09		0.00202292	4.12e-07	3.88741			0.205466	0.637683
	NRM-EN2_BF084_En2.2	2.02161e+09		0.00202367	5.34e-07	4.2606			0.266308	0.659806
	NRM-EN2_BF084_En3.1	2.07222e+09		0.00202336	3.49e-07	4.10626			0.174047	0.628265
	NRM-EN2_Opx1.1	2.04377e+09		0.00202353	5.21e-07	4.19211			0.259824	0.657216
	NRM-EN2_Opx1.2	2.04478e+09		0.00202345	1.13e-07	4.15192			0.0563535	0.6063
	NRM-EN2_Opx2.1	2.00557e+09		0.00202458	2.09e-07	4.71021			0.104229	0.612607
	NRM-EN2_Opx2.2	2.05511e+09		0.00202422	3.5e-07	4.53403			0.174546	0.628403
	NRM-EN2_Opx2.3	2.05198e+09		0.00202367	5.24e-07	4.2596			0.261321	0.657809
	Session-190930
	BF064 & BF084
1	97SL65CPX Di (average, n=10)	1.28359e+09		0.00204282	6.96421e-07	4.87	-7.01661e-14	4.87		0.347308
	97SL65_Di1.1	1.29582e+09		0.00204315	3.21e-07	5.03518			0.160084	0.382426
	97SL65_Di3.1	1.3115e+09		0.00204244	6.81e-07	4.68642			0.339617	0.485759
	97SL65_Di4.1	1.30087e+09		0.00204247	8.29e-07	4.69823			0.413425	0.539947
	97SL65_Di5.1	1.30228e+09		0.0020435	2.86e-07	5.20636			0.142629	0.375454
	97SL65_Di6.1	1.31486e+09		0.00204309	6.65e-07	5.00518			0.331638	0.480215
	97SL65_BF084_Di11.1	1.25624e+09		0.00204282	3.55e-07	4.8699			0.17704	0.389828
	97SL65_BF084_Di12.1	1.27014e+09		0.00204248	2.05e-07	4.70364			0.102234	0.362042
	97SL65_BF084_Di13.1	1.26547e+09		0.0020429	1.069e-06	4.91073			0.533114	0.636265	large error
	97SL65_BF084_Di14.1	1.25996e+09		0.0020427	3.74e-07	4.81087			0.186515	0.394221
	97SL65_BF084_Di15.1	1.25875e+09		0.00204262	5.12e-07	4.77349			0.255336	0.431067
1	95AK24 (or UWC3) Di (average, n=43 out of 44)	1.3126e+09		0.0020543	8.16664e-07	10.5205	0.340463	10.18		0.407273
	UWC3_Di3.1	1.35678e+09		0.00205455	4.25e-07	10.6424			0.211949	0.406872
	UWC3_Di1.1	1.35222e+09		0.00205441	3.1e-07	10.574			0.154598	0.380162
	UWC3_Di4.1	1.36607e+09		0.00205348	5.25e-07	10.118			0.261819	0.434939
	UWC3_Di5.1	1.37813e+09		0.00205404	6.56e-07	10.3915			0.327149	0.477126
	UWC3_Di6.1	1.3625e+09		0.00205459	3.77e-07	10.6611			0.188011	0.394931
	UWC3_Di7.1	1.36053e+09		0.00205509	9e-08	10.9095			0.0448833	0.350196
	UWC3_Di1.2	1.35682e+09		0.0020543	2.93e-07	10.5199			0.14612	0.376794
	UWC3_Di8.1	1.34776e+09		0.00205395	2.09e-07	10.3473			0.104229	0.36261
	UWC3_Di1.3	1.36106e+09		0.00205455	3.66e-07	10.6414			0.182525	0.392349
	UWC3_Di9.1	1.35169e+09		0.00205474	3.42e-07	10.7339			0.170557	0.386926
	UWC3_Di1.4	1.32789e+09		0.00205452	4.83e-07	10.6267			0.240874	0.422661
	UWC3_Di10.1	1.32945e+09		0.00205472	5.74e-07	10.7275			0.286256	0.450072
	UWC3_Di1.5	1.33324e+09		0.00205459	3.17e-07	10.6611			0.158089	0.381595
	UWC3_Di3.2	1.32529e+09		0.00205424	3.91e-07	10.4914			0.194993	0.398302
	UWC3_Di1.6	1.32336e+09		0.00205463	4.78e-07	10.6832			0.23838	0.421245
	UWC3_Di4.2	1.32351e+09		0.00205447	3.46e-07	10.6011			0.172551	0.38781
	UWC3_Di1.7	1.33329e+09		0.00205484	1.47e-07	10.7831			0.0733094	0.35496
	UWC3_BF084_Di1.1	1.309e+09		0.00205395	5.8e-07	10.3453			0.289248	0.451981
	UWC3_BF084_Di2.1	1.30558e+09		0.00205427	6.77e-07	10.5037			0.337622	0.484367
	UWC3_BF084_Di3.1	1.32125e+09		0.00205377	2.84e-07	10.2572			0.141632	0.375076
	UWC3_BF084_Di4.1	1.32425e+09		0.00205369	3.99e-07	10.2169			0.198983	0.400271
	UWC3_BF084_Di5.1	1.31456e+09		0.0020539	1.27e-07	10.3227			0.0633353	0.353035
	UWC3_BF084_Di6.1	1.31705e+09		0.00205362	3.98e-07	10.1869			0.198484	0.400023
	UWC3_BF084_Di1.2	1.31059e+09		0.00205411	4.87e-07	10.425			0.242869	0.423801
	UWC3_BF084_Di2.2	1.29941e+09		0.00205413	6.62e-07	10.4343			0.330142	0.479183
	UWC3_BF084_Di3.2	1.29682e+09		0.00205383	4.08e-07	10.2872			0.203471	0.402521
	UWC3_BF084_Di4.2	1.30956e+09		0.00205419	3.26e-07	10.4673			0.162577	0.383476
	UWC3_BF084_Di5.2	1.30401e+09		0.00205403	4.61e-07	10.3841			0.229902	0.416506
	UWC3_BF084_Di6.2	1.29154e+09		0.00205442	6.08e-07	10.5799			0.303212	0.461042
	UWC3_BF084_Di1.3	1.28801e+09		0.00205444	2.72e-07	10.5878			0.135647	0.372858
	UWC3_BF084_Di2.3	1.30092e+09		0.00205407	2.01e-07	10.4043			0.100239	0.361484
	UWC3_BF084_Di3.3	1.30106e+09		0.00205416	4.34e-07	10.4515			0.216437	0.409228
	UWC3_BF084_Di4.3	1.29295e+09		0.0020543	3.95e-07	10.5194			0.196988	0.399283
	UWC3_BF084_Di5.3	1.28332e+09		0.00205294	9.44e-07	9.84797			0.470776	0.585024	large error/outlier? Rejected
	UWC3_BF084_Di6.3	1.28428e+09		0.00205379	3.74e-07	10.269			0.186515	0.394221
	UWC3_BF084_Di1.4	1.26239e+09		0.00205484	3.2e-07	10.7855			0.159585	0.382217
	UWC3_BF084_Di2.4	1.27326e+09		0.00205531	4.1e-07	11.0162			0.204468	0.403026
	UWC3_BF084_Di4.4	1.27619e+09		0.00205427	2.53e-07	10.5052			0.126172	0.369516
	UWC3_BF084_Di5.4	1.27296e+09		0.00205491	3.83e-07	10.8185			0.191003	0.396365
	UWC3_BF084_Di6.4	1.26768e+09		0.00205374	3.15e-07	10.241			0.157092	0.381183
	UWC3_BF084_Di5.5	1.25301e+09		0.00205471	7.71e-07	10.7186			0.3845	0.518134
	UWC3_BF084_Di5.6	1.25399e+09		0.00205432	3.21e-07	10.5298			0.160084	0.382426
	UWC3_BF084_Di5.7	1.25594e+09		0.00205411	2.26e-07	10.426			0.112707	0.365138
	UWC3_BF084_Di5.8	1.26582e+09		0.00205443	4.11e-07	10.5834			0.204967	0.403279
1	NRM-AG1 Cpx (average, n=10)	1.38498e+09		0.00204658	1.32349e-06	6.7203	1.2203	5.5		0.660027
	NRM-AG1_Cpx1.1	1.39118e+09		0.00204772	4.14e-07	7.28122			0.206463	0.404042
	NRM-AG1_Cpx1.2	1.39216e+09		0.00204642	3.27e-07	6.64469			0.163076	0.383688
	NRM-AG1_Cpx2.1	1.394e+09		0.00204605	4.98e-07	6.46023			0.248354	0.426969
	NRM-AG1_Cpx2.2	1.40149e+09		0.00204633	6.26e-07	6.60091			0.312188	0.466995
	NRM-AG1_Cpx3.1	1.38323e+09		0.0020477	3.14e-07	7.27384			0.156593	0.380978
	NRM-AG1_Cpx3.2	1.39092e+09		0.00204631	4.77e-07	6.58714			0.237882	0.420963
	NRM-AG1_Cpx4.1	1.38007e+09		0.00204567	3.1e-07	6.27478			0.154598	0.380162
	NRM-AG1_Cpx4.2	1.36946e+09		0.00204631	4.22e-07	6.59009			0.210453	0.406095
	NRM-AG1_Cpx5.1	1.36647e+09		0.00204678	3.7e-07	6.81784			0.18452	0.393281
	NRM-AG1_Cpx5.2	1.38084e+09		0.00204648	3.81e-07	6.67224			0.190006	0.395885
1	06JY29CPX (average, n=6)	1.27628e+09		0.00204289	6.9259e-07	4.90802	-0.541976	5.45		0.345397
	06JY29_BF084_Cpx2.1	1.28429e+09		0.00204336	2.98e-07	5.1375			0.148614	0.377768
	06JY29_BF084_Cpx3.1	1.27223e+09		0.00204315	8.64e-07	5.03223			0.43088	0.553426
	06JY29_BF084_Cpx4.1	1.27309e+09		0.00204306	5.67e-07	4.98943			0.282765	0.44786
	06JY29_BF084_Cpx5.1	1.27464e+09		0.00204264	3.54e-07	4.78283			0.176541	0.389601
	06JY29_BF084_Cpx6.1	1.28257e+09		0.00204246	2.98e-07	4.69528			0.148614	0.377768
	06JY29_BF084_Cpx11.1	1.27088e+09		0.0020427	4.74e-07	4.81087			0.236385	0.42012
1	06JY31CPX (average, n=5)	1.28411e+09		0.00204282	4.46857e-07	4.87256	-0.317442	5.19		0.222849
	06JY31_BF084_Cpx1.1	1.28874e+09		0.00204282	7.45e-07	4.87236			0.371534	0.508586
	06JY31_BF084_Cpx2.1	1.28683e+09		0.00204318	2.91e-07	5.04846			0.145123	0.376408
	06JY31_BF084_Cpx3.1	1.27882e+09		0.00204284	4.36e-07	4.88269			0.217435	0.409757
	06JY31_BF084_Cpx4.1	1.28466e+09		0.00204264	4.01e-07	4.78087			0.19998	0.400768
	06JY31_BF084_Cpx5.1	1.2815e+09		0.00204263	4.62e-07	4.77841			0.230401	0.416782
1	13NQ124CPX (average, n=6)	1.252e+09		0.00204358	6.36275e-07	5.24719	-0.772808	6.02		0.317313
	13NQ124_BF084_Cpx2.1	1.24509e+09		0.00204381	5.25e-07	5.35836			0.261819	0.434939
	13NQ124_BF084_Cpx11.1	1.25126e+09		0.00204375	5.6e-07	5.32934			0.279274	0.445664
	13NQ124_BF084_Cpx15.1	1.2547e+09		0.00204385	3.18e-07	5.38099			0.158588	0.381802
	13NQ124_BF084_Cpx16.1	1.25703e+09		0.00204373	1.108e-06	5.31704			0.552563	0.652648	large error
	13NQ124_BF084_Cpx24.1	1.25834e+09		0.00204324	2.67e-07	5.07847			0.133154	0.371958
	13NQ124_BF084_Cpx25.1	1.24556e+09		0.00204312	1.26e-06	5.01895			0.628366	0.71796	large error
1	2C42CPX (average, n=6)	1.25089e+09		0.00204338	1.16243e-06	5.14963	-0.460369	5.61		0.579707
	2C42_BF084_Cpx11.1	1.23797e+09		0.00204265	6.14e-07	4.79021			0.306204	0.463016
	2C42_BF084_Cpx12.1	1.25071e+09		0.00204375	4.06e-07	5.33032			0.202474	0.402018
	2C42_BF084_Cpx13.1	1.24782e+09		0.00204272	5.7e-07	4.8212			0.284261	0.448806
	2C42_BF084_Cpx14.1	1.25655e+09		0.00204337	7.08e-07	5.14389			0.353082	0.495267
	2C42_BF084_Cpx15.1	1.25772e+09		0.00204378	6.33e-07	5.34508			0.315679	0.469336
	2C42_BF084_Cpx16.1	1.25457e+09		0.00204403	5.74e-07	5.46707			0.286256	0.450072
1	2C47-2CPX (average, n=6)	1.25655e+09		0.00204357	6.87582e-07	5.24293	0.592929	4.65		0.342899
	2C47-2_BF084_Cpx1.1	1.25614e+09		0.00204402	3.11e-07	5.46117			0.155097	0.380365
	2C47-2_BF084_Cpx2.1	1.25456e+09		0.00204319	2.51e-07	5.05584			0.125175	0.369176
	2C47-2_BF084_Cpx3.1	1.2619e+09		0.00204344	6.49e-07	5.17833			0.323658	0.474739
	2C47-2_BF084_Cpx4.1	1.25582e+09		0.00204369	3.19e-07	5.30081			0.159086	0.382009
	2C47-2_BF084_Cpx5.1	1.2572e+09		0.00204322	4.15e-07	5.06863			0.206962	0.404297
	2C47-2_BF084_Cpx6.1	1.25368e+09		0.00204388	4.29e-07	5.3928			0.213944	0.407915
1	NSH4CPX (average, n=4)	1.33179e+09		0.00204332	1.02536e-06	5.1177	-0.182302	5.3		0.511351	6.48?
	NSH4_BF084_Cpx1.2	1.32803e+09		0.00204367	3.5e-07	5.2895			0.174546	0.388702
	NSH4_BF084_Cpx2.2	1.33032e+09		0.00204382	4.52e-07	5.36574			0.225414	0.414046
	NSH4_BF084_Cpx4.1	1.34214e+09		0.00204305	3.79e-07	4.98402			0.189009	0.395407
	NSH4_BF084_Cpx5.1	1.32666e+09		0.00204274	4.8e-07	4.83153			0.239378	0.421811
1	NSH5CPX (average, n=5)	1.32418e+09		0.00204303	1.09864e-06	4.97664	-0.0933552	5.07		0.547895	5.88?
	NSH5_BF084_Cpx1.1	1.32078e+09		0.00204291	5.07e-07	4.91466			0.252843	0.429595
	NSH5_BF084_Cpx2.1	1324054539		0.00204326	3.07e-07	5.08978			0.153102	0.379556
	NSH5_BF084_Cpx3.1	1.3302e+09		0.00204215	7.6e-07	4.54328			0.379015	0.514076
	NSH5_BF084_Cpx4.1	1.32269e+09		0.00204325	7.05e-07	5.0824			0.351586	0.494202
	NSH5_BF084_Cpx5.1	1.32321e+09		0.0020436	3.95e-07	5.2531			0.196988	0.399283
1	NSH6CPX (average, n=5)	1.32295e+09		0.00204295	5.66993e-07	4.93542	-0.234577	5.17		0.282761	6.09?
	NSH6_BF084_Cpx1.1	1.29046e+09		0.00204262	5.46e-07	4.77496			0.272292	0.441322
	NSH6_BF084_Cpx2.1	1.31496e+09		0.00204276	3.69e-07	4.84137			0.184022	0.393048
	NSH6_BF084_Cpx3.2	1.33363e+09		0.00204304	4.94e-07	4.98156			0.246359	0.425812
	NSH6_BF084_Cpx4.1	1.33454e+09		0.00204336	7.9e-07	5.13799			0.393976	0.525204
	NSH6_BF084_Cpx5.1	1.34113e+09		0.00204296	2.96e-07	4.94123			0.147616	0.377377
1	NSH7CPX (average, n=5)	1.34731e+09		0.00204381	4.52184e-07	5.36072	0.340724	5.02		0.225506
	NSH7_BF084_Cpx1.1	1.35338e+09		0.00204388	5.85e-07	5.39476			0.291741	0.453581
	NSH7_BF084_Cpx2.1	1.34795e+09		0.00204388	6.53e-07	5.39329			0.325653	0.476102
	NSH7_BF084_Cpx3.1	1.34668e+09		0.00204362	2.93e-07	5.26687			0.14612	0.376794
	NSH7_BF084_Cpx4.1	1.3425e+09		0.00204412	2.03e-07	5.51233			0.101237	0.361762
	NSH7_BF084_Cpx5.2	1.34602e+09		0.00204356	3.6e-07	5.23637			0.179533	0.390966
1	NSH9CPX (average, n=6)	1.33493e+09		0.00204303	6.02567e-07	4.97435	-0.175651	5.15		0.300502	5.33?
	NSH9_BF084_Cpx1.1	1.33981e+09		0.00204312	6.59e-07	5.02141			0.328646	0.478153
	NSH9_BF084_Cpx2.1	1.32922e+09		0.00204287	4.35e-07	4.89892			0.216936	0.409492
	NSH9_BF084_Cpx3.1	1.33408e+09		0.00204326	3.7e-07	5.08978			0.18452	0.393281
	NSH9_BF084_Cpx4.1	1.33138e+09		0.0020425	4.77e-07	4.71495			0.237882	0.420963
	NSH9_BF084_Cpx5.1	1.33766e+09		0.00204309	1.96e-07	5.0037			0.0977459	0.3608
	NSH9_BF084_Cpx6.1	1.33743e+09		0.00204332	1.68e-07	5.11733			0.0837822	0.35727
1	QJH01-1OMP (average, n=10)	1.32137e+09		0.00203983	8.52907e-07	3.40142	-0.13858	3.54		0.425347
	QJH01-1_Omp1.1	1.34146e+09		0.00203917	5.52e-07	3.07691			0.275284	0.443175
	QJH01-1_Omp2.1	1.34232e+09		0.0020401	4.37e-07	3.53635			0.217933	0.410021
	QJH01-1_Omp3.1	1.34593e+09		0.00203941	6.51e-07	3.19202			0.324656	0.47542
	QJH01-1_Omp4.1	1.34464e+09		0.00204023	4.7e-07	3.59931			0.234391	0.419001
	QJH01-1_Omp6.1	1.35361e+09		0.0020393	4.49e-07	3.14283			0.223918	0.413233
	QJH01-1_BF084_Omp1.1	1.29633e+09		0.0020397	3.33e-07	3.3391			0.166068	0.384969
	QJH01-1_BF084_Omp2.1	1.30132e+09		0.00203994	5.08e-07	3.45617			0.253341	0.429889
	QJH01-1_BF084_Omp3.1	1.30002e+09		0.00204024	2.93e-07	3.60079			0.14612	0.376794
	QJH01-1_BF084_Omp4.1	1.30011e+09		0.00204039	5.9e-07	3.67703			0.294235	0.455189
	QJH01-1_BF084_Omp5.1	1.28795e+09		0.00203981	3.68e-07	3.3937			0.183523	0.392814
1	QLP08-1OMP (average, n=10)	1.29691e+09		0.00201437	1.54968e-06	-9.12482	-1.51482	-7.61		0.772831
	QLP08-1_Omp1.1	1.32564e+09		0.00201486	4.68e-07	-8.87931			0.233393	0.418443
	QLP08-1_Omp2.1	1.33625e+09		0.00201501	3.78e-07	-8.8075			0.18851	0.395169
	QLP08-1_Omp3.1	1.32992e+09		0.00201325	3.24e-07	-9.67325			0.16158	0.383054
	QLP08-1_Omp4.1	1.3223e+09		0.00201354	4.39e-07	-9.5301			0.218931	0.410552
	QLP08-1_Omp5.1	1.32958e+09		0.00201446	2.11e-07	-9.08001			0.105226	0.362898
	QLP08-1_BF084_Omp10.1	1.25729e+09		0.00201497	6.47e-07	-8.82963			0.322661	0.47406
	QLP08-1_BF084_Omp11.1	1.27434e+09		0.00201521	3.79e-07	-8.7101			0.189009	0.395407
	QLP08-1_BF084_Omp12.1	1.26801e+09		0.00201473	4.02e-07	-8.94425			0.200479	0.401017
	QLP08-1_BF084_Omp13.1	1.26695e+09		0.00201452	4.81e-07	-9.05099			0.239876	0.422094
	QLP08-1_BF084_Omp14.1	1.2588e+09		0.00201311	7.63e-07	-9.7431			0.380511	0.51518
1	97M44OPX (average, n=10)	1.31534e+09		0.00204584	1.33806e-06	6.3556	-1.6344	7.99		0.667297
	97M44_Opx9.1	1.32865e+09		0.0020456	4.26e-07	6.24133			0.212448	0.407132
	97M44_Opx12.1	1.33291e+09		0.00204614	4.07e-07	6.50598			0.202972	0.402269
	97M44_Opx13.1	1.32775e+09		0.00204518	2.54e-07	6.03276			0.126671	0.369686
	97M44_Opx14.1	1.33209e+09		0.00204673	4.47e-07	6.79521			0.22292	0.412694
	97M44_Opx15.1	1.34498e+09		0.00204711	2.11e-07	6.98017			0.105226	0.362898
	97M44_BF084_Opx1.1	1.29516e+09		0.00204557	5.13e-07	6.22657			0.255835	0.431363
	97M44_BF084_Opx2.1	1.29756e+09		0.00204501	6.15e-07	5.94766			0.306703	0.463345
	97M44_BF084_Opx3.1	1.30093e+09		0.00204604	6.09e-07	6.4558			0.30371	0.46137
	97M44_BF084_Opx4.1	1.29891e+09		0.00204552	7.58e-07	6.19903			0.378017	0.513342
	97M44_BF084_Opx6.1	1.29444e+09		0.00204546	1.87e-07	6.17148			0.0932575	0.35961
1	NRM-EN2 Opx (average, n=16)	1.34449e+09		0.00203938	6.20157e-07	3.18026	-2.41974	5.6		0.309275
	NRM-EN2_Opx1.1	1.33986e+09		0.00203929	8.64e-07	3.13643			0.43088	0.553426
	NRM-EN2_Opx1.2	1.33864e+09		0.00203905	3.71e-07	3.01739			0.185019	0.393516
	NRM-EN2_Opx1.3	1.34261e+09		0.00203931	5.46e-07	3.14529			0.272292	0.441322
	NRM-EN2_Opx2.1	1.34141e+09		0.00203907	4.13e-07	3.02575			0.205964	0.403787
	NRM-EN2_Opx2.11	1.35707e+09		0.00203964	2.11e-07	3.30614			0.105226	0.362898
	NRM-EN2_Opx2.12	1.34217e+09		0.00203969	4.56e-07	3.33024			0.227409	0.415135
	NRM-EN2_Opx2.2	1.33639e+09		0.00203923	6.02e-07	3.10544			0.300219	0.45908
	NRM-EN2_Opx2.3	1.34791e+09		0.00203905	4.96e-07	3.01542			0.247357	0.426389
	NRM-EN2_Opx2.4	1.34536e+09		0.00203995	3.35e-07	3.4601			0.167066	0.3854
	NRM-EN2_Opx2.5	1.35346e+09		0.00203954	2.26e-07	3.26039			0.112707	0.365138
	NRM-EN2_BF084_En1.1	1.29068e+09		0.00203951	7.77e-07	3.24268			0.387493	0.520359
	NRM-EN2_BF084_En1.3	1.28634e+09		0.00203938	1.7e-07	3.17775			0.0847796	0.357505
	NRM-EN2_BF084_En2.1	1.27979e+09		0.00204014	2.16e-07	3.55504			0.10772	0.363629
	NRM-EN2_BF084_En2.2	1.28555e+09		0.00203989	4.04e-07	3.43256			0.201476	0.401516
	NRM-EN2_BF084_En3.1	1.28453e+09		0.00203904	2.55e-07	3.01345			0.127169	0.369858
	NRM-EN2_BF084_En3.2	1.28482e+09		0.00203924	1.97e-07	3.11184			0.0982446	0.360936
1	06JY34OPX (average, n=6)	1.26418e+09		0.0020391	9.47067e-07	3.04158	-2.59842	5.64		0.472306
	06JY34_BF084_Opx1.1	1.26115e+09		0.00203941	5.52e-07	3.19448			0.275284	0.443175
	06JY34_BF084_Opx2.1	1.26497e+09		0.00203895	5.5e-07	2.96869			0.274287	0.442556
	06JY34_BF084_Opx3.1	1.2594e+09		0.00203893	3.46e-07	2.9559			0.172551	0.38781
	06JY34_BF084_Opx4.1	1.26996e+09		0.00203903	2.89e-07	3.00854			0.144125	0.376025
	06JY34_BF084_Opx5.1	1.2604e+09		0.00203844	4.94e-07	2.7193			0.246359	0.425812
	06JY34_BF084_Opx6.2	1.26921e+09		0.00203983	3.17e-07	3.40255			0.158089	0.381595
1	06JY31OPX (average, n=5)	1.2712e+09		0.00203905	6.23516e-07	3.01877	-2.52123	5.54		0.31095
	06JY31_BF084_Opx1.2	1.2678e+09		0.00203941	3.69e-07	3.19448			0.184022	0.393048
	06JY31_BF084_Opx2.1	1.2657e+09		0.00203872	7.76e-07	2.85457			0.386994	0.519987
	06JY31_BF084_Opx2.2	1.2722e+09		0.00203936	3.06e-07	3.16939			0.152603	0.379355
	06JY31_BF084_Opx3.1	1.27159e+09		0.00203886	3.22e-07	2.92344			0.160582	0.382635
	06JY31_BF084_Opx4.1	1.27869e+09		0.00203892	6.58e-07	2.95197			0.328147	0.477811
	Session-200908
	BF064
1	97SL65CPX Di (average, n=29 out of 30)	1.82203e+09		0.00203618	7.63458e-07	4.87	-7.01661e-14	4.87		0.380739
	97SL65_Z7067L_Di1.1	1.78596e+09		0.0020367	3.97e-07	5.12732			0.197985	0.429139
	97SL65_Z7067L_Di2.1	1.81263e+09		0.00203652	4.26e-07	5.0375			0.212448	0.436
	97SL65_Z7067L_Di3.1	1.81863e+09		0.00203615	2.91e-07	4.85688			0.145123	0.407459
	97SL65_Z7067L_Di8.1	1.78318e+09		0.00203589	2.07e-07	4.72709			0.103232	0.394486
	97SL65_Z7067L_Di9.1	1.82944e+09		0.00203662	4.28e-07	5.08685			0.213445	0.436487
	97SL65_Z7067L_Di1.2	1.82991e+09		0.00203666	5.27e-07	5.10758			0.262817	0.462639
	97SL65_Z7067L_Di2.2	1.84281e+09		0.0020357	2.6e-07	4.63431			0.129663	0.402212
	97SL65_Z7067L_Di4.1	1.85905e+09		0.00203584	7.96e-07	4.7034			0.396968	0.550042	large error
	97SL65_Z7067L_Di5.1	1.85716e+09		0.00203549	2.38e-07	4.53116			0.118691	0.398811
	97SL65_Z7067L_Di7.1	1.84018e+09		0.00203603	1.41e-07	4.7942			0.0703172	0.387178
	97SL65_Z7067L_Di3.2	1.8152e+09		0.00203652	1.22e-07	5.0375			0.0608418	0.38557
	97SL65_Z7067L_Di3.3	1.80783e+09		0.00203612	3.13e-07	4.84207			0.156094	0.411494
	97SL65_Z7067L_Di4.2	1.84508e+09		0.00203576	2.92e-07	4.66441			0.145621	0.407637
	97SL65_Z7067L_Di5.2	1.85772e+09		0.00203559	3.03e-07	4.57755			0.151107	0.409629
	97SL65_Z7067L_Di7.2	1.86597e+09		0.0020364	4.08e-07	4.97878			0.203471	0.431697
	97SL65_Z7067L_Di8.2	1.84753e+09		0.00203585	2.93e-07	4.70883			0.14612	0.407815
	97SL65_Di1.1	1.76924e+09		0.00203775	6.5e-07	5.64304			0.324157	0.50004	rejected
	97SL65_Di2.1	1.83886e+09		0.0020368	3e-07	5.1747			0.149611	0.409079
	97SL65_Di3.1	1.82121e+09		0.00203623	2.72e-07	4.89389			0.135647	0.404181
	97SL65_Di4.1	1.82384e+09		0.00203603	3.26e-07	4.79865			0.162577	0.413997
	97SL65_Di5.1	1.81628e+09		0.00203606	5.18e-07	4.81246			0.258328	0.460104
	97SL65_Di6.1	1.82289e+09		0.00203607	2.11e-07	4.81444			0.105226	0.395012
	97SL65_Di7.1	1.80916e+09		0.002036	3.37e-07	4.7794			0.168063	0.416182
	97SL65_Di8.1	1.78802e+09		0.00203705	2.23e-07	5.29758			0.111211	0.396649
	97SL65_Di9.1	1.81996e+09		0.00203643	2.13e-07	4.99111			0.106224	0.395279
	97SL65_Di10.1	1.83021e+09		0.00203605	5.44e-07	4.80555			0.271295	0.467507
	97SL65_Di11.1	1.78141e+09		0.00203631	3.49e-07	4.93633			0.174047	0.418634
	97SL65_Di12.1	1.80317e+09		0.00203648	2.22e-07	5.01826			0.110712	0.396509
	97SL65_Di13.1	1.7853e+09		0.00203582	1.86e-07	4.69501			0.0927588	0.391876
	97SL65_Di14.1	1.80042e+09		0.00203603	4.1e-07	4.79717			0.204468	0.432168
1	NRM-AG1 Cpx (average, n=10)	1.8692e+09		0.00204157	9.84019e-07	7.53223	2.03223	5.5		0.490734
	AG1_Cpx1.1	1.78493e+09		0.00204243	3.77e-07	7.95709			0.188011	0.42463
	AG1_Cpx1.2	1.85867e+09		0.00204162	4.63e-07	7.5539			0.2309	0.445283
	AG1_Cpx2.1	1.86645e+09		0.00204154	3.32e-07	7.51639			0.16557	0.415181
	AG1_Cpx2.2	1.88168e+09		0.00204111	2.73e-07	7.30221			0.136146	0.404349
	AG1_Cpx3.1	1.83927e+09		0.00204234	2.12e-07	7.90873			0.105725	0.395146
	AG1_Cpx3.2	1.8892e+09		0.00204156	6.02e-07	7.52577			0.300219	0.484865
	AG1_Cpx4.1	1.88641e+09		0.00204149	6.12e-07	7.49073			0.305206	0.487968
	AG1_Cpx4.2	1.90005e+09		0.00204149	5.51e-07	7.48826			0.274786	0.469542
	AG1_Cpx5.1	1.89207e+09		0.00204134	4.01e-07	7.41868			0.19998	0.430063
	AG1_Cpx5.2	1.89331e+09		0.00204082	2.9e-07	7.16057			0.144624	0.407282
1	QJH01-1OMP (average, n=10)	1.82925e+09		0.00203391	9.23457e-07	3.74974	0.209745	3.54		0.460531
	QJH01-1_Omp5.1	1.85835e+09		0.0020334	2.33e-07	3.49875			0.116198	0.398076
	QJH01-1_Omp6.1	1.84958e+09		0.0020335	1.26e-07	3.54711			0.0628366	0.385889
	QJH01-1_Omp7.1	1.84384e+09		0.00203379	1.84e-07	3.68875			0.0917614	0.391641
	QJH01-1_Omp8.1	1.82093e+09		0.00203429	4.77e-07	3.93599			0.237882	0.448943
	QJH01-1_Omp9.1	1.77754e+09		0.0020346	4.33e-07	4.09145			0.215939	0.437712
	QJH01-1_Omp10.1	1.82943e+09		0.00203386	1.53e-07	3.72477			0.0763016	0.388309
	QJH01-1_Omp11.1	1.86152e+09		0.00203341	4.22e-07	3.50269			0.210453	0.435032
	QJH01-1_Omp12.1	1.82045e+09		0.0020337	1.87e-07	3.64828			0.0932575	0.391994
	QJH01-1_Omp13.1	1.81687e+09		0.00203389	1.78e-07	3.74106			0.0887692	0.39095
	QJH01-1_Omp14.1	1.81402e+09		0.00203466	2.93e-07	4.11859			0.14612	0.407815
1	QLP08-1OMP (average, n=9 out of 10)	1.81005e+09		0.00200877	1.01624e-06	-8.6553	-1.0453	-7.61		0.506803
	QLP08-1_Omp1.1	1.79051e+09		0.00200909	2.09e-07	-8.5004			0.104229	0.394748
	QLP08-1_Omp2.1	1.69944e+09		0.00201014	1.06e-07	-7.98271			0.0528626	0.384391	low CPS; rejected
	QLP08-1_Omp3.1	1.78265e+09		0.00200916	1.97e-07	-8.46486			0.0982446	0.39321
	QLP08-1_Omp4.1	1.81307e+09		0.00200791	6.53e-07	-9.08224			0.325653	0.501011
	QLP08-1_Omp5.1	1.80502e+09		0.00200923	5.93e-07	-8.42884			0.295731	0.482099
	QLP08-1_Omp6.1	1.82293e+09		0.00200884	5.39e-07	-8.6218			0.268801	0.466065
	QLP08-1_Omp7.1	1.82313e+09		0.00200798	1.79e-07	-9.04819			0.0892679	0.391064
	QLP08-1_Omp8.1	1.82275e+09		0.00200889	1.81e-07	-8.5991			0.0902653	0.391293
	QLP08-1_Omp9.1	1.81109e+09		0.00200865	2.95e-07	-8.71408			0.147117	0.408174
	QLP08-1_Omp10.1	1.81926e+09		0.00200921	1.36e-07	-8.43821			0.0678237	0.386733
1	95AK24 (or UWC3) Di (average, n=10)	1.82519e+09		0.00204919	8.76074e-07	11.2898	1.10975	10.18		0.436901
	UWC3_Di1.2	1.84277e+09		0.00204875	1.44e-07	11.0716			0.0718133	0.387452
	UWC3_Di2.2	1.84464e+09		0.00204931	2.9e-07	11.3505			0.144624	0.407282
	UWC3_Di3.1	1.78624e+09		0.00204921	4.05e-07	11.2986			0.201975	0.430994
	UWC3_Di4.1	1.83665e+09		0.00204911	4.41e-07	11.2498			0.219928	0.439694
	UWC3_Di6.1	1.83966e+09		0.0020491	4.83e-07	11.2463			0.240874	0.450536
	UWC3_Di7.1	1.82907e+09		0.00204915	3.11e-07	11.2705			0.155097	0.411117
	UWC3_Di8.1	1.84598e+09		0.0020487	4.19e-07	11.0484			0.208957	0.43431
	UWC3_Di9.1	1.82892e+09		0.00204949	2.92e-07	11.4378			0.145621	0.407637
	UWC3_Di10.1	1.84219e+09		0.00204886	3.84e-07	11.1259			0.191502	0.426187
	UWC3_Di12.1	1.75579e+09		0.00205022	2.26e-07	11.7981			0.112707	0.397071
1	97M44OPX (average, n=25 out of 26)	1.8305e+09		0.00203921	1.53269e-06	6.3677	-1.6223	7.99		0.764358
	97M44_Z7067L_Opx4.2	1.84329e+09		0.00203803	3.23e-07	5.78073			0.161081	0.413412
	97M44_Z7067L_Opx5.1	1.83504e+09		0.00203978	3.15e-07	6.64831			0.157092	0.411874
	97M44_Z7067L_Opx6.1	1.81236e+09		0.00203853	3.58e-07	6.03093			0.178536	0.42052
	97M44_Z7067L_Opx7.1	1.79796e+09		0.00203867	3.68e-07	6.09756			0.183523	0.422662
	97M44_Z7067L_Opx8.1	1.85279e+09		0.00203868	5.37e-07	6.102			0.267804	0.46549
	97M44_Z7067L_Opx6.2	1.79734e+09		0.00203881	3.15e-07	6.1706			0.157092	0.411874
	97M44_Z7067L_Opx5.2	1.84007e+09		0.00203827	2.18e-07	5.9041			0.108717	0.395957
	97M44_Z7067L_Opx7.2	1.82817e+09		0.00203895	2.11e-07	6.23722			0.105226	0.395012
	97M44_Z7067L_Opx9.1	1.86407e+09		0.0020398	2.56e-07	6.65571			0.127668	0.401574
	97M44_Z7067L_Opx1.2	1.82203e+09		0.00203925	3.11e-07	6.38626			0.155097	0.411117
	97M44_Z7067L_Opx3.2	1.86865e+09		0.00203796	1.25e-07	5.74865			0.0623379	0.385809
	97M44_Z7067L_Opx4.3	1.79157e+09		0.0020385	6.29e-07	6.01613			0.313684	0.493315
	97M44_Opx1.1	1.83525e+09		0.00203976	1.28e-07	6.63844			0.063834	0.386053
	97M44_Opx2.1	1.80959e+09		0.00204049	1.74e-07	6.99969			0.0867744	0.390502
	97M44_Opx3.1	1.84362e+09		0.00203893	2.56e-07	6.22883			0.127668	0.401574
	97M44_Opx4.1	1.78375e+09		0.00203979	2.22e-07	6.65226			0.110712	0.396509
	97M44_Opx5.1	1.83108e+09		0.00204036	3.9e-07	6.93109			0.194494	0.42754
	97M44_Opx6.1	1.83665e+09		0.00203852	3.45e-07	6.026			0.172053	0.417809
	97M44_Opx7.1	1.83404e+09		0.00203891	1.56e-07	6.21847			0.0777977	0.388606
	97M44_Opx9.1	1.83868e+09		0.00204041	2.81e-07	6.95675			0.140136	0.40571
	97M44_Opx10.1	1.75992e+09		0.00204119	1.41e-07	7.34514			0.0703172	0.387178	low CPS/outlier; rejected
	97M44_Opx11.1	1.83516e+09		0.0020395	2.72e-07	6.50766			0.135647	0.404181
	97M44_Opx12.1	1.83715e+09		0.00203983	6.17e-07	6.67052			0.3077	0.489532
	97M44_Opx13.1	1.85229e+09		0.0020386	4.13e-07	6.064			0.205964	0.432878
	97M44_Opx14.1	1.83151e+09		0.00203993	2.99e-07	6.71938			0.149112	0.408897
	97M44_Opx15.1	1.84047e+09		0.00204009	2.12e-07	6.8013			0.105725	0.395146
1	NRM-EN2 Opx (average, n=7 or 7 out of 9)	1.79223e+09		0.00203445	9.33872e-07	4.01524	-1.58476	5.6		0.465725
	NRM-EN2_Opx1.1	1.69642e+09		0.00203581	3.21e-07	4.68711			0.160084	0.413024	low CPS; rejected
	NRM-EN2_Opx1.2	1.79713e+09		0.0020345	5.47e-07	4.04161			0.272791	0.468377
	NRM-EN2_Opx1.3	1.75822e+09		0.00203464	5.07e-07	4.1107			0.252843	0.457047
	NRM-EN2_Opx2.1	1.80259e+09		0.00203461	5.03e-07	4.09737			0.250848	0.455946
	NRM-EN2_Opx2.2	1.80289e+09		0.00203381	3.7e-07	3.70108			0.18452	0.423096
	NRM-EN2_Opx2.3	1.76757e+09		0.00203526	4.27e-07	4.41568			0.212946	0.436244
	NRM-EN2_Opx2.4	1.81828e+09		0.00203411	4.52e-07	3.84914			0.225414	0.442463
	NRM-EN2_Opx2.5	1.79895e+09		0.0020342	3.55e-07	3.89109			0.17704	0.419887
	NRM-EN2_Opx2.6	1.68004e+09		0.00203609	3.8e-07	4.82628			0.189507	0.425294	low CPS; rejected
	Session-211120
	BF064
1	97SL65CPX Di (average, n=33 out of 34)	2.02212e+09		0.00203938	1.03084e-06	4.87	-7.01661e-14	4.87		0.514085
	97SL65_Z7104R_Di1-1.1	2.0593e+09		0.00203995	3.08e-07	5.14763			0.153601	0.536541
	97SL65_Di1.1	2.08944e+09		0.00203826	3.75e-07	4.31738			0.187014	0.547044
	97SL65_Di15.1	2.10473e+09		0.00203964	2.58e-07	4.99784			0.128665	0.529941
	97SL65_Di2.1	2.06046e+09		0.0020397	3.99e-07	5.02691			0.198983	0.55125
	97SL65_Z7106L_Di1-1.1	2.02021e+09		0.00203859	5.09e-07	4.47752			0.25384	0.573339
	97SL65_Z7106L_Di1-7.1	1.99296e+09		0.00203937	3.32e-07	4.86382			0.16557	0.540089
	97SL65_Z7106L_Di1-2.1	2.01539e+09		0.00203932	8.79e-07	4.83721			0.43836	0.675605
	97SL65_Z7106L_Di1-6.1	2.00674e+09		0.00203992	3.4e-07	5.13679			0.169559	0.541325
	97SL65_Z7106L_Di1-3.1	1.98076e+09		0.00203975	3.44e-07	5.05056			0.171554	0.541954
	97SL65_Z7106L_Di1-5.1	1.98705e+09		0.0020403	1.88e-07	5.3196			0.0937562	0.522564
	97SL65_Z7106L_Di1-4.1	1.97791e+09		0.00203941	1.95e-07	4.88106			0.0972472	0.523202
	97SL65_Z7106L_Di1-1.2	2.00384e+09		0.00203988	6.27e-07	5.1161			0.312687	0.601711
	97SL65_Z7105L_Di1-1.1	2.05656e+09		0.00203897	6.36e-07	4.66525			0.317175	0.604056
	97SL65_Z7105L_Di1-6.1	2.02753e+09		0.00203889	4.76e-07	4.62879			0.237383	0.566245
	97SL65_Z7105L_Di1-2.1	1.98554e+09		0.00204179	3.08e-07	6.05869			0.153601	0.536541	rejected
	97SL65_Z7105L_Di1-5.1	2.02836e+09		0.00203886	7.88e-07	4.61055			0.392978	0.647082
	97SL65_Di1.1	1.95407e+09		0.00203922	4.95e-07	4.79139			0.246858	0.570282
	97SL65_Di15.1	2.09412e+09		0.00203845	3.88e-07	4.40853			0.193497	0.549294
	97SL65_Di2.1	1.98016e+09		0.00203938	7.98e-07	4.86677			0.397965	0.650122
	97SL65_Di14.1	2.04757e+09		0.0020398	2.08e-07	5.07471			0.10373	0.524445
	97SL65_Di1.1	2.03106e+09		0.00203918	6.95e-07	4.7702			0.346599	0.620011
	97SL65_Di9.1	2.01757e+09		0.00203858	6.42e-07	4.47456			0.320168	0.605632
	97SL65_Di18.1	2.01595e+09		0.00204017	3.67e-07	5.25751			0.183024	0.545693
	97SL65_Di2.1	2.01791e+09		0.00203917	3.56e-07	4.76576			0.177538	0.543878
	97SL65_Di17.1	2.0308e+09		0.00203959	4.73e-07	4.97025			0.235887	0.565619
	97SL65_Di3.1	2.00269e+09		0.00203969	1.58e-07	5.02199			0.0787951	0.520088
	97SL65_Di16.1	2.01381e+09		0.00203957	7.92e-07	4.96286			0.394973	0.648295
	97SL65_Di4.1	2.02458e+09		0.00203936	4.32e-07	4.8584			0.21544	0.557402
	97SL65_Di15.1	1.99117e+09		0.00203954	2.58e-07	4.94808			0.128665	0.529941
	97SL65_Di5.1	2.02546e+09		0.00203947	2.22e-07	4.91408			0.110712	0.525871
	97SL65_Di14.1	2.02079e+09		0.00203854	3.47e-07	4.45337			0.17305	0.542429
	97SL65_Di6.1	2.01705e+09		0.00203951	3.64e-07	4.9328			0.181528	0.545193
	97SL65_Di13.1	2.01056e+09		0.00204012	5.79e-07	5.23337			0.288749	0.589626
	97SL65_Di7.1	2.02333e+09		0.0020395	2.67e-07	4.92837			0.133154	0.531049
1	95AK24 (or UWC3) Di (average, n=6)	2.01534e+09		0.00205136	1.34915e-06	10.7701	0.59012	10.18		0.672824
	UWC3_Di1.1	2.01149e+09		0.00205165	2.68e-07	10.9136			0.133653	0.531174
	UWC3_Di1.2	2.01498e+09		0.00205117	5.18e-07	10.6786			0.258328	0.57534
	UWC3_Di2.1	2.01549e+09		0.00205038	3.68e-07	10.2873			0.183523	0.54586
	UWC3_Di3.1	2.02665e+09		0.00205111	2.22e-07	10.6475			0.110712	0.525871
	UWC3_Di3.2	2.00456e+09		0.00205242	3.69e-07	11.294			0.184022	0.546028
	UWC3_Di3.3	2.01885e+09		0.00205142	2.72e-07	10.7998			0.135647	0.531679
1	NIJ-JD Jd (average, n=6)	1.98764e+09		0.00203622	1.06657e-06	3.31179	-6.76821	10.08		0.531903
	NIJ_Jd1.1	1.9868e+09		0.00203555	4.09e-07	2.98207			0.20397	0.55307
	NIJ_Jd1.2	1.99874e+09		0.00203564	2.13e-07	3.02543			0.106224	0.524944
	NIJ_Jd2.1	1.98693e+09		0.00203666	3.3e-07	3.52605			0.164572	0.539784
	NIJ_Jd2.2	1.97407e+09		0.00203627	4.06e-07	3.33438			0.202474	0.55252
	NIJ_Jd3.1	2.0075e+09		0.00203633	3.07e-07	3.3669			0.153102	0.536398
	NIJ_Jd3.2	1.97181e+09		0.00203688	2.83e-07	3.63593			0.141133	0.533105
1	NRM-AG1 Cpx (average, n=5)	2.0406e+09		0.00204374	1.50083e-06	7.01785	1.51785	5.5		0.748469
	NRM-AG1_Cpx1.1	2.01683e+09		0.00204423	3.14e-07	7.26047			0.156593	0.537405
	NRM-AG1_Cpx2.1	2.04728e+09		0.0020429	4.86e-07	6.60119			0.24237	0.568354
	NRM-AG1_Cpx3.1	2.06749e+09		0.00204416	5.81e-07	7.22253			0.289747	0.590115
	NRM-AG1_Cpx4.1	2.03463e+09		0.00204296	3.51e-07	6.63371			0.175045	0.543069
	NRM-AG1_Cpx5.1	2.03678e+09		0.00204446	3.6e-07	7.37133			0.179533	0.544532
1	NSH6CPX (average, n=6)	2.00702e+09		0.0020413	7.2672e-07	5.81233	0.642328	5.17		0.362418	6.09?
	NSH6_Cpx1.1	2.03465e+09		0.00204086	2.7e-07	5.59996			0.13465	0.531426
	NSH6_Cpx1.2	2.00474e+09		0.00204159	4.71e-07	5.95818			0.234889	0.565204
	NSH6_Cpx1.3	1.99765e+09		0.00204126	2.57e-07	5.79607			0.128167	0.52982
	NSH6_Cpx2.1	1.99895e+09		0.00204091	1.59e-07	5.62213			0.0792938	0.520164
	NSH6_Cpx2.2	1.99891e+09		0.00204178	3.78e-07	6.04933			0.18851	0.547557
	NSH6_Cpx2.3	2.00723e+09		0.00204137	4.28e-07	5.8483			0.213445	0.556634
1	QLP08-1OMP (average, n=22)	1.9972e+09		0.00201204	1.51242e-06	-8.60375	-0.993747	-7.61		0.754247
	QLP08-1_Omp1.1	1.99684e+09		0.00201184	1.04e-06	-8.70061			0.518652	0.730262
	QLP08-1_Omp2.1	1.98782e+09		0.0020134	2.08e-07	-7.93294			0.10373	0.524445
	QLP08-1_Omp3.1	2.00046e+09		0.00201241	3.94e-07	-8.42271			0.196489	0.550355
	QLP08-1_Omp16.1	1.99929e+09		0.00201117	1e-06	-9.03222			0.498703	0.716232
	QLP08-1_Omp17.1	2.00399e+09		0.00201179	3.78e-07	-8.72328			0.18851	0.547557
	QLP08-1_Omp18.1	1.99213e+09		0.00201288	3.4e-07	-8.18965			0.169559	0.541325
	QLP08-1_Omp1.1	1.97069e+09		0.00201263	4.68e-07	-8.31234			0.233393	0.564584
	QLP08-1_Omp1.1	2.08639e+09		0.00201251	3.6e-07	-8.37098			0.179533	0.544532
	QLP08-1_Omp2.1	1.97134e+09		0.00201206	3.61e-07	-8.59123			0.180032	0.544697
	QLP08-1_Omp13.1	1.94768e+09		0.00201101	2.11e-07	-9.1081			0.105226	0.524743
	QLP08-1_Omp13.1	2.09606e+09		0.00201061	2.31e-07	-9.30815			0.1152	0.526834
	QLP08-1_Z7104R_Omp1-1.1	1.91126e+09		0.00201289	5.1e-07	-8.18522			0.254339	0.57356
	QLP08-1_Z7104R_Omp2-1.1	2.03166e+09		0.00201148	1.95e-07	-8.87849			0.0972472	0.523202
	QLP08-1_Z7105L_Omp1-1.1	2.03497e+09		0.00201149	1.41e-07	-8.87258			0.0703172	0.518871
	QLP08-1_Z7105L_Omp1-2.1	1.99247e+09		0.00201172	2.78e-07	-8.76171			0.13864	0.532451
	QLP08-1_Z7105L_Omp1-3.1	2.02885e+09		0.0020116	4.35e-07	-8.81936			0.216936	0.557982
	QLP08-1_Z7106L_Omp1-1.1	2.01128e+09		0.00201138	3.11e-07	-8.92579			0.155097	0.536971
	QLP08-1_Z7106L_Omp1-1.2	1.99929e+09		0.00201333	7.84e-07	-7.96595			0.390983	0.645872
	QLP08-1_Z7106L_Omp1-2.1	1.98806e+09		0.00201132	1.01e-07	-8.95634			0.050369	0.516546
	QLP08-1_Z7106L_Omp1-3.1	1.95836e+09		0.00201264	5.32e-07	-8.30889			0.26531	0.578509
	QLP08-1_Z7106L_Omp1-4.1	1.97927e+09		0.00201244	5.87e-07	-8.40497			0.292739	0.59159
	QLP08-1_Z7106L_Omp1-4.2	1.95024e+09		0.00201223	2.83e-07	-8.51091			0.141133	0.533105
1	97M44OPX (average, n=5 out of 6)	2.03664e+09		0.00204243	1.63055e-06	6.37197	-1.61803	7.99		0.813161
	97M44_Opx1.1	1.9909e+09		0.00204388	6.47e-07	7.08801			0.322661	0.606954
	97M44_Opx2.1	2.01493e+09		0.00204306	7.69e-07	6.68299			0.383503	0.641371
	97M44_Opx7.1	2.03163e+09		0.00204178	5.59e-07	6.04884			0.278775	0.584806
	97M44_Opx16.1	2.0639e+09		0.00204137	4.86e-07	5.84978			0.24237	0.568354
	97M44_Opx20.1	2.03376e+09		0.00204322	5.3e-07	6.75936			0.264313	0.578052
	97M44_Opx22.1	2.03898e+09		0.00204273	4.13e-07	6.51891			0.205964	0.553809
1	NRM-EN2 Opx (average, n=10)	1.99408e+09		0.00203716	1.00116e-06	3.77291	-1.82709	5.6		0.499284
	NRM-EN2_Opx1.1	1.96864e+09		0.0020374	3.92e-07	3.89511			0.195492	0.55
	NRM-EN2_Opx1.1	2.01998e+09		0.0020369	4.72e-07	3.64628			0.235388	0.565412
	NRM-EN2_Opx1.2	1.98219e+09		0.00203741	9.62e-07	3.89856			0.479753	0.703168
	NRM-EN2_Opx1.2	2.01834e+09		0.00203663	4.47e-07	3.51373			0.22292	0.560336
	NRM-EN2_Opx2.1	1.98986e+09		0.00203744	3.29e-07	3.91235			0.164073	0.539632
	NRM-EN2_Opx2.1	2.0088e+09		0.00203655	6.89e-07	3.47481			0.343607	0.618343
	NRM-EN2_Opx2.2	1.97008e+09		0.00203787	2.24e-07	4.12521			0.11171	0.526082
	NRM-EN2_Opx2.2	2.01049e+09		0.00203684	5.97e-07	3.61573			0.297726	0.594074
	NRM-EN2_Opx2.3	1.97401e+09		0.00203785	2.08e-07	4.11634			0.10373	0.524445
	NRM-EN2_Opx3.1	1.99838e+09		0.00203667	1.76e-07	3.53098			0.0877718	0.521524
1	06JY34OPX-A (average, n=6)	1.95528e+09		0.00203733	5.1629e-07	3.85905	-1.78095	5.64		0.257476
	06JY34A_Opx1.1	1.9773e+09		0.00203704	4.41e-07	3.71624			0.219928	0.559152
	06JY34A_Opx2.1	1.96904e+09		0.00203707	2.79e-07	3.73103			0.139138	0.532581
	06JY34A_Opx3.1	1.94817e+09		0.00203758	2.59e-07	3.9838			0.129164	0.530063
	06JY34A_Opx4.1	1.93956e+09		0.00203722	3.14e-07	3.80247			0.156593	0.537405
	06JY34A_Opx5.1	1.94122e+09		0.00203764	1.28e-07	4.00942			0.063834	0.518032
	06JY34A_Opx6.1	1.9564e+09		0.00203744	2.99e-07	3.91137			0.149112	0.535273
	Session-211129A
	BF064
1	97SL65CPX DI (average, n=37)	2.01895e+09		0.0020289	1.50775e-06	4.87	-7.01661e-14	4.87		0.751922
	97SL65_BF117L_DiW1.1	2.02472e+09		0.00202919	5.6e-07	5.01488			0.279274	0.80211
	97SL65_BF117L_DiE1.1	2.02162e+09		0.00202929	7.2e-07	5.06341			0.359066	0.833256
	97SL65_BF117L_DiW5.1	2.00396e+09		0.00202863	4.3e-07	4.73851			0.214442	0.781903
	97SL65_BF117L_DiE6.1	2.0467e+09		0.00202846	1.84e-07	4.64986			0.0917614	0.7575
	97SL65_BF117L_DiW2.1	2.02769e+09		0.00202899	2.13e-07	4.91433			0.106224	0.759388
	97SL65_BF117L_DiE2.1	2.0446e+09		0.0020284	3.68e-07	4.6241			0.183523	0.773994
	97SL65_BF117L_DiW4.1	2.03473e+09		0.00203004	9.13e-07	5.43487			0.455316	0.879033
	97SL65_BF117L_DiE5.1	2.05366e+09		0.00202892	8.55e-07	4.87966			0.426391	0.864405
	97SL65_BF118C_DiSE1.1	2.00882e+09		0.00202991	5.62e-07	5.36949			0.280271	0.802458
	97SL65_BF118C_DiSW1.1	2.03987e+09		0.00203037	5.67e-07	5.59881			0.282765	0.803332
	97SL65_BF118C_DiSE6.1	2.04742e+09		0.0020289	7.29e-07	4.87224			0.363555	0.8352
	97SL65_BF118C_DiSW5.1	2.04661e+09		0.00202944	5.64e-07	5.1377			0.281269	0.802807
	97SL65_BF118C_DiSE2.1	2.007e+09		0.0020296	4.25e-07	5.21546			0.211949	0.781223
	97SL65_BF118C_DiSW2.1	2.04299e+09		0.00202831	5.24e-07	4.57754			0.261321	0.796037
	97SL65_BF115L_DiNES1.1	2.01471e+09		0.00202976	3.93e-07	5.2952			0.19599	0.777045
	97SL65_BF115L_DiNES4.1	2.00322e+09		0.00202843	2.56e-07	4.63599			0.127668	0.762683
	97SL65_BF116C_DiNE1.1	1.99336e+09		0.00202983	8.18e-07	5.33086			0.407939	0.855454
	97SL65_BF116C_DiNE4.1	2.01235e+09		0.00202925	4.56e-07	5.04212			0.227409	0.785558
	97SL65_BF116C_DiNE2.1	2.00151e+09		0.00202838	3.64e-07	4.61073			0.181528	0.773524
	97SL65_BF114C_DiNW1.1	1.98506e+09		0.00202951	3.69e-07	5.17436			0.184022	0.774113
	97SL65_BF114C_DiNW5.1	2.01299e+09		0.00202846	7.5e-07	4.65085			0.374028	0.839811
	97SL65_BF114C_DiNW2.1	2.01111e+09		0.00202882	1.31e-07	4.83113			0.0653301	0.754755
	97SL65_BF114C_DiNW4.1	2.01106e+09		0.00202923	4.41e-07	5.03469			0.219928	0.783425
	97SL65_BF114C_DiNW3.1	2.02857e+09		0.00202929	4.17e-07	5.0649			0.207959	0.78015
	97SL65_BF107L_DiW1.1	2.01741e+09		0.00202936	2.86e-07	5.09759			0.142629	0.76533
	97SL65_BF107L_DiW7.1	2.04202e+09		0.00203001	5.12e-07	5.41853			0.255336	0.794093
	97SL65_BF107L_DiW2.1	1.97557e+09		0.00202864	3.74e-07	4.74099			0.186515	0.774709
	97SL65_BF107L_DiW6.1	2.06185e+09		0.00202842	2.29e-07	4.6345			0.114203	0.760545
	97SL65_BF107L_DiW3.1	2.04343e+09		0.00202994	2.39e-07	5.38633			0.11919	0.76131
	97SL65_BF107L_DiSE1.1	2.04309e+09		0.00202841	2.16e-07	4.62707			0.10772	0.759599
	97SL65_BF108L_Di1.1	2.00881e+09		0.0020277	1.83e-07	4.2784			0.0912627	0.75744
	97SL65_BF108L_Di9.1	2.0135e+09		0.00202776	3.36e-07	4.30316			0.167564	0.770366
	97SL65_BF108L_Di2.1	2.02749e+09		0.00202817	1.48e-07	4.50722			0.0738081	0.755536
	97SL65_BF108L_Di8.1	1.98297e+09		0.00202838	3.45e-07	4.61221			0.172053	0.771355
	97SL65_BF108L_Di3.1	1.99358e+09		0.00202776	4.12e-07	4.30762			0.205466	0.779489
	97SL65_BF108L_Di7.1	1.99149e+09		0.00202748	1.81e-07	4.16498			0.0902653	0.757321
	97SL65_BF108L_Di4.1	1.97559e+09		0.00202785	4.62e-07	4.34972			0.230401	0.786429
1	95AK24 (or UWC3) Di (average, n=4 out of 5)	1.98508e+09		0.00204004	1.86681e-06	10.387	0.207036	10.18		0.930983
	UWC3_Di1.1	1.99023e+09		0.00203999	2.69e-07	10.3619			0.134151	0.763795
	UWC3_Di1.2	2.00576e+09		0.00204103	5.79e-07	10.8765			0.288749	0.805458
	UWC3_Di2.1	1.97441e+09		0.00204034	6.23e-07	10.5377			0.310692	0.813582
	UWC3_Di3.1	1.97981e+09		0.00204109	1.992e-06	10.9052			0.993417	1.2459	large error; rejected
	UWC3_Di3.2	1.96993e+09		0.0020388	6.93e-07	9.77202			0.345601	0.827543
1	NIJ-JD Jd (average, n=6)	1.9367e+09		0.00202596	1.59297e-06	3.41587	-6.66413	10.08		0.794421
	NIJ_Jd1.1	1.93783e+09		0.0020255	8.21e-07	3.18482			0.409435	0.856168
	NIJ_Jd1.2	1.93534e+09		0.00202556	5.11e-07	3.21454			0.254837	0.793932
	NIJ_Jd2.1	1.91564e+09		0.00202738	6.73e-07	4.11545			0.335627	0.823427
	NIJ_Jd2.2	1.93201e+09		0.00202585	4.28e-07	3.35966			0.213445	0.78163
	NIJ_Jd3.1	1.95012e+09		0.00202516	5.22e-07	3.0194			0.260323	0.79571
	NIJ_Jd3.2	1.94927e+09		0.00202634	4.13e-07	3.60135			0.205964	0.77962
1	NRM-AG1_Cpx (average, n=7 out of 8)	2.03398e+09		0.00203342	1.18905e-06	7.10927	1.60927	5.5		0.592983
	NRM-AG1_Cpx1.1	1.99288e+09		0.00203411	3.08e-07	7.44917			0.153601	0.76745
	NRM-AG1_Cpx1.1	2.04845e+09		0.00203358	3.25e-07	7.18766			0.162079	0.769192
	NRM-AG1_Cpx2.1	1.9923e+09		0.00202967	5.65e-07	5.2541			0.281767	0.802982	outlier; rejected
	NRM-AG1_Cpx2.1	2.02448e+09		0.00203351	6.66e-07	7.152			0.332136	0.822011
	NRM-AG1_Cpx3.1	1.99194e+09		0.00203323	8.4e-07	7.01729			0.418911	0.86074
	NRM-AG1_Cpx3.1	2.05668e+09		0.00203298	1.45e-07	6.88901			0.072312	0.755391
	NRM-AG1_Cpx4.1	2.07841e+09		0.00203245	5.68e-07	6.62948			0.283264	0.803508
	NRM-AG1_Cpx5.1	2.04504e+09		0.00203409	6.62e-07	7.44025			0.330142	0.821207
1	NSH6CPX (average, n=6)	2.00234e+09		0.00203066	1.52645e-06	5.74434	0.574338	5.17		0.761248	6.09?
	NSH6_Cpx1.1	2.00541e+09		0.00203061	2.59e-07	5.71569			0.129164	0.762935
	NSH6_Cpx1.2	1.98766e+09		0.00202926	3.78e-07	5.04905			0.18851	0.775192
	NSH6_Cpx1.3	2.00007e+09		0.00203134	5.2e-07	6.07675			0.259326	0.795385
	NSH6_Cpx2.1	1.9995e+09		0.00203072	4.92e-07	5.77315			0.245362	0.790942
	NSH6_Cpx2.2	1.99977e+09		0.00203136	9.17e-07	6.08864			0.457311	0.880068
	NSH6_Cpx2.3	2.02164e+09		0.0020307	3.21e-07	5.76275			0.160084	0.768774
1	QLP08-1OMP (average, n=30 out of 33)	1.9959e+09		0.00200165	1.80174e-06	-8.62806	-1.01806	-7.61		0.898533
	QLP08-1_BF117L_OmpW1.1	2.02287e+09		0.00200219	2.52e-07	-8.35962			0.125673	0.762352
	QLP08-1_BF117L_OmpE1.1	2.01554e+09		0.00200255	6.07e-07	-8.18281			0.302713	0.810569
	QLP08-1_BF117L_OmpW7.1	2.00963e+09		0.00200148	1.93e-07	-8.7083			0.0962498	0.758057
	QLP08-1_BF117L_OmpE8.1	1.99918e+09		0.00200138	5.2e-07	-8.7603			0.259326	0.795385
	QLP08-1_BF117L_OmpW2.1	2.02378e+09		0.00200355	2.03e-07	-7.68406			0.101237	0.758707
	QLP08-1_BF117L_OmpE2.1	2.03999e+09		0.00200124	4.75e-07	-8.82766			0.236884	0.788353
	QLP08-1_BF118C_OmpSW1.1	1.96359e+09		0.00200314	3.5e-07	-7.88663			0.174546	0.771915
	QLP08-1_BF118C_OmpSE1.1	2.05639e+09		0.00200109	3.63e-07	-8.90542			0.181029	0.773407
	QLP08-1_BF118C_OmpSW6.1	2.01637e+09		0.00200326	4.5e-07	-7.82967			0.224417	0.784697
	QLP08-1_BF118C_OmpSE6.1	2.11159e+09		0.00199974	2.85e-07	-9.57256			0.14213	0.765237	outlier; rejected
	QLP08-1_BF115L_OmpNES4.1	1.99757e+09		0.00200005	7.35e-07	-9.41902			0.366547	0.836507
	QLP08-1_BF115L_OmpNEN5.1	2.03033e+09		0.00200151	3.23e-07	-8.69492			0.161081	0.768982
	QLP08-1_BF114C_OmpNW1.1	1.95693e+09		0.00200268	9.04e-07	-8.11495			0.450828	0.876717
	QLP08-1_BF114C_OmpNE1.1	1.99372e+09		0.00200415	5.85e-07	-7.3859			0.291741	0.806536
	QLP08-1_BF114C_OmpNW5.1	1.98195e+09		0.00200249	5.17e-07	-8.21104			0.25783	0.794898
	QLP08-1_BF114C_OmpNE5.1	2.00672e+09		0.00200211	5.43e-07	-8.39726			0.270796	0.799198
	QLP08-1_BF107L_OmpW1.1	2.01756e+09		0.00200196	3.21e-07	-8.47502			0.160084	0.768774
	QLP08-1_BF107L_OmpW4.1	2.08285e+09		0.00200038	6.82e-07	-9.25707			0.340116	0.825267
	QLP08-1_BF107L_OmpW3.1	2.02362e+09		0.00200288	2.83e-07	-8.01639			0.141133	0.765052
	QLP08-1_BF107L_OmpW2.1	2.01799e+09		0.00200244	4.63e-07	-8.23432			0.2309	0.786576
	QLP08-1_BF107L_OmpSE1.1	2.07441e+09		0.00199997	3.22e-07	-9.45765			0.160582	0.768878
	QLP08-1_BF108L_Omp1.1	1.96524e+09		0.00200142	3.38e-07	-8.74049			0.168562	0.770584
	QLP08-1_BF108L_Omp7.1	1.98121e+09		0.0020009	3.53e-07	-8.99853			0.176042	0.772255
	QLP08-1_BF108L_Omp2.1	1.98688e+09		0.00200133	3.71e-07	-8.78655			0.185019	0.774351
	QLP08-1_BF108L_Omp6.1	1.9429e+09		0.00200104	4.02e-07	-8.92771			0.200479	0.778189
	QLP08-1_BF108L_Omp3.1	1.94334e+09		0.00200214	4.05e-07	-8.38389			0.201975	0.778576
	QLP08-1_BF108L_Omp5.1	1.94272e+09		0.00200108	3.68e-07	-8.90938			0.183523	0.773994
	QLP08-1_BF108L_Omp4.1	1.95869e+09		0.00200022	2.92e-07	-9.33284			0.145621	0.765893
	QLP08-1_Omp9.1	1.98074e+09		0.00200183	3.6e-07	-8.53594			0.179533	0.773058
	QLP08-1_Omp10.1	1.96521e+09		0.00200227	3.34e-07	-8.31851			0.166567	0.77015
	QLP08-1_Omp11.1	1.95506e+09		0.00200226	5.18e-07	-8.32396			0.258328	0.79506
	QLP08-1_Omp12.1	1.97102e+09		0.0020005	3.83e-07	-9.19417			0.191003	0.775802
	QLP08-1_Omp13.1	1.97061e+09		0.0020016	4.67e-07	-8.65184			0.232894	0.787164
1	97M44OPX (average, n=41)	2.00822e+09		0.00203222	1.59891e-06	6.5124	-1.4776	7.99		0.797381
	97M44_BF117L_OpxW1.1	2.04252e+09		0.0020319	3.18e-07	6.35361			0.158588	0.768464
	97M44_BF117L_OpxE1.1	1.99965e+09		0.00203214	2.05e-07	6.47545			0.102234	0.75884
	97M44_BF117L_OpxW8.1	2.01576e+09		0.00203406	1.052e-06	7.42688			0.524636	0.916859
	97M44_BF117L_OpxE7.1	2.02904e+09		0.00203313	4.4e-07	6.9638			0.219429	0.783285
	97M44_BF117L_OpxW2.1	2.04048e+09		0.00203306	6.37e-07	6.92962			0.317674	0.816274
	97M44_BF117L_OpxE2.1	2.03105e+09		0.00203345	8.36e-07	7.12575			0.416916	0.859771
	97M44_BF117L_OpxW7.1	2.02708e+09		0.00203244	6.12e-07	6.62304			0.305206	0.811503
	97M44_BF117L_OpxE6.1	2.03372e+09		0.00203189	3.84e-07	6.34916			0.191502	0.775925
	97M44_BF118C_OpxSE2.1	2.02536e+09		0.00203199	4.78e-07	6.39967			0.23838	0.788804
	97M44_BF118C_OpxSW1.1	2.00955e+09		0.00203342	4.4e-07	7.10842			0.219429	0.783285
	97M44_BF118C_OpxSE11.1	2.04239e+09		0.00203185	3.94e-07	6.33331			0.196489	0.777171
	97M44_BF118C_OpxSW5.1	2.02963e+09		0.0020321	4.81e-07	6.45515			0.239876	0.789257
	97M44_BF118C_OpxSE4.1	2.02505e+09		0.00203293	4.25e-07	6.86375			0.211949	0.781223
	97M44_BF118C_OpxSW2.1	2.00565e+09		0.00203291	2.22e-07	6.85483			0.110712	0.760029
	97M44_BF115L_OpxNES1.1	1.98241e+09		0.00203125	3e-07	6.03564			0.149611	0.766662
	97M44_BF115L_OpxNES11.1	1.97924e+09		0.00203139	3.37e-07	6.10498			0.168063	0.770475
	97M44_BF115L_OpxNES3.1	1.99377e+09		0.00203088	1.22e-07	5.84892			0.0608418	0.754379
	97M44_BF115L_OpxNES10.1	1.98213e+09		0.00203269	2.81e-07	6.74736			0.140136	0.764869
	97M44_BF115L_OpxNES4.1	1.93389e+09		0.00203226	6.75e-07	6.53637			0.336625	0.823834
	97M44_BF115L_OpxNES9.1	1.98632e+09		0.00203176	2.62e-07	6.28873			0.13066	0.76319
	97M44_BF116C_OpxSE5.1	2.0421e+09		0.00203177	4.78e-07	6.28972			0.23838	0.788804
	97M44_BF116C_OpxNE1.1	1.9426e+09		0.00203341	3.8e-07	7.10545			0.189507	0.775435
	97M44_BF116C_OpxNE11.1	1.99359e+09		0.00203142	8.44e-07	6.11687			0.420906	0.861712
	97M44_BF116C_OpxNE2.1	1.961e+09		0.00203209	8.74e-07	6.4497			0.435867	0.869118
	97M44_BF116C_OpxNE10.1	2.0023e+09		0.00203204	4.35e-07	6.42295			0.216936	0.782591
	97M44_BF116C_OpxNE3.1	1.99152e+09		0.00203154	3.84e-07	6.17531			0.191502	0.775925
	97M44_BF116C_OpxNE9.1	2.01688e+09		0.00203219	1.99e-07	6.5017			0.099242	0.758443
	97M44_BF116C_OpxSE12.1	2.03265e+09		0.0020304	3.99e-07	5.61515			0.198983	0.777805
	97M44_BF114C_OpxNW1.1	2.01416e+09		0.00203238	3.16e-07	6.59234			0.15759	0.768259
	97M44_BF114C_OpxNE2.1	2.01364e+09		0.00203218	3.05e-07	6.49378			0.152105	0.767152
	97M44_BF114C_OpxNW10.1	1.99182e+09		0.0020325	3.19e-07	6.65227			0.159086	0.768567
	97M44_BF114C_OpxNE4.1	2.01926e+09		0.00203226	2.69e-07	6.5334			0.134151	0.763795
	97M44_BF107L_OpxSE2.1	2.02437e+09		0.00203295	4.48e-07	6.87514			0.223419	0.784412
	97M44_BF107L_OpxW1.1	2.02481e+09		0.00203269	4.87e-07	6.74736			0.242869	0.790172
	97M44_BF107L_OpxSE11.1	2.05081e+09		0.00203159	4.74e-07	6.20404			0.236385	0.788204
	97M44_BF107L_OpxW11.1	2.08748e+09		0.00203325	2.44e-07	7.0267			0.121684	0.761704
	97M44_BF107L_OpxSE2.2	2.00264e+09		0.00203298	3.8e-07	6.89			0.189507	0.775435
	97M44_BF108L_Opx1.1	1.98856e+09		0.00203225	3.49e-07	6.52845			0.174047	0.771803
	97M44_BF108L_Opx11.1	1.99859e+09		0.00203109	2.51e-07	5.95442			0.125175	0.76227
	97M44_BF108L_Opx2.1	1.94083e+09		0.00203123	5.85e-07	6.02425			0.291741	0.806536
	97M44_BF108L_Opx10.1	1.98289e+09		0.00203115	6.99e-07	5.98513			0.348594	0.828797
1	NRM-EN2_Opx (average, n=5 out of 6)	1.96675e+09		0.00202737	1.34457e-06	4.11089	-1.48911	5.6		0.67054
	NRM-EN2_Opx1.1	1.95586e+09		0.00202684	6.79e-07	3.84998			0.33862	0.824651
	NRM-EN2_Opx1.2	1.97619e+09		0.00202796	2.25e-07	4.40519			0.112208	0.760248
	NRM-EN2_Opx2.1	1.98384e+09		0.00202687	6.82e-07	3.86583			0.340116	0.825267
	NRM-EN2_Opx2.2	1.95502e+09		0.00202693	1.28e-07	3.89555			0.063834	0.754627
	NRM-EN2_Opx3.1	1.93505e+09		0.00202468	5.49e-07	2.77869			0.273788	0.800217	outlier; rejected
	NRM-EN2_Opx3.2	1.96285e+09		0.00202823	7.91e-07	4.53792			0.394474	0.849115
1	06JY34OPX-A (average, n=6)	1.91464e+09		0.00202657	1.64958e-06	3.71427	-1.92573	5.64		0.822651
	06JY34A_Opx1.1	1.93259e+09		0.00202687	3.74e-07	3.86484			0.186515	0.774709
	06JY34A_Opx2.1	1.91887e+09		0.00202637	8.59e-07	3.61819			0.428386	0.865391
	06JY34A_Opx3.1	1.90659e+09		0.00202637	1.104e-06	3.61522			0.550569	0.93194
	06JY34A_Opx4.1	1.90468e+09		0.00202693	6.55e-07	3.89257			0.326651	0.819809
	06JY34A_Opx5.1	1.90828e+09		0.00202519	6.99e-07	3.03426			0.348594	0.828797
	06JY34A_Opx6.1	1.91681e+09		0.00202767	3.3e-07	4.26057			0.164572	0.769721
1	MB04-8OPX (average, n=10)	2.03693e+09		0.00202991	1.37851e-06	5.37088	-1.51912	6.89		0.687468
	BF117_MB04-8_7C_Opx27.1	2.04494e+09		0.0020305	3.77e-07	5.66022			0.188011	0.775071
	BF117_MB04-8_7B_Cpx431.1	2.0273e+09		0.00202925	5.38e-07	5.04509			0.268302	0.798356
	BF117_MB04-8_7B_Opx26.1	2.03615e+09		0.00202943	3.29e-07	5.13028			0.164073	0.769615
	BF117_MB04-8_7B_Px427.1	2.0152e+09		0.00203131	2.3e-07	6.06388			0.114702	0.76062
	BF117_MB04-8_7B_Px428.1	2.04234e+09		0.00203013	3.12e-07	5.48143			0.155595	0.767852
	BF117_MB04-8_7C_Opx434.1	2.02571e+09		0.00203052	1.25e-07	5.67459			0.0623379	0.754502
	BF117_MB04-8_7C_Opx435.1	2.01983e+09		0.00202918	2.39e-07	5.01091			0.11919	0.76131
	BF117_MB04-8_7C_Opx436.1	2.04915e+09		0.00202941	5.47e-07	5.12087			0.272791	0.799876
	BF117_MB04-8_7C_Opx437.1	2.06426e+09		0.00202968	2.03e-07	5.25608			0.101237	0.758707
	BF117_MB04-8_7C_Opx438.1	2.0444e+09		0.0020297	5.51e-07	5.26549			0.274786	0.800558
1	MB04-8CPX (average, n=13)	2.04478e+09		0.00203675	9.89219e-07	8.75853	1.89853	6.86		0.493327
	BF116_MB04-8_7BA_Px12.1	2.00184e+09		0.00203736	4.83e-07	9.06229			0.240874	0.789561
	BF116_MB04-8_7BA_Px414.1	2.02602e+09		0.0020368	2.92e-07	8.78493			0.145621	0.765893
	BF116_MB04-8_7BB_Px16.1	2.03247e+09		0.00203612	2.51e-07	8.44616			0.125175	0.76227
	BF116_MB04-8_7BB_Px418.1	2.0523e+09		0.00203682	2.11e-07	8.79335			0.105226	0.759249
	BF116_MB04-8_7BB_Px-ex419.1	2.06335e+09		0.00203608	2.38e-07	8.42437			0.118691	0.761232
	BF116_MB04-8_7BB_Px-ex419.2	2.02605e+09		0.00203599	5.19e-07	8.38079			0.258827	0.795222
	BF117_MB04-8_7A_Px-ex21.1	2.05865e+09		0.00203692	2.33e-07	8.84189			0.116198	0.760847
	BF117_MB04-8_7A_Px-ex21.2	1.98876e+09		0.00203624	5.63e-07	8.5051			0.28077	0.802632
	BF117_MB04-8_7A_Px-ex22.1	2.07963e+09		0.00203682	2.66e-07	8.79137			0.132655	0.763534
	BF117_MB04-8_7A_Px-ex22.2	1.99355e+09		0.00203685	4.86e-07	8.80821			0.24237	0.790019
	BF117_MB04-8_7B_Cpx426.1	2.08223e+09		0.00203709	7.76e-07	8.92708			0.386994	0.845666
	BF117_MB04-8_7C_Cpx-ex28.1	2.07625e+09		0.00203742	3.51e-07	9.09052			0.175045	0.772028
	BF117_MB04-8_7C_Cpx-ex433.1	2.10107e+09		0.00203725	5.66e-07	9.00484			0.282266	0.803157
	Session-211129B
	BF064
1	97SL65CPX DI (average, n=10 out of 11)	1.99814e+09		0.00202829	2.15868e-06	4.87	-7.01661e-14	4.87		1.07654
	97SL65_BF119R_DiSEN1.1	1.97323e+09		0.00202946	2.55e-07	5.45079			0.127169	1.08403
	97SL65_BF119R_DiSEN2.1	1.94394e+09		0.00202923	2.59e-07	5.33436			0.129164	1.08426
	97SL65_BF119R_DiSEN3.1	1.99347e+09		0.00202951	3.99e-07	5.47407			0.198983	1.09478
	97SL65_BF125L_DiNW1.1	1.99811e+09		0.00202888	2.39e-07	5.16245			0.11919	1.08312
	97SL65_BF125L_DiNW4.1	1.98972e+09		0.00202706	3.38e-07	4.25879			0.168562	1.08966
	97SL65_BF125L_DiNW2.1	1.98361e+09		0.00202938	4.36e-07	5.40818			0.217435	1.09828
	97SL65_BF109C_DiSE1.1	2.01239e+09		0.00202465	3.46e-07	3.0663			0.172551	1.09028
	97SL65_BF109C_DiSE1.1	2.02538e+09		0.00202712	4.23e-07	4.29149			0.210952	1.09702
	97SL65_BF109C_DiSE4.1	2.03086e+09		0.00202761	2.37e-07	4.53524			0.118193	1.08301
	97SL65_BF109C_DiSE2.1	2.01844e+09		0.00202741	4.69e-07	4.43566			0.233892	1.10166
	97SL65_BF109C_DiSE3.1	2.02464e+09		0.00202724	4.68e-07	4.34896			0.233393	1.10155
1	QLP08-1OMP (average, n=8)	1.9806e+09		0.00200083	1.38721e-06	-8.73639	-1.12639	-7.61		0.691808
	QLP08-1_BF119R_OmpSEN1.1	2.02725e+09		0.00200053	3.23e-07	-8.88192			0.161081	1.08853
	QLP08-1_BF125L_OmpNW1.1	1.9685e+09		0.00200188	1.91e-07	-8.2121			0.0952523	1.08075
	QLP08-1_BF125L_OmpNW4.1	1.97719e+09		0.00200049	1.83e-07	-8.90273			0.0912627	1.0804
	QLP08-1_BF109C_OmpSE1.1	1.9627e+09		0.00200085	3.26e-07	-8.72239			0.162577	1.08875
	QLP08-1_BF109C_OmpSE7.1	1.97294e+09		0.00200096	3.67e-07	-8.67087			0.183024	1.09199
	QLP08-1_BF109C_OmpSE2.1	1.94783e+09		0.00200156	5.63e-07	-8.37411			0.28077	1.11255
	QLP08-1_BF109C_OmpSE3.1	1.9698e+09		0.00199961	3.84e-07	-9.34019			0.191502	1.09344
	QLP08-1_BF109C_OmpSE6.1	2.01857e+09		0.00200072	3.63e-07	-8.7868			0.181029	1.09166
1	97M44OPX (average, n=20 out of 21)	1.97538e+09		0.00203201	1.46223e-06	6.71368	-1.27632	7.99		0.729219
	97M44_BF119R_OpxSEN11.1	1.98225e+09		0.0020327	2.5e-07	7.053			0.124676	1.08374
	97M44_BF119R_OpxSEN3.1	1.9815e+09		0.00203154	4.1e-07	6.48029			0.204468	1.09579
	97M44_BF119R_OpxSEN7.1	1.97769e+09		0.00203288	3.85e-07	7.14267			0.192001	1.09353
	97M44_BF119R_OpxSEN4.1	1.97524e+09		0.00203212	3.14e-07	6.76962			0.156593	1.08787
	97M44_BF119R_OpxSEN6.1	1.97973e+09		0.00203255	2.92e-07	6.98017			0.145621	1.08635
	97M44_BF119R_OpxSEN5.1	1.97524e+09		0.00203258	2.71e-07	6.99454			0.135149	1.08499
	97M44_BF125L_Opx1.1	1.99987e+09		0.00203338	1.378e-06	7.39435			0.687213	1.27719	large error, rejected
	97M44_BF125L_Opx2.1	1.99118e+09		0.00203156	2.29e-07	6.49069			0.114203	1.08258
	97M44_BF125L_OpxNW3.1	2.00159e+09		0.00203294	1.41e-07	7.17289			0.0703172	1.07884
	97M44_BF125L_OpxNW10.1	2.01352e+09		0.00203351	4.2e-07	7.45727			0.209455	1.09673
	97M44_BF125L_OpxNW5.1	1.97446e+09		0.00203144	2.52e-07	6.43223			0.125673	1.08385
	97M44_BF125L_OpxNW8.1	1.97395e+09		0.00203243	3.58e-07	6.91973			0.178536	1.09125
	97M44_BF125L_OpxNW7.1	1.95218e+09		0.00203185	3.88e-07	6.63387			0.193497	1.09379
	97M44_BF125L_OpxNW3.2	1.9629e+09		0.00203175	4.02e-07	6.58235			0.200479	1.09505
	97M44_BF125L_OpxNW8.2	1.94789e+09		0.00203246	1.72e-07	6.9341			0.085777	1.07995
	97M44_BF125L_OpxNW5.2	1.96754e+09		0.00203128	5.93e-07	6.34999			0.295731	1.11642
	97M44_BF109C_OpxSE2.1	1.93716e+09		0.00203042	6.11e-07	5.92343			0.304708	1.11883
	97M44_BF109C_OpxSE2.1	1.93239e+09		0.00203155	1.14e-07	6.48772			0.0568522	1.07804
	97M44_BF109C_OpxSE7.1	1.99557e+09		0.00203143	2.58e-07	6.42678			0.128665	1.0842
	97M44_BF109C_OpxSE3.1	1.96938e+09		0.00203179	3.52e-07	6.60613			0.175544	1.09076
	97M44_BF109C_OpxSE6.1	2.01631e+09		0.00203145	2.62e-07	6.43619			0.13066	1.08444
	Session-220520
	BF106
1	97SL65CPX Di (average, n=6)	2.00353e+09		0.00204043	1.03249e-06	4.87	-7.01661e-14	4.87		0.514908
	97SL65_BF106_Di1.1	2.013e+09		0.00204048	3.51e-07	4.8961			0.175045	0.543849
	97SL65_BF106_Di2.1	2.00556e+09		0.00204089	1.6e-07	5.09802			0.0797925	0.521054
	97SL65_BF106_Di3.1	2.02265e+09		0.0020395	3.89e-07	4.41446			0.193996	0.550241
	97SL65_BF106_Di8.1	1.97839e+09		0.00204091	3.79e-07	5.10836			0.189009	0.548502
	97SL65_BF106_Di9.1	2.00659e+09		0.0020405	2.56e-07	4.90398			0.127668	0.5305
	97SL65_BF106_Di10.1	1.99497e+09		0.00204028	1.72e-07	4.79908			0.085777	0.522004
1	95AK24 (or UWC3) Di (average, n=6)	2.0451e+09		0.00205139	4.90036e-07	10.2664	0.0864318	10.18		0.244383
	UWC3_BF106_Di1.1	2.06336e+09		0.00205178	5.18e-07	10.4606			0.258328	0.576077
	UWC3_BF106_Di1.2	2.04677e+09		0.00205135	2.79e-07	10.2499			0.139138	0.533376
	UWC3_BF106_Di1.3	2.05237e+09		0.00205146	2.09e-07	10.3025			0.104229	0.525352
	UWC3_BF106_Di2.1	2.02563e+09		0.00205129	2.97e-07	10.2178			0.148115	0.535788
	UWC3_BF106_Di3.1	2.04259e+09		0.00205103	5.2e-07	10.0903			0.259326	0.576525
	UWC3_BF106_Di3.2	2.03988e+09		0.00205141	3.34e-07	10.2774			0.166567	0.54118
1	NIJ-JD Jadeite (average, n=6)	2.0202e+09		0.00203634	1.37797e-06	2.85789	-7.22211	10.08		0.687198
	NIJ_BF106_Jd1.1	2.04487e+09		0.00203563	4.12e-07	2.50856			0.205466	0.554389
	NIJ_BF106_Jd1.2	2.02177e+09		0.00203551	3.25e-07	2.44897			0.162079	0.539815
	NIJ_BF106_Jd2.1	2.02181e+09		0.00203679	2.2e-07	3.07737			0.109715	0.526468
	NIJ_BF106_Jd2.2	2.0158e+09		0.00203634	4.62e-07	2.85625			0.230401	0.564106
	NIJ_BF106_Jd3.1	2.01437e+09		0.00203645	1.49e-07	2.91338			0.0743068	0.520242
	NIJ_BF106_Jd3.2	2.00259e+09		0.00203733	5.17e-07	3.34282			0.25783	0.575853
1	NRM-AG1 Cpx (average, n=5 out of 6)	2.08203e+09		0.00204269	8.96815e-07	5.98547	0.485467	5.5		0.447245
	NRM-AG1_BF064_Cpx1.1	2.06333e+09		0.00204262	3.27e-07	5.94755			0.163076	0.540115
	NRM-AG1_BF064_Cpx2.1	2.09203e+09		0.00204226	2.66e-07	5.77272			0.132655	0.531722
	NRM-AG1_BF064_Cpx3.1	2.08385e+09		0.00204306	3.69e-07	6.16571			0.184022	0.546804
	NRM-AG1_BF064_Cpx4.1	2.1517e+09		0.0020397	7.44e-07	4.51197			0.371035	0.634664	outlier; rejected
	NRM-AG1_BF064_Cpx5.1	2.08439e+09		0.00204325	5.06e-07	6.25879			0.252344	0.573418
	NRM-AG1_BF064_Cpx5.2	2.08657e+09		0.00204228	2.1e-07	5.78257			0.104728	0.525451
1	NSH6CPX (average, n=6)	2.06804e+09		0.00204008	7.98478e-07	4.69878	-0.471219	5.17		0.398204	6.09?
	NSH6_BF106_Cpx1.1	2.08369e+09		0.00203968	1.38e-07	4.5031			0.0688211	0.519487
	NSH6_BF106_Cpx1.2	2.06576e+09		0.00204012	4.09e-07	4.71635			0.20397	0.553836
	NSH6_BF106_Cpx1.3	2.07381e+09		0.00203982	4.99e-07	4.57008			0.248853	0.57189
	NSH6_BF106_Cpx2.1	2.06977e+09		0.00203975	4.16e-07	4.53758			0.207461	0.555131
	NSH6_BF106_Cpx2.2	2.05312e+09		0.00204048	9.6e-08	4.89659			0.0478755	0.517129
	NSH6_BF106_Cpx2.3	2.06207e+09		0.00204063	5.07e-07	4.96899			0.252843	0.573638
1	QLP08-1OMP (average, n=6)	2.03443e+09		0.00201113	1.31333e-06	-9.55671	-1.94671	-7.61		0.65496
	QLP08-1_BF106_Omp1.1	2.05327e+09		0.00201109	3.56e-07	-9.57641			0.177538	0.544656
	QLP08-1_BF106_Omp2.1	2.03753e+09		0.00201231	2.61e-07	-8.97854			0.130162	0.531105
	QLP08-1_BF106_Omp3.1	2.02848e+09		0.002011	3.2e-07	-9.62221			0.159585	0.539072
	QLP08-1_BF106_Omp5.1	2.03726e+09		0.00201133	2.04e-07	-9.46265			0.101735	0.524863
	QLP08-1_BF106_Omp6.1	2.02657e+09		0.00201061	2.21e-07	-9.8128			0.110213	0.526572
	QLP08-1_BF106_Omp7.1	2.02345e+09		0.00201046	2.94e-07	-9.88766			0.146619	0.535376
1	97M44OPX (average, n=6)	2.07745e+09		0.00204202	4.11264e-07	5.65542	-2.33458	7.99		0.205099
	97M44_BF106_Opx1.1	2.07859e+09		0.0020418	2.3e-07	5.54814			0.114702	0.527529
	97M44_BF106_Opx17.1	2.08038e+09		0.00204178	4.28e-07	5.53682			0.213445	0.557395
	97M44_BF106_Opx2.1	2.06552e+09		0.00204197	1.68e-07	5.62891			0.0837822	0.52168
	97M44_BF106_Opx20.1	2.08551e+09		0.00204213	2.41e-07	5.70771			0.120188	0.528749
	97M44_BF106_Opx22.1	2.06854e+09		0.00204229	2.39e-07	5.78897			0.11919	0.528523
	97M44_BF106_Opx7.1	2.0862e+09		0.00204216	2.04e-07	5.72199			0.101735	0.524863
1	NRM-EN2 Opx (average, n=6)	2.03434e+09		0.00203638	3.70672e-07	2.87661	-2.72339	5.6		0.184855
	NRM-EN2_BF106_Opx1.1	2.01618e+09		0.00203649	3.74e-07	2.92914			0.186515	0.547648
	NRM-EN2_BF106_Opx1.2	2.03436e+09		0.00203636	4.54e-07	2.86561			0.226411	0.562488
	NRM-EN2_BF106_Opx2.1	2.04083e+09		0.00203663	2.78e-07	3.00153			0.13864	0.533246
	NRM-EN2_BF106_Opx2.2	2.01178e+09		0.00203613	2.29e-07	2.75086			0.114203	0.527421
	NRM-EN2_BF106_Opx3.1	2.04586e+09		0.00203622	5.12e-07	2.79912			0.255336	0.574741
	NRM-EN2_BF106_Opx3.2	2.05702e+09		0.00203645	2.19e-07	2.91338			0.109216	0.526364
1	06JY34OPX-A (average, n=6)	1.98721e+09		0.00203576	1.01354e-06	2.57053	-3.06947	5.64		0.505458
	06JY34A_BF106_Opx1.1	1.9791e+09		0.00203504	1.92e-07	2.21455			0.095751	0.523736
	06JY34A_BF106_Opx2.1	1.98349e+09		0.00203644	1.9e-07	2.90599			0.0947536	0.523554
	06JY34A_BF106_Opx3.1	1.98077e+09		0.00203585	2.81e-07	2.61641			0.140136	0.533637
	06JY34A_BF106_Opx4.1	1.98535e+09		0.00203608	3.07e-07	2.73017			0.153102	0.537188
	06JY34A_BF106_Opx5.1	1.99936e+09		0.00203581	3.83e-07	2.59523			0.191003	0.549193
	06JY34A_BF106_Opx6.1	1.99519e+09		0.00203533	1.91e-07	2.36081			0.0952523	0.523645
	Session-220819
	BF106 & BF064
1	97SL65CPX Di (average, n=42 out of 43)	7.84776e+08		0.00205652	1.415e-06	4.87	-7.01661e-14	4.87		0.705664
	97SL65_BF106_Di1.1	7.53485e+08		0.00205685	3.46e-07	5.03169			0.172551	0.726454
	97SL65_BF106_Di2.1	7.56728e+08		0.00205665	1.96e-07	4.93103			0.0977459	0.712402
	97SL65_BF106_Di3.1	7.58603e+08		0.00205739	9.32e-07	5.29555			0.464792	0.844981
	97SL65_Z7141_Di1.1	7.68658e+08		0.00205591	2.85e-07	4.57287			0.14213	0.719836
	97SL65_Z7141_Di2.1	7.62383e+08		0.00205597	5.32e-07	4.59877			0.26531	0.753891
	97SL65_Z7141_Di3.1	7.6679e+08		0.00205625	5.6e-07	4.73802			0.279274	0.758918
	97SL65_Z7141_Di4.1	7.59914e+08		0.00205629	8.5e-07	4.7561			0.423898	0.823196
	97SL65_Z7141_Di6.1	7.64297e+08		0.00205596	5.59e-07	4.59779			0.278775	0.758734
	97SL65_Z7141_Di5.1	7.56985e+08		0.00205581	3.63e-07	4.52254			0.181029	0.728515
	97SL65_Z7141_Di1.2	7.57727e+08		0.00205588	3.22e-07	4.55479			0.160582	0.723705
	97SL65_Z7141_Di4.2	7.46306e+08		0.00205654	3.18e-07	4.87679			0.158588	0.723265
	97SL65_Z7141_Di5.2	7.45437e+08		0.00205573	4.93e-07	4.48247			0.245861	0.747268
	97SL65_Z7142_Di1.1	7.29988e+08		0.00205553	4.84e-07	4.38524			0.241372	0.745803
	97SL65_Z7142_Di1.3	7.32886e+08		0.00205651	4.14e-07	4.8636			0.206463	0.735248
	97SL65_Z7142_Di2.1	7.70113e+08		0.00205633	4.21e-07	4.77516			0.209954	0.736236
	97SL65_Z7142_Di3.1	7.77501e+08		0.00205595	3.43e-07	4.59193			0.171055	0.726101
	97SL65_Z7142_Di1.2	7.70495e+08		0.00205634	4.23e-07	4.78053			0.210952	0.736521
	97SL65_Z7142_Di2.2	7.71827e+08		0.00205593	6.05e-07	4.58264			0.301716	0.76746
	97SL65_Z7142_Di3.2	7.7479e+08		0.00205634	5.44e-07	4.78005			0.271295	0.756018
	97SL65_BF106_Di4.1	7.75858e+08		0.00205532	6.19e-07	4.28067			0.308697	0.770231
	97SL65_BF106_Di18.1	7.79195e+08		0.00205657	5.02e-07	4.8939			0.250349	0.748757
	97SL65_BF106_Di5.1	7.77583e+08		0.00205554	4.5e-07	4.38866			0.224417	0.74049
	97SL65_BF106_Di17.1	7.8809e+08		0.00205653	6.69e-07	4.87337			0.333633	0.780559
	97SL65_BF106_Di6.1	7.73641e+08		0.00205697	4.85e-07	5.08788			0.241871	0.745965
	97SL65_BF106_Di9.1	7.79732e+08		0.0020565	5.05e-07	4.86116			0.251845	0.749258
	97SL65_BF106_Di16.1	7.81151e+08		0.00205659	8.53e-07	4.9022			0.425394	0.823967
	97SL65_BF106_Di7.1	7.74119e+08		0.00205634	4.22e-07	4.78249			0.210453	0.736378
	97SL65_BF106_Di15.1	7.77692e+08		0.00205661	2.59e-07	4.91393			0.129164	0.717388
	97SL65_BF106_Di8.1	7.80738e+08		0.00205639	4.05e-07	4.8079			0.201975	0.734
	97SL65_BF106_Di14.1	7.79091e+08		0.00205571	3.96e-07	4.47319			0.197487	0.732778
	97SL65_BF106_Di13.1	7.85245e+08		0.00205689	3.96e-07	5.05172			0.197487	0.732778
	97SL65_BF106_Di10.1	7.91301e+08		0.00205625	2.15e-07	4.73754			0.107221	0.713764
	97SL65_BF106_Di12.1	5.92069e+08		0.00205134	6.3e-07	2.33643			0.314183	0.772446	low CPS / outlier; rejected
	97SL65_BF106_Di11.1	7.93248e+08		0.00205686	3.26e-07	5.0356			0.162577	0.72415
	97SL65_BF106_Di10.2	7.96442e+08		0.00205701	4.94e-07	5.10938			0.246359	0.747432
	97SL65_BF064_Di1.1	8.23246e+08		0.00205689	4.04e-07	5.04732			0.201476	0.733863
	97SL65_BF064_Di15.1	8.81217e+08		0.00205754	2.4e-07	5.3664			0.119689	0.715743
	97SL65_BF064_Di2.1	8.24747e+08		0.0020567	6.97e-07	4.95693			0.347596	0.786629
	97SL65_BF064_Di14.1	8.81133e+08		0.00205772	6.14e-07	5.45777			0.306204	0.769235
	97SL65_BF064_Di3.1	8.17922e+08		0.00205719	2.91e-07	5.1988			0.145123	0.720432
	97SL65_BF064_Di13.1	8.80797e+08		0.00205855	3.14e-07	5.85893			0.156593	0.72283
	97SL65_BF064_Di4.1	8.20299e+08		0.00205653	3.38e-07	4.87631			0.168562	0.725517
	97SL65_BF064_Di12.1	8.73202e+08		0.00205855	3.8e-07	5.8604			0.189507	0.730668
1	95AK24 (or UWC3) Di (average, n=12)	8.08097e+08		0.00206753	1.36289e-06	10.2486	0.0685847	10.18		0.67968
	UWC3_BF064_Di1.1	8.23929e+08		0.00206838	1.72e-07	10.6665			0.085777	0.710859
	UWC3_BF064_Di2.1	8.25665e+08		0.00206826	6.17e-07	10.6074			0.3077	0.769832
	UWC3_BF064_Di3.1	8.22869e+08		0.00206808	5.95e-07	10.5175			0.296729	0.765513
	UWC3_BF064_Di6.1	8.30916e+08		0.0020678	2.72e-07	10.3792			0.135647	0.718584
	UWC3_BF106_Di1.1	8.06657e+08		0.00206695	8.03e-07	9.96583			0.400459	0.811375
	UWC3_BF106_Di1.2	7.91865e+08		0.00206686	5.03e-07	9.92039			0.250848	0.748924
	UWC3_BF106_Di1.3	7.93338e+08		0.00206695	3.96e-07	9.96437			0.197487	0.732778
	UWC3_BF106_Di2.1	7.90454e+08		0.00206723	6.15e-07	10.1017			0.306703	0.769434
	UWC3_BF106_Di3.1	7.94892e+08		0.00206642	7.84e-07	9.70442			0.390983	0.80674
	UWC3_BF106_Di3.2	7.92712e+08		0.0020685	6.81e-07	10.7242			0.339617	0.783136
	UWC3_BF106_Di3.3	8.00894e+08		0.0020673	3.59e-07	10.1373			0.179035	0.728022
	UWC3_BF064_Di10.1	8.22979e+08		0.00206762	5.74e-07	10.2942			0.286256	0.761515
1	06JY31CPX (average, n=6)	7.95277e+08		0.00205595	1.1111e-06	4.59193	-0.598075	5.19		0.554108	not OPX
	06JY31_BF106_Cpx <-- 06JY31_BF106_Opx1.1	7.95614e+08		0.00205578	2.96e-07	4.50788			0.147616	0.720939
	06JY31_BF106_Cpx <-- 06JY31_BF106_Opx1.2	7.97143e+08		0.0020565	3.45e-07	4.85676			0.172053	0.726336
	06JY31_BF106_Cpx <-- 06JY31_BF106_Opx2.1	8.13145e+08		0.00205503	2.32e-07	4.14288			0.115699	0.715086
	06JY31_BF106_Cpx <-- 06JY31_BF106_Opx3.1	7.88956e+08		0.00205612	6.54e-07	4.67499			0.326152	0.777391
	06JY31_BF106_Cpx <-- 06JY31_BF106_Opx4.1	7.86426e+08		0.00205577	7.5e-07	4.50348			0.374028	0.798661
	06JY31_BF106_Cpx <-- 06JY31_BF106_Opx4.2	7.90375e+08		0.00205651	3.67e-07	4.86556			0.183024	0.729013
1	NIJ-JD Jadeite (average, n=6)	7.78513e+08		0.00205218	1.05915e-06	2.74687	-7.33313	10.08		0.5282
	NIJ_BF106_Jd1.1	7.8615e+08		0.00205177	4.37e-07	2.54849			0.217933	0.738551
	NIJ_BF106_Jd1.2	7.75451e+08		0.00205194	3.08e-07	2.63058			0.153601	0.722188
	NIJ_BF106_Jd2.1	7.77783e+08		0.00205301	4.16e-07	3.15146			0.207461	0.735528
	NIJ_BF106_Jd2.2	7.76991e+08		0.00205245	5.23e-07	2.88076			0.260822	0.752323
	NIJ_BF106_Jd3.1	7.77899e+08		0.00205155	4.51e-07	2.44099			0.224915	0.740641
	NIJ_BF106_Jd3.2	7.76801e+08		0.00205235	5.51e-07	2.82896			0.274786	0.757278
1	NRM-AG1 CPX (average, n=10)	8.57731e+08		0.00206013	9.68599e-07	6.63448	1.13448	5.5		0.483044
	NRM-AG1_BF064_Cpx1.1	8.58027e+08		0.00205998	5.59e-07	6.55913			0.278775	0.758734
	NRM-AG1_BF064_Cpx1.2	8.54201e+08		0.00205973	7.3e-07	6.43649			0.364053	0.794038
	NRM-AG1_BF064_Cpx2.1	8.55266e+08		0.0020598	5.44e-07	6.47118			0.271295	0.756018
	NRM-AG1_BF064_Cpx2.2	8.42367e+08		0.00206122	5.96e-07	7.16454			0.297227	0.765706
	NRM-AG1_BF064_Cpx3.1	8.54395e+08		0.00206022	3.77e-07	6.67836			0.188011	0.730281
	NRM-AG1_BF064_Cpx3.2	8.72731e+08		0.00206066	4.56e-07	6.89384			0.227409	0.741402
	NRM-AG1_BF064_Cpx4.1	8.46058e+08		0.00206028	3.52e-07	6.70816			0.175544	0.727171
	NRM-AG1_BF064_Cpx4.2	8.57295e+08		0.00205982	4.89e-07	6.48144			0.243866	0.746614
	NRM-AG1_BF064_Cpx5.1	8.64391e+08		0.00205989	1.65e-07	6.51516			0.0822861	0.710446
	NRM-AG1_BF064_Cpx5.2	8.72574e+08		0.00205973	6.31e-07	6.43649			0.314682	0.772649
1	NSH6CPX (average, n=6)	8.04438e+08		0.00205587	9.82963e-07	4.55072	-0.619282	5.17		0.490207	6.09?
	NSH6_BF106_Cpx1.1	8.11072e+08		0.00205531	6.3e-07	4.27969			0.314183	0.772446
	NSH6_BF106_Cpx1.2	7.71303e+08		0.00205584	5.1e-07	4.53427			0.254339	0.7501
	NSH6_BF106_Cpx1.3	8.1345e+08		0.00205565	8.18e-07	4.44436			0.407939	0.815093
	NSH6_BF106_Cpx2.1	8.12847e+08		0.00205581	5.77e-07	4.52205			0.287752	0.762078
	NSH6_BF106_Cpx2.2	8.07934e+08		0.00205679	8.83e-07	4.99993			0.440355	0.83179
	NSH6_BF106_Cpx2.3	8.10022e+08		0.00205581	4.13e-07	4.52401			0.205964	0.735108
1	NSH9CPX (average, n=6)	8.12586e+08		0.00205553	1.30236e-06	4.38735	-0.762646	5.15		0.649492	5.33?
	NSH9_BF106_Cpx1.1	8.14727e+08		0.00205445	3.08e-07	3.85605			0.153601	0.722188
	NSH9_BF106_Cpx1.2	8.05703e+08		0.00205611	6.6e-07	4.67011			0.329144	0.778651
	NSH9_BF106_Cpx1.3	8.12417e+08		0.00205515	4.85e-07	4.1976			0.241871	0.745965
	NSH9_BF106_Cpx2.1	8.07743e+08		0.00205608	4.13e-07	4.65447			0.205964	0.735108
	NSH9_BF106_Cpx2.2	8.19102e+08		0.00205592	3.45e-07	4.57776			0.172053	0.726336
	NSH9_BF106_Cpx2.3	8.15825e+08		0.0020555	4.17e-07	4.36813			0.207959	0.735669
1	QJH01-1OMP (average, n=7)	8.62984e+08		0.00205315	7.23916e-07	3.22196	-0.318042	3.54		0.361019
	QJH01-1_BF064_Omp1.1	8.38976e+08		0.00205273	7.04e-07	3.01708			0.351087	0.788178
	QJH01-1_BF064_Omp3.1	8.5238e+08		0.00205275	6.04e-07	3.02686			0.301217	0.767264
	QJH01-1_BF064_Omp5.1	8.49345e+08		0.00205287	4.98e-07	3.08647			0.248354	0.748092
	QJH01-1_BF064_Omp7.1	8.49581e+08		0.00205328	3.74e-07	3.28778			0.186515	0.729897
	QJH01-1_BF064_Omp9.1	8.78404e+08		0.00205356	5.25e-07	3.42167			0.261819	0.75267
	QJH01-1_BF064_Omp11.1	8.76383e+08		0.00205356	3.44e-07	3.42264			0.171554	0.726218
	QJH01-1_BF064_Omp14.1	8.95819e+08		0.00205329	6.07e-07	3.2912			0.302713	0.767852
1	QLP08-1OMP (average, n=10)	8.10415e+08		0.00202699	7.1624e-07	-9.55995	-1.94995	-7.61		0.357191
	QLP08-1_BF064_Omp1.1	8.22303e+08		0.0020274	5.59e-07	-9.35786			0.278775	0.758734
	QLP08-1_BF064_Omp4.1	8.2085e+08		0.00202711	3.5e-07	-9.49907			0.174546	0.726931
	QLP08-1_BF064_Omp8.1	8.30902e+08		0.00202751	5.39e-07	-9.30557			0.268801	0.755127
	QLP08-1_BF064_Omp12.1	8.28074e+08		0.00202652	4.86e-07	-9.78736			0.24237	0.746127
	QLP08-1_BF064_Omp13.1	8.32553e+08		0.00202702	4.14e-07	-9.54598			0.206463	0.735248
	QLP08-1_BF106_Omp1.1	7.9002e+08		0.00202661	4.94e-07	-9.74485			0.246359	0.747432
	QLP08-1_BF106_Omp4.1	7.85268e+08		0.0020266	7.34e-07	-9.75169			0.366048	0.794955
	QLP08-1_BF106_Omp8.1	7.95854e+08		0.00202696	6.08e-07	-9.57432			0.303212	0.768049
	QLP08-1_BF106_Omp15.1	7.92232e+08		0.00202679	4.82e-07	-9.6569			0.240375	0.745481
	QLP08-1_BF106_Omp18.1	8.06096e+08		0.00202737	1.91e-07	-9.37594			0.0952523	0.712064
1	97M44OPX (average, n=78)	7.91068e+08		0.00205761	1.49283e-06	5.40374	-2.58626	7.99		0.744479
	97M44_Z7144_Opx2.1	8.41626e+08		0.00205876	1.5e-07	5.96496			0.0748055	0.709618
	97M44_Z7144_Opx3.1	8.50623e+08		0.00205943	4.22e-07	6.28892			0.210453	0.736378
	97M44_Z7144_Opx2.2	8.21402e+08		0.00205805	5.03e-07	5.61413			0.250848	0.748924
	97M44_Z7144_Opx3.2	8.30149e+08		0.00205886	5.4e-07	6.01285			0.2693	0.755304
	97M44_Z7143_Opx1.1	8.20936e+08		0.00205745	1.44e-07	5.32242			0.0718133	0.709309
	97M44_Z7143_Opx2.1	8.19245e+08		0.00205819	7.21e-07	5.68352			0.359565	0.791991
	97M44_BF106_Opx1.1	7.91919e+08		0.00205752	2.09e-07	5.35662			0.104229	0.71332
	97M44_BF106_Opx22.1	7.81712e+08		0.00205696	4.13e-07	5.08299			0.205964	0.735108
	97M44_BF106_Opx13.1	7.75479e+08		0.00205828	8.19e-07	5.7314			0.408438	0.815343
	97M44_BF106_Opx14.1	7.73975e+08		0.0020587	5.2e-07	5.93565			0.259326	0.751806
	97M44_Z7141_Opx2.1	7.85005e+08		0.0020569	3.81e-07	5.05612			0.190006	0.730797
	97M44_Z7141_Opx3.1	7.80501e+08		0.00205711	3.88e-07	5.15922			0.193497	0.731713
	97M44_Z7141_Opx20.1	7.77249e+08		0.00205821	2.68e-07	5.6928			0.133653	0.71821
	97M44_Z7141_Opx5.1	7.8653e+08		0.00205677	4.14e-07	4.99358			0.206463	0.735248
	97M44_Z7141_Opx19.1	7.87003e+08		0.00205794	4.16e-07	5.56136			0.207461	0.735528
	97M44_Z7141_Opx6.1	7.68827e+08		0.0020585	5.06e-07	5.83499			0.252344	0.749426
	97M44_Z7141_Opx18.1	7.76955e+08		0.00205687	4.92e-07	5.03804			0.245362	0.747104
	97M44_Z7141_Opx7.1	7.70453e+08		0.00205715	1.76e-07	5.17583			0.0877718	0.711102
	97M44_Z7141_Opx17.1	7.8298e+08		0.00205806	6.76e-07	5.62097			0.337123	0.782058
	97M44_Z7141_Opx8.1	7.65679e+08		0.00205702	2.78e-07	5.11378			0.13864	0.719154
	97M44_Z7141_Opx16.1	7.76645e+08		0.00205922	6.11e-07	6.18875			0.304708	0.768641
	97M44_Z7141_Opx9.1	7.831e+08		0.00205755	4.45e-07	5.37324			0.221923	0.739738
	97M44_Z7141_Opx15.1	7.75485e+08		0.0020576	5.07e-07	5.39767			0.252843	0.749594
	97M44_Z7141_Opx10.1	7.79874e+08		0.00205685	3.76e-07	5.03169			0.187512	0.730153
	97M44_Z7141_Opx14.1	7.79411e+08		0.00205756	4.15e-07	5.37715			0.206962	0.735388
	97M44_Z7141_Opx11.1	7.78851e+08		0.00205681	5.93e-07	5.01214			0.295731	0.765127
[truncated: 1,084 more rows]
